# Supplementary material for: Identification of Gene Modules and Hub Genes Involved in Mastitis Development Using a Systems Biology Approach
Source: Front Genet. 2020 Jul 13;11:722. doi: 10.3389/fgene.2020.00722 (PMC7371005; doi:10.3389/fgene.2020.00722)
Supplement: FILE S10 — The complete list of the functional enrichment analysis of the hub genes in the eight non-preserved modules. [file Table_10.XLSX]

## Sheet: blue
Supplementary File S10: The complete list of the functional enrichment analysis of the hub genes in the eight non-preserved modules
GO	Term	Overlap	P-value	Adjusted P-value	Odds Ratio	Genes		KEGG	Term	Overlap	P-value	Adjusted P-value	Odds Ratio	Genes
	regulation of cellular amino acid metabolic process (GO:0006521)	15/51	1.36251e-12	3.47646e-09	11.5567	PSMD12;PSMD14;PSMA6;PSMA3;PSMD7;PSMA4;PSMC6;PSMA1;PSMD5;PSME4;PSMB1;PSMC2;PSME1;PSMD1;PSME2		.	Proteasome	15/45	1.69572e-13	5.22281e-11	13.0976	PSMD12;PSMD14;POMP;PSMA6;PSMA3;PSMD7;PSMC6;PSMA4;PSMA1;PSMB1;PSMC2;PSME4;PSME1;PSMD1;PSME2
	regulation of cellular amine metabolic process (GO:0033238)	15/51	1.36251e-12	6.95291e-09	11.5567	PSMD12;PSMD14;PSMA6;PSMA3;PSMD7;PSMA4;PSMC6;PSMA1;PSMD5;PSME4;PSMB1;PSMC2;PSME1;PSMD1;PSME2		.	Basal transcription factors	6/45	0.000925523	0.0570122	5.23903	GTF2A2;CCNH;GTF2B;TAF9;GTF2H1;MNAT1
	regulation of transcription from RNA polymerase II promoter in response to hypoxia (GO:0061418)	17/78	9.05537e-12	1.54032e-08	8.5638	PSMD12;PSMD14;CUL2;HIGD1A;PSMA6;PSMA3;PSMD7;PSMA4;PSMC6;PSMA1;PSMD5;PSME4;PSMB1;PSMC2;PSME1;PSMD1;PSME2		.	Nucleotide excision repair	6/47	0.00116899	0.0600079	5.01609	CCNH;POLE3;XPA;ERCC8;GTF2H1;MNAT1
	NIK/NF-kappaB signaling (GO:0038061)	17/80	1.39798e-11	1.78347e-08	8.34971	PSMD12;PSMD14;TANK;PSMA6;PSMA3;PSMD7;PSMA4;PSMC6;PSMA1;PSMD5;PSME4;PSMB1;PSMC2;PSME1;PSMD1;PSME2;BIRC3		.	Epstein-Barr virus infection	14/201	0.000662873	0.068055	2.73681	PSMD12;PSMD14;STAT1;STAT2;CXCL10;PSMD7;PSMC6;CASP8;PSMC2;PSMD1;FAS;CYCS;CD247;B2M
	regulation of transcription from RNA polymerase II promoter in response to stress (GO:0043618)	18/93	1.85887e-11	1.89716e-08	7.60504	PSMD12;PSMD14;CUL2;HIGD1A;PSMA6;PSMA3;PSMD7;PSMA4;PSMC6;PSMA1;PSMD5;HSF2;PSME4;PSMB1;PSMC2;PSME1;PSMD1;PSME2		.	RNA degradation	8/79	0.000892228	0.0687016	3.97901	HSPA9;BTG3;LSM8;PNPT1;XRN2;PARN;CNOT10;LSM5
	regulation of cellular ketone metabolic process (GO:0010565)	15/61	2.38553e-11	2.02889e-08	9.66215	PSMD12;PSMD14;PSMA6;PSMA3;PSMD7;PSMA4;PSMC6;PSMA1;PSMD5;PSME4;PSMB1;PSMC2;PSME1;PSMD1;PSME2		.	NOD-like receptor signaling pathway	13/178	0.000657081	0.101191	2.86969	GBP5;GABARAPL1;STAT1;STAT2;TXN;TANK;CASP8;CASP4;VDAC3;DNM1L;MCU;GBP4;BIRC3
	negative regulation of G2/M transition of mitotic cell cycle (GO:0010972)	15/62	3.07413e-11	2.24104e-08	9.50631	PSMD12;PSMD14;PSMA6;PSMA3;PSMD7;PSMA4;PSMC6;PSMA1;PSMD5;PSME4;PSMB1;PSMC2;PSME1;PSMD1;PSME2		.	Necroptosis	11/162	0.00295989	0.130235	2.66802	TICAM2;CASP8;STAT1;STAT2;TNFSF10;VDAC3;PLA2G4A;FAS;DNM1L;SLC25A5;BIRC3
	tumor necrosis factor-mediated signaling pathway (GO:0033209)	20/123	3.99639e-11	2.5492e-08	6.38906	PSMD12;PSMD14;STAT1;TANK;TNFSF13B;PSMA6;PSMA3;PSMD7;PSMA4;PSMC6;PSMA1;PSMD5;PSME4;PSMB1;PSMC2;PSME1;PSMD1;PSME2;FAS;BIRC3		.	Homologous recombination	5/41	0.00368496	0.141871	4.7918	RAD50;MRE11;RAD51C;TOPBP1;SSBP1
	antigen processing and presentation of exogenous peptide antigen via MHC class I, TAP-dependent (GO:0002479)	16/75	5.25729e-11	2.98088e-08	8.38245	PSMD12;PSMD14;PSMA6;PSMA3;PSMD7;PSMA4;PSMC6;PSMA1;PSMD5;PSME4;PSMB1;PSMC2;PSME1;PSMD1;PSME2;B2M		.	Oxidative phosphorylation	9/133	0.00703102	0.196869	2.65891	ATP5PF;ATP6V1G1;COX7B;PPA1;NDUFB5;NDUFB3;ATP6V1E1;NDUFV2;ATP6V1D
	regulation of stem cell differentiation (GO:2000736)	17/88	7.00006e-11	3.24739e-08	7.59064	PSMD12;PSMD14;PSMA6;PSMA3;ITCH;PSMD7;PSMA4;PSMC6;PSMA1;PSMD5;PSME4;PSMB1;PSMC2;PSME1;OCIAD1;PSMD1;PSME2		.	Citrate cycle (TCA cycle)	4/30	0.00672316	0.207073	5.23903	FH;MDH1;SUCLG2;DLD
	regulation of hematopoietic stem cell differentiation (GO:1902036)	16/76	6.50503e-11	3.31952e-08	8.27215	PSMD12;PSMD14;PSMA6;PSMA3;ITCH;PSMD7;PSMA4;PSMC6;PSMA1;PSMD5;PSME4;PSMB1;PSMC2;PSME1;PSMD1;PSME2		.	Hepatitis C	10/155	0.00642592	0.219909	2.53501	YWHAE;CXCL10;CASP8;RSAD2;STAT1;STAT2;CYCS;FAS;IFIT1;EIF2S1
	regulation of hematopoietic progenitor cell differentiation (GO:1901532)	16/77	8.02113e-11	3.41099e-08	8.16472	PSMD12;PSMD14;PSMA6;PSMA3;ITCH;PSMD7;PSMA4;PSMC6;PSMA1;PSMD5;PSME4;PSMB1;PSMC2;PSME1;PSMD1;PSME2		.	Huntington disease	11/193	0.010725	0.2541	2.23948	ATP5PF;COX7B;CASP8;NDUFB5;NDUFB3;VDAC3;TFAM;CYCS;NDUFV2;SLC25A5;POLR2K
	antigen processing and presentation of exogenous peptide antigen via MHC class I (GO:0042590)	16/78	9.85744e-11	3.86943e-08	8.06005	PSMD12;PSMD14;PSMA6;PSMA3;PSMD7;PSMA4;PSMC6;PSMA1;PSMD5;PSME4;PSMB1;PSMC2;PSME1;PSMD1;PSME2;B2M		.	Parkinson disease	9/142	0.0105835	0.271643	2.49038	ATP5PF;COX7B;NDUFB5;NDUFB3;VDAC3;CYCS;NDUFV2;SLC25A5;PRKACB
	negative regulation of cell cycle G2/M phase transition (GO:1902750)	15/69	1.59004e-10	5.40933e-08	8.5419	PSMD12;PSMD14;PSMA6;PSMA3;PSMD7;PSMA4;PSMC6;PSMA1;PSMD5;PSME4;PSMB1;PSMC2;PSME1;PSMD1;PSME2		.	DNA replication	4/36	0.0128247	0.282144	4.36586	RNASEH2B;POLE3;MCM6;SSBP1
	protein modification by small protein removal (GO:0070646)	28/261	1.52436e-10	5.55629e-08	4.21531	USP14;PSMD12;PSMD14;TANK;IFIH1;POLB;PSMD7;RHOT1;PSMD5;PSMB1;USP1;PSMD1;USP8;USP25;USP3;UCHL5;COPS4;PSMA6;PSMA3;PSMA4;PSMC6;PSMA1;PSME4;PSMC2;PSME1;PSME2;STAMBP;BIRC3		.	Non-alcoholic fatty liver disease (NAFLD)	9/149	0.0141683	0.290923	2.37339	COX7B;ITCH;CASP8;NDUFB5;NDUFB3;CYCS;FAS;NDUFV2;EIF2S1
	SCF-dependent proteasomal ubiquitin-dependent protein catabolic process (GO:0031146)	15/72	3.02149e-10	9.63666e-08	8.18599	PSMD12;PSMD14;PSMA6;PSMA3;PSMD7;PSMA4;PSMC6;PSMA1;PSMD5;PSME4;PSMB1;PSMC2;PSME1;PSMD1;PSME2		.	Pyruvate metabolism	4/39	0.0168744	0.324831	4.03002	FH;MDH1;GLO1;DLD
	protein deubiquitination (GO:0016579)	27/257	5.21497e-10	1.56541e-07	4.12803	USP14;PSMD12;PSMD14;TANK;IFIH1;POLB;PSMD7;RHOT1;PSMD5;PSMB1;USP1;PSMD1;USP8;USP25;USP3;UCHL5;PSMA6;PSMA3;PSMA4;PSMC6;PSMA1;PSME4;PSMC2;PSME1;PSME2;STAMBP;BIRC3		.	Glycine, serine and threonine metabolism	4/40	0.0183822	0.333043	3.92927	SRR;ALAS1;GLDC;DLD
	positive regulation of ubiquitin-protein ligase activity involved in regulation of mitotic cell cycle transition (GO:0051437)	15/76	6.76543e-10	1.918e-07	7.75514	PSMD12;PSMD14;PSMA6;PSMA3;PSMD7;PSMA4;PSMC6;PSMA1;PSMD5;PSME4;PSMB1;PSMC2;PSME1;PSMD1;PSME2		.	Tryptophan metabolism	4/42	0.0216421	0.37032	3.74216	KYNU;KYAT3;DLD;IDO1
	anaphase-promoting complex-dependent catabolic process (GO:0031145)	15/79	1.19717e-09	3.05458e-07	7.46065	PSMD12;PSMD14;PSMA6;PSMA3;PSMD7;PSMA4;PSMC6;PSMA1;PSMD5;PSME4;PSMB1;PSMC2;PSME1;PSMD1;PSME2		.	Measles	8/138	0.0250222	0.385342	2.27784	IFIH1;CASP8;STAT1;STAT2;IL2RB;CYCS;FAS;EIF2S1
	negative regulation of mitotic cell cycle phase transition (GO:1901991)	15/79	1.19717e-09	3.21535e-07	7.46065	PSMD12;PSMD14;PSMA6;PSMA3;PSMD7;PSMA4;PSMC6;PSMA1;PSMD5;PSME4;PSMB1;PSMC2;PSME1;PSMD1;PSME2		.	Aminoacyl-tRNA biosynthesis	5/66	0.0262772	0.385399	2.97672	RARS;SARS;TARS;IARS2;WARS2
	regulation of G2/M transition of mitotic cell cycle (GO:0010389)	20/149	1.35268e-09	3.28702e-07	5.27419	YWHAE;PSMD12;PSMD14;HAUS3;PSMA6;PSMA3;PSMD7;RAD51C;PSMA4;PSMC6;PSMA1;PSMD5;PSME4;CEP70;PSMB1;PSMC2;PSME1;PSMD1;PSME2;CEP63		.	Influenza A	9/171	0.031251	0.401054	2.06804	IFIH1;CXCL10;RSAD2;STAT1;STAT2;TNFSF10;CYCS;FAS;EIF2S1
	stimulatory C-type lectin receptor signaling pathway (GO:0002223)	18/121	1.6878e-09	3.91493e-07	5.8452	PSMD12;PSMD14;PSMA6;PSMA3;PSMD7;PSMA4;PSMC6;PSMA1;PSMD5;CLEC7A;PSME4;PSMB1;PSMC2;PSME1;PSMD1;PSME2;UBE2V1;PRKACB		.	Mitophagy	5/65	0.0247866	0.401804	3.02252	USP8;GABARAPL1;RHOT1;CALCOCO2;FUNDC1
	interleukin-1-mediated signaling pathway (GO:0070498)	16/95	2.12435e-09	4.5169e-07	6.61772	PSMD12;PSMD14;PSMA6;PSMA3;PSMD7;PSMA4;PSMC6;PSMA1;PSMD5;PSME4;PSMB1;PSMC2;PSME1;PSMD1;PSME2;UBE2V1		.	Collecting duct acid secretion	3/27	0.0304771	0.408128	4.36586	ATP6V1G1;ATP6V1E1;ATP6V1D
	positive regulation of ubiquitin protein ligase activity (GO:1904668)	15/82	2.06338e-09	4.57801e-07	7.18769	PSMD12;PSMD14;PSMA6;PSMA3;PSMD7;PSMA4;PSMC6;PSMA1;PSMD5;PSME4;PSMB1;PSMC2;PSME1;PSMD1;PSME2		.	Apoptosis	8/143	0.0300876	0.421227	2.19819	CASP8;BCL2A1;TNFSF10;CYCS;FAS;EIF2S1;CTSS;BIRC3
	regulation of primary metabolic process (GO:0080090)	19/139	2.56633e-09	4.85037e-07	5.37095	PSMD12;ALAS1;PSMD14;TIAM2;PSMA6;GLIPR1;PSMA3;PSMD7;PSMA4;PSMC6;PSMA1;PSMD5;PSME4;PSMB1;PSMC2;PSME1;PSMD1;PSME2;BBS4		.	Thermogenesis	11/231	0.0349381	0.430437	1.87108	ATP5PF;COX7B;RHEB;NDUFB5;NDUFB3;ACSL5;ACSL4;COX14;NDUFV2;PRKACB;COA5
	negative regulation of ubiquitin-protein ligase activity involved in mitotic cell cycle (GO:0051436)	14/71	2.55151e-09	5.00783e-07	7.74786	PSMD12;PSMD14;PSMA6;PSMA3;PSMD7;PSMA4;PSMC6;PSMA1;PSMD5;PSMB1;PSMC2;PSME1;PSMD1;PSME2		.	Non-homologous end-joining	2/13	0.0418869	0.444868	6.04504	RAD50;MRE11
	innate immune response activating cell surface receptor signaling pathway (GO:0002220)	18/124	2.52862e-09	5.16143e-07	5.70378	PSMD12;PSMD14;PSMA6;PSMA3;PSMD7;PSMA4;PSMC6;PSMA1;PSMD5;CLEC7A;PSME4;PSMB1;PSMC2;PSME1;PSMD1;PSME2;UBE2V1;PRKACB		.	Vibrio cholerae infection	4/50	0.0380548	0.450803	3.14342	ATP6V1G1;ATP6V1E1;PRKACB;ATP6V1D
	regulation of ubiquitin-protein ligase activity involved in mitotic cell cycle (GO:0051439)	14/72	3.09447e-09	5.63967e-07	7.64025	PSMD12;PSMD14;PSMA6;PSMA3;PSMD7;PSMA4;PSMC6;PSMA1;PSMD5;PSMB1;PSMC2;PSME1;PSMD1;PSME2		.	Ribosome biogenesis in eukaryotes	6/101	0.0442288	0.454082	2.33422	UTP15;XRN2;WDR75;NMD3;RIOK2;WDR43
	positive regulation of protein ubiquitination involved in ubiquitin-dependent protein catabolic process (GO:2000060)	15/87	4.8486e-09	8.53186e-07	6.77461	PSMD12;PSMD14;PSMA6;PSMA3;PSMD7;PSMA4;PSMC6;PSMA1;PSMD5;PSME4;PSMB1;PSMC2;PSME1;PSMD1;PSME2		.	Glyoxylate and dicarboxylate metabolism	3/30	0.0400168	0.456487	3.92927	MDH1;GLDC;DLD
	Wnt signaling pathway, planar cell polarity pathway (GO:0060071)	15/88	5.71e-09	9.71271e-07	6.69762	PSMD12;PSMD14;PSMA6;PSMA3;PSMD7;PSMA4;PSMC6;PSMA1;PSMD5;PSME4;PSMB1;PSMC2;PSME1;PSMD1;PSME2		.	Fatty acid biosynthesis	2/13	0.0418869	0.460756	6.04504	ACSL5;ACSL4
	regulation of establishment of planar polarity (GO:0090175)	15/89	6.70896e-09	1.06987e-06	6.62237	PSMD12;PSMD14;PSMA6;PSMA3;PSMD7;PSMA4;PSMC6;PSMA1;PSMD5;PSME4;PSMB1;PSMC2;PSME1;PSMD1;PSME2		.	Cellular senescence	8/160	0.0524489	0.521105	1.96464	RAD50;MRE11;RHEB;VDAC3;RAD1;LIN9;SLC25A5;MCU
	T cell receptor signaling pathway (GO:0050852)	20/163	6.60838e-09	1.08782e-06	4.82119	PSMD12;FYB1;PSMD14;PTPRJ;PSMA6;PSMA3;PSMD7;PTPRC;PSMA4;PSMC6;PSMA1;PSMD5;PSME4;PSMB1;PSMC2;PSME1;PSMD1;PSME2;UBE2V1;CD247		.	TNF signaling pathway	6/110	0.0620684	0.546202	2.14324	CXCL10;ITCH;CASP8;FAS;DNM1L;BIRC3
	negative regulation of ubiquitin protein ligase activity (GO:1904667)	14/77	7.74235e-09	1.19725e-06	7.14413	PSMD12;PSMD14;PSMA6;PSMA3;PSMD7;PSMA4;PSMC6;PSMA1;PSMD5;PSMB1;PSMC2;PSME1;PSMD1;PSME2		.	Hepatitis B	8/163	0.0572699	0.551223	1.92848	IFIH1;TICAM2;CASP8;STAT1;STAT2;VDAC3;CYCS;FAS
	positive regulation of canonical Wnt signaling pathway (GO:0090263)	16/113	2.80073e-08	4.20357e-06	5.56357	USP8;PSMD12;PSMD14;PSMA6;PSMA3;PSMD7;PSMA4;PSMC6;PSMA1;PSMD5;PSME4;PSMB1;PSMC2;PSME1;PSMD1;PSME2		.	Ubiquitin mediated proteolysis	7/137	0.061139	0.553848	2.00766	KLHL9;HERC4;ITCH;CUL5;CUL2;ERCC8;BIRC3
	cellular response to hypoxia (GO:0071456)	17/132	4.37347e-08	6.37653e-06	5.06043	PSMD12;PSMD14;CUL2;HIGD1A;PSMA6;PSMA3;PSMD7;PSMA4;PSMC6;PSMA1;PSMD5;PSME4;PSMB1;PSMC2;PSME1;PSMD1;PSME2		.	Peroxisome	5/83	0.0605218	0.56487	2.36703	SLC25A17;ACSL5;ACSL4;FAR2;PEX13
	regulation of mitotic cell cycle phase transition (GO:1901990)	20/184	5.25662e-08	7.45126e-06	4.27095	YWHAE;PSMD12;PSMD14;HAUS3;PSMA6;PSMA3;PSMD7;PSMA4;PSMC6;PSMA1;PSMD5;PSME4;CEP70;PSMB1;PSMC2;PSME1;PSMD1;PSME2;RIOK2;CEP63		.	Viral carcinogenesis	9/201	0.0722875	0.585909	1.75938	YWHAE;POLB;GTF2A2;CASP8;GTF2B;VDAC3;GTF2H1;CCR5;PRKACB
	cellular response to tumor necrosis factor (GO:0071356)	20/194	1.26801e-07	1.74882e-05	4.0508	PSMD12;PSMD14;STAT1;TANK;TNFSF13B;PSMA6;PSMA3;PSMD7;PSMA4;PSMC6;PSMA1;PSMD5;PSME4;PSMB1;PSMC2;PSME1;PSMD1;PSME2;FAS;BIRC3		.	Toxoplasmosis	6/113	0.0688356	0.588927	2.08634	CASP8;STAT1;LY96;CYCS;CCR5;BIRC3
	regulation of mRNA stability (GO:0043488)	16/128	1.6608e-07	2.23028e-05	4.91159	PSMD12;PSMD14;PARN;PSMA6;PSMA3;PSMD7;PSMA4;PSMC6;PSMA1;PSMD5;PSME4;PSMB1;PSMC2;PSME1;PSMD1;PSME2		.	Alzheimer disease	8/171	0.0714628	0.594879	1.83826	ATP5PF;COX7B;CASP8;NDUFB5;NDUFB3;CYCS;FAS;NDUFV2
	protein polyubiquitination (GO:0000209)	24/283	2.91055e-07	3.71313e-05	3.33225	PSMD12;WSB1;PSMD14;DTX3L;BFAR;TANK;HERC5;PSMA6;PSMA3;ITCH;PSMD7;PSMA4;PSMC6;PSMA1;PSMD5;PSME4;PSMB1;PSMC2;PSME1;PSMD1;PSME2;ERCC8;UBE2V1;HERC6		.	Ferroptosis	3/40	0.0810591	0.640159	2.94695	VDAC3;ACSL5;ACSL4
	cellular response to interleukin-1 (GO:0071347)	17/150	2.88349e-07	3.77294e-05	4.45318	PSMD12;PSMD14;TANK;PSMA6;PSMA3;PSMD7;PSMA4;PSMC6;PSMA1;PSMD5;PSME4;PSMB1;PSMC2;PSME1;PSMD1;PSME2;UBE2V1		.	Tuberculosis	8/179	0.0876196	0.674671	1.7561	HSPA9;FCGR3A;CASP8;CLEC7A;STAT1;LAMP2;CYCS;CTSS
	positive regulation of Wnt signaling pathway (GO:0030177)	16/140	5.74323e-07	7.14822e-05	4.4906	USP8;PSMD12;PSMD14;PSMA6;PSMA3;PSMD7;PSMA4;PSMC6;PSMA1;PSMD5;PSME4;PSMB1;PSMC2;PSME1;PSMD1;PSME2		.	Cell cycle	6/124	0.0971385	0.679969	1.90126	YWHAE;ORC4;DBF4;CCNH;ORC2;MCM6
	neutrophil degranulation (GO:0043312)	32/479	7.58605e-07	9.21705e-05	2.62498	ASAH1;PSMD12;PSMD14;COPB1;PTPRJ;SRP14;CTSS;GLIPR1;PSMD7;PSMB1;LAMP2;PSMD1;ENPP4;B2M;GOLGA7;ATP6V1D;CD53;ATP8B4;TICAM2;RAB27A;OLFM4;PTPRC;TCN1;RAB37;PSMC2;RAB18;PPIE;DEGS1;CD47;LAMTOR3;NIT2;PAFAH1B2		.	NF-kappa B signaling pathway	5/95	0.0950233	0.680632	2.06804	TICAM2;BCL2A1;LY96;TNFSF13B;BIRC3
	non-canonical Wnt signaling pathway (GO:0035567)	15/127	8.45727e-07	0.000100366	4.64087	PSMD12;PSMD14;PSMA6;PSMA3;PSMD7;PSMA4;PSMC6;PSMA1;PSMD5;PSME4;PSMB1;PSMC2;PSME1;PSMD1;PSME2		.	mTOR signaling pathway	7/152	0.0939442	0.688924	1.80953	ATP6V1G1;RHEB;ATP6V1E1;ATP6V1D;EIF4E;LAMTOR3;LAMTOR5
	neutrophil activation involved in immune response (GO:0002283)	32/483	9.08781e-07	0.000105398	2.60325	ASAH1;PSMD12;PSMD14;COPB1;PTPRJ;SRP14;CTSS;GLIPR1;PSMD7;PSMB1;LAMP2;PSMD1;ENPP4;B2M;GOLGA7;ATP6V1D;CD53;ATP8B4;TICAM2;RAB27A;OLFM4;PTPRC;TCN1;RAB37;PSMC2;RAB18;PPIE;DEGS1;CD47;LAMTOR3;NIT2;PAFAH1B2		.	RIG-I-like receptor signaling pathway	4/70	0.102897	0.704271	2.2453	IFIH1;CXCL10;CASP8;TANK
	neutrophil mediated immunity (GO:0002446)	32/487	1.08613e-06	0.000123168	2.58186	ASAH1;PSMD12;PSMD14;COPB1;PTPRJ;SRP14;CTSS;GLIPR1;PSMD7;PSMB1;LAMP2;PSMD1;ENPP4;B2M;GOLGA7;ATP6V1D;CD53;ATP8B4;TICAM2;RAB27A;OLFM4;PTPRC;TCN1;RAB37;PSMC2;RAB18;PPIE;DEGS1;CD47;LAMTOR3;NIT2;PAFAH1B2		.	Phagosome	7/152	0.0939442	0.705727	1.80953	ATP6V1G1;FCGR3A;CLEC7A;LAMP2;ATP6V1E1;ATP6V1D;CTSS
	protein ubiquitination (GO:0016567)	32/506	2.45613e-06	0.00027247	2.48492	PSMD12;CUL5;PSMD14;CUL2;IPP;TANK;HERC5;HERC4;NUB1;PSMD7;PSMD5;PSMB1;PSMD1;HERC6;ARRDC4;WSB1;DTX3L;BFAR;KLHL9;PSMA6;PSMA3;ITCH;PSMA4;PSMC6;PSMA1;PSME4;PSMC2;PSME1;PSME2;ERCC8;UBE2V1;BIRC3		.	Sphingolipid metabolism	3/47	0.117197	0.736666	2.50805	UGCG;ASAH1;DEGS1
	post-translational protein modification (GO:0043687)	25/357	5.49049e-06	0.000596128	2.75159	PSMD12;CUL5;PSMD14;CUL2;NUB1;DCAF17;PSMD7;PSMD5;PSMB1;PSMD1;DCAF13;WSB1;RABGGTB;KLHL9;COPS4;PSMA6;PSMA3;PSMA4;PSMC6;PSMA1;PSME4;PSMC2;PSME1;PSME2;ERCC8		.	Ether lipid metabolism	3/47	0.117197	0.752013	2.50805	LPCAT2;PLA2G4A;PAFAH1B2
	negative regulation of canonical Wnt signaling pathway (GO:0090090)	15/148	5.84541e-06	0.00062144	3.98237	PSMD12;PSMD14;PSMA6;PSMA3;PSMD7;PSMA4;PSMC6;PSMA1;PSMD5;PSME4;PSMB1;PSMC2;PSME1;PSMD1;PSME2		.	Proximal tubule bicarbonate reclamation	2/23	0.115234	0.755152	3.41676	MDH1;ATP1B3
	ubiquitin-dependent protein catabolic process (GO:0006511)	24/341	7.75726e-06	0.000807863	2.76547	PSMD12;CUL5;PSMD14;DTX3L;CUL2;BFAR;PSMA6;NUB1;PSMA3;ITCH;PSMD7;PSMA4;PSMC6;PSMA1;PSMD5;PSME4;PSMB1;PSMC2;PSME1;PSMD1;PSME2;PLAA;ERCC8;FBXO8		.	Protein export	2/23	0.115234	0.771569	3.41676	SRP14;SRP9
	antigen receptor-mediated signaling pathway (GO:0050851)	20/257	1.03322e-05	0.0010545	3.0578	PSMD12;FYB1;PSMD14;PTPRJ;PSMA6;PSMA3;PSMD7;PSMA4;PSMC6;PTPRC;PSMA1;PSMD5;PSME4;PSMB1;PSMC2;PSME1;PSMD1;PSME2;UBE2V1;CD247		.	Toll-like receptor signaling pathway	5/104	0.126209	0.777448	1.88907	CXCL10;TICAM2;CASP8;STAT1;LY96
	proteasomal protein catabolic process (GO:0010498)	19/237	1.12554e-05	0.0011262	3.15005	PSMD12;PSMD14;BFAR;PSMA6;PSMA3;ITCH;PSMD7;PSMA4;PSMC6;PSMA1;PSMD5;PSME4;PSMB1;PSMC2;PSME1;PSMD1;PSME2;PLAA;ERCC8		.	Antigen processing and presentation	4/77	0.132912	0.802681	2.04118	PSME1;PSME2;B2M;CTSS
	DNA repair (GO:0006281)	21/288	1.68219e-05	0.00165081	2.86509	DCLRE1A;MRE11;DTX3L;RMI1;ERCC6L2;USP3;XPA;GTF2H1;PARP9;INIP;ALKBH3;POLB;RAD50;RAD51C;NSMCE4A;PSME4;USP1;ERCC8;UBE2V1;TOPBP1;MNAT1		.	Fanconi anemia pathway	3/54	0.158157	0.936777	2.18293	RAD51C;RMI1;USP1
	Fc-epsilon receptor signaling pathway (GO:0038095)	16/182	1.77447e-05	0.00170851	3.45431	PSMD12;PSMD14;PSMA6;PSMA3;PSMD7;PSMA4;PSMC6;PSMA1;PSMD5;PSME4;PSMB1;PSMC2;PSME1;PSMD1;PSME2;UBE2V1		.	Thyroid hormone signaling pathway	5/116	0.173995	1	1.69365	RHEB;STAT1;ATP1B3;PRKACB;MED17
	Fc receptor signaling pathway (GO:0038093)	16/183	1.89975e-05	0.00179527	3.43543	PSMD12;PSMD14;PSMA6;PSMA3;PSMD7;PSMA4;PSMC6;PSMA1;PSMD5;PSME4;PSMB1;PSMC2;PSME1;PSMD1;PSME2;UBE2V1		.	Sulfur relay system	1/8	0.186388	1	4.91159	MOCS2
	proteasomal ubiquitin-independent protein catabolic process (GO:0010499)	6/24	2.4034e-05	0.00222992	9.82318	PSMA6;PSMA3;PSMA4;PSMA1;PSME4;PSMB1		.	Propanoate metabolism	2/32	0.195438	1	2.4558	SUCLG2;DLD
	cytokine-mediated signaling pathway (GO:0019221)	34/633	3.78858e-05	0.00345235	2.11051	PSMD12;PSMD14;IFIT1;TANK;IFIT3;TNFSF13B;IFIT2;PSMD7;PSMD5;PSMB1;PSMD1;CCR5;B2M;HSPA9;ANXA1;RSAD2;STAT1;STAT2;MX2;PSMA6;CXCL10;PSMA3;PSMA4;PSMC6;PSMA1;PSME4;PSMC2;IL2RB;PSME1;PSME2;FAS;TRIM38;UBE2V1;BIRC3		.	Ribosome	6/153	0.195653	1	1.54089	MRPL3;MRPL1;MRPS21;RPS27L;MRPL13;MRPS18C
	negative regulation of Wnt signaling pathway (GO:0030178)	15/174	4.05551e-05	0.00356815	3.3873	PSMD12;PSMD14;PSMA6;PSMA3;PSMD7;PSMA4;PSMC6;PSMA1;PSMD5;PSME4;PSMB1;PSMC2;PSME1;PSMD1;PSME2		.	Kaposi sarcoma-associated herpesvirus infection	7/186	0.196905	1	1.47876	GABARAPL1;CASP8;STAT1;STAT2;CYCS;FAS;CCR5
	cellular response to DNA damage stimulus (GO:0006974)	22/329	4.02381e-05	0.00360237	2.62748	MRE11;CUL5;DTX3L;BCL2A1;USP3;TAF9;XPA;GTF2H1;TANK;CDKN2AIP;INIP;ALKBH3;POLB;ETAA1;RAD50;RAD51C;NSMCE4A;PSME4;ERCC8;CEP63;TOPBP1;MNAT1		.	Rheumatoid arthritis	4/91	0.201743	1	1.72715	ATP6V1G1;ATP6V1E1;ATP6V1D;TNFSF13B
	positive regulation of rRNA processing (GO:2000234)	4/9	4.71902e-05	0.00401352	17.4634	UTP15;WDR75;RIOK2;WDR43		.	Base excision repair	2/33	0.204764	1	2.38138	POLB;POLE3
	positive regulation of ribosome biogenesis (GO:0090070)	4/9	4.71902e-05	0.00408155	17.4634	UTP15;WDR75;RIOK2;WDR43		.	Autophagy	5/128	0.227517	1	1.53487	GABARAPL1;RHEB;LAMP2;PRKACB;EIF2S1
	DNA metabolic process (GO:0006259)	21/314	5.9816e-05	0.00500395	2.62786	MRE11;RMI1;PTGES3;USP3;XPA;GTF2H1;INIP;ALKBH3;POLB;ORC4;RAD50;RAD51C;NSMCE4A;DBF4;PSME4;ORC2;POLE3;SMARCAD1;TOPBP1;MCM6;MNAT1		.	Natural killer cell mediated cytotoxicity	5/131	0.241599	1	1.49972	FCGR3A;TNFSF10;FAS;CD48;CD247
	proteasome-mediated ubiquitin-dependent protein catabolic process (GO:0043161)	20/291	6.12157e-05	0.00503845	2.70053	PSMD12;PSMD14;BFAR;PSMA6;PSMA3;ITCH;PSMD7;PSMA4;PSMC6;PSMA1;PSMD5;JKAMP;PSME4;PSMB1;PSMC2;PSME1;PSMD1;PSME2;PLAA;ERCC8		.	African trypanosomiasis	2/37	0.242459	1	2.12393	FAS;IDO1
	G1/S transition of mitotic cell cycle (GO:0000082)	11/105	7.51303e-05	0.00608556	4.11638	NPAT;ORC4;DBF4;CUL5;CCNH;CUL2;ORC2;POLE3;MCM6;MNAT1;EIF4E		.	Epithelial cell signaling in Helicobacter pylori infection	3/68	0.249795	1	1.7335	ATP6V1G1;ATP6V1E1;ATP6V1D
	mitochondrion organization (GO:0007005)	14/167	9.83132e-05	0.00783894	3.294	TOMM70;PNPT1;ALAS1;BCL2A1;MX2;TIMM23;IFIT2;RHOT1;OPA1;TFAM;CYCS;MTERF1;SSBP1;DNM1L		.	C-type lectin receptor signaling pathway	4/104	0.272978	1	1.51126	CASP8;CLEC7A;STAT1;STAT2
	MAPK cascade (GO:0000165)	19/278	0.000100037	0.0078537	2.68547	YWHAE;PSMD12;PSMD14;PSMA6;PSMA3;PSMD7;PSMA4;PSMC6;PSMA1;PSMD5;PSME4;PSMB1;PSMC2;IL2RB;PSME1;PSMD1;PSME2;CCR5;LAMTOR3		.	p53 signaling pathway	3/72	0.277374	1	1.6372	CASP8;FAS;CYCS
	activation of cysteine-type endopeptidase activity involved in apoptotic signaling pathway (GO:0097296)	4/11	0.000118673	0.00890569	14.2883	CASP8;TNFSF10;FAS;TANK		.	PPAR signaling pathway	3/74	0.291276	1	1.59295	ACSL5;DBI;ACSL4
	cell cycle G1/S phase transition (GO:0044843)	10/92	0.000116226	0.0089864	4.27095	ORC4;DBF4;CUL5;CCNH;CUL2;ORC2;POLE3;MCM6;MNAT1;EIF4E		.	Human immunodeficiency virus 1 infection	7/212	0.295853	1	1.2974	CASP8;CUL5;FAS;CYCS;CD247;CCR5;B2M
	regulation of canonical Wnt signaling pathway (GO:0060828)	16/213	0.000118344	0.00901359	2.95157	USP8;PSMD12;PSMD14;PSMA6;PSMA3;PSMD7;PSMA4;PSMC6;PSMA1;PSMD5;PSME4;PSMB1;PSMC2;PSME1;PSMD1;PSME2		.	Fatty acid degradation	2/44	0.308801	1	1.78603	ACSL5;ACSL4
	translational termination (GO:0006415)	10/96	0.000166097	0.0122839	4.09299	MRPL3;MRPL1;MRPS31;MRPS21;MRPL47;ABCE1;CHCHD1;MRPL13;MRPS18C;MRPL44		.	Vasopressin-regulated water reabsorption	2/44	0.308801	1	1.78603	DCTN6;PRKACB
	regulation of rRNA processing (GO:2000232)	4/12	0.000174434	0.0127162	13.0976	UTP15;WDR75;RIOK2;WDR43		.	Synaptic vesicle cycle	3/78	0.3192	1	1.51126	ATP6V1G1;ATP6V1E1;ATP6V1D
	positive regulation of RNA metabolic process (GO:0051254)	6/35	0.000228604	0.0164305	6.7359	UTP15;PNPT1;WDR75;NMD3;RIOK2;WDR43		.	Human papillomavirus infection	10/330	0.332185	1	1.19069	ATP6V1G1;CASP8;STAT1;RHEB;PPP2R3C;STAT2;FAS;ATP6V1E1;PRKACB;ATP6V1D
	regulation of proteolysis involved in cellular protein catabolic process (GO:1903050)	5/23	0.000240955	0.0170777	8.5419	USP14;PSMD14;PSME1;PSME2;UCHL5		.	Cysteine and methionine metabolism	2/47	0.336957	1	1.67203	MDH1;KYAT3
	DNA replication (GO:0006260)	11/120	0.000248802	0.0173923	3.60183	POLB;ORC4;RAD50;MRE11;DBF4;RMI1;ORC2;POLE3;MCMBP;TOPBP1;MCM6		.	Endocrine and other factor-regulated calcium reabsorption	2/48	0.346269	1	1.6372	ATP1B3;PRKACB
	mitochondrial translational elongation (GO:0070125)	9/87	0.000368291	0.0253972	4.06477	MRPL3;MRPL1;MRPS31;MRPS21;MRPL47;CHCHD1;MRPL13;MRPS18C;MRPL44		.	Human cytomegalovirus infection	7/225	0.348967	1	1.22244	CASP8;RHEB;FAS;CYCS;CCR5;B2M;PRKACB
	mitochondrial translation (GO:0032543)	10/107	0.000403647	0.0274641	3.67222	MRPL3;MRPL1;MRPS31;MRPS21;MRPL47;IARS2;CHCHD1;MRPL13;MRPS18C;MRPL44		.	Selenocompound metabolism	1/17	0.35495	1	2.31134	KYAT3
	regulation of proteasomal protein catabolic process (GO:0061136)	6/39	0.00042164	0.0283109	6.04504	USP14;PSMD14;GLMN;PSME1;PSME2;UCHL5		.	Ovarian steroidogenesis	2/49	0.355537	1	1.60378	PLA2G4A;PRKACB
	mitochondrial translational termination (GO:0070126)	9/89	0.000436439	0.028924	3.97342	MRPL3;MRPL1;MRPS31;MRPS21;MRPL47;CHCHD1;MRPL13;MRPS18C;MRPL44		.	Herpes simplex virus 1 infection	14/492	0.373109	1	1.11809	STAT1;STAT2;EIF2S1;SRPK1;IFIH1;CASP8;RHEB;ZNF527;ZNF569;FAS;CYCS;ZNF677;B2M;BIRC3
	positive regulation of cysteine-type endopeptidase activity involved in apoptotic signaling pathway (GO:2001269)	4/15	0.000452658	0.0296143	10.4781	CASP8;TNFSF10;FAS;TANK		.	Lysosome	4/123	0.382383	1	1.27781	MFSD8;ASAH1;LAMP2;CTSS
	tRNA aminoacylation (GO:0043039)	6/40	0.00048551	0.0313615	5.89391	PPA1;RARS;TARS;SARS;IARS2;WARS2		.	One carbon pool by folate	1/20	0.402999	1	1.96464	ATIC
	transcription-coupled nucleotide-excision repair (GO:0006283)	8/73	0.00052489	0.0334814	4.30605	COPS4;CCNH;XPA;PPIE;ERCC8;GTF2H1;MNAT1;POLR2K		.	Fc gamma R-mediated phagocytosis	3/91	0.409434	1	1.29536	FCGR3A;PTPRC;PLA2G4A
	mitotic cell cycle phase transition (GO:0044772)	15/221	0.000565374	0.0356185	2.66693	YWHAE;BORA;CUL5;CCNH;CUL2;HAUS3;ORC4;DBF4;CEP70;ORC2;POLE3;CEP63;MCM6;MNAT1;EIF4E		.	Legionellosis	2/55	0.410035	1	1.42883	CASP8;CYCS
	transcription elongation from RNA polymerase I promoter (GO:0006362)	5/28	0.00063371	0.0394368	7.01656	CCNH;TAF1A;GTF2H1;MNAT1;POLR2K		.	Th1 and Th2 cell differentiation	3/92	0.416257	1	1.28128	STAT1;IL2RB;CD247
	regulation of transcription from RNA polymerase I promoter (GO:0006356)	4/17	0.000757985	0.0455058	9.24535	UTP15;WDR75;WDR43;POLR2K		.	IL-17 signaling pathway	3/93	0.423055	1	1.26751	USP25;CXCL10;CASP8
	transmembrane transport (GO:0055085)	21/378	0.000740564	0.0455313	2.18293	ATP6V1G1;PSMD12;PSMD14;ATP1B3;EIF2S1;PSMA6;PSMA3;PSMD7;PSMA4;PSMC6;PSMA1;PSMD5;PSME4;PSMB1;PSMC2;PSME1;PSMD1;PSME2;SGK3;ATP6V1E1;ATP6V1D		.	Other types of O-glycan biosynthesis	1/22	0.43303	1	1.78603	GXYLT1
	TRIF-dependent toll-like receptor signaling pathway (GO:0035666)	5/29	0.000749871	0.0455547	6.77461	CASP8;TICAM2;LY96;TANK;BIRC3		.	Terpenoid backbone biosynthesis	1/22	0.43303	1	1.78603	FNTA
	MyD88-independent toll-like receptor signaling pathway (GO:0002756)	5/30	0.000881219	0.052289	6.54879	CASP8;TICAM2;LY96;TANK;BIRC3		.	FoxO signaling pathway	4/132	0.434004	1	1.19069	GABARAPL1;HOMER1;TNFSF10;SGK3
	mitochondrial gene expression (GO:0140053)	6/45	0.000925523	0.0542867	5.23903	PNPT1;MRPS21;TFAM;IARS2;MRPL47;MRPS18C		.	Lysine degradation	2/59	0.445092	1	1.33196	PRDM9;DLD
	termination of RNA polymerase I transcription (GO:0006363)	5/31	0.00102895	0.0596673	6.33754	CCNH;TAF1A;GTF2H1;MNAT1;POLR2K		.	Viral myocarditis	2/59	0.445092	1	1.33196	CASP8;CYCS
	tRNA aminoacylation for protein translation (GO:0006418)	6/46	0.00104181	0.0597342	5.12514	PPA1;RARS;TARS;SARS;IARS2;WARS2		.	Spliceosome	4/134	0.445329	1	1.17292	SF3A3;LSM8;PPIE;LSM5
	7-methylguanosine RNA capping (GO:0009452)	5/32	0.00119428	0.0669717	6.13949	CCNH;GTF2H1;MNAT1;POLR2K;CMTR2		.	Mismatch repair	1/23	0.447475	1	1.70838	SSBP1
	dynamin family protein polymerization involved in mitochondrial fission (GO:0003374)	3/9	0.00122762	0.0673609	13.0976	OPA1;MX2;DNM1L		.	Steroid hormone biosynthesis	2/60	0.453674	1	1.30976	HSD11B1;HSD17B12
	7-methylguanosine mRNA capping (GO:0006370)	5/32	0.00119428	0.0677158	6.13949	CCNH;GTF2H1;MNAT1;POLR2K;CMTR2		.	Glycosylphosphatidylinositol (GPI)-anchor biosynthesis	1/25	0.475273	1	1.57171	PIGH
	dynamin family protein polymerization involved in membrane fission (GO:0003373)	3/9	0.00122762	0.0680931	13.0976	OPA1;MX2;DNM1L		.	alpha-Linolenic acid metabolism	1/25	0.475273	1	1.57171	PLA2G4A
	type I interferon signaling pathway (GO:0060337)	7/65	0.00129096	0.0693448	4.23152	RSAD2;STAT1;MX2;STAT2;IFIT1;IFIT3;IFIT2		.	Arachidonic acid metabolism	2/63	0.478957	1	1.24739	PTGES3;PLA2G4A
	cellular response to type I interferon (GO:0071357)	7/65	0.00129096	0.0700825	4.23152	RSAD2;STAT1;MX2;STAT2;IFIT1;IFIT3;IFIT2		.	Cytosolic DNA-sensing pathway	2/63	0.478957	1	1.24739	CXCL10;POLR2K
	transcription from RNA polymerase I promoter (GO:0006360)	5/33	0.00137847	0.0725188	5.95344	CCNH;TAF1A;GTF2H1;MNAT1;POLR2K		.	Longevity regulating pathway	3/102	0.48284	1	1.15567	RHEB;PRKACB;EIF4E
	transcription initiation from RNA polymerase I promoter (GO:0006361)	5/33	0.00137847	0.0732742	5.95344	CCNH;TAF1A;GTF2H1;MNAT1;POLR2K		.	Human T-cell leukemia virus 1 infection	6/219	0.48542	1	1.07651	POLB;IL2RB;VDAC3;SLC25A5;B2M;PRKACB
	mitochondrial RNA metabolic process (GO:0000959)	4/20	0.00145246	0.0748676	7.85855	PNPT1;TRMT10C;TFAM;MTERF1		.	Folate biosynthesis	1/26	0.488644	1	1.51126	MOCS2
	translational elongation (GO:0006414)	9/105	0.00144402	0.0751921	3.36795	MRPL3;MRPL1;MRPS31;MRPS21;MRPL47;CHCHD1;MRPL13;MRPS18C;MRPL44		.	Chagas disease (American trypanosomiasis)	3/103	0.489306	1	1.14445	CASP8;FAS;CD247
	regulation of cytokine-mediated signaling pathway (GO:0001959)	8/90	0.00208044	0.106165	3.49269	CASP8;PTPRC;STAT1;STAT2;SPPL2A;ABCE1;TANK;BIRC3		.	Biosynthesis of unsaturated fatty acids	1/27	0.501675	1	1.45529	HSD17B12
	STAT cascade (GO:0097696)	4/22	0.00210643	0.106427	7.14413	STAT1;STAT2;NMI;STAMBP		.	Fatty acid elongation	1/27	0.501675	1	1.45529	HSD17B12
	protein peptidyl-prolyl isomerization (GO:0000413)	5/37	0.00232922	0.115398	5.30983	PPWD1;PPIE;PPIG;CWC27;FKBP3		.	Th17 cell differentiation	3/107	0.51476	1	1.10167	STAT1;IL2RB;CD247
	proteasome assembly (GO:0043248)	3/11	0.00232149	0.116143	10.7162	PSMD5;POMP;PSMG2		.	Retrograde endocannabinoid signaling	4/148	0.522268	1	1.06197	NDUFB5;NDUFB3;NDUFV2;PRKACB
	response to cytokine (GO:0034097)	10/138	0.00283095	0.137584	2.8473	CD274;NUB1;CASP8;CALCOCO2;STAT1;YTHDC2;KYNU;MX2;TAF9;PTPN12		.	Linoleic acid metabolism	1/29	0.526751	1	1.35492	PLA2G4A
	negative regulation of intracellular signal transduction (GO:1902532)	11/161	0.00282175	0.138456	2.6846	URI1;CASP8;BCL2A1;STAT1;PLEK;RHOH;PTPRJ;STAMBP;ZMYND11;TANK;ARHGAP12		.	Adipocytokine signaling pathway	2/69	0.527303	1	1.13892	ACSL5;ACSL4
	DNA replication initiation (GO:0006270)	4/24	0.00293939	0.140184	6.54879	ORC4;POLE3;ORC2;TOPBP1		.	Renal cell carcinoma	2/69	0.527303	1	1.13892	FH;CUL2
	DNA-dependent DNA replication (GO:0006261)	6/56	0.00291708	0.140433	4.20994	POLB;ORC4;ORC2;POLE3;MCMBP;TOPBP1		.	Chemokine signaling pathway	5/190	0.532842	1	1.03402	CXCL10;STAT1;STAT2;CCR5;PRKACB
	positive regulation of T cell cytokine production (GO:0002726)	3/12	0.00303718	0.140898	9.82318	RSAD2;TANK;B2M		.	Adherens junction	2/72	0.550312	1	1.09146	PTPRJ;SSX2IP
	positive regulation of peptidase activity (GO:0010952)	3/12	0.00303718	0.14219	9.82318	PSME1;PSME2;TANK		.	Bile secretion	2/72	0.550312	1	1.09146	ATP1B3;PRKACB
	mitochondrion transport along microtubule (GO:0047497)	3/12	0.00303718	0.143507	9.82318	RHOT1;OPA1;LRPPRC		.	RNA polymerase	1/31	0.550567	1	1.26751	POLR2K
	protein localization to organelle (GO:0033365)	8/97	0.00332605	0.151543	3.24064	IFT20;SSB;CNEP1R1;XPA;GCC2;SNX10;ATP6V1D;BBS4		.	Glutamatergic synapse	3/114	0.557612	1	1.03402	HOMER1;PLA2G4A;PRKACB
	peptidyl-proline modification (GO:0018208)	5/40	0.00330346	0.15187	4.91159	PPWD1;PPIE;PPIG;CWC27;FKBP3		.	Leishmaniasis	2/74	0.565209	1	1.06197	FCGR3A;STAT1
	long-chain fatty-acyl-CoA metabolic process (GO:0035336)	4/25	0.00342979	0.154887	6.28684	ACSL5;ACSL4;HSD17B12;FAR2		.	Thyroid hormone synthesis	2/74	0.565209	1	1.06197	ATP1B3;PRKACB
	regulation of necrotic cell death (GO:0010939)	3/13	0.00387427	0.173425	9.06755	CASP8;TANK;BIRC3		.	Gastric acid secretion	2/75	0.572523	1	1.04781	ATP1B3;PRKACB
	strand displacement (GO:0000732)	4/26	0.00397297	0.174776	6.04504	RAD50;MRE11;RAD51C;RMI1		.	Pertussis	2/76	0.579747	1	1.03402	TICAM2;LY96
	activation of cysteine-type endopeptidase activity involved in apoptotic process (GO:0006919)	7/79	0.00396755	0.176056	3.48163	CASP8;CASP4;TNFSF10;RPS27L;FAS;CYCS;TANK		.	SNARE interactions in vesicular transport	1/34	0.584068	1	1.15567	STX8
	protein catabolic process (GO:0030163)	7/81	0.00455795	0.198797	3.39567	PSMA6;PSMA3;PSMA4;PSMA1;LAMP2;PSMB1;PGA5		.	Sphingolipid signaling pathway	3/119	0.586791	1	0.990573	ASAH1;PPP2R3C;DEGS1
	necroptotic process (GO:0070266)	3/14	0.00483851	0.209245	8.41987	TICAM2;LY96;DNM1L		.	Endocytosis	6/244	0.590957	1	0.966215	USP8;ITCH;IL2RB;STAMBP;CCR5;VPS36
	protein K63-linked deubiquitination (GO:0070536)	4/28	0.00522777	0.224179	5.61325	USP25;USP8;PSMD14;STAMBP		.	Cardiac muscle contraction	2/78	0.593926	1	1.00751	COX7B;ATP1B3
	nucleotide-excision repair, preincision complex assembly (GO:0006294)	4/29	0.00594423	0.25069	5.41969	CCNH;XPA;GTF2H1;MNAT1		.	Alanine, aspartate and glutamate metabolism	1/35	0.594671	1	1.12265	NIT2
	regulation of response to external stimulus (GO:0032101)	8/107	0.00602656	0.252078	2.93777	HERC5;PSMA6;USP14;ANXA1;FNTA;CASP4;PIK3AP1;BIRC3		.	Prion diseases	1/35	0.594671	1	1.12265	PRKACB
	toll-like receptor 4 signaling pathway (GO:0034142)	3/15	0.00593498	0.252385	7.85855	TICAM2;LY96;PIK3AP1		.	RNA transport	4/165	0.608234	1	0.952551	NMD3;EIF2S1;EIF4E;NUP37
	DNA-templated transcription, elongation (GO:0006354)	8/108	0.00636803	0.259969	2.91057	GTF2A2;CCNH;GTF2B;TAF9;TAF1A;GTF2H1;MNAT1;POLR2K		.	Aldosterone-regulated sodium reabsorption	1/37	0.615076	1	1.06197	ATP1B3
	nucleotide-excision repair (GO:0006289)	8/108	0.00636803	0.262065	2.91057	COPS4;CCNH;XPA;PPIE;ERCC8;GTF2H1;MNAT1;POLR2K		.	Primary immunodeficiency	1/37	0.615076	1	1.06197	PTPRC
	toll-like receptor signaling pathway (GO:0002224)	7/86	0.00632285	0.262321	3.19825	CASP8;TICAM2;CD180;LY96;PIK3AP1;CTSS;BIRC3		.	Chemical carcinogenesis	2/82	0.621202	1	0.958359	HSD11B1;KYAT3
	regulation of defense response to virus by host (GO:0050691)	4/30	0.00672316	0.268034	5.23903	DTX3L;STAT1;IFIT1;PARP9		.	Allograft rejection	1/38	0.62489	1	1.03402	FAS
	translation (GO:0006412)	13/232	0.00669131	0.268864	2.20175	MRPS21;SARS;TARS;MRPL47;MRPL13;MRPS18C;WARS2;MRPL3;MRPL1;PPA1;RARS;IARS2;ABCE1		.	Osteoclast differentiation	3/127	0.630842	1	0.928175	FCGR3A;STAT1;STAT2
	negative regulation of I-kappaB kinase/NF-kappaB signaling (GO:0043124)	5/47	0.00666124	0.26978	4.18008	CASP8;STAT1;RHOH;ZMYND11;TANK		.	Purine metabolism	3/129	0.641334	1	0.913784	ATIC;AK3;ENPP4
	programmed necrotic cell death (GO:0097300)	3/16	0.0071681	0.279228	7.36739	TICAM2;LY96;DNM1L		.	Insulin secretion	2/86	0.647043	1	0.913784	ATP1B3;PRKACB
	regulation of necroptotic process (GO:0060544)	3/16	0.0071681	0.281376	7.36739	CASP8;TANK;BIRC3		.	Graft-versus-host disease	1/41	0.65286	1	0.958359	FAS
	regulation of protein homodimerization activity (GO:0043496)	3/16	0.0071681	0.283557	7.36739	SYAP1;AIDA;TANK		.	Porphyrin and chlorophyll metabolism	1/42	0.661713	1	0.935541	ALAS1
	cofactor biosynthetic process (GO:0051188)	4/31	0.00756675	0.288158	5.07003	HSPA9;SLC25A16;MOCS2;MMADHC		.	GABAergic synapse	2/89	0.665494	1	0.882983	GABARAPL1;PRKACB
	positive regulation of viral genome replication (GO:0045070)	4/31	0.00756675	0.290324	5.07003	YTHDC2;PPIE;IFIT1;SRPK1		.	Type I diabetes mellitus	1/43	0.67034	1	0.913784	FAS
	negative regulation of extrinsic apoptotic signaling pathway via death domain receptors (GO:1902042)	4/31	0.00756675	0.292524	5.07003	CASP8;TNFSF10;FAS;TANK		.	Protein digestion and absorption	2/90	0.671469	1	0.873172	ATP1B3;PGA5
	protein autoubiquitination (GO:0051865)	5/49	0.00794569	0.300347	4.00946	ITCH;DTX3L;ERCC8;BFAR;TANK		.	Salivary secretion	2/90	0.671469	1	0.873172	ATP1B3;PRKACB
	regulation of innate immune response (GO:0045088)	6/69	0.00817436	0.306719	3.41676	GBP5;STAT1;STAT2;PARP9;ABCE1;BIRC3		.	Carbohydrate digestion and absorption	1/44	0.678748	1	0.893017	ATP1B3
	serine family amino acid metabolic process (GO:0009069)	3/17	0.0085417	0.315857	6.93401	SRR;SARS;SLC25A32		.	Apelin signaling pathway	3/137	0.681183	1	0.860425	GABARAPL1;TFAM;PRKACB
	positive regulation of transcription initiation from RNA polymerase II promoter (GO:0060261)	3/17	0.0085417	0.318163	6.93401	PSMC6;GTF2B;PSMC2		.	Insulin signaling pathway	3/137	0.681183	1	0.860425	RHEB;PRKACB;EIF4E
	mitochondrial RNA processing (GO:0000963)	2/6	0.00905967	0.323297	13.0976	PNPT1;TRMT10C		.	GnRH signaling pathway	2/93	0.688877	1	0.845005	PLA2G4A;PRKACB
	protein geranylgeranylation (GO:0018344)	2/6	0.00905967	0.325574	13.0976	FNTA;RABGGTB		.	Small cell lung cancer	2/93	0.688877	1	0.845005	CYCS;BIRC3
	pyrimidine deoxyribonucleotide biosynthetic process (GO:0009221)	2/6	0.00905967	0.327883	13.0976	HDDC2;CMPK2		.	Hedgehog signaling pathway	1/47	0.702709	1	0.836016	PRKACB
	alpha-beta T cell activation (GO:0046631)	2/6	0.00905967	0.330225	13.0976	ANXA1;RSAD2		.	Calcium signaling pathway	4/188	0.708213	1	0.836016	VDAC3;SLC25A5;PRKACB;MCU
	cellular protein modification process (GO:0006464)	38/1001	0.00933066	0.330655	1.49163	PSMD12;CUL5;PSMD14;CUL2;DUSP11;HERC5;NUB1;DCAF17;PSMD7;PSMD5;PSMB1;PSMD1;NEK3;PRKACB;DCAF13;USP25;WSB1;FYB1;ANXA1;VRK1;PTPN12;RABGGTB;SRPK1;COPS4;KLHL9;PSMA6;PSMA3;PSMA4;PSMC6;PTPRC;PSMA1;PSME4;PSMC2;PSME1;PSME2;ERCC8;SGK3;PIGH		.	Intestinal immune network for IgA production	1/48	0.710293	1	0.818599	TNFSF13B
	establishment of mitochondrion localization, microtubule-mediated (GO:0034643)	2/6	0.00905967	0.332601	13.0976	RHOT1;LRPPRC		.	Notch signaling pathway	1/48	0.710293	1	0.818599	DTX3L
	regulation of macroautophagy (GO:0016241)	8/116	0.00965247	0.337373	2.70984	IFT20;ATP6V1G1;RHEB;ATP6V1E1;ATP6V1D;LAMTOR3;PAFAH1B2;LAMTOR5		.	Valine, leucine and isoleucine degradation	1/48	0.710293	1	0.818599	DLD
	proteolysis involved in cellular protein catabolic process (GO:0051603)	7/93	0.00958909	0.33747	2.95752	PSMA6;PSMA3;CASP8;PSMA4;PSMA1;PSMB1;CTSS		.	Glycerophospholipid metabolism	2/97	0.710899	1	0.810159	LPCAT2;PLA2G4A
	mitotic recombination (GO:0006312)	3/18	0.010059	0.346833	6.54879	RAD50;RAD51C;NSMCE2		.	Aldosterone synthesis and secretion	2/98	0.716197	1	0.801892	ATP1B3;PRKACB
	double-strand break repair (GO:0006302)	9/141	0.0101332	0.347044	2.50805	DCLRE1A;RAD50;MRE11;RAD51C;PSMD14;DTX3L;NSMCE2;SMARCAD1;PARP9		.	Adrenergic signaling in cardiomyocytes	3/145	0.71765	1	0.812953	PPP2R3C;ATP1B3;PRKACB
	long-chain fatty-acyl-CoA biosynthetic process (GO:0035338)	3/18	0.010059	0.349192	6.54879	ACSL5;ACSL4;HSD17B12		.	Cocaine addiction	1/49	0.717684	1	0.801892	PRKACB
	RNA processing (GO:0006396)	11/193	0.010725	0.362448	2.23948	SF3A3;DUSP11;PNPT1;RSRC1;YTHDC2;XRN2;ZCRB1;PPIG;LSM5;SRPK1;MRPL44		.	Malaria	1/49	0.717684	1	0.801892	GYPC
	transcription elongation from RNA polymerase II promoter (GO:0006368)	7/95	0.0107146	0.36451	2.89525	GTF2A2;CCNH;GTF2B;TAF9;GTF2H1;MNAT1;POLR2K		.	Choline metabolism in cancer	2/99	0.721413	1	0.793793	RHEB;PLA2G4A
	malate metabolic process (GO:0006108)	2/7	0.012471	0.385694	11.2265	FH;MDH1		.	Cholesterol metabolism	1/50	0.724886	1	0.785855	VDAC3
	regulation of protein deubiquitination (GO:0090085)	2/7	0.012471	0.388046	11.2265	ITCH;TANK		.	N-Glycan biosynthesis	1/50	0.724886	1	0.785855	ALG14
	purine ribonucleotide transport (GO:0015868)	2/7	0.012471	0.390426	11.2265	SLC25A16;SLC25A17		.	HIF-1 signaling pathway	2/100	0.726548	1	0.785855	CUL2;EIF4E
	telomere capping (GO:0016233)	3/19	0.0117228	0.39099	6.20412	DCLRE1A;RAD50;MRE11		.	Inflammatory mediator regulation of TRP channels	2/100	0.726548	1	0.785855	PLA2G4A;PRKACB
	positive regulation of response to stimulus (GO:0048584)	5/54	0.0118879	0.391379	3.63822	IFIH1;NSMCE4A;HOMER1;TAF9;CDKN2AIP		.	T cell receptor signaling pathway	2/101	0.731603	1	0.778074	PTPRC;CD247
	regulation by virus of viral protein levels in host cell (GO:0046719)	2/7	0.012471	0.392836	11.2265	STAT1;IFIT1		.	Amyotrophic lateral sclerosis (ALS)	1/51	0.731906	1	0.770446	CYCS
	DNA double-strand break processing (GO:0000729)	3/19	0.0117228	0.393562	6.20412	RAD50;MRE11;SMARCAD1		.	Mineral absorption	1/51	0.731906	1	0.770446	ATP1B3
	RNA modification (GO:0009451)	5/54	0.0118879	0.39392	3.63822	SSB;TRMT6;PARN;CDKAL1;LRPPRC		.	Autoimmune thyroid disease	1/53	0.745412	1	0.741372	FAS
	regulation of response to DNA damage stimulus (GO:2001020)	4/36	0.0128247	0.394245	4.36586	ETAA1;NSMCE4A;USP1;UBE2V1		.	Pathogenic Escherichia coli infection	1/55	0.75824	1	0.714413	LY96
	adenine nucleotide transport (GO:0051503)	2/7	0.012471	0.395276	11.2265	SLC25A16;SLC25A17		.	Regulation of lipolysis in adipocytes	1/55	0.75824	1	0.714413	PRKACB
	regulation of defense response (GO:0031347)	6/75	0.0120978	0.395738	3.14342	HERC5;PSMA6;ANXA1;CASP4;PIK3AP1;BIRC3		.	Cushing syndrome	3/155	0.758587	1	0.760504	USP8;FH;PRKACB
	tRNA 3'-end processing (GO:0042780)	2/7	0.012471	0.397747	11.2265	SSB;TRMT10C		.	Cytokine-cytokine receptor interaction	6/294	0.762151	1	0.801892	CXCL10;IL2RB;TNFSF10;FAS;CCR5;TNFSF13B
	death-inducing signaling complex assembly (GO:0071550)	2/7	0.012471	0.400248	11.2265	CASP8;TANK		.	Glutathione metabolism	1/56	0.764409	1	0.701656	TXNDC12
	oxaloacetate metabolic process (GO:0006107)	2/7	0.012471	0.402782	11.2265	MDH1;NIT2		.	Pyrimidine metabolism	1/57	0.770422	1	0.689346	CMPK2
	telomere maintenance via telomerase (GO:0007004)	3/20	0.0135352	0.40392	5.89391	RAD50;MRE11;PTGES3		.	VEGF signaling pathway	1/59	0.781992	1	0.665978	PLA2G4A
	negative regulation of MyD88-independent toll-like receptor signaling pathway (GO:0034128)	2/7	0.012471	0.405347	11.2265	TICAM2;LY96		.	JAK-STAT signaling pathway	3/162	0.784292	1	0.727643	STAT1;STAT2;IL2RB
	regulation of response to cytokine stimulus (GO:0060759)	3/20	0.0135352	0.406296	5.89391	IFIH1;TAF9;PARP9		.	Serotonergic synapse	2/113	0.786283	1	0.695447	PLA2G4A;PRKACB
	cellular macromolecule biosynthetic process (GO:0034645)	17/367	0.0133535	0.408041	1.8201	MRE11;RMI1;MRPS21;SARS;TARS;MRPL13;MRPS18C;ORC4;MRPL3;RAD50;MRPL1;DBF4;ORC2;POLE3;TOPBP1;MCM6;POLR2K		.	Long-term depression	1/60	0.787556	1	0.654879	PLA2G4A
	mitochondrial respiratory chain complex IV assembly (GO:0033617)	3/20	0.0135352	0.4087	5.89391	COX14;SMIM20;COA5		.	cGMP-PKG signaling pathway	3/166	0.797939	1	0.71011	VDAC3;ATP1B3;SLC25A5
	regulation of tumor necrosis factor-mediated signaling pathway (GO:0010803)	5/56	0.0137805	0.408849	3.50828	CASP8;SPPL2A;CASP4;TANK;BIRC3		.	PI3K-Akt signaling pathway	7/354	0.800005	1	0.776975	YWHAE;RHEB;PPP2R3C;IL2RB;SGK3;PIK3AP1;EIF4E
	positive regulation of interleukin-2 production (GO:0032743)	3/20	0.0135352	0.411132	5.89391	ANXA1;GLMN;TANK		.	Cortisol synthesis and secretion	1/65	0.813324	1	0.604504	PRKACB
	protein K63-linked ubiquitination (GO:0070534)	4/37	0.0140969	0.415818	4.24786	ITCH;BFAR;UBE2V1;TANK		.	Inflammatory bowel disease (IBD)	1/65	0.813324	1	0.604504	STAT1
	cellular respiration (GO:0045333)	5/57	0.0147987	0.43401	3.44673	FASTKD2;ETFRF1;CYCS;NDUFV2;COQ10B		.	AMPK signaling pathway	2/120	0.81345	1	0.654879	RHEB;PPP2R3C
	positive regulation of protein homodimerization activity (GO:0090073)	2/8	0.01635	0.436826	9.82318	SYAP1;TANK		.	Acute myeloid leukemia	1/66	0.81809	1	0.595344	BCL2A1
	fatty acid alpha-oxidation (GO:0001561)	2/8	0.01635	0.439125	9.82318	SLC25A17;PEX13		.	Long-term potentiation	1/67	0.822735	1	0.586459	PRKACB
	mitochondrial respiratory chain complex IV biogenesis (GO:0097034)	3/21	0.015498	0.439369	5.61325	COX14;SMIM20;COA5		.	Amphetamine addiction	1/68	0.827262	1	0.577834	PRKACB
	late endosome to vacuole transport via multivesicular body sorting pathway (GO:0032511)	2/8	0.01635	0.441449	9.82318	LEPROTL1;VPS36		.	Fc epsilon RI signaling pathway	1/68	0.827262	1	0.577834	PLA2G4A
	positive regulation of defense response to virus by host (GO:0002230)	3/21	0.015498	0.441824	5.61325	DTX3L;STAT1;PARP9		.	Glycolysis / Gluconeogenesis	1/68	0.827262	1	0.577834	DLD
	regulation of I-kappaB kinase/NF-kappaB signaling (GO:0043122)	11/204	0.0156868	0.442265	2.11873	TICAM2;CASP8;GOLT1B;STAT1;TNFSF10;RHOH;UBE2V1;TRIM38;ZMYND11;TANK;BIRC3		.	Staphylococcus aureus infection	1/68	0.827262	1	0.577834	FCGR3A
	kynurenine metabolic process (GO:0070189)	2/8	0.01635	0.443797	9.82318	KYNU;KYAT3		.	Platelet activation	2/124	0.827552	1	0.633754	PLA2G4A;PRKACB
	mitochondrial fission (GO:0000266)	3/21	0.015498	0.444306	5.61325	OPA1;MX2;DNM1L		.	Oocyte meiosis	2/125	0.830925	1	0.628684	YWHAE;PRKACB
	tRNA modification (GO:0006400)	5/58	0.015866	0.444859	3.3873	SSB;TRMT6;THUMPD3;CDKAL1;OSGEP		.	Renin secretion	1/69	0.831673	1	0.56946	PRKACB
	DNA biosynthetic process (GO:0071897)	4/39	0.0168744	0.446165	4.03002	RAD50;MRE11;RAD51C;RMI1		.	Prolactin signaling pathway	1/70	0.835972	1	0.561325	STAT1
	regulation of MyD88-independent toll-like receptor signaling pathway (GO:0034127)	2/8	0.01635	0.44617	9.82318	TICAM2;LY96		.	B cell receptor signaling pathway	1/71	0.840161	1	0.553419	PIK3AP1
	regulation of extrinsic apoptotic signaling pathway (GO:2001236)	5/59	0.0169835	0.446735	3.32989	CASP8;TNFSF10;FAS;ZMYND11;TANK		.	Dopaminergic synapse	2/131	0.849939	1	0.599889	PPP2R3C;PRKACB
	RNA-dependent DNA biosynthetic process (GO:0006278)	3/21	0.015498	0.446816	5.61325	RAD50;MRE11;PTGES3		.	Inositol phosphate metabolism	1/74	0.852098	1	0.530983	FIG4
	regulation of extrinsic apoptotic signaling pathway via death domain receptors (GO:1902041)	4/39	0.0168744	0.448489	4.03002	CASP8;TNFSF10;FAS;TANK		.	Metabolism of xenobiotics by cytochrome P450	1/74	0.852098	1	0.530983	HSD11B1
	benzene-containing compound metabolic process (GO:0042537)	2/8	0.01635	0.448569	9.82318	KYNU;KYAT3		.	Vascular smooth muscle contraction	2/132	0.852912	1	0.595344	PLA2G4A;PRKACB
	GTP metabolic process (GO:0046039)	3/21	0.015498	0.449355	5.61325	MOCS2;OPA1;AK3		.	Transcriptional misregulation in cancer	3/186	0.855746	1	0.633754	BCL2A1;IL2RB;BIRC3
	positive regulation of RNA polymerase II transcriptional preinitiation complex assembly (GO:0045899)	2/8	0.01635	0.450994	9.82318	PSMC6;PSMC2		.	Systemic lupus erythematosus	2/133	0.855832	1	0.590868	FCGR3A;SSB
	positive regulation of transcription from RNA polymerase I promoter (GO:0045943)	3/21	0.015498	0.451922	5.61325	UTP15;WDR75;WDR43		.	Pancreatic cancer	1/75	0.855876	1	0.523903	STAT1
	nucleic acid metabolic process (GO:0090304)	6/80	0.0162522	0.453196	2.94695	DUSP11;LSM8;RAD50;XRN2;TOPBP1;POLR2K		.	Pathways in cancer	10/530	0.870699	1	0.741372	FH;CASP8;STAT1;STAT2;CUL2;IL2RB;FAS;CYCS;PRKACB;BIRC3
	positive regulation of chromatin binding (GO:0035563)	2/8	0.01635	0.453445	9.82318	DTX3L;PARP9		.	Signaling pathways regulating pluripotency of stem cells	2/139	0.872265	1	0.565363	PCGF5;SMARCAD1
	negative regulation of response to endoplasmic reticulum stress (GO:1903573)	3/22	0.0176125	0.456226	5.3581	USP25;OPA1;TXNDC12		.	ECM-receptor interaction	1/82	0.879758	1	0.47918	CD47
	protein homotrimerization (GO:0070207)	3/22	0.0176125	0.458554	5.3581	PNPT1;CD247;TANK		.	Taste transduction	1/83	0.882831	1	0.473406	PRKACB
	protein localization to cilium (GO:0061512)	3/22	0.0176125	0.460905	5.3581	SNX10;ATP6V1D;BBS4		.	Cell adhesion molecules (CAMs)	2/145	0.886959	1	0.541969	CD274;PTPRC
	positive regulation of protein binding (GO:0032092)	5/60	0.0181519	0.467823	3.27439	DTX3L;SYAP1;NMD3;B2M;TANK		.	Colorectal cancer	1/86	0.891587	1	0.456892	CYCS
	JAK-STAT cascade (GO:0007259)	4/40	0.0183822	0.47138	3.92927	STAT1;STAT2;NMI;STAMBP		.	Phospholipase D signaling pathway	2/148	0.893705	1	0.530983	RHEB;PLA2G4A
	vitamin transmembrane transport (GO:0035461)	2/9	0.0206706	0.5047	8.73172	SLC25A32;STRA6		.	Gap junction	1/88	0.897058	1	0.446508	PRKACB
	DNA duplex unwinding (GO:0032508)	4/41	0.0199711	0.507028	3.83344	RAD50;MRE11;XPA;GTF2H1		.	Oxytocin signaling pathway	2/153	0.904123	1	0.51363	PLA2G4A;PRKACB
	regulation of helicase activity (GO:0051095)	2/9	0.0206706	0.507126	8.73172	SSBP1;IFIT1		.	Dilated cardiomyopathy (DCM)	1/91	0.904753	1	0.431788	PRKACB
	autophagosome maturation (GO:0097352)	3/23	0.0198795	0.507225	5.12514	GABARAPL1;SNX14;LAMP2		.	Morphine addiction	1/91	0.904753	1	0.431788	PRKACB
	mRNA methylation (GO:0080009)	2/9	0.0206706	0.509576	8.73172	TRMT10C;TRMT6		.	mRNA surveillance pathway	1/91	0.904753	1	0.431788	PPP2R3C
	DNA-templated transcription, initiation (GO:0006352)	10/186	0.0210498	0.511509	2.11251	GTF2A2;CCNH;GTF2B;TAF9;TAF1A;TFAM;GTF2H1;MNAT1;POLR2K;MED17		.	Amoebiasis	1/96	0.916322	1	0.409299	PRKACB
	mitochondrial calcium uptake (GO:0036444)	2/9	0.0206706	0.51205	8.73172	MICU2;MCU		.	Circadian entrainment	1/97	0.918462	1	0.40508	PRKACB
	indolalkylamine catabolic process (GO:0046218)	2/9	0.0206706	0.514548	8.73172	KYNU;IDO1		.	Pancreatic secretion	1/98	0.920547	1	0.400946	ATP1B3
	mitochondrion morphogenesis (GO:0070584)	2/9	0.0206706	0.51707	8.73172	PNPT1;DNM1L		.	Progesterone-mediated oocyte maturation	1/99	0.922579	1	0.396896	PRKACB
	positive regulation of cysteine-type endopeptidase activity involved in apoptotic process (GO:0043280)	7/109	0.0214159	0.517939	2.52339	CASP8;CASP4;TNFSF10;CYCS;RPS27L;FAS;TANK		.	AGE-RAGE signaling pathway in diabetic complications	1/100	0.924559	1	0.392927	STAT1
	regulation of T cell proliferation (GO:0042129)	5/62	0.0206449	0.51897	3.16877	CD274;ANXA1;PTPRC;GLMN;AIF1		.	Protein processing in endoplasmic reticulum	2/165	0.925361	1	0.476276	PLAA;EIF2S1
	ceramide metabolic process (GO:0006672)	4/42	0.0216421	0.520942	3.74216	ASAH1;ORMDL1;DEGS1;SPTSSA		.	Melanogenesis	1/101	0.926489	1	0.389037	PRKACB
	tRNA processing (GO:0008033)	5/62	0.0206449	0.52154	3.16877	SSB;TRMT10C;TRMT6;SARS;CDKAL1		.	Glucagon signaling pathway	1/103	0.930202	1	0.381483	PRKACB
	macroautophagy (GO:0016236)	7/110	0.0223891	0.526506	2.50045	TOMM70;GABARAPL1;FUNDC1;SNX14;LAMP2;PLAA;VPS36		.	Parathyroid hormone synthesis, secretion and action	1/106	0.935423	1	0.370686	PRKACB
	cytoplasmic pattern recognition receptor signaling pathway (GO:0002753)	3/24	0.0222995	0.526826	4.91159	ITCH;CASP8;UBE2V1		.	MAPK signaling pathway	4/295	0.944634	1	0.532783	FAS;PLA2G4A;PRKACB;LAMTOR3
	chaperone mediated protein folding requiring cofactor (GO:0051085)	3/24	0.0222995	0.529276	4.91159	HSPA9;DNAJC7;PTGES3		.	Cholinergic synapse	1/112	0.944724	1	0.350828	PRKACB
	DNA geometric change (GO:0032392)	3/24	0.0222995	0.53175	4.91159	RAD50;MRE11;MTERF1		.	Leukocyte transendothelial migration	1/112	0.944724	1	0.350828	RHOH
	mitochondrial transport (GO:0006839)	8/135	0.0222871	0.53395	2.32846	TOMM70;SLC25A16;PNPT1;SLC25A17;KIF1BP;TIMM23;SLC25A32;SLC25A5		.	Neurotrophin signaling pathway	1/119	0.953899	1	0.330191	YWHAE
	RNA catabolic process (GO:0006401)	4/43	0.0233961	0.547661	3.65514	RNASEH2B;PNPT1;XRN2;CNOT10		.	Relaxin signaling pathway	1/130	0.965344	1	0.302252	PRKACB
	protein prenylation (GO:0018342)	2/10	0.0254081	0.563729	7.85855	FNTA;RABGGTB		.	Proteoglycans in cancer	2/201	0.965505	1	0.390972	FAS;PRKACB
	tryptophan catabolic process (GO:0006569)	2/10	0.0254081	0.566191	7.85855	KYNU;IDO1		.	Estrogen signaling pathway	1/137	0.971101	1	0.286808	PRKACB
	telomere maintenance via recombination (GO:0000722)	2/10	0.0254081	0.568674	7.85855	RAD50;NSMCE2		.	Fluid shear stress and atherosclerosis	1/139	0.972563	1	0.282682	TXN
	prostaglandin metabolic process (GO:0006693)	3/25	0.0248727	0.569171	4.71513	PTGES3;PLAA;PTGR2		.	cAMP signaling pathway	2/212	0.972893	1	0.370686	ATP1B3;PRKACB
	positive regulation of T cell apoptotic process (GO:0070234)	2/10	0.0254081	0.571179	7.85855	CD274;IDO1		.	Ras signaling pathway	2/232	0.982603	1	0.33873	PLA2G4A;PRKACB
	nucleotide-binding domain, leucine rich repeat containing receptor signaling pathway (GO:0035872)	3/25	0.0248727	0.571735	4.71513	ITCH;CASP8;UBE2V1		.	Wnt signaling pathway	1/158	0.983249	1	0.248688	PRKACB
	tryptophan metabolic process (GO:0006568)	2/10	0.0254081	0.573706	7.85855	KYNU;IDO1		.	Hippo signaling pathway	1/160	0.984097	1	0.24558	YWHAE
	respiratory chain complex IV assembly (GO:0008535)	3/25	0.0248727	0.574322	4.71513	COX14;SMIM20;COA5		.	Tight junction	1/170	0.987737	1	0.231134	PRKACB
	positive regulation of viral life cycle (GO:1903902)	4/44	0.0252339	0.574859	3.57207	PPIE;TRIM38;IFIT1;SRPK1		.	Alcoholism	1/180	0.990545	1	0.218293	HAT1
	negative regulation of apoptotic signaling pathway (GO:2001234)	5/65	0.0247866	0.574937	3.02252	URI1;OPA1;BCL2A1;ZMYND11;SLC25A5		.	Focal adhesion	1/199	0.994233	1	0.197451	BIRC3
	glycine metabolic process (GO:0006544)	2/10	0.0254081	0.576256	7.85855	GLDC;SLC25A32		.	Rap1 signaling pathway	1/206	0.995194	1	0.190741	FYB1
	RNA metabolic process (GO:0016070)	10/191	0.0247431	0.576549	2.05721	DUSP11;LSM8;RNASEH2B;PNPT1;YTHDC2;XRN2;PARN;POLR2K;LRPPRC;MRPL44		.	Neuroactive ligand-receptor interaction	2/338	0.998475	1	0.232501	P2RY6;P2RY14
	modification-dependent protein catabolic process (GO:0019941)	8/141	0.0279837	0.618185	2.22937	NUB1;ITCH;PSMC6;PSMD14;DTX3L;PSMC2;BFAR;FBXO8		.	Olfactory transduction	1/444	0.999987	1	0.0884971	PRKACB
	RNA polymerase II transcriptional preinitiation complex assembly (GO:0051123)	2/11	0.0305385	0.63868	7.14413	GTF2A2;GTF2B		.
	cellular response to increased oxygen levels (GO:0036295)	2/11	0.0305385	0.641309	7.14413	ATP6V1G1;FAS		.
	cell part morphogenesis (GO:0032990)	2/11	0.0305385	0.643959	7.14413	PNPT1;DNM1L		.
	positive regulation of T cell activation (GO:0050870)	5/68	0.0294271	0.644491	2.88917	CD274;ANXA1;PTPRC;CD47;AIF1		.
	cellular response to interferon-beta (GO:0035458)	2/11	0.0305385	0.646631	7.14413	PNPT1;STAT1		.
	response to interferon-gamma (GO:0034341)	5/68	0.0294271	0.647269	2.88917	NUB1;CALCOCO2;STAT1;KYNU;AIF1		.
	regulation of RNA polymerase II transcriptional preinitiation complex assembly (GO:0045898)	2/11	0.0305385	0.649325	7.14413	PSMC6;PSMC2		.
	mRNA processing (GO:0006397)	13/283	0.0298781	0.651571	1.80497	SF3A3;CCNH;PPWD1;GTF2H1;ZCRB1;CWC27;LSM5;LSM8;RSRC1;PPIE;MNAT1;CMTR2;POLR2K		.
	regulation of chromatin binding (GO:0035561)	2/11	0.0305385	0.652042	7.14413	DTX3L;PARP9		.
	negative regulation of defense response to virus (GO:0050687)	2/11	0.0305385	0.654781	7.14413	ITCH;IFIT1		.
	phagosome acidification (GO:0090383)	3/27	0.0304771	0.656223	4.36586	ATP6V1G1;ATP6V1E1;ATP6V1D		.
	telomere maintenance via telomere lengthening (GO:0010833)	3/27	0.0304771	0.659003	4.36586	RAD50;MRE11;PTGES3		.
	phosphatidylcholine acyl-chain remodeling (GO:0036151)	3/27	0.0304771	0.661808	4.36586	LPCAT2;PLA2G4A;DBI		.
	nucleotide-binding oligomerization domain containing signaling pathway (GO:0070423)	3/28	0.0335071	0.670535	4.20994	ITCH;CASP8;UBE2V1		.
	cilium assembly (GO:0060271)	13/288	0.033709	0.671942	1.77363	YWHAE;HAUS3;SNX10;IFT20;CEP70;HYLS1;POC1B;CEP162;FOPNL;CEP63;ATP6V1D;SSX2IP;BBS4		.
	negative regulation of JNK cascade (GO:0046329)	3/28	0.0335071	0.673175	4.20994	ITCH;AIDA;ZMYND11		.
	negative regulation of programmed cell death (GO:0043069)	17/408	0.0329261	0.674787	1.6372	HSPA9;ANXA1;MRE11;BCL2A1;GLO1;TAF9;BFAR;HIGD1A;IFIT3;ITCH;OPA1;TMBIM4;IL2RB;FAS;EVI2B;LAMTOR5;BIRC3		.
	organelle fission (GO:0048285)	3/28	0.0335071	0.675836	4.20994	OPA1;MX2;DNM1L		.
	respiratory electron transport chain (GO:0022904)	6/94	0.0328612	0.676173	2.50805	COX7B;NDUFB5;NDUFB3;ETFRF1;CYCS;NDUFV2		.
	snRNA transcription from RNA polymerase II promoter (GO:0042795)	5/70	0.0328054	0.677757	2.80662	GTF2A2;GTF2B;TAF9;INTS8;POLR2K		.
	RNA phosphodiester bond hydrolysis (GO:0090501)	3/28	0.0335071	0.678518	4.20994	MRPL1;PARN;MRPL44		.
	regulation of mitochondrion organization (GO:0010821)	4/48	0.0334364	0.679785	3.27439	RHOT1;STAT2;WDR75;DNM1L		.
	snRNA transcription (GO:0009301)	5/70	0.0328054	0.680512	2.80662	GTF2A2;GTF2B;TAF9;INTS8;POLR2K		.
	interstrand cross-link repair (GO:0036297)	4/48	0.0334364	0.682504	3.27439	DCLRE1A;ERCC6L2;XPA;USP1		.
	Rab protein signal transduction (GO:0032482)	5/70	0.0328054	0.68329	2.80662	RAB37;RABL3;RAB18;RAB27A;RAB28		.
	positive regulation of lymphocyte proliferation (GO:0050671)	5/71	0.0345814	0.683988	2.76709	CD274;ANXA1;PTPRC;AIF1;TNFSF13B		.
	recombinational repair (GO:0000725)	5/71	0.0345814	0.68665	2.76709	RAD50;MRE11;RAD51C;PSMD14;NSMCE2		.
	prostanoid metabolic process (GO:0006692)	2/12	0.0360388	0.693984	6.54879	PLAA;PTGR2		.
	transcription from mitochondrial promoter (GO:0006390)	2/12	0.0360388	0.696613	6.54879	TFAM;MTERF1		.
	regulation of autophagy (GO:0010506)	10/203	0.0354683	0.698822	1.9356	ATP6V1G1;DRAM1;RHEB;WDR75;ATP6V1E1;DNM1L;DRAM2;LAMTOR3;ATP6V1D;LAMTOR5		.
	ribosomal subunit export from nucleus (GO:0000054)	2/12	0.0360388	0.699262	6.54879	NMD3;ABCE1		.
	non-recombinational repair (GO:0000726)	4/49	0.0357023	0.700726	3.20757	DCLRE1A;RAD50;MRE11;PSMD14		.
	nuclear-transcribed mRNA poly(A) tail shortening (GO:0000289)	3/29	0.0366874	0.701183	4.06477	PARN;CNOT10;EIF4E		.
	negative regulation of ERAD pathway (GO:1904293)	2/12	0.0360388	0.701931	6.54879	USP25;USP14		.
	coenzyme biosynthetic process (GO:0009108)	3/29	0.0366874	0.703819	4.06477	SLC25A16;MOCS2;MMADHC		.
	regulation of double-strand break repair via nonhomologous end joining (GO:2001032)	2/12	0.0360388	0.70462	6.54879	DTX3L;PARP9		.
	mitochondrial respiratory chain complex assembly (GO:0033108)	6/97	0.03747	0.713468	2.43048	NDUFB5;NDUFB3;COX14;NDUFV2;SMIM20;COA5		.
	double-strand break repair via nonhomologous end joining (GO:0006303)	4/50	0.0380548	0.72191	3.14342	DCLRE1A;RAD50;MRE11;PSMD14		.
	'de novo' posttranslational protein folding (GO:0051084)	3/30	0.0400168	0.748005	3.92927	HSPA9;DNAJC7;PTGES3		.
	fatty-acyl-CoA biosynthetic process (GO:0046949)	3/30	0.0400168	0.750755	3.92927	ACSL5;ACSL4;HSD17B12		.
	telomere maintenance (GO:0000723)	4/51	0.0404941	0.751424	3.08178	RAD50;MRE11;PTGES3;NSMCE2		.
	protein transport (GO:0015031)	14/326	0.0403551	0.751576	1.68742	ARRDC4;ATP6V1G1;TICAM2;STX8;RAB27A;GOLGA4;RAB37;LAMP2;RABL3;RAB18;RAB28;ATP6V1E1;GOLGA7;ATP6V1D		.
	negative regulation of stress-activated MAPK cascade (GO:0032873)	3/30	0.0400168	0.753526	3.92927	ITCH;AIDA;ZMYND11		.
	transcription, DNA-templated (GO:0006351)	15/356	0.0398953	0.75402	1.65559	GTF2A2;CCNH;GTF2B;ECD;TAF9;GTF2H1;FUBP1;HSF2;TAF1A;NFE2L3;TFAM;MTERF1;MNAT1;POLR2K;TCFL5		.
	response to fatty acid (GO:0070542)	2/13	0.0418869	0.755296	6.04504	GLDC;PDK3		.
	regulation of T cell cytokine production (GO:0002724)	2/13	0.0418869	0.757974	6.04504	TANK;B2M		.
	G2/M transition of mitotic cell cycle (GO:0000086)	7/126	0.0423085	0.760212	2.18293	YWHAE;BORA;CCNH;CEP70;HAUS3;CEP63;MNAT1		.
	mRNA modification (GO:0016556)	2/13	0.0418869	0.760672	6.04504	TRMT10C;TRMT6		.
	regulation of acetyl-CoA biosynthetic process from pyruvate (GO:0010510)	2/13	0.0418869	0.763388	6.04504	PDK3;DLD		.
	cellular response to exogenous dsRNA (GO:0071360)	2/13	0.0418869	0.766125	6.04504	IFIH1;IFIT1		.
	regulation of acyl-CoA biosynthetic process (GO:0050812)	2/13	0.0418869	0.76888	6.04504	PDK3;DLD		.
	DNA strand elongation (GO:0022616)	2/13	0.0418869	0.771656	6.04504	RAD50;MRE11		.
	DNA-templated transcriptional preinitiation complex assembly (GO:0070897)	2/13	0.0418869	0.774452	6.04504	GTF2A2;GTF2B		.
	cell cycle G2/M phase transition (GO:0044839)	7/127	0.0438411	0.784986	2.16574	YWHAE;BORA;CCNH;CEP70;HAUS3;CEP63;MNAT1		.
	negative regulation of extrinsic apoptotic signaling pathway (GO:2001237)	5/76	0.0443444	0.785728	2.58505	CASP8;TNFSF10;FAS;ZMYND11;TANK		.
	double-strand break repair via homologous recombination (GO:0000724)	5/76	0.0443444	0.788465	2.58505	RAD50;MRE11;RAD51C;PSMD14;NSMCE2		.
	intrinsic apoptotic signaling pathway (GO:0097193)	6/101	0.0442288	0.789159	2.33422	CUL5;BCL2A1;CUL2;CASP4;CYCS;TANK		.
	response to lipopolysaccharide (GO:0032496)	8/155	0.0450105	0.79477	2.02801	CD274;CXCL10;SRR;TICAM2;PLAA;LY96;FAS;CCR5		.
	positive regulation of TOR signaling (GO:0032008)	3/32	0.0471159	0.823399	3.68369	RHEB;LAMTOR3;LAMTOR5		.
	regulation of response to interferon-gamma (GO:0060330)	2/14	0.0480616	0.825786	5.61325	STAT1;PARP9		.
	phagosome maturation (GO:0090382)	3/32	0.0471159	0.826229	3.68369	ATP6V1G1;ATP6V1E1;ATP6V1D		.
	membrane fusion (GO:0061025)	4/54	0.048333	0.827661	2.91057	OPA1;BCL2A1;MX2;DNM1L		.
	negative regulation of endoplasmic reticulum stress-induced intrinsic apoptotic signaling pathway (GO:1902236)	2/14	0.0480616	0.828576	5.61325	OPA1;TXNDC12		.
	protein trimerization (GO:0070206)	3/32	0.0471159	0.829078	3.68369	PNPT1;CD247;TANK		.
	regulation of cellular response to heat (GO:1900034)	5/78	0.0486664	0.830584	2.51876	YWHAE;DNAJC2;DNAJC7;PTGES3;NUP37		.
	Golgi to vacuole transport (GO:0006896)	2/14	0.0480616	0.831385	5.61325	CCDC91;VPS54		.
	regulation of defense response to virus (GO:0050688)	2/14	0.0480616	0.834212	5.61325	HERC5;ITCH		.
	positive regulation of response to cytokine stimulus (GO:0060760)	2/14	0.0480616	0.837059	5.61325	IFIH1;TAF9		.
	regulation of cellular response to stress (GO:0080135)	6/104	0.0497669	0.846535	2.26689	YWHAE;DNAJC2;PNPT1;DNAJC7;PTGES3;NUP37		.
	regulation of DNA recombination (GO:0000018)	3/33	0.0508819	0.856932	3.57207	RAD50;MRE11;SMARCAD1		.
	DNA recombination (GO:0006310)	4/55	0.051119	0.858093	2.85765	RAD50;MRE11;RAD51C;RMI1		.
	positive regulation of cytokine-mediated signaling pathway (GO:0001961)	3/33	0.0508819	0.859769	3.57207	TICAM2;CASP4;PARP9		.
	intracellular pH reduction (GO:0051452)	3/33	0.0508819	0.862626	3.57207	ATP6V1G1;ATP6V1E1;ATP6V1D		.
	transcription initiation from RNA polymerase II promoter (GO:0006367)	8/160	0.0524489	0.877531	1.96464	GTF2A2;CCNH;GTF2B;TAF9;GTF2H1;MNAT1;POLR2K;MED17		.
	regulation of protein serine/threonine kinase activity (GO:0071900)	5/80	0.0532284	0.887661	2.4558	HERC5;ETAA1;SYAP1;GTF2H1;MNAT1		.
	DNA-templated transcription, termination (GO:0006353)	6/106	0.0536851	0.892362	2.22412	CCNH;TAF1A;MTERF1;GTF2H1;MNAT1;POLR2K		.
	positive regulation of double-strand break repair (GO:2000781)	2/15	0.0545426	0.894955	5.23903	DTX3L;PARP9		.
	apoptotic mitochondrial changes (GO:0008637)	3/34	0.0547893	0.89612	3.46701	BCL2A1;DNM1L;IFIT2		.
	positive regulation of cytokine production involved in immune response (GO:0002720)	2/15	0.0545426	0.897842	5.23903	TANK;B2M		.
	regulation of mitotic metaphase/anaphase transition (GO:0030071)	2/15	0.0545426	0.900748	5.23903	NSMCE2;RIOK2		.
	negative regulation of platelet-derived growth factor receptor signaling pathway (GO:0010642)	2/15	0.0545426	0.903673	5.23903	PTPRJ;PTPN12		.
	positive regulation of binding (GO:0051099)	5/81	0.0555995	0.906466	2.42548	DTX3L;NMD3;TXN;PARP9;B2M		.
	protein homotetramerization (GO:0051289)	4/57	0.0569491	0.922576	2.75738	GBP5;SRR;CD247;DNM1L		.
	I-kappaB kinase/NF-kappaB signaling (GO:0007249)	4/57	0.0569491	0.925514	2.75738	TICAM2;LY96;TANK;BIRC3		.
	cilium organization (GO:0044782)	9/192	0.057594	0.930071	1.84185	IFT20;POC1B;HYLS1;CEP162;FOPNL;SNX10;ATP6V1D;SSX2IP;BBS4		.
	monocarboxylic acid metabolic process (GO:0032787)	6/108	0.0577854	0.930218	2.18293	AASDH;GLO1;KYNU;NIT2;DLD;STRA6		.
	anatomical structure homeostasis (GO:0060249)	3/35	0.0588356	0.941185	3.36795	RAD50;MRE11;PTGES3		.
	regulation of cyclin-dependent protein kinase activity (GO:1904029)	3/35	0.0588356	0.944145	3.36795	HERC5;GTF2H1;MNAT1		.
	Ras protein signal transduction (GO:0007265)	10/223	0.0598563	0.954521	1.76201	USP8;RIT1;RHOT1;RAB37;RABL3;RAB18;RAB27A;RHOH;RAB28;AIF1		.
	regulation of interferon-alpha production (GO:0032647)	2/16	0.0613104	0.959715	4.91159	IFIH1;STAT1		.
	ruffle organization (GO:0031529)	2/16	0.0613104	0.962668	4.91159	PLEK;AIF1		.
	mitochondrial fusion (GO:0008053)	2/16	0.0613104	0.96564	4.91159	BCL2A1;OPA1		.
	guanosine-containing compound metabolic process (GO:1901068)	2/16	0.0613104	0.968629	4.91159	OPA1;AK3		.
	dicarboxylic acid metabolic process (GO:0043648)	4/59	0.0631203	0.970189	2.66391	FH;MDH1;SLC25A32;NIT2		.
	cellular response to dsRNA (GO:0071359)	2/16	0.0613104	0.971637	4.91159	IFIH1;IFIT1		.
	cellular response to molecule of bacterial origin (GO:0071219)	5/84	0.0630728	0.972389	2.33885	CD274;CXCL10;TICAM2;PLAA;CCR5		.
	ferric iron transport (GO:0015682)	3/36	0.0630184	0.974494	3.27439	ATP6V1G1;ATP6V1E1;ATP6V1D		.
	protein localization to microtubule organizing center (GO:1905508)	2/16	0.0613104	0.974664	4.91159	SNX10;BBS4		.
	endosome organization (GO:0007032)	3/36	0.0630184	0.977456	3.27439	USP8;RAB27A;SNX10		.
	mRNA catabolic process (GO:0006402)	3/36	0.0630184	0.980436	3.27439	PNPT1;CNOT10;LSM5		.
	transferrin transport (GO:0033572)	3/36	0.0630184	0.983434	3.27439	ATP6V1G1;ATP6V1E1;ATP6V1D		.
	regulation of protein binding (GO:0043393)	6/111	0.0642784	0.985023	2.12393	DTX3L;NMD3;AIDA;IFIT1;B2M;IFIT2		.
	ncRNA processing (GO:0034470)	10/227	0.0657867	0.999135	1.73096	UTP15;SSB;XRN2;WDR75;SARS;RIOK2;INTS8;WDR43;DCAF13;MRPL44		.
	mitochondrial ATP synthesis coupled electron transport (GO:0042775)	5/85	0.0656837	1	2.31134	COX7B;NDUFB5;NDUFB3;CYCS;NDUFV2		.
	regulation of type I interferon production (GO:0032479)	5/85	0.0656837	1	2.31134	HERC5;IFIH1;ITCH;MRE11;POLR2K		.
	base-excision repair (GO:0006284)	3/37	0.067335	1	3.1859	POLB;MRE11;XPA		.
	positive regulation of lymphocyte migration (GO:2000403)	2/17	0.0683463	1	4.62267	CXCL10;AIF1		.
	positive regulation of monocyte chemotaxis (GO:0090026)	2/17	0.0683463	1	4.62267	CXCL10;AIF1		.
	pigment granule transport (GO:0051904)	2/17	0.0683463	1	4.62267	RAB27A;BBS4		.
	regulation of protein localization to membrane (GO:1905475)	2/17	0.0683463	1	4.62267	STX8;CRIPT		.
	regulation of T cell migration (GO:2000404)	2/17	0.0683463	1	4.62267	CXCL10;AIF1		.
	melanosome transport (GO:0032402)	2/17	0.0683463	1	4.62267	RAB27A;BBS4		.
	positive regulation of T cell proliferation (GO:0042102)	4/61	0.0696277	1	2.57657	CD274;ANXA1;PTPRC;AIF1		.
	T cell differentiation (GO:0030217)	3/38	0.0717826	1	3.10206	ANXA1;PTPRC;RHOH		.
	retina homeostasis (GO:0001895)	3/38	0.0717826	1	3.10206	POC1B;B2M;BBS4		.
	negative regulation of apoptotic process (GO:0043066)	18/485	0.071968	1	1.45829	HSPA9;YWHAE;ANXA1;MRE11;BCL2A1;GLO1;TAF9;BFAR;HIGD1A;IFIT3;ITCH;OPA1;TMBIM4;IL2RB;FAS;EVI2B;LAMTOR5;BIRC3		.
	positive regulation of type I interferon production (GO:0032481)	4/62	0.0730059	1	2.53501	IFIH1;MRE11;STAT1;POLR2K		.
	negative regulation of intrinsic apoptotic signaling pathway (GO:2001243)	4/62	0.0730059	1	2.53501	URI1;OPA1;BCL2A1;TXNDC12		.
	cellular response to oxidative stress (GO:0034599)	6/115	0.0735754	1	2.05006	PNPT1;PYROXD1;ERCC6L2;TXNL1;CYCS;TXN		.
	establishment of melanosome localization (GO:0032401)	2/18	0.0756322	1	4.36586	RAB27A;BBS4		.
	organelle fusion (GO:0048284)	2/18	0.0756322	1	4.36586	BCL2A1;OPA1		.
	protein localization to centrosome (GO:0071539)	2/18	0.0756322	1	4.36586	SNX10;BBS4		.
	release of cytochrome c from mitochondria (GO:0001836)	2/18	0.0756322	1	4.36586	BCL2A1;DNM1L		.
	ubiquitin-dependent protein catabolic process via the multivesicular body sorting pathway (GO:0043162)	2/18	0.0756322	1	4.36586	PLAA;VPS36		.
	tRNA metabolic process (GO:0006399)	2/18	0.0756322	1	4.36586	SSB;SARS		.
	DNA conformation change (GO:0071103)	2/18	0.0756322	1	4.36586	HAT1;MTERF1		.
	regulation of type I interferon-mediated signaling pathway (GO:0060338)	3/39	0.0763583	1	3.02252	STAT1;STAT2;ABCE1		.
	Golgi to plasma membrane transport (GO:0006893)	3/39	0.0763583	1	3.02252	GOLGA4;EXOC6;GOLGA7		.
	mitotic DNA damage checkpoint (GO:0044773)	3/39	0.0763583	1	3.02252	MRE11;RPS27L;TOPBP1		.
	regulation of viral genome replication (GO:0045069)	4/63	0.0764659	1	2.49478	RSAD2;PPIE;IFIT1;SRPK1		.
	nuclear-transcribed mRNA catabolic process, deadenylation-dependent decay (GO:0000288)	4/63	0.0764659	1	2.49478	PARN;CNOT10;LSM5;EIF4E		.
	cognition (GO:0050890)	3/40	0.0810591	1	2.94695	SOBP;BBS4;STRA6		.
	positive regulation of mitotic cell cycle phase transition (GO:1901992)	3/40	0.0810591	1	2.94695	RAD51C;NSMCE2;AIF1		.
	regulation of release of cytochrome c from mitochondria (GO:0090199)	3/40	0.0810591	1	2.94695	OPA1;TNFSF10;DNM1L		.
	cellular response to lipopolysaccharide (GO:0071222)	5/91	0.0825915	1	2.15894	CD274;CXCL10;TICAM2;PLAA;CCR5		.
	protein-DNA complex assembly (GO:0065004)	5/91	0.0825915	1	2.15894	RAD51C;CCNH;XPA;GTF2H1;MNAT1		.
	positive regulation of chromosome organization (GO:2001252)	2/19	0.083151	1	4.13608	RAD50;MRE11		.
	protein ADP-ribosylation (GO:0006471)	2/19	0.083151	1	4.13608	PARP9;PARP8		.
	protein targeting to lysosome (GO:0006622)	2/19	0.083151	1	4.13608	LAMP2;GCC2		.
	positive regulation of mononuclear cell migration (GO:0071677)	2/19	0.083151	1	4.13608	CXCL10;AIF1		.
	Rac protein signal transduction (GO:0016601)	2/19	0.083151	1	4.13608	RHOH;AIF1		.
	positive regulation of toll-like receptor signaling pathway (GO:0034123)	2/19	0.083151	1	4.13608	TICAM2;RSAD2		.
	regulation of mitochondrial fission (GO:0090140)	2/19	0.083151	1	4.13608	STAT2;DNM1L		.
	osteoclast differentiation (GO:0030316)	2/19	0.083151	1	4.13608	GLO1;SNX10		.
	positive regulation of interferon-alpha production (GO:0032727)	2/19	0.083151	1	4.13608	IFIH1;STAT1		.
	positive regulation of blood coagulation (GO:0030194)	2/19	0.083151	1	4.13608	PLEK;ENPP4		.
	mitochondrial calcium ion homeostasis (GO:0051560)	2/19	0.083151	1	4.13608	MICU2;MCU		.
	response to interferon-beta (GO:0035456)	2/19	0.083151	1	4.13608	PNPT1;STAT1		.
	DNA synthesis involved in DNA repair (GO:0000731)	4/65	0.0836278	1	2.41801	RAD50;MRE11;RAD51C;RMI1		.
	telomere organization (GO:0032200)	3/41	0.0858818	1	2.87508	RAD50;MRE11;PTGES3		.
	plasma membrane bounded cell projection assembly (GO:0120031)	10/241	0.0894271	1	1.6304	IFT20;HYLS1;POC1B;CEP162;SNX10;FOPNL;AIF1;ATP6V1D;SSX2IP;BBS4		.
	positive regulation of protein localization to nucleus (GO:1900182)	3/42	0.0908233	1	2.80662	DTX3L;NMD3;PARP9		.
	glycolipid biosynthetic process (GO:0009247)	3/42	0.0908233	1	2.80662	UGCG;SCCPDH;PIGH		.
	regulation of endoplasmic reticulum stress-induced intrinsic apoptotic signaling pathway (GO:1902235)	2/20	0.0908861	1	3.92927	OPA1;TXNDC12		.
	aromatic amino acid family catabolic process (GO:0009074)	2/20	0.0908861	1	3.92927	KYNU;IDO1		.
	positive regulation of T cell migration (GO:2000406)	2/20	0.0908861	1	3.92927	CXCL10;AIF1		.
	melanosome localization (GO:0032400)	2/20	0.0908861	1	3.92927	RAB27A;BBS4		.
	extrinsic apoptotic signaling pathway (GO:0097191)	4/67	0.0911059	1	2.34583	CASP8;BCL2A1;FAS;TANK		.
	regulation of cyclin-dependent protein serine/threonine kinase activity (GO:0000079)	4/67	0.0911059	1	2.34583	HERC5;CCNH;GTF2H1;MNAT1		.
	protein stabilization (GO:0050821)	7/152	0.0939442	1	1.80953	CCNH;PTGES3;LAMP2;TAF9;CDC37L1;ATP1B3;GOLGA7		.
	regulation of endopeptidase activity (GO:0052548)	4/68	0.0949608	1	2.31134	PSMA3;PSME1;PSME2;BIRC3		.
	nucleobase-containing compound catabolic process (GO:0034655)	3/43	0.0958804	1	2.74135	RNASEH2B;PNPT1;XRN2		.
	ciliary basal body-plasma membrane docking (GO:0097711)	5/96	0.0982724	1	2.0465	YWHAE;CEP70;HAUS3;CEP162;CEP63		.
	regulation of apoptotic process (GO:0042981)	27/815	0.0987692	1	1.30172	MRE11;BCL2A1;GLO1;TAF9;IER3IP1;HIGD1A;TANK;IFIT3;IFIT2;OPA1;TNFSF10;DNM1L;HSPA9;ANXA1;STAT1;BFAR;RABGGTB;TIAM2;ITCH;TMBIM4;IL2RB;FAS;SGK3;EVI2B;ITGB3BP;LAMTOR5;BIRC3		.
	cobalamin metabolic process (GO:0009235)	2/21	0.0988217	1	3.74216	TCN1;MMADHC		.
	mitochondrial electron transport, cytochrome c to oxygen (GO:0006123)	2/21	0.0988217	1	3.74216	COX7B;CYCS		.
	tetrapyrrole metabolic process (GO:0033013)	2/21	0.0988217	1	3.74216	TCN1;MMADHC		.
	positive regulation of T cell mediated immunity (GO:0002711)	2/21	0.0988217	1	3.74216	TANK;B2M		.
	regulation of interleukin-2 production (GO:0032663)	2/21	0.0988217	1	3.74216	ANXA1;TANK		.
	nucleotide-excision repair, preincision complex stabilization (GO:0006293)	2/21	0.0988217	1	3.74216	XPA;GTF2H1		.
	mitochondrial calcium ion transmembrane transport (GO:0006851)	2/21	0.0988217	1	3.74216	MICU2;MCU		.
	amide biosynthetic process (GO:0043604)	3/44	0.10105	1	2.67905	ASNSD1;DEGS1;SPTSSA		.
	negative regulation of type I interferon production (GO:0032480)	3/44	0.10105	1	2.67905	IFIH1;HERC5;ITCH		.
	mitotic nuclear envelope disassembly (GO:0007077)	3/44	0.10105	1	2.67905	CNEP1R1;VRK1;NUP37		.
	posttranscriptional regulation of gene expression (GO:0010608)	3/44	0.10105	1	2.67905	TDRD7;PARP9;EIF4E		.
	mRNA metabolic process (GO:0016071)	5/97	0.101577	1	2.0254	SF3A3;PNPT1;SSB;CNOT10;LSM5		.
	regulation of interferon-gamma-mediated signaling pathway (GO:0060334)	2/22	0.106943	1	3.57207	STAT1;PARP9		.
	positive regulation of protein autophosphorylation (GO:0031954)	2/22	0.106943	1	3.57207	RAD50;MRE11		.
	NAD biosynthetic process (GO:0009435)	2/22	0.106943	1	3.57207	KYNU;PARP9		.
	nucleotide-excision repair, DNA incision, 3'-to lesion (GO:0006295)	2/22	0.106943	1	3.57207	XPA;GTF2H1		.
	hematopoietic progenitor cell differentiation (GO:0002244)	2/22	0.106943	1	3.57207	PTPRC;PLEK		.
	cytosolic calcium ion transport (GO:0060401)	2/22	0.106943	1	3.57207	MICU2;MCU		.
	nucleotide-excision repair, DNA duplex unwinding (GO:0000717)	2/22	0.106943	1	3.57207	XPA;GTF2H1		.
	maturation of LSU-rRNA (GO:0000470)	2/22	0.106943	1	3.57207	NSA2;MRPL1		.
	regulation of monocyte chemotaxis (GO:0090025)	2/22	0.106943	1	3.57207	CXCL10;AIF1		.
	histone acetylation (GO:0016573)	4/71	0.106975	1	2.21367	HAT1;TAF9;POLE3;YEATS4		.
	lysosomal transport (GO:0007041)	4/72	0.111126	1	2.18293	CCDC91;DTX3L;VPS54;GCC2		.
	protein complex disassembly (GO:0043241)	3/46	0.111711	1	2.56257	GABARAPL1;SNX14;LAMP2		.
	regulation of G1/S transition of mitotic cell cycle (GO:2000045)	3/46	0.111711	1	2.56257	PSME1;PSME2;AIF1		.
	nuclear envelope disassembly (GO:0051081)	3/46	0.111711	1	2.56257	CNEP1R1;VRK1;NUP37		.
	pyruvate metabolic process (GO:0006090)	3/46	0.111711	1	2.56257	SRR;GLO1;DLD		.
	regulation of generation of precursor metabolites and energy (GO:0043467)	3/46	0.111711	1	2.56257	PNPT1;ECD;NUP37		.
	mitochondrial electron transport, NADH to ubiquinone (GO:0006120)	3/46	0.111711	1	2.56257	NDUFB5;NDUFB3;NDUFV2		.
	regulation of DNA metabolic process (GO:0051052)	3/46	0.111711	1	2.56257	USP1;SMARCAD1;UBE2V1		.
	protein homooligomerization (GO:0051260)	8/190	0.113022	1	1.65443	GBP5;SRR;PNPT1;SMARCAD1;CD247;OLFM4;DNM1L;TANK		.
	protein K48-linked deubiquitination (GO:0071108)	2/23	0.115234	1	3.41676	USP25;USP8		.
	nucleotide-excision repair, DNA damage recognition (GO:0000715)	2/23	0.115234	1	3.41676	COPS4;XPA		.
	protein localization to Golgi apparatus (GO:0034067)	2/23	0.115234	1	3.41676	IFT20;GCC2		.
	positive regulation of ion transmembrane transporter activity (GO:0032414)	2/23	0.115234	1	3.41676	ATP1B3;CTSS		.
	regulation of cell size (GO:0008361)	2/23	0.115234	1	3.41676	PLEK;LAMTOR5		.
	NAD metabolic process (GO:0019674)	2/23	0.115234	1	3.41676	MDH1;KYNU		.
	nucleic acid phosphodiester bond hydrolysis (GO:0090305)	4/73	0.115347	1	2.15303	RAD50;XRN2;XPA;GTF2H1		.
	regulation of intrinsic apoptotic signaling pathway (GO:2001242)	3/47	0.117197	1	2.50805	URI1;BCL2A1;DNM1L		.
	cellular response to heat (GO:0034605)	3/47	0.117197	1	2.50805	YWHAE;HSPA9;HSF2		.
	protein K48-linked ubiquitination (GO:0070936)	3/48	0.122781	1	2.4558	ITCH;DTX3L;BFAR		.
	pattern recognition receptor signaling pathway (GO:0002221)	3/48	0.122781	1	2.4558	CD180;LY96;CTSS		.
	cellular macromolecule catabolic process (GO:0044265)	3/48	0.122781	1	2.4558	RNASEH2B;PNPT1;XRN2		.
	positive regulation of I-kappaB kinase/NF-kappaB signaling (GO:0043123)	7/163	0.123158	1	1.68742	TICAM2;CASP8;GOLT1B;TNFSF10;UBE2V1;TRIM38;BIRC3		.
	Golgi to plasma membrane protein transport (GO:0043001)	2/24	0.123683	1	3.27439	GOLGA4;GOLGA7		.
	intrinsic apoptotic signaling pathway in response to endoplasmic reticulum stress (GO:0070059)	2/24	0.123683	1	3.27439	CASP4;TANK		.
	macromolecule modification (GO:0043412)	2/24	0.123683	1	3.27439	PARN;LRPPRC		.
	positive regulation of endopeptidase activity (GO:0010950)	2/24	0.123683	1	3.27439	PSME1;PSME2		.
	cellular senescence (GO:0090398)	2/24	0.123683	1	3.27439	OPA1;NSMCE2		.
	negative regulation of proteasomal ubiquitin-dependent protein catabolic process (GO:0032435)	2/24	0.123683	1	3.27439	USP14;TAF9		.
	negative regulation of T cell proliferation (GO:0042130)	2/24	0.123683	1	3.27439	CD274;GLMN		.
	regulation of cell cycle G1/S phase transition (GO:1902806)	2/24	0.123683	1	3.27439	PSME1;PSME2		.
	positive regulation of apoptotic signaling pathway (GO:2001235)	4/76	0.128421	1	2.06804	TNFSF10;FAS;DNM1L;TANK		.
	RNA methylation (GO:0001510)	3/49	0.12846	1	2.40568	TRMT10C;TRMT6;THUMPD3		.
	mRNA splicing, via spliceosome (GO:0000398)	10/261	0.130996	1	1.50547	SF3A3;LSM8;RSRC1;PPIE;PPWD1;ZCRB1;CWC27;LSM5;POLR2K;SRPK1		.
	regulation of telomere maintenance (GO:0032204)	2/25	0.132275	1	3.14342	RAD50;MRE11		.
	cellular response to epidermal growth factor stimulus (GO:0071364)	2/25	0.132275	1	3.14342	SYAP1;PTPN12		.
	regulation of potassium ion transmembrane transporter activity (GO:1901016)	2/25	0.132275	1	3.14342	YWHAE;ATP1B3		.
	peptidyl-tyrosine dephosphorylation (GO:0035335)	2/25	0.132275	1	3.14342	PTPRJ;PTPN12		.
	response to ionizing radiation (GO:0010212)	4/77	0.132912	1	2.04118	RAD51C;TOPBP1;TANK;INIP		.
	response to endoplasmic reticulum stress (GO:0034976)	5/106	0.133709	1	1.85343	UBA5;CASP4;EIF2S1;TANK;TMCO1		.
	RNA splicing (GO:0008380)	5/106	0.133709	1	1.85343	SF3A3;RSRC1;ZCRB1;PPIG;SRPK1		.
	myeloid leukocyte differentiation (GO:0002573)	3/50	0.13423	1	2.35756	CASP8;GLO1;SNX10		.
	negative regulation of viral genome replication (GO:0045071)	3/50	0.13423	1	2.35756	RSAD2;IFIT1;SRPK1		.
	positive regulation of transferase activity (GO:0051347)	6/137	0.137349	1	1.72085	ARRDC4;RAD50;MRE11;DTX3L;PTGES3;PARN		.
	regulation of exocytosis (GO:0017157)	3/51	0.140089	1	2.31134	ANXA1;RAB37;RAB27A		.
	coenzyme metabolic process (GO:0006732)	3/51	0.140089	1	2.31134	SLC25A16;DBI;MMADHC		.
	positive regulation of wound healing (GO:0090303)	2/26	0.140998	1	3.02252	ANXA1;ENPP4		.
	tRNA methylation (GO:0030488)	2/26	0.140998	1	3.02252	TRMT10C;THUMPD3		.
	positive regulation of release of cytochrome c from mitochondria (GO:0090200)	2/26	0.140998	1	3.02252	TNFSF10;DNM1L		.
	regulation of protein localization to early endosome (GO:1902965)	1/6	0.143324	1	6.54879	DTX3L		.
	protein repair (GO:0030091)	1/6	0.143324	1	6.54879	TXN		.
	smooth muscle tissue development (GO:0048745)	1/6	0.143324	1	6.54879	STRA6		.
	vocal learning (GO:0042297)	1/6	0.143324	1	6.54879	STRA6		.
	succinyl-CoA metabolic process (GO:0006104)	1/6	0.143324	1	6.54879	SUCLG2		.
	histone-serine phosphorylation (GO:0035404)	1/6	0.143324	1	6.54879	VRK1		.
	positive regulation of deacetylase activity (GO:0090045)	1/6	0.143324	1	6.54879	FNTA		.
	negative regulation of translation in response to stress (GO:0032055)	1/6	0.143324	1	6.54879	EIF2S1		.
	regulation of translational initiation in response to stress (GO:0043558)	1/6	0.143324	1	6.54879	EIF2S1		.
	cellular response to iron ion (GO:0071281)	1/6	0.143324	1	6.54879	B2M		.
	mitochondrial ribosome assembly (GO:0061668)	1/6	0.143324	1	6.54879	FASTKD2		.
	SRP-dependent cotranslational protein targeting to membrane, translocation (GO:0006616)	1/6	0.143324	1	6.54879	SRP9		.
	positive regulation of protein localization to early endosome (GO:1902966)	1/6	0.143324	1	6.54879	DTX3L		.
	mRNA 3'-splice site recognition (GO:0000389)	1/6	0.143324	1	6.54879	SF3A3		.
	negative regulation of necroptotic process (GO:0060546)	1/6	0.143324	1	6.54879	BIRC3		.
	snRNA modification (GO:0040031)	1/6	0.143324	1	6.54879	MRPL1		.
	positive regulation of receptor binding (GO:1900122)	1/6	0.143324	1	6.54879	B2M		.
	muscle tissue development (GO:0060537)	1/6	0.143324	1	6.54879	STRA6		.
	cardiolipin acyl-chain remodeling (GO:0035965)	1/6	0.143324	1	6.54879	PLA2G4A		.
	rRNA transport (GO:0051029)	1/6	0.143324	1	6.54879	PNPT1		.
	ear development (GO:0043583)	1/6	0.143324	1	6.54879	STRA6		.
	positive regulation of vesicle fusion (GO:0031340)	1/6	0.143324	1	6.54879	ANXA1		.
	phosphorylation of RNA polymerase II C-terminal domain (GO:0070816)	1/6	0.143324	1	6.54879	GTF2H1		.
	positive regulation of granulocyte differentiation (GO:0030854)	1/6	0.143324	1	6.54879	EVI2B		.
	antigen processing and presentation of endogenous peptide antigen (GO:0002483)	1/6	0.143324	1	6.54879	B2M		.
	regulation of protein K63-linked ubiquitination (GO:1900044)	1/6	0.143324	1	6.54879	PLAA		.
	regulation of interferon-alpha secretion (GO:1902739)	1/6	0.143324	1	6.54879	IFIH1		.
	Golgi disassembly (GO:0090166)	1/6	0.143324	1	6.54879	VRK1		.
	macrophage derived foam cell differentiation (GO:0010742)	1/6	0.143324	1	6.54879	STAT1		.
	cerebral cortex cell migration (GO:0021795)	1/6	0.143324	1	6.54879	PEX13		.
	release of sequestered calcium ion into cytosol by sarcoplasmic reticulum (GO:0014808)	1/6	0.143324	1	6.54879	CCR5		.
	positive regulation of helicase activity (GO:0051096)	1/6	0.143324	1	6.54879	SSBP1		.
	positive regulation of protein localization to endosome (GO:1905668)	1/6	0.143324	1	6.54879	DTX3L		.
	dosage compensation by inactivation of X chromosome (GO:0009048)	1/6	0.143324	1	6.54879	PCGF5		.
	negative regulation of erythrocyte differentiation (GO:0045647)	1/6	0.143324	1	6.54879	HSPA9		.
	NADH metabolic process (GO:0006734)	1/6	0.143324	1	6.54879	MDH1		.
	positive regulation of transcription from RNA polymerase II promoter in response to heat stress (GO:0061408)	1/6	0.143324	1	6.54879	HSF2		.
	telencephalon cell migration (GO:0022029)	1/6	0.143324	1	6.54879	PEX13		.
	regulation of cell cycle checkpoint (GO:1901976)	1/6	0.143324	1	6.54879	ETAA1		.
	regulation of interleukin-10 secretion (GO:2001179)	1/6	0.143324	1	6.54879	CD274		.
	positive regulation of interferon-alpha secretion (GO:1902741)	1/6	0.143324	1	6.54879	IFIH1		.
	regulation of inositol phosphate biosynthetic process (GO:0010919)	1/6	0.143324	1	6.54879	PLEK		.
	imitative learning (GO:0098596)	1/6	0.143324	1	6.54879	STRA6		.
	positive regulation of autophagosome maturation (GO:1901098)	1/6	0.143324	1	6.54879	CALCOCO2		.
	monoubiquitinated protein deubiquitination (GO:0035520)	1/6	0.143324	1	6.54879	USP1		.
	mesenchymal cell differentiation involved in kidney development (GO:0072161)	1/6	0.143324	1	6.54879	STAT1		.
	foam cell differentiation (GO:0090077)	1/6	0.143324	1	6.54879	STAT1		.
	rRNA processing (GO:0006364)	8/202	0.144784	1	1.55615	UTP15;NSA2;MRPL1;XRN2;WDR75;RIOK2;WDR43;DCAF13		.
	regulation of cellular component organization (GO:0051128)	6/140	0.147593	1	1.68397	URI1;ZMYM1;ITCH;ZMYM6;SGK3;ANKRA2		.
	negative regulation of cytokine production (GO:0001818)	5/110	0.149286	1	1.78603	HERC5;IFIH1;CD274;ITCH;SARS		.
	RNA splicing, via transesterification reactions with bulged adenosine as nucleophile (GO:0000377)	9/236	0.149485	1	1.49845	SF3A3;LSM8;RSRC1;PPIE;PPWD1;ZCRB1;CWC27;LSM5;POLR2K		.
	regulation of cilium assembly (GO:1902017)	2/27	0.14984	1	2.91057	IFT20;BBS4		.
	negative regulation of small GTPase mediated signal transduction (GO:0051058)	2/27	0.14984	1	2.91057	STAMBP;ARHGAP12		.
	regulation of protein localization to nucleus (GO:1900180)	2/27	0.14984	1	2.91057	DTX3L;PARP9		.
	regulation of autophagy of mitochondrion (GO:1903146)	2/27	0.14984	1	2.91057	WDR75;DNM1L		.
	positive regulation of cell cycle (GO:0045787)	4/82	0.156286	1	1.91672	CCNH;CCPG1;EVI2B;EIF4E		.
	peptide biosynthetic process (GO:0043043)	7/174	0.156448	1	1.58074	MRPL3;MRPL1;SARS;TARS;MRPS21;MRPL13;MRPS18C		.
	negative regulation of proteasomal protein catabolic process (GO:1901799)	2/28	0.158789	1	2.80662	USP25;TAF9		.
	positive regulation of phosphate metabolic process (GO:0045937)	2/28	0.158789	1	2.80662	PTGES3;GLMN		.
	positive regulation of extrinsic apoptotic signaling pathway (GO:2001238)	2/28	0.158789	1	2.80662	TNFSF10;TANK		.
	positive regulation of cell communication (GO:0010647)	2/28	0.158789	1	2.80662	HOMER1;CDKN2AIP		.
	regulation of defense response to virus by virus (GO:0050690)	2/28	0.158789	1	2.80662	CD247;B2M		.
	calcium ion import (GO:0070509)	2/28	0.158789	1	2.80662	MICU2;MCU		.
	regulation of cell morphogenesis (GO:0022604)	2/28	0.158789	1	2.80662	ZMYM1;ZMYM6		.
	positive regulation of intracellular signal transduction (GO:1902533)	16/479	0.164327	1	1.31249	TICAM2;GOLT1B;PTPRJ;TXN;CXCL10;CASP8;RHEB;TNFSF10;FAS;TRIM38;UBE2V1;DNM1L;PIK3AP1;LAMTOR3;LAMTOR5;BIRC3		.
	positive regulation of cysteine-type endopeptidase activity (GO:2001056)	3/55	0.164332	1	2.14324	CASP8;TNFSF10;CYCS		.
	organelle assembly (GO:0070925)	13/376	0.164744	1	1.35853	GABARAPL1;HAUS3;SNX10;IFT20;HYLS1;POC1B;CEP162;FOPNL;CEP63;VPS36;ATP6V1D;SSX2IP;BBS4		.
	negative regulation of mitochondrial outer membrane permeabilization involved in apoptotic signaling pathway (GO:1901029)	1/7	0.165133	1	5.61325	SLC25A5		.
	rRNA-containing ribonucleoprotein complex export from nucleus (GO:0071428)	1/7	0.165133	1	5.61325	ABCE1		.
	positive regulation of metaphase/anaphase transition of cell cycle (GO:1902101)	1/7	0.165133	1	5.61325	NSMCE2		.
	negative regulation of interleukin-8 secretion (GO:2000483)	1/7	0.165133	1	5.61325	ANXA1		.
	regulation of DNA endoreduplication (GO:0032875)	1/7	0.165133	1	5.61325	MRE11		.
	nucleoside diphosphate metabolic process (GO:0009132)	1/7	0.165133	1	5.61325	CMPK2		.
	negative regulation of type 2 immune response (GO:0002829)	1/7	0.165133	1	5.61325	ANXA1		.
	release of sequestered calcium ion into cytosol by endoplasmic reticulum (GO:1903514)	1/7	0.165133	1	5.61325	CCR5		.
	negative regulation of telomere capping (GO:1904354)	1/7	0.165133	1	5.61325	RAD50		.
	molybdopterin cofactor metabolic process (GO:0043545)	1/7	0.165133	1	5.61325	MOCS2		.
	AMP metabolic process (GO:0046033)	1/7	0.165133	1	5.61325	AK3		.
	regulation of T-helper 1 cell differentiation (GO:0045625)	1/7	0.165133	1	5.61325	ANXA1		.
	regulation of toll-like receptor 9 signaling pathway (GO:0034163)	1/7	0.165133	1	5.61325	RSAD2		.
	strand invasion (GO:0042148)	1/7	0.165133	1	5.61325	RAD51C		.
	negative regulation of platelet-derived growth factor receptor-beta signaling pathway (GO:2000587)	1/7	0.165133	1	5.61325	PTPN12		.
	box C/D snoRNP assembly (GO:0000492)	1/7	0.165133	1	5.61325	TAF9		.
	positive regulation of B cell differentiation (GO:0045579)	1/7	0.165133	1	5.61325	PPP2R3C		.
	regulation of response to biotic stimulus (GO:0002831)	1/7	0.165133	1	5.61325	HERC5		.
	positive regulation of protein deubiquitination (GO:1903003)	1/7	0.165133	1	5.61325	TANK		.
	response to type I interferon (GO:0034340)	1/7	0.165133	1	5.61325	IFIT1		.
	positive regulation of lymphocyte apoptotic process (GO:0070230)	1/7	0.165133	1	5.61325	IDO1		.
	membrane fusion involved in viral entry into host cell (GO:0039663)	1/7	0.165133	1	5.61325	CCR5		.
	protein localization to cytoplasmic stress granule (GO:1903608)	1/7	0.165133	1	5.61325	SSB		.
	peroxisome proliferator activated receptor signaling pathway (GO:0035357)	1/7	0.165133	1	5.61325	PDK3		.
	positive regulation of mitotic sister chromatid separation (GO:1901970)	1/7	0.165133	1	5.61325	NSMCE2		.
	granulocyte migration (GO:0097530)	1/7	0.165133	1	5.61325	ANXA1		.
	regulation of RNA biosynthetic process (GO:2001141)	1/7	0.165133	1	5.61325	NMD3		.
	negative regulation of T cell mediated immunity (GO:0002710)	1/7	0.165133	1	5.61325	PTPRC		.
	positive regulation of tumor necrosis factor-mediated signaling pathway (GO:1903265)	1/7	0.165133	1	5.61325	CASP4		.
	protection from non-homologous end joining at telomere (GO:0031848)	1/7	0.165133	1	5.61325	DCLRE1A		.
	female genitalia development (GO:0030540)	1/7	0.165133	1	5.61325	STRA6		.
	fusion of virus membrane with host plasma membrane (GO:0019064)	1/7	0.165133	1	5.61325	CCR5		.
	activation of cysteine-type endopeptidase activity involved in apoptotic process by cytochrome c (GO:0008635)	1/7	0.165133	1	5.61325	CYCS		.
	molybdopterin cofactor biosynthetic process (GO:0032324)	1/7	0.165133	1	5.61325	MOCS2		.
	lens fiber cell differentiation (GO:0070306)	1/7	0.165133	1	5.61325	TDRD7		.
	cellular response to platelet-derived growth factor stimulus (GO:0036120)	1/7	0.165133	1	5.61325	SYAP1		.
	response to increased oxygen levels (GO:0036296)	1/7	0.165133	1	5.61325	ATP6V1G1		.
	sensory organ morphogenesis (GO:0090596)	1/7	0.165133	1	5.61325	STRA6		.
	negative regulation of necrotic cell death (GO:0060547)	1/7	0.165133	1	5.61325	BIRC3		.
	detection of molecule of bacterial origin (GO:0032490)	1/7	0.165133	1	5.61325	LY96		.
	ER overload response (GO:0006983)	1/7	0.165133	1	5.61325	TMCO1		.
	folic acid transport (GO:0015884)	1/7	0.165133	1	5.61325	SLC25A32		.
	microglial cell activation (GO:0001774)	1/7	0.165133	1	5.61325	AIF1		.
	regulation of cell cycle G2/M phase transition (GO:1902749)	4/84	0.166038	1	1.87108	YWHAE;CEP70;HAUS3;CEP63		.
	gene expression (GO:0010467)	14/411	0.166397	1	1.33844	YTHDC2;SARS;TARS;MRPS21;MRPL13;MRPL44;MRPS18C;DUSP11;MRPL3;MRPL1;XRN2;EIF4E;POLR2K;NUP37		.
	cortical cytoskeleton organization (GO:0030865)	2/29	0.167833	1	2.70984	PPP2R3C;PLEK		.
	negative regulation of lymphocyte proliferation (GO:0050672)	2/29	0.167833	1	2.70984	CD274;GLMN		.
	cellular response to lipid (GO:0071396)	7/178	0.169484	1	1.54522	CD274;CXCL10;URI1;TICAM2;PDK3;PLAA;CCR5		.
	sphingolipid metabolic process (GO:0006665)	5/116	0.173995	1	1.69365	UGCG;ASAH1;ORMDL1;DEGS1;SPTSSA		.
	ER to Golgi vesicle-mediated transport (GO:0006888)	7/180	0.176176	1	1.52805	TRAPPC2;DCTN6;TICAM2;COG5;TRAPPC6B;COPB1;IER3IP1		.
	regulation of protein insertion into mitochondrial membrane involved in apoptotic signaling pathway (GO:1900739)	2/30	0.176963	1	2.61952	YWHAE;CASP8		.
	negative regulation of secretion by cell (GO:1903531)	2/30	0.176963	1	2.61952	ANXA1;RSAD2		.
	protein localization to lysosome (GO:0061462)	2/30	0.176963	1	2.61952	GCC2;LAMTOR5		.
	positive regulation of protein insertion into mitochondrial membrane involved in apoptotic signaling pathway (GO:1900740)	2/30	0.176963	1	2.61952	YWHAE;CASP8		.
	positive regulation of B cell proliferation (GO:0030890)	2/30	0.176963	1	2.61952	PTPRC;TNFSF13B		.
	ubiquitin-dependent ERAD pathway (GO:0030433)	3/58	0.183267	1	2.03238	PSMC6;JKAMP;PSMC2		.
	T cell activation (GO:0042110)	4/88	0.186161	1	1.78603	CASP8;PTPRC;CLEC7A;RHOH		.
	positive regulation of protein complex assembly (GO:0031334)	4/88	0.186161	1	1.78603	GBP5;PLEK;XPA;GTF2H1		.
	negative regulation of toll-like receptor signaling pathway (GO:0034122)	2/31	0.186168	1	2.53501	TICAM2;LY96		.
	regulation of ubiquitin-protein transferase activity (GO:0051438)	2/31	0.186168	1	2.53501	ARRDC4;DTX3L		.
	alpha-amino acid metabolic process (GO:1901605)	2/31	0.186168	1	2.53501	SRR;KYAT3		.
	organelle transport along microtubule (GO:0072384)	2/31	0.186168	1	2.53501	RHOT1;LRPPRC		.
	multivesicular body organization (GO:0036257)	2/31	0.186168	1	2.53501	RAB27A;VPS36		.
	regulation of protein autophosphorylation (GO:0031952)	2/31	0.186168	1	2.53501	RAD50;MRE11		.
	nucleobase-containing small molecule interconversion (GO:0015949)	2/31	0.186168	1	2.53501	AK3;TXN		.
	Golgi to lysosome transport (GO:0090160)	1/8	0.186388	1	4.91159	CCDC91		.
	regulation of stress-activated protein kinase signaling cascade (GO:0070302)	1/8	0.186388	1	4.91159	FAS		.
	positive regulation of macrophage differentiation (GO:0045651)	1/8	0.186388	1	4.91159	CASP8		.
	histone H2A-K119 monoubiquitination (GO:0036353)	1/8	0.186388	1	4.91159	PCGF5		.
	negative regulation of appetite (GO:0032099)	1/8	0.186388	1	4.91159	BBS4		.
	regulation of fibroblast apoptotic process (GO:2000269)	1/8	0.186388	1	4.91159	IER3IP1		.
	late endosome to vacuole transport (GO:0045324)	1/8	0.186388	1	4.91159	LEPROTL1		.
	positive regulation of mitochondrial calcium ion concentration (GO:0051561)	1/8	0.186388	1	4.91159	MCU		.
	mast cell activation involved in immune response (GO:0002279)	1/8	0.186388	1	4.91159	MILR1		.
	ribosomal large subunit export from nucleus (GO:0000055)	1/8	0.186388	1	4.91159	NMD3		.
	defense response to protozoan (GO:0042832)	1/8	0.186388	1	4.91159	CLEC7A		.
	DNA recombinase assembly (GO:0000730)	1/8	0.186388	1	4.91159	RAD51C		.
	nucleoside diphosphate phosphorylation (GO:0006165)	1/8	0.186388	1	4.91159	CMPK2		.
	cellular response to interleukin-21 (GO:0098757)	1/8	0.186388	1	4.91159	STAT1		.
	negative regulation of leukocyte mediated cytotoxicity (GO:0001911)	1/8	0.186388	1	4.91159	PTPRC		.
	positive regulation of behavior (GO:0048520)	1/8	0.186388	1	4.91159	STRA6		.
	positive regulation of mitotic metaphase/anaphase transition (GO:0045842)	1/8	0.186388	1	4.91159	NSMCE2		.
	DNA repair complex assembly (GO:0090735)	1/8	0.186388	1	4.91159	RAD51C		.
	negative regulation of activated T cell proliferation (GO:0046007)	1/8	0.186388	1	4.91159	CD274		.
	positive regulation of DNA recombination (GO:0045911)	1/8	0.186388	1	4.91159	PRDM9		.
	interleukin-21-mediated signaling pathway (GO:0038114)	1/8	0.186388	1	4.91159	STAT1		.
	negative regulation of T-helper cell differentiation (GO:0045623)	1/8	0.186388	1	4.91159	ANXA1		.
	protein localization to microtubule (GO:0035372)	1/8	0.186388	1	4.91159	CRIPT		.
	multi-ciliated epithelial cell differentiation (GO:1903251)	1/8	0.186388	1	4.91159	CEP63		.
	positive regulation of cAMP-mediated signaling (GO:0043950)	1/8	0.186388	1	4.91159	CXCL10		.
	negative regulation of calcium ion transmembrane transport (GO:1903170)	1/8	0.186388	1	4.91159	YWHAE		.
	regulation of store-operated calcium entry (GO:2001256)	1/8	0.186388	1	4.91159	HOMER1		.
	regulation of metaphase/anaphase transition of cell cycle (GO:1902099)	1/8	0.186388	1	4.91159	RIOK2		.
	lung epithelium development (GO:0060428)	1/8	0.186388	1	4.91159	STRA6		.
	protein localization to microtubule cytoskeleton (GO:0072698)	1/8	0.186388	1	4.91159	CRIPT		.
	histone H4 deacetylation (GO:0070933)	1/8	0.186388	1	4.91159	SMARCAD1		.
	regulation of type B pancreatic cell development (GO:2000074)	1/8	0.186388	1	4.91159	RHEB		.
	double-strand break repair via synthesis-dependent strand annealing (GO:0045003)	1/8	0.186388	1	4.91159	RAD51C		.
	basement membrane organization (GO:0071711)	1/8	0.186388	1	4.91159	CTSS		.
	leptin-mediated signaling pathway (GO:0033210)	1/8	0.186388	1	4.91159	BBS4		.
	negative regulation of exocytosis (GO:0045920)	1/8	0.186388	1	4.91159	ANXA1		.
	rRNA pseudouridine synthesis (GO:0031118)	1/8	0.186388	1	4.91159	MRPL1		.
	positive regulation of interleukin-2 biosynthetic process (GO:0045086)	1/8	0.186388	1	4.91159	GLMN		.
	positive regulation of toll-like receptor 4 signaling pathway (GO:0034145)	1/8	0.186388	1	4.91159	TICAM2		.
	positive regulation of mitochondrial membrane permeability involved in apoptotic process (GO:1902110)	1/8	0.186388	1	4.91159	RHOT1		.
	mast cell degranulation (GO:0043303)	1/8	0.186388	1	4.91159	MILR1		.
	negative regulation of vascular permeability (GO:0043116)	1/8	0.186388	1	4.91159	PTPRJ		.
	regulation of ERAD pathway (GO:1904292)	1/8	0.186388	1	4.91159	USP25		.
	nucleotide phosphorylation (GO:0046939)	1/8	0.186388	1	4.91159	CMPK2		.
	regulation of T-helper 2 cell differentiation (GO:0045628)	1/8	0.186388	1	4.91159	ANXA1		.
	mitochondrial tRNA modification (GO:0070900)	1/8	0.186388	1	4.91159	TRMT10C		.
	positive regulation of viral entry into host cell (GO:0046598)	1/8	0.186388	1	4.91159	TRIM38		.
	nose development (GO:0043584)	1/8	0.186388	1	4.91159	STRA6		.
	response to ammonium ion (GO:0060359)	1/8	0.186388	1	4.91159	GLDC		.
	interleukin-1 beta secretion (GO:0050702)	1/8	0.186388	1	4.91159	GBP5		.
	regulation of T-helper 2 cell cytokine production (GO:2000551)	1/8	0.186388	1	4.91159	RSAD2		.
	DNA cytosine deamination (GO:0070383)	1/8	0.186388	1	4.91159	CDADC1		.
	regulation of receptor binding (GO:1900120)	1/8	0.186388	1	4.91159	B2M		.
	tRNA aminoacylation for mitochondrial protein translation (GO:0070127)	1/8	0.186388	1	4.91159	WARS2		.
	regulation of phosphorylation (GO:0042325)	5/119	0.186901	1	1.65096	PTGES3;STAT2;GLMN;ECD;NUP37		.
	mitotic cytokinesis (GO:0000281)	3/59	0.189704	1	1.99794	USP8;STAMBP;BBS4		.
	macromolecular complex assembly (GO:0065003)	5/120	0.191278	1	1.6372	NIFK;IL2RB;FAS;MNAT1;TANK		.
	cellular response to amino acid stimulus (GO:0071230)	2/32	0.195438	1	2.4558	LAMTOR3;LAMTOR5		.
	ceramide biosynthetic process (GO:0046513)	2/32	0.195438	1	2.4558	DEGS1;SPTSSA		.
	mitochondrial transmembrane transport (GO:1990542)	2/32	0.195438	1	2.4558	MICU2;MCU		.
	purine ribonucleoside triphosphate metabolic process (GO:0009205)	2/32	0.195438	1	2.4558	OPA1;AK3		.
	regulation of erythrocyte differentiation (GO:0045646)	2/32	0.195438	1	2.4558	HSPA9;STAT1		.
	positive regulation of telomere maintenance (GO:0032206)	2/32	0.195438	1	2.4558	RAD50;MRE11		.
	positive regulation of myeloid leukocyte differentiation (GO:0002763)	2/32	0.195438	1	2.4558	CASP8;EVI2B		.
	global genome nucleotide-excision repair (GO:0070911)	2/32	0.195438	1	2.4558	XPA;GTF2H1		.
	membrane lipid biosynthetic process (GO:0046467)	3/60	0.196197	1	1.96464	SCCPDH;DEGS1;SPTSSA		.
	protein tetramerization (GO:0051262)	4/90	0.196506	1	1.74634	GBP5;SRR;CD247;DNM1L		.
	actin cytoskeleton reorganization (GO:0031532)	3/61	0.202744	1	1.93243	ANXA1;PLEK;RHOH		.
	negative regulation of viral life cycle (GO:1903901)	3/61	0.202744	1	1.93243	RSAD2;IFIT1;SRPK1		.
	protein acetylation (GO:0006473)	2/33	0.204764	1	2.38138	GTF2B;HAT1		.
	entry into host cell (GO:0030260)	2/33	0.204764	1	2.38138	ITCH;CCR5		.
	negative regulation of mitochondrion organization (GO:0010823)	2/33	0.204764	1	2.38138	OPA1;SLC25A5		.
	tRNA-containing ribonucleoprotein complex export from nucleus (GO:0071431)	2/33	0.204764	1	2.38138	SSB;NUP37		.
	response to exogenous dsRNA (GO:0043330)	2/33	0.204764	1	2.38138	IFIH1;IFIT1		.
	tRNA export from nucleus (GO:0006409)	2/33	0.204764	1	2.38138	SSB;NUP37		.
	intra-Golgi vesicle-mediated transport (GO:0006891)	2/33	0.204764	1	2.38138	COG5;COPB1		.
	positive regulation of organelle organization (GO:0010638)	2/33	0.204764	1	2.38138	ANXA1;CALCOCO2		.
	negative regulation of response to reactive oxygen species (GO:1901032)	1/9	0.207103	1	4.36586	TXN		.
	positive regulation of triglyceride biosynthetic process (GO:0010867)	1/9	0.207103	1	4.36586	CNEP1R1		.
	microtubule anchoring at centrosome (GO:0034454)	1/9	0.207103	1	4.36586	BBS4		.
	sarcoplasmic reticulum calcium ion transport (GO:0070296)	1/9	0.207103	1	4.36586	CCR5		.
	positive regulation of coagulation (GO:0050820)	1/9	0.207103	1	4.36586	ENPP4		.
	regulation of ER-associated ubiquitin-dependent protein catabolic process (GO:1903069)	1/9	0.207103	1	4.36586	USP14		.
	regulation of mast cell activation (GO:0033003)	1/9	0.207103	1	4.36586	MILR1		.
	positive regulation of mitochondrial translation (GO:0070131)	1/9	0.207103	1	4.36586	TRMT10C		.
	positive regulation of natural killer cell mediated cytotoxicity directed against tumor cell target (GO:0002860)	1/9	0.207103	1	4.36586	GYPC		.
	regulation of morphogenesis of an epithelium (GO:1905330)	1/9	0.207103	1	4.36586	CXCL10		.
	regulation of cysteine-type endopeptidase activity involved in apoptotic signaling pathway (GO:2001267)	1/9	0.207103	1	4.36586	FAS		.
	interleukin-1 beta production (GO:0032611)	1/9	0.207103	1	4.36586	GBP5		.
	regulation of platelet-derived growth factor receptor-beta signaling pathway (GO:2000586)	1/9	0.207103	1	4.36586	PTPN12		.
	small nucleolar ribonucleoprotein complex assembly (GO:0000491)	1/9	0.207103	1	4.36586	TAF9		.
	regulation of integrin activation (GO:0033623)	1/9	0.207103	1	4.36586	PLEK		.
	nicotinamide nucleotide biosynthetic process (GO:0019359)	1/9	0.207103	1	4.36586	KYNU		.
	negative regulation of phosphatidylinositol 3-kinase signaling (GO:0014067)	1/9	0.207103	1	4.36586	STAMBP		.
	nucleoside phosphate biosynthetic process (GO:1901293)	1/9	0.207103	1	4.36586	CMPK2		.
	cellular response to oxygen levels (GO:0071453)	1/9	0.207103	1	4.36586	ATP6V1G1		.
	interleukin-1 secretion (GO:0050701)	1/9	0.207103	1	4.36586	GBP5		.
	positive regulation of natural killer cell mediated immune response to tumor cell (GO:0002857)	1/9	0.207103	1	4.36586	GYPC		.
	positive regulation of phosphorylation of RNA polymerase II C-terminal domain (GO:1901409)	1/9	0.207103	1	4.36586	CCNH		.
	protein localization to vacuole (GO:0072665)	1/9	0.207103	1	4.36586	LAMTOR5		.
	nucleoside triphosphate biosynthetic process (GO:0009142)	1/9	0.207103	1	4.36586	CMPK2		.
	production of siRNA involved in RNA interference (GO:0030422)	1/9	0.207103	1	4.36586	MRPL44		.
	mitotic DNA replication checkpoint (GO:0033314)	1/9	0.207103	1	4.36586	TOPBP1		.
	negative regulation of alcohol biosynthetic process (GO:1902931)	1/9	0.207103	1	4.36586	PLEK		.
	positive regulation of cell activation (GO:0050867)	1/9	0.207103	1	4.36586	PLEK		.
	positive regulation of hemostasis (GO:1900048)	1/9	0.207103	1	4.36586	ENPP4		.
	engulfment of apoptotic cell (GO:0043652)	1/9	0.207103	1	4.36586	RHOH		.
	toll-like receptor 3 signaling pathway (GO:0034138)	1/9	0.207103	1	4.36586	CASP8		.
	peroxisome fission (GO:0016559)	1/9	0.207103	1	4.36586	DNM1L		.
	positive regulation of cytokine production involved in inflammatory response (GO:1900017)	1/9	0.207103	1	4.36586	GBP5		.
	B cell homeostasis (GO:0001782)	1/9	0.207103	1	4.36586	PPP2R3C		.
	mast cell mediated immunity (GO:0002448)	1/9	0.207103	1	4.36586	MILR1		.
	axonal transport of mitochondrion (GO:0019896)	1/9	0.207103	1	4.36586	OPA1		.
	antigen processing and presentation of exogenous peptide antigen via MHC class I, TAP-independent (GO:0002480)	1/9	0.207103	1	4.36586	B2M		.
	mitochondrial fragmentation involved in apoptotic process (GO:0043653)	1/9	0.207103	1	4.36586	DNM1L		.
	serine family amino acid catabolic process (GO:0009071)	1/9	0.207103	1	4.36586	GLDC		.
	negative regulation of synaptic transmission, glutamatergic (GO:0051967)	1/9	0.207103	1	4.36586	ATAD1		.
	Golgi inheritance (GO:0048313)	1/9	0.207103	1	4.36586	VRK1		.
	response to vitamin (GO:0033273)	1/9	0.207103	1	4.36586	KYNU		.
	protein complex assembly (GO:0006461)	7/189	0.207615	1	1.45529	TRAPPC2;CASP8;OPA1;TRAPPC6B;DNM1L;TANK;MCU		.
	platelet degranulation (GO:0002576)	5/124	0.20914	1	1.58438	SCCPDH;APOOL;LAMP2;PLEK;CDC37L1		.
	cellular amide metabolic process (GO:0043603)	3/62	0.20934	1	1.90126	ASAH1;ORMDL1;NIT2		.
	cellular protein catabolic process (GO:0044257)	3/62	0.20934	1	1.90126	PSMA6;CASP8;CTSS		.
	regulation of cysteine-type endopeptidase activity involved in apoptotic process (GO:0043281)	4/93	0.21234	1	1.69001	YWHAE;TNFSF10;CYCS;LAMTOR5		.
	ncRNA metabolic process (GO:0034660)	2/34	0.214137	1	2.31134	NIFK;PARN		.
	response to amino acid (GO:0043200)	2/34	0.214137	1	2.31134	LAMTOR3;LAMTOR5		.
	regulation of JUN kinase activity (GO:0043506)	2/34	0.214137	1	2.31134	AIDA;TANK		.
	negative regulation of T cell activation (GO:0050868)	2/34	0.214137	1	2.31134	CD274;GLMN		.
	protein modification by small protein conjugation (GO:0032446)	13/398	0.2166	1	1.28343	ARRDC4;UBA5;CUL2;IPP;IFIH1;HERC5;KLHL9;HERC4;NUB1;ITCH;BIRC3;HERC6;NUP37		.
	NADH dehydrogenase complex assembly (GO:0010257)	3/64	0.222672	1	1.84185	NDUFB5;NDUFB3;NDUFV2		.
	mitochondrial respiratory chain complex I biogenesis (GO:0097031)	3/64	0.222672	1	1.84185	NDUFB5;NDUFB3;NDUFV2		.
	mitochondrial respiratory chain complex I assembly (GO:0032981)	3/64	0.222672	1	1.84185	NDUFB5;NDUFB3;NDUFV2		.
	tRNA transport (GO:0051031)	2/35	0.22355	1	2.2453	SSB;NUP37		.
	carboxylic acid transmembrane transport (GO:1905039)	2/35	0.22355	1	2.2453	SLC25A32;STRA6		.
	positive regulation of telomerase activity (GO:0051973)	2/35	0.22355	1	2.2453	PTGES3;PARN		.
	negative regulation of response to cytokine stimulus (GO:0060761)	1/10	0.227291	1	3.92927	PTPRC		.
	adrenal gland development (GO:0030325)	1/10	0.227291	1	3.92927	STRA6		.
	cellular response to thyroid hormone stimulus (GO:0097067)	1/10	0.227291	1	3.92927	CTSS		.
	regulation of sequestering of zinc ion (GO:0061088)	1/10	0.227291	1	3.92927	SLC30A6		.
	regulation of cellular respiration (GO:0043457)	1/10	0.227291	1	3.92927	PNPT1		.
	mitotic nuclear envelope reassembly (GO:0007084)	1/10	0.227291	1	3.92927	VRK1		.
	regulation of platelet-derived growth factor receptor signaling pathway (GO:0010640)	1/10	0.227291	1	3.92927	PTPRJ		.
	response to acidic pH (GO:0010447)	1/10	0.227291	1	3.92927	CTSS		.
	aspartate family amino acid metabolic process (GO:0009066)	1/10	0.227291	1	3.92927	NIT2		.
	regulation of NLRP3 inflammasome complex assembly (GO:1900225)	1/10	0.227291	1	3.92927	GBP5		.
	glutamine metabolic process (GO:0006541)	1/10	0.227291	1	3.92927	NIT2		.
	regulation of protein exit from endoplasmic reticulum (GO:0070861)	1/10	0.227291	1	3.92927	GCC2		.
	RNA phosphodiester bond hydrolysis, endonucleolytic (GO:0090502)	1/10	0.227291	1	3.92927	MRPL44		.
	cell differentiation involved in metanephros development (GO:0072202)	1/10	0.227291	1	3.92927	STAT1		.
	mitotic G1 DNA damage checkpoint (GO:0031571)	1/10	0.227291	1	3.92927	RPS27L		.
	DNA dealkylation involved in DNA repair (GO:0006307)	1/10	0.227291	1	3.92927	ALKBH3		.
	T cell chemotaxis (GO:0010818)	1/10	0.227291	1	3.92927	CXCL10		.
	regulation of granulocyte differentiation (GO:0030852)	1/10	0.227291	1	3.92927	EVI2B		.
	telomere maintenance in response to DNA damage (GO:0043247)	1/10	0.227291	1	3.92927	DCLRE1A		.
	primary miRNA processing (GO:0031053)	1/10	0.227291	1	3.92927	MRPL44		.
	regulation of natural killer cell mediated cytotoxicity directed against tumor cell target (GO:0002858)	1/10	0.227291	1	3.92927	GYPC		.
	G1 DNA damage checkpoint (GO:0044783)	1/10	0.227291	1	3.92927	RPS27L		.
	DNA replication-dependent nucleosome assembly (GO:0006335)	1/10	0.227291	1	3.92927	HAT1		.
	DNA dealkylation (GO:0035510)	1/10	0.227291	1	3.92927	ALKBH3		.
	IRES-dependent viral translational initiation (GO:0075522)	1/10	0.227291	1	3.92927	SSB		.
	protein deneddylation (GO:0000338)	1/10	0.227291	1	3.92927	COPS4		.
	regulation of DNA damage checkpoint (GO:2000001)	1/10	0.227291	1	3.92927	ETAA1		.
	positive regulation of smooth muscle cell migration (GO:0014911)	1/10	0.227291	1	3.92927	AIF1		.
	regulation of gene expression by genetic imprinting (GO:0006349)	1/10	0.227291	1	3.92927	PCGF5		.
	glucocorticoid metabolic process (GO:0008211)	1/10	0.227291	1	3.92927	HSD11B1		.
	UV protection (GO:0009650)	1/10	0.227291	1	3.92927	XPA		.
	mitotic G1/S transition checkpoint (GO:0044819)	1/10	0.227291	1	3.92927	RPS27L		.
	DNA replication-dependent nucleosome organization (GO:0034723)	1/10	0.227291	1	3.92927	HAT1		.
	T cell homeostasis (GO:0043029)	1/10	0.227291	1	3.92927	PPP2R3C		.
	dicarboxylic acid biosynthetic process (GO:0043650)	1/10	0.227291	1	3.92927	KYNU		.
	glucocorticoid biosynthetic process (GO:0006704)	1/10	0.227291	1	3.92927	HSD11B1		.
	negative regulation of endoplasmic reticulum unfolded protein response (GO:1900102)	1/10	0.227291	1	3.92927	BFAR		.
	quinone metabolic process (GO:1901661)	1/10	0.227291	1	3.92927	CRYZL1		.
	histone H2B ubiquitination (GO:0033523)	1/10	0.227291	1	3.92927	DTX3L		.
	pulmonary valve development (GO:0003177)	1/10	0.227291	1	3.92927	STRA6		.
	regulation of T cell apoptotic process (GO:0070232)	1/10	0.227291	1	3.92927	IDO1		.
	positive regulation of type 2 immune response (GO:0002830)	1/10	0.227291	1	3.92927	RSAD2		.
	regulation of T cell chemotaxis (GO:0010819)	1/10	0.227291	1	3.92927	CXCL10		.
	protein localization to nucleus (GO:0034504)	4/96	0.228515	1	1.6372	CNEP1R1;XPA;BBS4;GPN3		.
	glycolipid metabolic process (GO:0006664)	3/65	0.229399	1	1.81351	UGCG;ASAH1;SCCPDH		.
	regulation of cell division (GO:0051302)	3/65	0.229399	1	1.81351	KLHL9;EVI2B;BBS4		.
	fatty acid catabolic process (GO:0009062)	3/65	0.229399	1	1.81351	ACBD5;SLC25A17;PEX13		.
	positive regulation of signaling (GO:0023056)	2/36	0.232993	1	2.18293	HOMER1;CDKN2AIP		.
	response to tumor necrosis factor (GO:0034612)	4/97	0.233974	1	1.62032	NUB1;CASP8;YTHDC2;TANK		.
	sphingolipid biosynthetic process (GO:0030148)	3/66	0.236165	1	1.78603	UGCG;DEGS1;SPTSSA		.
	response to UV (GO:0009411)	4/98	0.239465	1	1.60378	XPA;USP1;ERCC8;EIF2S1		.
	positive regulation of cell growth (GO:0030307)	4/98	0.239465	1	1.60378	GOLGA4;TAF9;PLAA;CDKN2AIP		.
	response to molecule of bacterial origin (GO:0002237)	4/98	0.239465	1	1.60378	CXCL10;SRR;LY96;FAS		.
	regulation of DNA repair (GO:0006282)	2/37	0.242459	1	2.12393	USP1;UBE2V1		.
	positive regulation of mitochondrial outer membrane permeabilization involved in apoptotic signaling pathway (GO:1901030)	2/37	0.242459	1	2.12393	YWHAE;CASP8		.
	positive regulation of smooth muscle cell proliferation (GO:0048661)	2/37	0.242459	1	2.12393	STAT1;AIF1		.
	regulation of carbohydrate catabolic process (GO:0043470)	2/37	0.242459	1	2.12393	ECD;NUP37		.
	nucleotide-excision repair, DNA incision, 5'-to lesion (GO:0006296)	2/37	0.242459	1	2.12393	XPA;GTF2H1		.
	negative regulation of protein binding (GO:0032091)	3/67	0.242964	1	1.75938	IFIT1;B2M;IFIT2		.
	regulation of TOR signaling (GO:0032006)	3/67	0.242964	1	1.75938	RHEB;LAMTOR3;LAMTOR5		.
	insulin receptor signaling pathway (GO:0008286)	3/67	0.242964	1	1.75938	ATP6V1G1;ATP6V1E1;ATP6V1D		.
	negative regulation of morphogenesis of an epithelium (GO:1905331)	1/11	0.246966	1	3.57207	STAT1		.
	interleukin-27-mediated signaling pathway (GO:0070106)	1/11	0.246966	1	3.57207	STAT1		.
	negative regulation of leukocyte activation (GO:0002695)	1/11	0.246966	1	3.57207	MILR1		.
	microtubule anchoring at microtubule organizing center (GO:0072393)	1/11	0.246966	1	3.57207	BBS4		.
	morphogenesis of an epithelial sheet (GO:0002011)	1/11	0.246966	1	3.57207	ARHGAP12		.
	intracellular protein transmembrane transport (GO:0065002)	1/11	0.246966	1	3.57207	SRP9		.
	positive regulation by host of viral process (GO:0044794)	1/11	0.246966	1	3.57207	YTHDC2		.
	interleukin-2-mediated signaling pathway (GO:0038110)	1/11	0.246966	1	3.57207	IL2RB		.
	regulation of hydrogen peroxide-induced cell death (GO:1903205)	1/11	0.246966	1	3.57207	TXN		.
	UV-damage excision repair (GO:0070914)	1/11	0.246966	1	3.57207	XPA		.
	negative regulation of JUN kinase activity (GO:0043508)	1/11	0.246966	1	3.57207	AIDA		.
	Golgi ribbon formation (GO:0090161)	1/11	0.246966	1	3.57207	GCC2		.
	positive regulation of tumor necrosis factor secretion (GO:1904469)	1/11	0.246966	1	3.57207	IFIH1		.
	positive regulation of protein deacetylation (GO:0090312)	1/11	0.246966	1	3.57207	FNTA		.
	brain morphogenesis (GO:0048854)	1/11	0.246966	1	3.57207	BBS4		.
	regulation of actin filament depolymerization (GO:0030834)	1/11	0.246966	1	3.57207	PLEK		.
	internal protein amino acid acetylation (GO:0006475)	1/11	0.246966	1	3.57207	HAT1		.
	positive regulation of myoblast fusion (GO:1901741)	1/11	0.246966	1	3.57207	CD53		.
	mitochondrion distribution (GO:0048311)	1/11	0.246966	1	3.57207	DNM1L		.
	organic cyclic compound catabolic process (GO:1901361)	1/11	0.246966	1	3.57207	HSD11B1		.
	negative regulation of peptide secretion (GO:0002792)	1/11	0.246966	1	3.57207	RSAD2		.
	regulation of phosphorylation of RNA polymerase II C-terminal domain (GO:1901407)	1/11	0.246966	1	3.57207	CCNH		.
	positive regulation of mesenchymal cell proliferation (GO:0002053)	1/11	0.246966	1	3.57207	STAT1		.
	positive regulation of actin filament depolymerization (GO:0030836)	1/11	0.246966	1	3.57207	PLEK		.
	regulation of ceramide biosynthetic process (GO:2000303)	1/11	0.246966	1	3.57207	ORMDL1		.
	negative regulation of protein localization to cell surface (GO:2000009)	1/11	0.246966	1	3.57207	LEPROTL1		.
	cellular response to interleukin-2 (GO:0071352)	1/11	0.246966	1	3.57207	IL2RB		.
	response to sterol (GO:0036314)	1/11	0.246966	1	3.57207	CCR5		.
	macrophage differentiation (GO:0030225)	1/11	0.246966	1	3.57207	CASP8		.
	histone mRNA catabolic process (GO:0071044)	1/11	0.246966	1	3.57207	SSB		.
	negative regulation of receptor binding (GO:1900121)	1/11	0.246966	1	3.57207	B2M		.
	protein kinase C signaling (GO:0070528)	1/11	0.246966	1	3.57207	PLEK		.
	negative regulation of intrinsic apoptotic signaling pathway in response to DNA damage by p53 class mediator (GO:1902166)	1/11	0.246966	1	3.57207	TAF9		.
	metanephric mesenchyme development (GO:0072075)	1/11	0.246966	1	3.57207	STAT1		.
	modulation by host of viral genome replication (GO:0044827)	1/11	0.246966	1	3.57207	YTHDC2		.
	negative regulation of chemotaxis (GO:0050922)	1/11	0.246966	1	3.57207	AIF1		.
	establishment of synaptic vesicle localization (GO:0097480)	1/11	0.246966	1	3.57207	RAB27A		.
	inhibition of cysteine-type endopeptidase activity involved in apoptotic process (GO:1990001)	1/11	0.246966	1	3.57207	BIRC3		.
	cyclooxygenase pathway (GO:0019371)	1/11	0.246966	1	3.57207	PTGES3		.
	response to thyroid hormone (GO:0097066)	1/11	0.246966	1	3.57207	CTSS		.
	L-serine metabolic process (GO:0006563)	1/11	0.246966	1	3.57207	SRR		.
	aspartate family amino acid biosynthetic process (GO:0009067)	1/11	0.246966	1	3.57207	ASNSD1		.
	regulation of autophagosome maturation (GO:1901096)	1/11	0.246966	1	3.57207	CALCOCO2		.
	interleukin-35-mediated signaling pathway (GO:0070757)	1/11	0.246966	1	3.57207	STAT1		.
	positive regulation of T-helper cell differentiation (GO:0045624)	1/11	0.246966	1	3.57207	ANXA1		.
	cardiac muscle cell membrane repolarization (GO:0099622)	1/11	0.246966	1	3.57207	YWHAE		.
	membrane repolarization during action potential (GO:0086011)	1/11	0.246966	1	3.57207	YWHAE		.
	rRNA metabolic process (GO:0016072)	7/200	0.248618	1	1.37525	UTP15;NIFK;XRN2;WDR75;RIOK2;WDR43;DCAF13		.
	negative regulation of cysteine-type endopeptidase activity involved in apoptotic process (GO:0043154)	3/68	0.249795	1	1.7335	YWHAE;BIRC3;LAMTOR5		.
	regulation of lipid metabolic process (GO:0019216)	4/100	0.250535	1	1.57171	TIAM2;GLIPR1;ALAS1;BBS4		.
	protein targeting (GO:0006605)	5/133	0.251114	1	1.47717	TOMM70;LAMP2;TIMM23;SRP14;GOLGA7		.
	mitochondrion disassembly (GO:0061726)	2/38	0.251941	1	2.06804	GABARAPL1;FUNDC1		.
	transcription from RNA polymerase II promoter (GO:0006366)	15/485	0.255829	1	1.21524	GTF2A2;CCNH;GTF2B;ECD;TAF9;GTF2H1;MED17;FUBP1;HSF2;TAF1A;NFE2L3;MNAT1;INTS8;POLR2K;TCFL5		.
	ERBB2 signaling pathway (GO:0038128)	2/39	0.261432	1	2.01501	CUL5;PTPN12		.
	purine ribonucleoside monophosphate metabolic process (GO:0009167)	2/39	0.261432	1	2.01501	ATIC;AK3		.
	DNA replication-independent nucleosome assembly (GO:0006336)	2/39	0.261432	1	2.01501	HAT1;ITGB3BP		.
	alpha-amino acid catabolic process (GO:1901606)	2/39	0.261432	1	2.01501	KYNU;IDO1		.
	cellular response to amino acid starvation (GO:0034198)	2/39	0.261432	1	2.01501	FAS;EIF2S1		.
	acyl-CoA metabolic process (GO:0006637)	2/39	0.261432	1	2.01501	SUCLG2;DBI		.
	regulation of coenzyme metabolic process (GO:0051196)	2/39	0.261432	1	2.01501	ECD;NUP37		.
	cytoskeleton-dependent cytokinesis (GO:0061640)	3/70	0.263539	1	1.68397	USP8;STAMBP;BBS4		.
	protein ubiquitination involved in ubiquitin-dependent protein catabolic process (GO:0042787)	3/70	0.263539	1	1.68397	ITCH;CUL5;CUL2		.
	interferon-gamma-mediated signaling pathway (GO:0060333)	3/70	0.263539	1	1.68397	STAT1;TRIM38;B2M		.
	cellular response to oxygen-containing compound (GO:1901701)	9/274	0.26474	1	1.29064	CD274;CXCL10;TICAM2;ERCC6L2;PDK3;PLAA;CCR5;LAMTOR3;LAMTOR5		.
	pulmonary valve morphogenesis (GO:0003184)	1/12	0.266141	1	3.27439	STRA6		.
	positive regulation of protein depolymerization (GO:1901881)	1/12	0.266141	1	3.27439	PLEK		.
	regulation of mesenchymal cell proliferation (GO:0010464)	1/12	0.266141	1	3.27439	STAT1		.
	regulation of myoblast fusion (GO:1901739)	1/12	0.266141	1	3.27439	CD53		.
	regulation of IRE1-mediated unfolded protein response (GO:1903894)	1/12	0.266141	1	3.27439	BFAR		.
	mitochondrial outer membrane permeabilization (GO:0097345)	1/12	0.266141	1	3.27439	RHOT1		.
	regulation of intrinsic apoptotic signaling pathway in response to DNA damage by p53 class mediator (GO:1902165)	1/12	0.266141	1	3.27439	TAF9		.
	serine family amino acid biosynthetic process (GO:0009070)	1/12	0.266141	1	3.27439	SRR		.
	positive regulation of T-helper 1 type immune response (GO:0002827)	1/12	0.266141	1	3.27439	ANXA1		.
	lysine catabolic process (GO:0006554)	1/12	0.266141	1	3.27439	DLD		.
	protein import into peroxisome matrix (GO:0016558)	1/12	0.266141	1	3.27439	PEX13		.
	regulation of interleukin-2 biosynthetic process (GO:0045076)	1/12	0.266141	1	3.27439	GLMN		.
	positive regulation of potassium ion transmembrane transporter activity (GO:1901018)	1/12	0.266141	1	3.27439	ATP1B3		.
	DNA ligation involved in DNA repair (GO:0051103)	1/12	0.266141	1	3.27439	POLB		.
	eye photoreceptor cell development (GO:0042462)	1/12	0.266141	1	3.27439	BBS4		.
	histone H3 deacetylation (GO:0070932)	1/12	0.266141	1	3.27439	SMARCAD1		.
	regulation of protein localization to cell periphery (GO:1904375)	1/12	0.266141	1	3.27439	STX8		.
	tRNA 5'-leader removal (GO:0001682)	1/12	0.266141	1	3.27439	SSB		.
	lysine metabolic process (GO:0006553)	1/12	0.266141	1	3.27439	DLD		.
	activation of cysteine-type endopeptidase activity (GO:0097202)	1/12	0.266141	1	3.27439	CASP8		.
	regulation of protein import into nucleus, translocation (GO:0033158)	1/12	0.266141	1	3.27439	TXN		.
	purine nucleoside monophosphate biosynthetic process (GO:0009127)	1/12	0.266141	1	3.27439	ATIC		.
	PERK-mediated unfolded protein response (GO:0036499)	1/12	0.266141	1	3.27439	EIF2S1		.
	cellular response to fatty acid (GO:0071398)	1/12	0.266141	1	3.27439	PDK3		.
	regulation of antigen receptor-mediated signaling pathway (GO:0050854)	1/12	0.266141	1	3.27439	PTPRC		.
	regulation of hormone secretion (GO:0046883)	1/12	0.266141	1	3.27439	ANXA1		.
	endosome transport via multivesicular body sorting pathway (GO:0032509)	1/12	0.266141	1	3.27439	LEPROTL1		.
	positive regulation of mRNA metabolic process (GO:1903313)	1/12	0.266141	1	3.27439	PNPT1		.
	DNA deamination (GO:0045006)	1/12	0.266141	1	3.27439	CDADC1		.
	positive regulation of neuron migration (GO:2001224)	1/12	0.266141	1	3.27439	PLAA		.
	microtubule anchoring (GO:0034453)	1/12	0.266141	1	3.27439	GCC2		.
	phosphatidylcholine metabolic process (GO:0046470)	3/71	0.270447	1	1.66026	LPCAT2;PLA2G4A;DBI		.
	intraciliary transport involved in cilium assembly (GO:0035735)	2/40	0.270925	1	1.96464	IFT20;SSX2IP		.
	nucleotide-excision repair, DNA incision (GO:0033683)	2/40	0.270925	1	1.96464	XPA;GTF2H1		.
	sensory organ development (GO:0007423)	2/40	0.270925	1	1.96464	RAB18;STRA6		.
	autophagy of mitochondrion (GO:0000422)	2/40	0.270925	1	1.96464	GABARAPL1;FUNDC1		.
	regulation of viral transcription (GO:0046782)	2/40	0.270925	1	1.96464	GTF2B;POLR2K		.
	regulation of signal transduction by p53 class mediator (GO:1901796)	5/138	0.275291	1	1.42365	RAD50;MRE11;RMI1;TAF9;TOPBP1		.
	regulation of calcium-mediated signaling (GO:0050848)	2/41	0.280414	1	1.91672	TMBIM4;PLEK		.
	positive regulation of receptor-mediated endocytosis (GO:0048260)	2/41	0.280414	1	1.91672	ATAD1;B2M		.
	positive regulation of viral transcription (GO:0050434)	2/41	0.280414	1	1.91672	GTF2B;POLR2K		.
	positive regulation of cytokine secretion (GO:0050715)	3/73	0.284318	1	1.61477	IFIH1;CD274;GLMN		.
	response to iron ion (GO:0010039)	1/13	0.284829	1	3.02252	B2M		.
	sodium ion export from cell (GO:0036376)	1/13	0.284829	1	3.02252	ATP1B3		.
	mitochondrial genome maintenance (GO:0000002)	1/13	0.284829	1	3.02252	OPA1		.
	cellular response to nitrogen starvation (GO:0006995)	1/13	0.284829	1	3.02252	GABARAPL1		.
	regulation of cell aging (GO:0090342)	1/13	0.284829	1	3.02252	PNPT1		.
	DNA replication-independent nucleosome organization (GO:0034724)	1/13	0.284829	1	3.02252	HAT1		.
	steroid catabolic process (GO:0006706)	1/13	0.284829	1	3.02252	HSD11B1		.
	viral translation (GO:0019081)	1/13	0.284829	1	3.02252	SSB		.
	regulation of DNA-templated transcription in response to stress (GO:0043620)	1/13	0.284829	1	3.02252	HSF2		.
	endoplasmic reticulum tubular network organization (GO:0071786)	1/13	0.284829	1	3.02252	RAB18		.
	regulation of triglyceride biosynthetic process (GO:0010866)	1/13	0.284829	1	3.02252	CNEP1R1		.
	multivesicular body sorting pathway (GO:0071985)	1/13	0.284829	1	3.02252	RAB27A		.
	sodium ion export (GO:0071436)	1/13	0.284829	1	3.02252	ATP1B3		.
	DNA damage response, signal transduction by p53 class mediator resulting in transcription of p21 class mediator (GO:0006978)	1/13	0.284829	1	3.02252	RPS27L		.
	positive regulation of protein complex disassembly (GO:0043243)	1/13	0.284829	1	3.02252	CALCOCO2		.
	regulation of macrophage differentiation (GO:0045649)	1/13	0.284829	1	3.02252	CASP8		.
	cellular potassium ion homeostasis (GO:0030007)	1/13	0.284829	1	3.02252	ATP1B3		.
	regulation of cAMP metabolic process (GO:0030814)	1/13	0.284829	1	3.02252	CXCL10		.
	cardiolipin metabolic process (GO:0032048)	1/13	0.284829	1	3.02252	PLA2G4A		.
	cellular response to interleukin-15 (GO:0071350)	1/13	0.284829	1	3.02252	IL2RB		.
	synaptic vesicle localization (GO:0097479)	1/13	0.284829	1	3.02252	RAB27A		.
	toll-like receptor 9 signaling pathway (GO:0034162)	1/13	0.284829	1	3.02252	PIK3AP1		.
	membrane repolarization (GO:0086009)	1/13	0.284829	1	3.02252	ATP1B3		.
	prostanoid biosynthetic process (GO:0046457)	1/13	0.284829	1	3.02252	PTGES3		.
	RNA interference (GO:0016246)	1/13	0.284829	1	3.02252	MRPL44		.
	nucleotide metabolic process (GO:0009117)	1/13	0.284829	1	3.02252	SMARCAD1		.
	regulation of transcription initiation from RNA polymerase II promoter (GO:0060260)	1/13	0.284829	1	3.02252	GTF2B		.
	interleukin-15-mediated signaling pathway (GO:0035723)	1/13	0.284829	1	3.02252	IL2RB		.
	negative regulation of ubiquitin-protein transferase activity (GO:0051444)	1/13	0.284829	1	3.02252	DTX3L		.
	regulation of leukocyte migration (GO:0002685)	1/13	0.284829	1	3.02252	ANXA1		.
	high-density lipoprotein particle assembly (GO:0034380)	1/13	0.284829	1	3.02252	PRKACB		.
	negative regulation of interleukin-10 production (GO:0032693)	1/13	0.284829	1	3.02252	CD274		.
	mitotic DNA integrity checkpoint (GO:0044774)	1/13	0.284829	1	3.02252	TOPBP1		.
	cellular response to nitrogen levels (GO:0043562)	1/13	0.284829	1	3.02252	GABARAPL1		.
	pre-miRNA processing (GO:0031054)	1/13	0.284829	1	3.02252	MRPL44		.
	regulation of cellular carbohydrate metabolic process (GO:0010675)	1/13	0.284829	1	3.02252	PDK3		.
	regulation of ion transmembrane transporter activity (GO:0032412)	2/42	0.289894	1	1.87108	YWHAE;HOMER1		.
	regulation of telomerase activity (GO:0051972)	2/42	0.289894	1	1.87108	PTGES3;PARN		.
	cellular response to starvation (GO:0009267)	4/107	0.290028	1	1.46889	GABARAPL1;LAMP2;FAS;EIF2S1		.
	regulation of gene expression, epigenetic (GO:0040029)	3/74	0.291276	1	1.59295	TAF1A;GLMN;POLR2K		.
	regulation of B cell proliferation (GO:0030888)	2/43	0.299358	1	1.82757	PTPRC;TNFSF13B		.
	negative regulation of ERBB signaling pathway (GO:1901185)	2/43	0.299358	1	1.82757	PTPRJ;PTPN12		.
	eye development (GO:0001654)	2/43	0.299358	1	1.82757	RAB18;STRA6		.
	regulation of ATP metabolic process (GO:1903578)	2/43	0.299358	1	1.82757	ECD;NUP37		.
	histone H3 acetylation (GO:0043966)	2/43	0.299358	1	1.82757	TAF9;POLE3		.
	negative regulation of hydrogen peroxide-induced cell death (GO:1903206)	1/14	0.303042	1	2.80662	TXN		.
	ribonucleoside monophosphate biosynthetic process (GO:0009156)	1/14	0.303042	1	2.80662	ATIC		.
	ncRNA transcription (GO:0098781)	1/14	0.303042	1	2.80662	NIFK		.
	mitotic cell cycle arrest (GO:0071850)	1/14	0.303042	1	2.80662	PNPT1		.
	ubiquinone metabolic process (GO:0006743)	1/14	0.303042	1	2.80662	COQ10B		.
	lipid particle organization (GO:0034389)	1/14	0.303042	1	2.80662	RAB18		.
	stem cell development (GO:0048864)	1/14	0.303042	1	2.80662	PTPRC		.
	regulation of nucleocytoplasmic transport (GO:0046822)	1/14	0.303042	1	2.80662	MX2		.
	mitochondrial electron transport, ubiquinol to cytochrome c (GO:0006122)	1/14	0.303042	1	2.80662	CYCS		.
	modified amino acid transport (GO:0072337)	1/14	0.303042	1	2.80662	SLC25A32		.
	negative regulation of intrinsic apoptotic signaling pathway by p53 class mediator (GO:1902254)	1/14	0.303042	1	2.80662	TAF9		.
	positive regulation of mitochondrial fission (GO:0090141)	1/14	0.303042	1	2.80662	DNM1L		.
	cellular protein complex disassembly (GO:0043624)	1/14	0.303042	1	2.80662	ABCE1		.
	quinone biosynthetic process (GO:1901663)	1/14	0.303042	1	2.80662	COQ10B		.
	metallo-sulfur cluster assembly (GO:0031163)	1/14	0.303042	1	2.80662	HSPA9		.
	DNA damage response, signal transduction resulting in transcription (GO:0042772)	1/14	0.303042	1	2.80662	RPS27L		.
	oligosaccharide-lipid intermediate biosynthetic process (GO:0006490)	1/14	0.303042	1	2.80662	ALG14		.
	fatty acid transport (GO:0015908)	1/14	0.303042	1	2.80662	SLC25A17		.
	negative regulation of smooth muscle cell migration (GO:0014912)	1/14	0.303042	1	2.80662	AIF1		.
	nucleoside triphosphate metabolic process (GO:0009141)	1/14	0.303042	1	2.80662	CMPK2		.
	positive regulation of purine nucleotide metabolic process (GO:1900544)	1/14	0.303042	1	2.80662	CXCL10		.
	interleukin-6-mediated signaling pathway (GO:0070102)	1/14	0.303042	1	2.80662	STAT1		.
	regulation of protein modification by small protein conjugation or removal (GO:1903320)	1/14	0.303042	1	2.80662	ITCH		.
	positive regulation of transporter activity (GO:0032411)	1/14	0.303042	1	2.80662	SGK3		.
	regulation of mRNA catabolic process (GO:0061013)	1/14	0.303042	1	2.80662	PNPT1		.
	negative regulation of T cell receptor signaling pathway (GO:0050860)	1/14	0.303042	1	2.80662	PTPRJ		.
	response to interleukin-1 (GO:0070555)	3/76	0.305225	1	1.55103	YTHDC2;TAF9;TANK		.
	positive regulation of establishment of protein localization to mitochondrion (GO:1903749)	4/110	0.307217	1	1.42883	YWHAE;UGCG;CASP8;WDR75		.
	cellular response to insulin stimulus (GO:0032869)	4/110	0.307217	1	1.42883	ATP6V1G1;SYAP1;ATP6V1E1;ATP6V1D		.
	ribosomal small subunit biogenesis (GO:0042274)	2/44	0.308801	1	1.78603	RPS27L;RIOK2		.
	unsaturated fatty acid metabolic process (GO:0033559)	2/44	0.308801	1	1.78603	PLA2G4A;DEGS1		.
	positive regulation of macroautophagy (GO:0016239)	2/44	0.308801	1	1.78603	CALCOCO2;PAFAH1B2		.
	regulation of smooth muscle cell proliferation (GO:0048660)	2/44	0.308801	1	1.78603	STAT1;AIF1		.
	positive regulation of transport (GO:0051050)	2/44	0.308801	1	1.78603	ANXA1;SGK3		.
	positive regulation of viral process (GO:0048524)	2/44	0.308801	1	1.78603	GTF2B;POLR2K		.
	myeloid cell differentiation (GO:0030099)	2/44	0.308801	1	1.78603	HSPA9;EVI2B		.
	water-soluble vitamin metabolic process (GO:0006767)	3/77	0.312211	1	1.53089	TCN1;SLC25A32;MMADHC		.
	ERAD pathway (GO:0036503)	3/77	0.312211	1	1.53089	PSMC6;JKAMP;PSMC2		.
	inflammatory response (GO:0006954)	8/252	0.312935	1	1.24739	CXCL10;ITCH;ANXA1;CCRL2;CD180;FAS;NMI;AIF1		.
	visual perception (GO:0007601)	3/78	0.3192	1	1.51126	OPA1;RABGGTB;DRAM2		.
	myeloid cell development (GO:0061515)	1/15	0.320792	1	2.61952	EVI2B		.
	pseudouridine synthesis (GO:0001522)	1/15	0.320792	1	2.61952	MRPL1		.
	NAD biosynthesis via nicotinamide riboside salvage pathway (GO:0034356)	1/15	0.320792	1	2.61952	PARP9		.
	membrane repolarization during cardiac muscle cell action potential (GO:0086013)	1/15	0.320792	1	2.61952	YWHAE		.
	regulation of mRNA metabolic process (GO:1903311)	1/15	0.320792	1	2.61952	SRPK1		.
	ubiquinone biosynthetic process (GO:0006744)	1/15	0.320792	1	2.61952	COQ10B		.
	retinoic acid metabolic process (GO:0042573)	1/15	0.320792	1	2.61952	STRA6		.
	selective autophagy (GO:0061912)	1/15	0.320792	1	2.61952	CALCOCO2		.
	maintenance of protein location in nucleus (GO:0051457)	1/15	0.320792	1	2.61952	BBS4		.
	digestive tract morphogenesis (GO:0048546)	1/15	0.320792	1	2.61952	STRA6		.
	positive regulation of response to wounding (GO:1903036)	1/15	0.320792	1	2.61952	ANXA1		.
	regulation of B cell differentiation (GO:0045577)	1/15	0.320792	1	2.61952	PPP2R3C		.
	substrate-dependent cell migration (GO:0006929)	1/15	0.320792	1	2.61952	PTPRC		.
	G-protein coupled glutamate receptor signaling pathway (GO:0007216)	1/15	0.320792	1	2.61952	HOMER1		.
	positive regulation of potassium ion transmembrane transport (GO:1901381)	1/15	0.320792	1	2.61952	ATP1B3		.
	unsaturated fatty acid biosynthetic process (GO:0006636)	1/15	0.320792	1	2.61952	DEGS1		.
	regulation of tumor necrosis factor secretion (GO:1904467)	1/15	0.320792	1	2.61952	IFIH1		.
	intra-S DNA damage checkpoint (GO:0031573)	1/15	0.320792	1	2.61952	MRE11		.
	negative regulation of release of cytochrome c from mitochondria (GO:0090201)	1/15	0.320792	1	2.61952	OPA1		.
	response to cholesterol (GO:0070723)	1/15	0.320792	1	2.61952	CCR5		.
	regulation of mitotic sister chromatid separation (GO:0010965)	1/15	0.320792	1	2.61952	RIOK2		.
	vasculature development (GO:0001944)	1/15	0.320792	1	2.61952	STRA6		.
	regulation of mitochondrial translation (GO:0070129)	1/15	0.320792	1	2.61952	TRMT10C		.
	amide transport (GO:0042886)	1/15	0.320792	1	2.61952	SLC25A32		.
	cofactor transport (GO:0051181)	1/15	0.320792	1	2.61952	SLC25A32		.
	negative regulation of DNA-dependent DNA replication (GO:2000104)	1/15	0.320792	1	2.61952	MRE11		.
	positive regulation of syncytium formation by plasma membrane fusion (GO:0060143)	1/15	0.320792	1	2.61952	CD53		.
	regulation of T cell mediated cytotoxicity (GO:0001914)	1/15	0.320792	1	2.61952	PTPRC		.
	positive regulation of protein export from nucleus (GO:0046827)	1/15	0.320792	1	2.61952	YWHAE		.
	inhibition of cysteine-type endopeptidase activity (GO:0097340)	1/15	0.320792	1	2.61952	BIRC3		.
	cellular sodium ion homeostasis (GO:0006883)	1/15	0.320792	1	2.61952	ATP1B3		.
	establishment of protein localization to endoplasmic reticulum (GO:0072599)	1/15	0.320792	1	2.61952	SRP14		.
	cellular response to corticosteroid stimulus (GO:0071384)	1/15	0.320792	1	2.61952	ANXA1		.
	regulated exocytosis (GO:0045055)	5/148	0.324881	1	1.32746	SCCPDH;APOOL;LAMP2;PLEK;CDC37L1		.
	intraciliary transport (GO:0042073)	2/46	0.327605	1	1.70838	IFT20;SSX2IP		.
	interleukin-12-mediated signaling pathway (GO:0035722)	2/46	0.327605	1	1.70838	HSPA9;PSME2		.
	cellular response to interleukin-12 (GO:0071349)	2/46	0.327605	1	1.70838	HSPA9;PSME2		.
	maturation of SSU-rRNA (GO:0030490)	2/46	0.327605	1	1.70838	RIOK2;DCAF13		.
	spindle assembly (GO:0051225)	3/80	0.333183	1	1.47348	HAUS3;CEP63;BIRC3		.
	positive regulation of tumor necrosis factor production (GO:0032760)	2/47	0.336957	1	1.67203	IFIH1;LY96		.
	positive regulation of gene expression, epigenetic (GO:0045815)	2/47	0.336957	1	1.67203	TAF1A;POLR2K		.
	histone H4 acetylation (GO:0043967)	2/47	0.336957	1	1.67203	HAT1;YEATS4		.
	dendritic cell chemotaxis (GO:0002407)	1/16	0.338091	1	2.4558	CCR5		.
	negative regulation of immune effector process (GO:0002698)	1/16	0.338091	1	2.4558	ITCH		.
	regulation of toll-like receptor 4 signaling pathway (GO:0034143)	1/16	0.338091	1	2.4558	TICAM2		.
	positive regulation of regulated secretory pathway (GO:1903307)	1/16	0.338091	1	2.4558	RAB27A		.
	phosphatidylinositol acyl-chain remodeling (GO:0036149)	1/16	0.338091	1	2.4558	PLA2G4A		.
	regulation of RIG-I signaling pathway (GO:0039535)	1/16	0.338091	1	2.4558	BIRC3		.
	histone H2A acetylation (GO:0043968)	1/16	0.338091	1	2.4558	YEATS4		.
	activation of NF-kappaB-inducing kinase activity (GO:0007250)	1/16	0.338091	1	2.4558	TANK		.
	regulation of reactive oxygen species biosynthetic process (GO:1903426)	1/16	0.338091	1	2.4558	RAB27A		.
	cardiac ventricle development (GO:0003231)	1/16	0.338091	1	2.4558	STRA6		.
	neuromuscular process (GO:0050905)	1/16	0.338091	1	2.4558	STRA6		.
	positive regulation of lymphocyte differentiation (GO:0045621)	1/16	0.338091	1	2.4558	PPP2R3C		.
	positive regulation of antigen receptor-mediated signaling pathway (GO:0050857)	1/16	0.338091	1	2.4558	PTPRC		.
	heme biosynthetic process (GO:0006783)	1/16	0.338091	1	2.4558	ALAS1		.
	negative regulation of translational initiation (GO:0045947)	1/16	0.338091	1	2.4558	EIF2S1		.
	positive regulation of myotube differentiation (GO:0010831)	1/16	0.338091	1	2.4558	CD53		.
				positive regulation of cilium assembly (GO:0045724)	1/16	0.338091		1	2.4558	BBS4	.
				rRNA transcription (GO:0009303)	1/16	0.338091		1	2.4558	NIFK	.
				T cell migration (GO:0072678)	1/16	0.338091		1	2.4558	CXCL10	.
				positive regulation of triglyceride metabolic process (GO:0090208)	1/16	0.338091		1	2.4558	CNEP1R1	.
				positive regulation of cyclic nucleotide metabolic process (GO:0030801)	1/16	0.338091		1	2.4558	CXCL10	.
				genitalia development (GO:0048806)	1/16	0.338091		1	2.4558	STRA6	.
				positive regulation of G2/M transition of mitotic cell cycle (GO:0010971)	1/16	0.338091		1	2.4558	RAD51C	.
				positive regulation of cell migration involved in sprouting angiogenesis (GO:0090050)	1/16	0.338091		1	2.4558	ANXA1	.
				regulation of stem cell proliferation (GO:0072091)	1/16	0.338091		1	2.4558	PTPRC	.
				positive regulation of G1/S transition of mitotic cell cycle (GO:1900087)	1/16	0.338091		1	2.4558	AIF1	.
				artery development (GO:0060840)	1/16	0.338091		1	2.4558	STRA6	.
				activation of protein kinase A activity (GO:0034199)	1/16	0.338091		1	2.4558	PRKACB	.
				regulation of membrane repolarization (GO:0060306)	1/16	0.338091		1	2.4558	YWHAE	.
				positive regulation of DNA-templated transcription, initiation (GO:2000144)	1/16	0.338091		1	2.4558	GTF2B	.
				sensory perception of light stimulus (GO:0050953)	3/81	0.340171		1	1.45529	OPA1;RABGGTB;DRAM2	.
				cellular response to interferon-gamma (GO:0071346)	4/116	0.341859		1	1.35492	STAT1;TRIM38;B2M;AIF1	.
				negative regulation of mitotic cell cycle (GO:0045930)	2/48	0.346269		1	1.6372	BTG3;PNPT1	.
				cytoplasmic microtubule organization (GO:0031122)	2/48	0.346269		1	1.6372	ATAD1;CRIPT	.
				intrinsic apoptotic signaling pathway in response to DNA damage (GO:0008630)	2/48	0.346269		1	1.6372	BCL2A1;RPS27L	.
				positive regulation of chemotaxis (GO:0050921)	2/48	0.346269		1	1.6372	CXCL10;AIF1	.
				cellular response to mechanical stimulus (GO:0071260)	2/48	0.346269		1	1.6372	CASP8;FAS	.
				regulation of anatomical structure morphogenesis (GO:0022603)	3/82	0.347154		1	1.43754	ZMYM1;STAT2;ZMYM6	.
				positive regulation of protein secretion (GO:0050714)	3/82	0.347154		1	1.43754	GLMN;DNM1L;MCU	.
				positive regulation of DNA metabolic process (GO:0051054)	3/82	0.347154		1	1.43754	RAD50;MRE11;DBF4	.
				spermatogenesis (GO:0007283)	5/153	0.350053		1	1.28408	HERC4;TSGA10;XRN2;TDRD7;TCFL5	.
				cellular protein metabolic process (GO:0044267)	14/484	0.350491		1	1.13657	USP25;SPPL2A;SARS;TARS;MRPS21;TXN;RABGGTB;MRPL13;PGA5;MRPS18C;MRPL3;MRPL1;B2M;PIGH	.
				ribosome biogenesis (GO:0042254)	7/226	0.353105		1	1.21703	UTP15;XRN2;WDR75;RIOK2;ABCE1;WDR43;DCAF13	.
				cytosolic transport (GO:0016482)	4/118	0.353443		1	1.33196	CCDC91;STX8;VPS54;GCC2	.
				positive regulation of protein serine/threonine kinase activity (GO:0071902)	4/118	0.353443		1	1.33196	ETAA1;CCNH;SYAP1;TANK	.
				positive regulation of homeostatic process (GO:0032846)	3/83	0.35413		1	1.42022	RAD50;MRE11;STAT1	.
				positive regulation of cell cycle G2/M phase transition (GO:1902751)	1/17	0.35495		1	2.31134	RAD51C	.
				positive regulation of focal adhesion assembly (GO:0051894)	1/17	0.35495		1	2.31134	PTPRJ	.
				negative regulation of antigen receptor-mediated signaling pathway (GO:0050858)	1/17	0.35495		1	2.31134	PTPRJ	.
				DNA catabolic process (GO:0006308)	1/17	0.35495		1	2.31134	XRN2	.
				response to interferon-alpha (GO:0035455)	1/17	0.35495		1	2.31134	MX2	.
				glycosphingolipid biosynthetic process (GO:0006688)	1/17	0.35495		1	2.31134	UGCG	.
				positive regulation of interleukin-6 secretion (GO:2000778)	1/17	0.35495		1	2.31134	IFIH1	.
				preassembly of GPI anchor in ER membrane (GO:0016254)	1/17	0.35495		1	2.31134	PIGH	.
				RNA stabilization (GO:0043489)	1/17	0.35495		1	2.31134	PARN	.
				negative regulation of telomere maintenance (GO:0032205)	1/17	0.35495		1	2.31134	RAD50	.
				histone H2A ubiquitination (GO:0033522)	1/17	0.35495		1	2.31134	DTX3L	.
				DNA packaging (GO:0006323)	1/17	0.35495		1	2.31134	HAT1	.
				regulation of mitochondrial outer membrane permeabilization involved in apoptotic signaling pathway (GO:1901028)	1/17	0.35495		1	2.31134	SLC25A5	.
				positive regulation of response to biotic stimulus (GO:0002833)	1/17	0.35495		1	2.31134	CD180	.
				positive regulation of dendrite extension (GO:1903861)	1/17	0.35495		1	2.31134	PLAA	.
				histone H2A monoubiquitination (GO:0035518)	1/17	0.35495		1	2.31134	PCGF5	.
				negative regulation of interleukin-8 production (GO:0032717)	1/17	0.35495		1	2.31134	ANXA1	.
				positive regulation of stem cell proliferation (GO:2000648)	1/17	0.35495		1	2.31134	PTPRC	.
				maturation of 5.8S rRNA (GO:0000460)	1/17	0.35495		1	2.31134	NSA2	.
				negative regulation of intracellular transport (GO:0032387)	1/17	0.35495		1	2.31134	SLC25A5	.
				negative regulation of cellular carbohydrate metabolic process (GO:0010677)	1/17	0.35495		1	2.31134	PLEK	.
				DNA replication checkpoint (GO:0000076)	1/17	0.35495		1	2.31134	TOPBP1	.
				response to purine-containing compound (GO:0014074)	1/17	0.35495		1	2.31134	STAT1	.
				positive regulation of natural killer cell mediated cytotoxicity (GO:0045954)	1/17	0.35495		1	2.31134	GYPC	.
				macrophage activation (GO:0042116)	1/17	0.35495		1	2.31134	AIF1	.
				heterocycle biosynthetic process (GO:0018130)	1/17	0.35495		1	2.31134	MOCS2	.
				chaperone-mediated protein complex assembly (GO:0051131)	1/17	0.35495		1	2.31134	PTGES3	.
				positive regulation by host of viral transcription (GO:0043923)	1/17	0.35495		1	2.31134	GTF2B	.
				positive chemotaxis (GO:0050918)	1/17	0.35495		1	2.31134	PTPRJ	.
				synaptic vesicle transport (GO:0048489)	1/17	0.35495		1	2.31134	RAB27A	.
				positive regulation of cation transmembrane transport (GO:1904064)	1/17	0.35495		1	2.31134	CTSS	.
				platelet-derived growth factor receptor signaling pathway (GO:0048008)	1/17	0.35495		1	2.31134	PTPRJ	.
				positive regulation of transcription of Notch receptor target (GO:0007221)	1/17	0.35495		1	2.31134	STAT1	.
				cellular response to glucocorticoid stimulus (GO:0071385)	1/17	0.35495		1	2.31134	ANXA1	.
				viral entry into host cell (GO:0046718)	1/17	0.35495		1	2.31134	ITCH	.
				cellular monovalent inorganic cation homeostasis (GO:0030004)	1/17	0.35495		1	2.31134	ATP1B3	.
				mitotic G2 DNA damage checkpoint (GO:0007095)	1/17	0.35495		1	2.31134	TOPBP1	.
				male gamete generation (GO:0048232)	5/154	0.355103		1	1.27574	HERC4;TSGA10;XRN2;TDRD7;TCFL5	.
				establishment of protein localization to mitochondrion (GO:0072655)	2/49	0.355537		1	1.60378	TOMM70;TIMM23	.
				brain development (GO:0007420)	4/119	0.359235		1	1.32076	SRR;RAB18;BBS4;PAFAH1B2	.
				protein modification process (GO:0036211)	3/84	0.361096		1	1.40331	USP25;RABGGTB;PIGH	.
				fatty acid oxidation (GO:0019395)	2/50	0.364758		1	1.57171	SLC25A17;PEX13	.
				blood circulation (GO:0008015)	2/50	0.364758		1	1.57171	CXCL10;STAT1	.
				Golgi organization (GO:0007030)	4/121	0.370816		1	1.29893	ATP8B4;TICAM2;GCC2;VRK1	.
				porphyrin-containing compound biosynthetic process (GO:0006779)	1/18	0.371381		1	2.18293	ALAS1	.
				regulation of telomerase RNA localization to Cajal body (GO:1904872)	1/18	0.371381		1	2.18293	PARN	.
				membrane protein ectodomain proteolysis (GO:0006509)	1/18	0.371381		1	2.18293	SPPL2A	.
				iron-sulfur cluster assembly (GO:0016226)	1/18	0.371381		1	2.18293	HSPA9	.
				regulation of spindle organization (GO:0090224)	1/18	0.371381		1	2.18293	BORA	.
				nuclear envelope reassembly (GO:0031468)	1/18	0.371381		1	2.18293	VRK1	.
				actin filament polymerization (GO:0030041)	1/18	0.371381		1	2.18293	AIF1	.
				anion transmembrane transport (GO:0098656)	1/18	0.371381		1	2.18293	SLC25A16	.
				endoplasmic reticulum calcium ion homeostasis (GO:0032469)	1/18	0.371381		1	2.18293	TMCO1	.
				maintenance of protein localization in organelle (GO:0072595)	1/18	0.371381		1	2.18293	BBS4	.
				regulation of lipopolysaccharide-mediated signaling pathway (GO:0031664)	1/18	0.371381		1	2.18293	CD180	.
				negative regulation of protein dephosphorylation (GO:0035308)	1/18	0.371381		1	2.18293	YWHAE	.
				prostaglandin biosynthetic process (GO:0001516)	1/18	0.371381		1	2.18293	PTGES3	.
				dolichol-linked oligosaccharide biosynthetic process (GO:0006488)	1/18	0.371381		1	2.18293	ALG14	.
				phosphatidylglycerol acyl-chain remodeling (GO:0036148)	1/18	0.371381		1	2.18293	PLA2G4A	.
				regulation of cAMP-mediated signaling (GO:0043949)	1/18	0.371381		1	2.18293	CXCL10	.
				negative regulation of protein transport (GO:0051224)	1/18	0.371381		1	2.18293	RSAD2	.
				regulation of epithelial cell differentiation (GO:0030856)	1/18	0.371381		1	2.18293	RHEB	.
				regulation of peptidase activity (GO:0052547)	1/18	0.371381		1	2.18293	PSMA3	.
				regulation of dendrite extension (GO:1903859)	1/18	0.371381		1	2.18293	PLAA	.
				snRNA metabolic process (GO:0016073)	1/18	0.371381		1	2.18293	INTS8	.
				response to organophosphorus (GO:0046683)	1/18	0.371381		1	2.18293	STAT1	.
				negative regulation of calcium-mediated signaling (GO:0050849)	1/18	0.371381		1	2.18293	PLEK	.
				arachidonic acid metabolic process (GO:0019369)	2/51	0.373928		1	1.54089	PTGES3;PLA2G4A	.
				positive regulation of developmental growth (GO:0048639)	2/51	0.373928		1	1.54089	GOLGA4;PLAA	.
				regulation of programmed cell death (GO:0043067)	8/268	0.374009		1	1.17292	CASP8;OPA1;STAT1;FAS;SGK3;RABGGTB;TANK;BIRC3	.
				calcium ion transmembrane transport (GO:0070588)	3/86	0.374993		1	1.37068	MICU2;MCU;TMCO1	.
				cellular calcium ion homeostasis (GO:0006874)	4/123	0.382383		1	1.27781	YWHAE;MICU2;MCU;TMCO1	.
				positive regulation of proteolysis (GO:0045862)	2/52	0.383044		1	1.51126	CASP8;TANK	.
				positive regulation of secretion by cell (GO:1903532)	2/52	0.383044		1	1.51126	RAB27A;DNM1L	.
				Golgi vesicle transport (GO:0048193)	8/271	0.385592		1	1.15993	TRAPPC2;DCTN6;TICAM2;COG5;TRAPPC6B;COPB1;GCC2;IER3IP1	.
				protein import into mitochondrial matrix (GO:0030150)	1/19	0.387393		1	2.06804	TIMM23	.
				regulation of protein kinase A signaling (GO:0010738)	1/19	0.387393		1	2.06804	AKAP7	.
				negative regulation of phosphate metabolic process (GO:0045936)	1/19	0.387393		1	2.06804	PLEK	.
				production of small RNA involved in gene silencing by RNA (GO:0070918)	1/19	0.387393		1	2.06804	MRPL44	.
				morphogenesis of an epithelium (GO:0002009)	1/19	0.387393		1	2.06804	ARHGAP12	.
				negative regulation of response to biotic stimulus (GO:0002832)	1/19	0.387393		1	2.06804	ITCH	.
				ribosomal small subunit assembly (GO:0000028)	1/19	0.387393		1	2.06804	RPS27L	.
				extrinsic apoptotic signaling pathway in absence of ligand (GO:0097192)	1/19	0.387393		1	2.06804	BCL2A1	.
				folic acid metabolic process (GO:0046655)	1/19	0.387393		1	2.06804	SLC25A32	.
				histone deubiquitination (GO:0016578)	1/19	0.387393		1	2.06804	USP3	.
				fatty-acyl-CoA metabolic process (GO:0035337)	1/19	0.387393		1	2.06804	FAR2	.
				regulation of neuron migration (GO:2001222)	1/19	0.387393		1	2.06804	PLAA	.
				macromolecule biosynthetic process (GO:0009059)	1/19	0.387393		1	2.06804	PTPRC	.
				regulation of platelet activation (GO:0010543)	1/19	0.387393		1	2.06804	PLEK	.
				positive regulation of phospholipase activity (GO:0010518)	1/19	0.387393		1	2.06804	PLAA	.
				aspartate family amino acid catabolic process (GO:0009068)	1/19	0.387393		1	2.06804	DLD	.
				negative regulation of calcium ion transport (GO:0051926)	1/19	0.387393		1	2.06804	YWHAE	.
				positive regulation of adherens junction organization (GO:1903393)	1/19	0.387393		1	2.06804	PTPRJ	.
				positive regulation of transcription regulatory region DNA binding (GO:2000679)	1/19	0.387393		1	2.06804	GTF2B	.
				mitochondrial membrane organization (GO:0007006)	1/19	0.387393		1	2.06804	OPA1	.
				positive regulation of axon extension (GO:0045773)	1/19	0.387393		1	2.06804	GOLGA4	.
				regulation of proteasomal ubiquitin-dependent protein catabolic process (GO:0032434)	3/88	0.388828		1	1.33952	NUB1;TAF9;GLMN	.
				regulation of intracellular signal transduction (GO:1902531)	12/422	0.388932		1	1.11733	TIAM2;RAD50;RHOT1;MRE11;TMBIM4;RMI1;TAF9;RHOH;AKAP7;TOPBP1;BIRC3;ARHGAP12	.
				protein dephosphorylation (GO:0006470)	4/125	0.393925		1	1.25737	DUSP11;PTPRC;PTPRJ;PTPN12	.
				protein targeting to mitochondrion (GO:0006626)	2/54	0.401101		1	1.45529	TOMM70;TIMM23	.
				positive regulation of immune response (GO:0050778)	2/54	0.401101		1	1.45529	GBP5;PTPRC	.
				glycosphingolipid metabolic process (GO:0006687)	2/54	0.401101		1	1.45529	UGCG;ASAH1	.
				regulation of cell cycle process (GO:0010564)	3/90	0.402587		1	1.30976	KLHL9;BORA;BBS4	.
				regulation of JNK cascade (GO:0046328)	3/90	0.402587		1	1.30976	ITCH;AIDA;ZMYND11	.
				regulation of vacuole organization (GO:0044088)	1/20	0.402999		1	1.96464	IFT20	.
				cell projection assembly (GO:0030031)	1/20	0.402999		1	1.96464	RHOH	.
				embryonic digestive tract development (GO:0048566)	1/20	0.402999		1	1.96464	STRA6	.
				regulation of DNA-templated transcription, elongation (GO:0032784)	1/20	0.402999		1	1.96464	ZMYND11	.
				intrinsic apoptotic signaling pathway in response to DNA damage by p53 class mediator (GO:0042771)	1/20	0.402999		1	1.96464	RPS27L	.
				regulation of cell development (GO:0060284)	1/20	0.402999		1	1.96464	RHEB	.
				organelle disassembly (GO:1903008)	1/20	0.402999		1	1.96464	VRK1	.
				regulation of toll-like receptor signaling pathway (GO:0034121)	1/20	0.402999		1	1.96464	BIRC3	.
				steroid hormone mediated signaling pathway (GO:0043401)	1/20	0.402999		1	1.96464	MED17	.
				dorsal/ventral pattern formation (GO:0009953)	1/20	0.402999		1	1.96464	AIDA	.
				negative regulation of interferon-gamma production (GO:0032689)	1/20	0.402999		1	1.96464	CD274	.
				cellular response to steroid hormone stimulus (GO:0071383)	1/20	0.402999		1	1.96464	URI1	.
				regulation of cell growth (GO:0001558)	6/201	0.404619		1	1.17292	URI1;ITCH;TAF9;PTPRJ;SGK3;CDKN2AIP	.
				positive regulation of gene expression (GO:0010628)	21/771	0.406193		1	1.07023	UTP15;DTX3L;ATMIN;STAT1;WDR75;RPS27L;RAB27A;YEATS4;PARP9;WDR43;MED17;NPAT;DNAJC2;FUBP1;TAF1A;NFE2L3;SMARCAD1;TFAM;RIOK2;UBE2V1;POLR2K	.
				cellular response to acid chemical (GO:0071229)	3/91	0.409434		1	1.29536	PDK3;LAMTOR3;LAMTOR5	.
				regulation of cellular catabolic process (GO:0031329)	2/55	0.410035		1	1.42883	DRAM1;DRAM2	.
				regulation of gene silencing by RNA (GO:0060966)	2/55	0.410035		1	1.42883	POLR2K;NUP37	.
				regulation of posttranscriptional gene silencing (GO:0060147)	2/55	0.410035		1	1.42883	POLR2K;NUP37	.
				positive regulation of DNA biosynthetic process (GO:2000573)	2/55	0.410035		1	1.42883	PTGES3;PARN	.
				Notch signaling pathway (GO:0007219)	2/55	0.410035		1	1.42883	ITCH;STAT1	.
				positive regulation of mitochondrion organization (GO:0010822)	4/128	0.411173		1	1.2279	UGCG;TNFSF10;WDR75;DNM1L	.
				positive regulation of NF-kappaB transcription factor activity (GO:0051092)	4/128	0.411173		1	1.2279	PSMA6;UBE2V1;TRIM38;TANK	.
				regulation of inflammatory response (GO:0050727)	5/166	0.41569		1	1.18352	PSMA6;ANXA1;CASP4;PIK3AP1;BIRC3	.
				establishment of protein localization to vacuole (GO:0072666)	1/21	0.418208		1	1.87108	VPS36	.
				positive regulation of leukocyte cell-cell adhesion (GO:1903039)	1/21	0.418208		1	1.87108	CD47	.
				cortical actin cytoskeleton organization (GO:0030866)	1/21	0.418208		1	1.87108	PLEK	.
				cellular response to hexose stimulus (GO:0071331)	1/21	0.418208		1	1.87108	PDK3	.
				cellular protein complex localization (GO:0034629)	1/21	0.418208		1	1.87108	GPN3	.
				histone ubiquitination (GO:0016574)	1/21	0.418208		1	1.87108	DTX3L	.
				negative regulation of ion transmembrane transporter activity (GO:0032413)	1/21	0.418208		1	1.87108	YWHAE	.
				phospholipid translocation (GO:0045332)	1/21	0.418208		1	1.87108	ATP8B4	.
				zinc II ion transport (GO:0006829)	1/21	0.418208		1	1.87108	SLC30A6	.
				negative regulation of G-protein coupled receptor protein signaling pathway (GO:0045744)	1/21	0.418208		1	1.87108	PLEK	.
				branched-chain amino acid catabolic process (GO:0009083)	1/21	0.418208		1	1.87108	DLD	.
				vesicle docking (GO:0048278)	1/21	0.418208		1	1.87108	STX8	.
				regulation of nuclear division (GO:0051783)	1/21	0.418208		1	1.87108	BORA	.
				non-motile cilium assembly (GO:1905515)	1/21	0.418208		1	1.87108	BBS4	.
				negative regulation of viral process (GO:0048525)	1/21	0.418208		1	1.87108	STAT1	.
				lipid catabolic process (GO:0016042)	1/21	0.418208		1	1.87108	HSD11B1	.
				positive regulation of receptor internalization (GO:0002092)	1/21	0.418208		1	1.87108	ATAD1	.
				phosphatidylserine acyl-chain remodeling (GO:0036150)	1/21	0.418208		1	1.87108	PLA2G4A	.
				negative regulation of cell cycle arrest (GO:0071157)	1/21	0.418208		1	1.87108	EVI2B	.
				chromosome organization (GO:0051276)	2/56	0.418904		1	1.40331	COPS4;XPA	.
				regulation of secretion by cell (GO:1903530)	2/56	0.418904		1	1.40331	ANXA1;RAB37	.
				cellular defense response (GO:0006968)	2/56	0.418904		1	1.40331	LY96;CCR5	.
				protein localization to plasma membrane (GO:0072659)	4/130	0.422616		1	1.20901	GOLGA4;RAB37;ATP1B3;GOLGA7	.
				regulation of glycolytic process (GO:0006110)	2/57	0.427704		1	1.37869	ECD;NUP37	.
				peptidyl-S-diacylglycerol-L-cysteine biosynthetic process from peptidyl-cysteine (GO:0018231)	1/22	0.43303		1	1.78603	GOLGA7	.
				peptidyl-L-cysteine S-palmitoylation (GO:0018230)	1/22	0.43303		1	1.78603	GOLGA7	.
				early endosome to late endosome transport (GO:0045022)	1/22	0.43303		1	1.78603	STX8	.
				lipid translocation (GO:0034204)	1/22	0.43303		1	1.78603	ATP8B4	.
				nuclear transport (GO:0051169)	1/22	0.43303		1	1.78603	RSRC1	.
				negative regulation of myeloid cell differentiation (GO:0045638)	1/22	0.43303		1	1.78603	HSPA9	.
				positive regulation of interleukin-10 production (GO:0032733)	1/22	0.43303		1	1.78603	CD274	.
				positive regulation of erythrocyte differentiation (GO:0045648)	1/22	0.43303		1	1.78603	STAT1	.
				rRNA modification (GO:0000154)	1/22	0.43303		1	1.78603	MRPL1	.
				phosphatidylglycerol metabolic process (GO:0046471)	1/22	0.43303		1	1.78603	PLA2G4A	.
				regulation of cytokine production involved in inflammatory response (GO:1900015)	1/22	0.43303		1	1.78603	GBP5	.
				branched-chain amino acid metabolic process (GO:0009081)	1/22	0.43303		1	1.78603	DLD	.
				positive regulation of biosynthetic process (GO:0009891)	1/22	0.43303		1	1.78603	RAB27A	.
				regulation of ERBB signaling pathway (GO:1901184)	1/22	0.43303		1	1.78603	PTPN12	.
				cellular response to unfolded protein (GO:0034620)	1/22	0.43303		1	1.78603	HSPA9	.
				positive regulation of phosphatase activity (GO:0010922)	1/22	0.43303		1	1.78603	PLEK	.
				NLS-bearing protein import into nucleus (GO:0006607)	1/22	0.43303		1	1.78603	FYB1	.
				response to light stimulus (GO:0009416)	2/58	0.436434		1	1.35492	USP1;ERCC8	.
				regulation of epidermal growth factor receptor signaling pathway (GO:0042058)	2/58	0.436434		1	1.35492	PTPRJ;PTPN12	.
				integrin-mediated signaling pathway (GO:0007229)	2/58	0.436434		1	1.35492	PLEK;CD47	.
				post-Golgi vesicle-mediated transport (GO:0006892)	2/58	0.436434		1	1.35492	VPS54;EXOC6	.
				renal system development (GO:0072001)	2/59	0.445092		1	1.33196	STAT1;STRA6	.
				mitotic G2/M transition checkpoint (GO:0044818)	1/23	0.447475		1	1.70838	TOPBP1	.
				regulation of protein oligomerization (GO:0032459)	1/23	0.447475		1	1.70838	DNM1L	.
				positive regulation of cell cycle G1/S phase transition (GO:1902808)	1/23	0.447475		1	1.70838	AIF1	.
				regulation of telomere capping (GO:1904353)	1/23	0.447475		1	1.70838	RAD50	.
				regulation of transcription elongation from RNA polymerase II promoter (GO:0034243)	1/23	0.447475		1	1.70838	ZMYND11	.
				cellular amino acid catabolic process (GO:0009063)	1/23	0.447475		1	1.70838	DLD	.
				TOR signaling (GO:0031929)	1/23	0.447475		1	1.70838	SYAP1	.
				zinc II ion transmembrane transport (GO:0071577)	1/23	0.447475		1	1.70838	SLC30A6	.
				glutamine family amino acid metabolic process (GO:0009064)	1/23	0.447475		1	1.70838	NIT2	.
				positive regulation of mRNA catabolic process (GO:0061014)	1/23	0.447475		1	1.70838	PNPT1	.
				vitamin transport (GO:0051180)	1/23	0.447475		1	1.70838	SLC25A32	.
				vesicle-mediated transport between endosomal compartments (GO:0098927)	1/23	0.447475		1	1.70838	STX8	.
				peroxisome organization (GO:0007031)	1/23	0.447475		1	1.70838	DNM1L	.
				regulation of interleukin-8 secretion (GO:2000482)	1/23	0.447475		1	1.70838	ANXA1	.
				folic acid-containing compound metabolic process (GO:0006760)	1/23	0.447475		1	1.70838	SLC25A32	.
				cellular response to interleukin-6 (GO:0071354)	1/23	0.447475		1	1.70838	STAT1	.
				cellular response to amyloid-beta (GO:1904646)	1/23	0.447475		1	1.70838	CASP4	.
				positive regulation of cell junction assembly (GO:1901890)	1/23	0.447475		1	1.70838	PTPRJ	.
				regulation of ion homeostasis (GO:2000021)	1/23	0.447475		1	1.70838	SLC30A6	.
				cellular protein localization (GO:0034613)	9/327	0.453238		1	1.08145	TICAM2;RAB37;STX8;RABL3;RAB18;RAB27A;RAB28;LAMTOR3;BBS4	.
				membrane protein intracellular domain proteolysis (GO:0031293)	1/24	0.461553		1	1.6372	SPPL2A	.
				cellular lipid catabolic process (GO:0044242)	1/24	0.461553		1	1.6372	ACBD5	.
				histone monoubiquitination (GO:0010390)	1/24	0.461553		1	1.6372	DTX3L	.
				response to glucocorticoid (GO:0051384)	1/24	0.461553		1	1.6372	ANXA1	.
				histone mRNA metabolic process (GO:0008334)	1/24	0.461553		1	1.6372	SSB	.
				negative regulation of sequestering of calcium ion (GO:0051283)	1/24	0.461553		1	1.6372	PTPRC	.
				regulation of actin filament bundle assembly (GO:0032231)	1/24	0.461553		1	1.6372	PLEK	.
				camera-type eye development (GO:0043010)	1/24	0.461553		1	1.6372	STRA6	.
				regulation of chemotaxis (GO:0050920)	1/24	0.461553		1	1.6372	USP14	.
				negative regulation of oxidative stress-induced cell death (GO:1903202)	1/24	0.461553		1	1.6372	TXN	.
				positive regulation of dephosphorylation (GO:0035306)	1/24	0.461553		1	1.6372	CNEP1R1	.
				mRNA splice site selection (GO:0006376)	1/24	0.461553		1	1.6372	SF3A3	.
				fatty acid derivative biosynthetic process (GO:1901570)	1/24	0.461553		1	1.6372	FAR2	.
				transition metal ion homeostasis (GO:0055076)	1/24	0.461553		1	1.6372	B2M	.
				negative regulation of intrinsic apoptotic signaling pathway in response to DNA damage (GO:1902230)	1/24	0.461553		1	1.6372	TAF9	.
				regulation of cellular senescence (GO:2000772)	1/24	0.461553		1	1.6372	PNPT1	.
				positive regulation of leukocyte chemotaxis (GO:0002690)	2/61	0.46218		1	1.28829	CXCL10;AIF1	.
				protein targeting to membrane (GO:0006612)	2/61	0.46218		1	1.28829	SRP14;GOLGA7	.
				negative regulation of MAP kinase activity (GO:0043407)	2/61	0.46218		1	1.28829	PTPRJ;AIDA	.
				small GTPase mediated signal transduction (GO:0007264)	3/99	0.463217		1	1.19069	USP8;RIT1;RAB18	.
				second-messenger-mediated signaling (GO:0019932)	2/62	0.470608		1	1.26751	CCR5;MCU	.
				cellular response to growth factor stimulus (GO:0071363)	4/139	0.47332		1	1.13073	URI1;ANXA1;SYAP1;PTPN12	.
				signal peptide processing (GO:0006465)	1/25	0.475273		1	1.57171	SPPL2A	.
				potassium ion homeostasis (GO:0055075)	1/25	0.475273		1	1.57171	ATP1B3	.
				response to amyloid-beta (GO:1904645)	1/25	0.475273		1	1.57171	CASP4	.
				regulation of interleukin-10 production (GO:0032653)	1/25	0.475273		1	1.57171	CD274	.
				RNA splicing, via transesterification reactions (GO:0000375)	1/25	0.475273		1	1.57171	SF3A3	.
				response to alcohol (GO:0097305)	1/25	0.475273		1	1.57171	CCR5	.
				monocarboxylic acid catabolic process (GO:0072329)	1/25	0.475273		1	1.57171	ACBD5	.
				regulation of glucose metabolic process (GO:0010906)	1/25	0.475273		1	1.57171	PDK3	.
				negative regulation of cellular protein localization (GO:1903828)	1/25	0.475273		1	1.57171	LEPROTL1	.
				cellular response to vascular endothelial growth factor stimulus (GO:0035924)	1/25	0.475273		1	1.57171	ANXA1	.
				female gamete generation (GO:0007292)	1/25	0.475273		1	1.57171	PARN	.
				regulation of apoptotic signaling pathway (GO:2001233)	1/25	0.475273		1	1.57171	FAS	.
				ncRNA 3'-end processing (GO:0043628)	1/25	0.475273		1	1.57171	SSB	.
				respiratory tube development (GO:0030323)	1/25	0.475273		1	1.57171	STRA6	.
				positive regulation of calcium ion transmembrane transport (GO:1904427)	1/25	0.475273		1	1.57171	CXCL10	.
				signal transduction in response to DNA damage (GO:0042770)	1/25	0.475273		1	1.57171	CEP63	.
				regulation of protein import into nucleus (GO:0042306)	1/25	0.475273		1	1.57171	TXN	.
				response to lipid (GO:0033993)	4/140	0.478856		1	1.12265	CXCL10;SRR;LY96;FAS	.
				regulation of small GTPase mediated signal transduction (GO:0051056)	4/140	0.478856		1	1.12265	TIAM2;RHOT1;RHOH;ARHGAP12	.
				vesicle coating (GO:0006901)	2/63	0.478957		1	1.24739	TRAPPC2;TRAPPC6B	.
				COPII vesicle coating (GO:0048208)	2/63	0.478957		1	1.24739	TRAPPC2;TRAPPC6B	.
				iron ion homeostasis (GO:0055072)	2/63	0.478957		1	1.24739	ATP6V1G1;B2M	.
				vesicle targeting, rough ER to cis-Golgi (GO:0048207)	2/63	0.478957		1	1.24739	TRAPPC2;TRAPPC6B	.
				regulation of proteolysis (GO:0030162)	2/63	0.478957		1	1.24739	ITCH;CASP8	.
				ribosomal large subunit biogenesis (GO:0042273)	2/63	0.478957		1	1.24739	NSA2;MRPL1	.
				positive regulation of programmed cell death (GO:0043068)	7/257	0.481488		1	1.07023	TIAM2;BCL2A1;TNFSF10;FAS;DNM1L;ITGB3BP;IFIT2	.
				glycerophospholipid metabolic process (GO:0006650)	2/64	0.487224		1	1.2279	PLEK;PIGH	.
				positive regulation of endocytosis (GO:0045807)	2/64	0.487224		1	1.2279	RAB27A;B2M	.
				positive regulation of cell adhesion (GO:0045785)	2/64	0.487224		1	1.2279	PTPRJ;CD47	.
				sodium ion homeostasis (GO:0055078)	1/26	0.488644		1	1.51126	ATP1B3	.
				positive regulation of cyclin-dependent protein kinase activity (GO:1904031)	1/26	0.488644		1	1.51126	CCNH	.
				apoptotic cell clearance (GO:0043277)	1/26	0.488644		1	1.51126	RHOH	.
				response to growth factor (GO:0070848)	1/26	0.488644		1	1.51126	URI1	.
				snRNA processing (GO:0016180)	1/26	0.488644		1	1.51126	INTS8	.
				positive regulation of interferon-beta production (GO:0032728)	1/26	0.488644		1	1.51126	IFIH1	.
				negative regulation of catalytic activity (GO:0043086)	1/26	0.488644		1	1.51126	PARP9	.
				positive regulation of cAMP metabolic process (GO:0030816)	1/26	0.488644		1	1.51126	CXCL10	.
				regulation of transcription involved in G1/S transition of mitotic cell cycle (GO:0000083)	1/26	0.488644		1	1.51126	NPAT	.
				regulation of viral entry into host cell (GO:0046596)	1/26	0.488644		1	1.51126	TRIM38	.
				phosphatidylethanolamine acyl-chain remodeling (GO:0036152)	1/26	0.488644		1	1.51126	PLA2G4A	.
				GPI anchor metabolic process (GO:0006505)	1/26	0.488644		1	1.51126	PIGH	.
				regulation of T cell receptor signaling pathway (GO:0050856)	1/26	0.488644		1	1.51126	PTPRJ	.
				endocrine system development (GO:0035270)	1/26	0.488644		1	1.51126	STRA6	.
				regulation of rhodopsin mediated signaling pathway (GO:0022400)	1/26	0.488644		1	1.51126	FNTA	.
				RNA biosynthetic process (GO:0032774)	1/26	0.488644		1	1.51126	MTERF1	.
				positive regulation of cytokine production (GO:0001819)	6/220	0.489823		1	1.07162	GBP5;ANXA1;MRE11;GLMN;TANK;POLR2K	.
				organonitrogen compound biosynthetic process (GO:1901566)	5/181	0.489939		1	1.08543	MOCS2;LPCAT2;PLA2G4A;DEGS1;SPTSSA	.
				positive regulation of protein modification by small protein conjugation or removal (GO:1903322)	2/65	0.495409		1	1.20901	TANK;BIRC3	.
				negative regulation of blood vessel morphogenesis (GO:2000181)	2/65	0.495409		1	1.20901	STAT1;SARS	.
				phagocytosis, engulfment (GO:0006911)	3/104	0.495731		1	1.13344	RHOH;AIF1;ARHGAP12	.
				cellular protein complex assembly (GO:0043623)	4/144	0.500767		1	1.09146	PTGES3;POMP;TBCC;PSMG2	.
				regulation of calcium ion transmembrane transporter activity (GO:1901019)	1/27	0.501675		1	1.45529	YWHAE	.
				mRNA polyadenylation (GO:0006378)	1/27	0.501675		1	1.45529	PNPT1	.
				regulation of intracellular steroid hormone receptor signaling pathway (GO:0033143)	1/27	0.501675		1	1.45529	UBA5	.
				negative regulation of smooth muscle cell proliferation (GO:0048662)	1/27	0.501675		1	1.45529	AIF1	.
				negative regulation of synaptic transmission (GO:0050805)	1/27	0.501675		1	1.45529	ATAD1	.
				modulation by host of viral transcription (GO:0043921)	1/27	0.501675		1	1.45529	GTF2B	.
				transcription from RNA polymerase III promoter (GO:0006383)	1/27	0.501675		1	1.45529	POLR2K	.
				release of sequestered calcium ion into cytosol (GO:0051209)	1/27	0.501675		1	1.45529	PTPRC	.
				extrinsic apoptotic signaling pathway via death domain receptors (GO:0008625)	1/27	0.501675		1	1.45529	CASP8	.
				phosphatidylserine metabolic process (GO:0006658)	1/27	0.501675		1	1.45529	PLA2G4A	.
				positive regulation of substrate adhesion-dependent cell spreading (GO:1900026)	1/27	0.501675		1	1.45529	OLFM4	.
				protein targeting to vacuole (GO:0006623)	1/27	0.501675		1	1.45529	GCC2	.
				regulation of vascular endothelial growth factor production (GO:0010574)	1/27	0.501675		1	1.45529	SARS	.
				regulation of protein localization to cell surface (GO:2000008)	1/27	0.501675		1	1.45529	LEPROTL1	.
				cellular response to topologically incorrect protein (GO:0035967)	1/27	0.501675		1	1.45529	HSPA9	.
				cellular response to glucose stimulus (GO:0071333)	1/27	0.501675		1	1.45529	PDK3	.
				purine ribonucleotide metabolic process (GO:0009150)	2/66	0.50351		1	1.19069	OPA1;AK3	.
				positive regulation of cellular protein localization (GO:1903829)	2/66	0.50351		1	1.19069	DTX3L;PARP9	.
				positive regulation of cellular catabolic process (GO:0031331)	3/106	0.508459		1	1.11206	ITCH;PNPT1;DTX3L	.
				regulation of gene silencing by miRNA (GO:0060964)	2/67	0.511527		1	1.17292	POLR2K;NUP37	.
				cellular response to UV (GO:0034644)	2/67	0.511527		1	1.17292	XPA;EIF2S1	.
				RNA polyadenylation (GO:0043631)	1/28	0.514374		1	1.40331	PNPT1	.
				hydrogen ion transmembrane transport (GO:1902600)	1/28	0.514374		1	1.40331	ATP6V1E1	.
				negative regulation of homeostatic process (GO:0032845)	1/28	0.514374		1	1.40331	HSPA9	.
				regulation of mRNA processing (GO:0050684)	1/28	0.514374		1	1.40331	SRPK1	.
				regulation of receptor internalization (GO:0002090)	1/28	0.514374		1	1.40331	ATAD1	.
				positive regulation of sprouting angiogenesis (GO:1903672)	1/28	0.514374		1	1.40331	ANXA1	.
				production of miRNAs involved in gene silencing by miRNA (GO:0035196)	1/28	0.514374		1	1.40331	MRPL44	.
				antigen processing and presentation of peptide antigen via MHC class I (GO:0002474)	1/28	0.514374		1	1.40331	B2M	.
				positive regulation of lipid biosynthetic process (GO:0046889)	1/28	0.514374		1	1.40331	CNEP1R1	.
				ventricular septum development (GO:0003281)	1/28	0.514374		1	1.40331	STRA6	.
				primary neural tube formation (GO:0014020)	1/28	0.514374		1	1.40331	BBS4	.
				regulation of protein secretion (GO:0050708)	3/107	0.51476		1	1.10167	RSAD2;DNM1L;SLC25A5	.
				protein sumoylation (GO:0016925)	2/68	0.519458		1	1.15567	IFIH1;NUP37	.
				monocarboxylic acid biosynthetic process (GO:0072330)	2/68	0.519458		1	1.15567	SRR;ASNSD1	.
				COPII-coated vesicle budding (GO:0090114)	2/68	0.519458		1	1.15567	TRAPPC2;TRAPPC6B	.
				positive regulation of apoptotic process (GO:0043065)	8/307	0.523043		1	1.02391	TIAM2;BCL2A1;TNFSF10;FAS;CYCS;DNM1L;ITGB3BP;IFIT2	.
				intracellular protein transport (GO:0006886)	9/347	0.524296		1	1.01912	TICAM2;RAB37;STX8;LAMP2;RABL3;RAB18;RAB27A;RAB28;VPS36	.
				dicarboxylic acid transport (GO:0006835)	1/29	0.526751		1	1.35492	SLC25A32	.
				tube closure (GO:0060606)	1/29	0.526751		1	1.35492	BBS4	.
				lung development (GO:0030324)	1/29	0.526751		1	1.35492	STRA6	.
				cardiac muscle cell action potential (GO:0086001)	1/29	0.526751		1	1.35492	YWHAE	.
				vacuolar transport (GO:0007034)	1/29	0.526751		1	1.35492	VPS54	.
				positive regulation of myeloid cell differentiation (GO:0045639)	1/29	0.526751		1	1.35492	STAT1	.
				positive regulation of transcription from RNA polymerase II promoter in response to stress (GO:0036003)	1/29	0.526751		1	1.35492	HSF2	.
				lysosome localization (GO:0032418)	1/29	0.526751		1	1.35492	MILR1	.
				B cell proliferation (GO:0042100)	1/29	0.526751		1	1.35492	PTPRC	.
				regulation of activated T cell proliferation (GO:0046006)	1/29	0.526751		1	1.35492	CD274	.
				MyD88-dependent toll-like receptor signaling pathway (GO:0002755)	1/29	0.526751		1	1.35492	LY96	.
				skeletal muscle organ development (GO:0060538)	1/29	0.526751		1	1.35492	STRA6	.
				respiratory system development (GO:0060541)	1/29	0.526751		1	1.35492	STRA6	.
				carbohydrate derivative biosynthetic process (GO:1901137)	1/29	0.526751		1	1.35492	SCCPDH	.
				striated muscle tissue development (GO:0014706)	1/29	0.526751		1	1.35492	NDUFV2	.
				negative regulation of angiogenesis (GO:0016525)	2/69	0.527303		1	1.13892	STAT1;SARS	.
				response to organic cyclic compound (GO:0014070)	2/69	0.527303		1	1.13892	GLDC;KYNU	.
				phospholipid metabolic process (GO:0006644)	2/70	0.535061		1	1.12265	PLA2G4A;PLAA	.
				calcium-mediated signaling (GO:0019722)	2/70	0.535061		1	1.12265	CCR5;MCU	.
				ribosomal large subunit assembly (GO:0000027)	1/30	0.538812		1	1.30976	FASTKD2	.
				regulation of cell migration involved in sprouting angiogenesis (GO:0090049)	1/30	0.538812		1	1.30976	ANXA1	.
				negative regulation of endothelial cell proliferation (GO:0001937)	1/30	0.538812		1	1.30976	STAT1	.
				hippo signaling (GO:0035329)	1/30	0.538812		1	1.30976	YWHAE	.
				replication fork processing (GO:0031297)	1/30	0.538812		1	1.30976	ETAA1	.
				positive regulation of cyclin-dependent protein serine/threonine kinase activity (GO:0045737)	1/30	0.538812		1	1.30976	CCNH	.
				negative regulation of transferase activity (GO:0051348)	1/30	0.538812		1	1.30976	DTX3L	.
				regulation of leukocyte chemotaxis (GO:0002688)	1/30	0.538812		1	1.30976	CXCL10	.
				activation of protein kinase B activity (GO:0032148)	1/30	0.538812		1	1.30976	TXN	.
				multivesicular body assembly (GO:0036258)	1/30	0.538812		1	1.30976	VPS36	.
				protein palmitoylation (GO:0018345)	1/30	0.538812		1	1.30976	GOLGA7	.
				regulation of cation transmembrane transport (GO:1904062)	1/30	0.538812		1	1.30976	HOMER1	.
				positive regulation of cation channel activity (GO:2001259)	1/30	0.538812		1	1.30976	CTSS	.
				regulation of intracellular estrogen receptor signaling pathway (GO:0033146)	1/30	0.538812		1	1.30976	UBA5	.
				artery morphogenesis (GO:0048844)	1/30	0.538812		1	1.30976	STRA6	.
				ATP-dependent chromatin remodeling (GO:0043044)	1/30	0.538812		1	1.30976	SMARCAD1	.
				regulation of blood coagulation (GO:0030193)	1/30	0.538812		1	1.30976	ENPP4	.
				CENP-A containing nucleosome assembly (GO:0034080)	1/30	0.538812		1	1.30976	ITGB3BP	.
				CENP-A containing chromatin organization (GO:0061641)	1/30	0.538812		1	1.30976	ITGB3BP	.
				positive regulation of reactive oxygen species biosynthetic process (GO:1903428)	1/30	0.538812		1	1.30976	RAB27A	.
				regulation of cell communication (GO:0010646)	2/71	0.542731		1	1.10684	ANXA1;BIRC3	.
				positive regulation of growth (GO:0045927)	2/71	0.542731		1	1.10684	TAF9;CDKN2AIP	.
				regulation of cation channel activity (GO:2001257)	2/71	0.542731		1	1.10684	HOMER1;CTSS	.
				phosphatidylinositol metabolic process (GO:0046488)	3/112	0.5456		1	1.05248	FIG4;PLEK;PLA2G4A	.
				regulation of neuron death (GO:1901214)	2/72	0.550312		1	1.09146	TANK;EIF2S1	.
				negative regulation of cysteine-type endopeptidase activity (GO:2000117)	2/72	0.550312		1	1.09146	YWHAE;LAMTOR5	.
				response to metal ion (GO:0010038)	2/72	0.550312		1	1.09146	SLC30A6;HOMER1	.
				Rho protein signal transduction (GO:0007266)	2/72	0.550312		1	1.09146	RHOT1;RHOH	.
				regulation of fat cell differentiation (GO:0045598)	2/72	0.550312		1	1.09146	ANKRD26;SYAP1	.
				positive regulation of ubiquitin-protein transferase activity (GO:0051443)	1/31	0.550567		1	1.26751	ARRDC4	.
				negative regulation of tumor necrosis factor superfamily cytokine production (GO:1903556)	1/31	0.550567		1	1.26751	CD274	.
				positive regulation of release of sequestered calcium ion into cytosol (GO:0051281)	1/31	0.550567		1	1.26751	CXCL10	.
				positive regulation of protein dephosphorylation (GO:0035307)	1/31	0.550567		1	1.26751	CNEP1R1	.
				renal water homeostasis (GO:0003091)	1/31	0.550567		1	1.26751	PRKACB	.
				regulation of protein export from nucleus (GO:0046825)	1/31	0.550567		1	1.26751	YWHAE	.
				positive regulation of insulin secretion (GO:0032024)	1/31	0.550567		1	1.26751	MCU	.
				regulation of cytokine secretion (GO:0050707)	1/31	0.550567		1	1.26751	GLMN	.
				proton transport (GO:0015992)	1/31	0.550567		1	1.26751	ATP6V1E1	.
				vesicle-mediated transport to the plasma membrane (GO:0098876)	1/31	0.550567		1	1.26751	EXOC6	.
				positive regulation of kinase activity (GO:0033674)	3/113	0.55163		1	1.04317	RAD50;MRE11;PTPRC	.
				B cell activation (GO:0042113)	2/73	0.557805		1	1.07651	CASP8;PTPRC	.
				lymphocyte differentiation (GO:0030098)	2/73	0.557805		1	1.07651	PTPRC;RHOH	.
				regulation of protein complex assembly (GO:0043254)	2/73	0.557805		1	1.07651	DNM1L;ANKRA2	.
				negative regulation of calcium ion transmembrane transporter activity (GO:1901020)	1/32	0.562023		1	1.2279	YWHAE	.
				positive regulation of calcium ion transport into cytosol (GO:0010524)	1/32	0.562023		1	1.2279	CXCL10	.
				response to zinc ion (GO:0010043)	1/32	0.562023		1	1.2279	SLC30A6	.
				cellular response to glucagon stimulus (GO:0071377)	1/32	0.562023		1	1.2279	PRKACB	.
				oxoacid metabolic process (GO:0043436)	1/32	0.562023		1	1.2279	PPA1	.
				chromatin remodeling at centromere (GO:0031055)	1/32	0.562023		1	1.2279	ITGB3BP	.
				regulation of potassium ion transmembrane transport (GO:1901379)	1/32	0.562023		1	1.2279	YWHAE	.
				GPI anchor biosynthetic process (GO:0006506)	1/32	0.562023		1	1.2279	PIGH	.
				positive regulation of tumor necrosis factor superfamily cytokine production (GO:1903557)	1/32	0.562023		1	1.2279	LY96	.
				regulation of cell-cell adhesion (GO:0022407)	1/32	0.562023		1	1.2279	CD47	.
				negative regulation of fat cell differentiation (GO:0045599)	1/32	0.562023		1	1.2279	ANKRD26	.
				G2 DNA damage checkpoint (GO:0031572)	1/32	0.562023		1	1.2279	TOPBP1	.
				positive regulation of telomere maintenance via telomerase (GO:0032212)	1/32	0.562023		1	1.2279	PARN	.
				vasculogenesis (GO:0001570)	1/32	0.562023		1	1.2279	GLMN	.
				regulation of G-protein coupled receptor protein signaling pathway (GO:0008277)	2/74	0.565209		1	1.06197	FNTA;PLEK	.
				chromatin remodeling (GO:0006338)	3/116	0.569432		1	1.01619	SP110;SMARCAD1;TFAM	.
				negative regulation of cellular amide metabolic process (GO:0034249)	2/75	0.572523		1	1.04781	ORMDL1;CNOT10	.
				positive regulation of cell-cell adhesion (GO:0022409)	1/33	0.573187		1	1.19069	CD47	.
				neural tube closure (GO:0001843)	1/33	0.573187		1	1.19069	BBS4	.
				stem cell differentiation (GO:0048863)	1/33	0.573187		1	1.19069	PTPRC	.
				positive regulation of cell-matrix adhesion (GO:0001954)	1/33	0.573187		1	1.19069	PTPRJ	.
				platelet aggregation (GO:0070527)	1/33	0.573187		1	1.19069	PLEK	.
				regulation of autophagosome assembly (GO:2000785)	1/33	0.573187		1	1.19069	IFT20	.
				positive regulation of intrinsic apoptotic signaling pathway (GO:2001244)	1/33	0.573187		1	1.19069	DNM1L	.
				exonucleolytic nuclear-transcribed mRNA catabolic process involved in deadenylation-dependent decay (GO:0043928)	1/33	0.573187		1	1.19069	LSM5	.
				carboxylic acid metabolic process (GO:0019752)	1/33	0.573187		1	1.19069	PLA2G4A	.
				positive regulation of nucleocytoplasmic transport (GO:0046824)	1/33	0.573187		1	1.19069	YWHAE	.
				negative regulation of multi-organism process (GO:0043901)	1/33	0.573187		1	1.19069	ITCH	.
				cellular glucose homeostasis (GO:0001678)	1/33	0.573187		1	1.19069	PDK3	.
				regulation of intracellular protein transport (GO:0033157)	1/33	0.573187		1	1.19069	GCC2	.
				positive regulation of cellular biosynthetic process (GO:0031328)	4/159	0.578974		1	0.988496	DBF4;CNEP1R1;RPS27L;NMD3	.
				hemopoiesis (GO:0030097)	2/76	0.579747		1	1.03402	PTPRC;PLEK	.
				positive regulation of leukocyte migration (GO:0002687)	1/34	0.584068		1	1.15567	CXCL10	.
				positive regulation of exocytosis (GO:0045921)	1/34	0.584068		1	1.15567	RAB27A	.
				regulation of wound healing (GO:0061041)	1/34	0.584068		1	1.15567	ANXA1	.
				response to peptide (GO:1901652)	1/34	0.584068		1	1.15567	STAT1	.
				positive regulation of telomere maintenance via telomere lengthening (GO:1904358)	1/34	0.584068		1	1.15567	PARN	.
				positive regulation of DNA binding (GO:0043388)	1/34	0.584068		1	1.15567	TXN	.
				bone development (GO:0060348)	1/34	0.584068		1	1.15567	PTPRC	.
				regulation of axon extension (GO:0030516)	1/34	0.584068		1	1.15567	GOLGA4	.
				endoplasmic reticulum organization (GO:0007029)	1/34	0.584068		1	1.15567	RAB18	.
				response to glucagon (GO:0033762)	1/34	0.584068		1	1.15567	PRKACB	.
				regulation of interferon-beta production (GO:0032648)	1/34	0.584068		1	1.15567	IFIH1	.
				cellular macromolecular complex assembly (GO:0034622)	1/34	0.584068		1	1.15567	TANK	.
				macromolecule catabolic process (GO:0009057)	1/34	0.584068		1	1.15567	PGA5	.
				positive regulation of B cell activation (GO:0050871)	3/119	0.586791		1	0.990573	PTPRC;PPP2R3C;TNFSF13B	.
				RNA export from nucleus (GO:0006405)	3/119	0.586791		1	0.990573	SSB;EIF4E;NUP37	.
				positive regulation of cytoskeleton organization (GO:0051495)	2/77	0.586881		1	1.02059	PLEK;RHOH	.
				regulation of cytokinesis (GO:0032465)	2/77	0.586881		1	1.02059	KLHL9;BBS4	.
				negative regulation of growth (GO:0045926)	3/120	0.592478		1	0.982318	PNPT1;PTPRJ;CDKN2AIP	.
				positive regulation of translation (GO:0045727)	2/78	0.593926		1	1.00751	TRMT10C;RPS27L	.
				regulation of heart rate by cardiac conduction (GO:0086091)	1/35	0.594671		1	1.12265	YWHAE	.
				positive regulation of NIK/NF-kappaB signaling (GO:1901224)	1/35	0.594671		1	1.12265	TANK	.
				nuclear-transcribed mRNA catabolic process, exonucleolytic (GO:0000291)	1/35	0.594671		1	1.12265	LSM5	.
				positive regulation of peptide secretion (GO:0002793)	1/35	0.594671		1	1.12265	DNM1L	.
				negative regulation of protein kinase B signaling (GO:0051898)	1/35	0.594671		1	1.12265	PTPRJ	.
				erythrocyte differentiation (GO:0030218)	1/35	0.594671		1	1.12265	HSPA9	.
				positive regulation of DNA replication (GO:0045740)	1/35	0.594671		1	1.12265	DBF4	.
				regulation of mitotic spindle organization (GO:0060236)	1/35	0.594671		1	1.12265	BORA	.
				maturation of SSU-rRNA from tricistronic rRNA transcript (SSU-rRNA, 5.8S rRNA, LSU-rRNA) (GO:0000462)	1/35	0.594671		1	1.12265	DCAF13	.
				cholesterol biosynthetic process (GO:0006695)	1/35	0.594671		1	1.12265	LBR	.
				regulation of ion transmembrane transport (GO:0034765)	1/35	0.594671		1	1.12265	YWHAE	.
				positive regulation of ATPase activity (GO:0032781)	1/35	0.594671		1	1.12265	ATP1B3	.
				membrane protein proteolysis (GO:0033619)	1/35	0.594671		1	1.12265	SPPL2A	.
				actin filament bundle organization (GO:0061572)	1/35	0.594671		1	1.12265	AIF1	.
				DNA-dependent DNA replication maintenance of fidelity (GO:0045005)	1/35	0.594671		1	1.12265	ETAA1	.
				steroid biosynthetic process (GO:0006694)	2/79	0.60088		1	0.994753	HSD11B1;LBR	.
				positive regulation of signal transduction (GO:0009967)	5/206	0.604742		1	0.953707	PTPRC;HOMER1;CD180;FAS;CDKN2AIP	.
				protein acylation (GO:0043543)	1/36	0.605005		1	1.09146	GTF2B	.
				actin polymerization or depolymerization (GO:0008154)	1/36	0.605005		1	1.09146	AIF1	.
				regulation of receptor-mediated endocytosis (GO:0048259)	1/36	0.605005		1	1.09146	B2M	.
				histone exchange (GO:0043486)	1/36	0.605005		1	1.09146	ITGB3BP	.
				muscle cell differentiation (GO:0042692)	1/36	0.605005		1	1.09146	GLMN	.
				organic hydroxy compound transport (GO:0015850)	1/36	0.605005		1	1.09146	STRA6	.
				lymphocyte proliferation (GO:0046651)	1/36	0.605005		1	1.09146	PTPRC	.
				natural killer cell activation (GO:0030101)	1/36	0.605005		1	1.09146	CASP8	.
				organophosphate biosynthetic process (GO:0090407)	1/36	0.605005		1	1.09146	MOCS2	.
				calcium ion transmembrane import into cytosol (GO:0097553)	1/36	0.605005		1	1.09146	PTPRC	.
				heart looping (GO:0001947)	1/36	0.605005		1	1.09146	BBS4	.
				histone deacetylation (GO:0016575)	1/36	0.605005		1	1.09146	SMARCAD1	.
				vesicle-mediated transport in synapse (GO:0099003)	1/36	0.605005		1	1.09146	RAB27A	.
				zymogen activation (GO:0031638)	1/36	0.605005		1	1.09146	CASP8	.
				centromere complex assembly (GO:0034508)	1/36	0.605005		1	1.09146	ITGB3BP	.
				axonal transport (GO:0098930)	1/36	0.605005		1	1.09146	OPA1	.
				inner mitochondrial membrane organization (GO:0007007)	1/36	0.605005		1	1.09146	OPA1	.
				glutamate receptor signaling pathway (GO:0007215)	1/36	0.605005		1	1.09146	HOMER1	.
				cardiac muscle tissue development (GO:0048738)	1/36	0.605005		1	1.09146	NDUFV2	.
				regulation of cysteine-type endopeptidase activity (GO:2000116)	1/36	0.605005		1	1.09146	BIRC3	.
				spermatid development (GO:0007286)	1/36	0.605005		1	1.09146	BBS4	.
				secondary alcohol biosynthetic process (GO:1902653)	1/36	0.605005		1	1.09146	LBR	.
				RNA transport (GO:0050658)	2/80	0.607744		1	0.982318	PNPT1;EIF4E	.
				regulation of phosphatidylinositol 3-kinase signaling (GO:0014066)	2/80	0.607744		1	0.982318	STAMBP;PIK3AP1	.
				ERBB signaling pathway (GO:0038127)	2/80	0.607744		1	0.982318	CUL5;PTPN12	.
				cellular response to hormone stimulus (GO:0032870)	2/80	0.607744		1	0.982318	URI1;CTSS	.
				regulation of mitotic cell cycle (GO:0007346)	4/165	0.608234		1	0.952551	BTG3;BORA;DYNLT3;EIF4E	.
				positive regulation of phosphorylation (GO:0042327)	5/208	0.613277		1	0.944537	RAD50;MRE11;PTGES3;GLMN;FAS	.
				cellular response to cytokine stimulus (GO:0071345)	11/456	0.614433		1	0.947851	CXCL10;ANXA1;PNPT1;STAT1;STAT2;IL2RB;PTPN12;IFIT1;CCR5;TANK;AIF1	.
				positive regulation of protein targeting to mitochondrion (GO:1903955)	2/81	0.614518		1	0.970191	UGCG;WDR75	.
				negative regulation of cell death (GO:0060548)	2/81	0.614518		1	0.970191	TXNDC12;TANK	.
				negative regulation of cell cycle process (GO:0010948)	2/81	0.614518		1	0.970191	MRE11;EVI2B	.
				dephosphorylation (GO:0016311)	3/124	0.614711		1	0.950631	DUSP11;PTPRC;PTPN12	.
				protein monoubiquitination (GO:0006513)	1/37	0.615076		1	1.06197	DTX3L	.
				regulation of regulated secretory pathway (GO:1903305)	1/37	0.615076		1	1.06197	RAB27A	.
				positive regulation of axonogenesis (GO:0050772)	1/37	0.615076		1	1.06197	GOLGA4	.
				negative regulation of Ras protein signal transduction (GO:0046580)	1/37	0.615076		1	1.06197	STAMBP	.
				actin filament bundle assembly (GO:0051017)	1/37	0.615076		1	1.06197	AIF1	.
				response to steroid hormone (GO:0048545)	1/37	0.615076		1	1.06197	URI1	.
				positive regulation of multi-organism process (GO:0043902)	1/37	0.615076		1	1.06197	CD180	.
				organic cyclic compound biosynthetic process (GO:1901362)	1/37	0.615076		1	1.06197	MOCS2	.
				DNA damage response, signal transduction by p53 class mediator (GO:0030330)	2/82	0.621202		1	0.958359	RPS27L;CNOT10	.
				retrograde transport, endosome to Golgi (GO:0042147)	2/82	0.621202		1	0.958359	VPS54;GCC2	.
				negative regulation of binding (GO:0051100)	2/82	0.621202		1	0.958359	IFIT1;IFIT2	.
				potassium ion import (GO:0010107)	1/38	0.62489		1	1.03402	ATP1B3	.
				positive regulation of neuron death (GO:1901216)	1/38	0.62489		1	1.03402	EIF2S1	.
				regulation of cellular amide metabolic process (GO:0034248)	1/38	0.62489		1	1.03402	EIF4E	.
				DNA damage checkpoint (GO:0000077)	1/38	0.62489		1	1.03402	CEP63	.
				homotypic cell-cell adhesion (GO:0034109)	1/38	0.62489		1	1.03402	PLEK	.
				positive regulation of innate immune response (GO:0045089)	1/38	0.62489		1	1.03402	GBP5	.
				cytoskeleton organization (GO:0007010)	3/126	0.625518		1	0.935541	ZMYM1;PPP2R3C;ZMYM6	.
				establishment of protein localization to membrane (GO:0090150)	2/83	0.627796		1	0.946813	GOLGA4;GOLGA7	.
				positive regulation of protein ubiquitination (GO:0031398)	2/83	0.627796		1	0.946813	ARRDC4;BIRC3	.
				positive regulation of nucleic acid-templated transcription (GO:1903508)	12/502	0.628479		1	0.939268	NPAT;DNAJC2;DTX3L;ATMIN;STAT1;NFE2L3;SMARCAD1;TFAM;YEATS4;UBE2V1;PARP9;MED17	.
				vesicle organization (GO:0016050)	3/127	0.630842		1	0.928175	USP8;STX8;SNX10	.
				positive regulation of protein kinase B signaling (GO:0051897)	3/127	0.630842		1	0.928175	PTPRJ;TXN;PIK3AP1	.
				regulation of translation (GO:0006417)	5/213	0.634137		1	0.922365	RPS27L;CNOT10;EIF4E;POLR2K;NUP37	.
				positive regulation of supramolecular fiber organization (GO:1902905)	2/84	0.634301		1	0.935541	PLEK;RHOH	.
				purine ribonucleoside monophosphate biosynthetic process (GO:0009168)	1/39	0.634455		1	1.00751	ATIC	.
				positive regulation of phagocytosis (GO:0050766)	1/39	0.634455		1	1.00751	RAB27A	.
				positive regulation of peptide hormone secretion (GO:0090277)	1/39	0.634455		1	1.00751	MCU	.
				positive regulation of fat cell differentiation (GO:0045600)	1/39	0.634455		1	1.00751	SYAP1	.
				positive regulation of reactive oxygen species metabolic process (GO:2000379)	1/39	0.634455		1	1.00751	RAB27A	.
				regulation of plasma membrane bounded cell projection assembly (GO:0120032)	1/39	0.634455		1	1.00751	IFT20	.
				positive regulation of sequence-specific DNA binding transcription factor activity (GO:0051091)	5/215	0.642285		1	0.913784	PSMA6;GTF2A2;UBE2V1;TRIM38;TANK	.
				regulation of cell cycle (GO:0051726)	5/215	0.642285		1	0.913784	PTPRC;CCPG1;DYNLT3;MX2;LIN9	.
				embryonic heart tube morphogenesis (GO:0003143)	1/40	0.643776		1	0.982318	BBS4	.
				negative regulation of epidermal growth factor receptor signaling pathway (GO:0042059)	1/40	0.643776		1	0.982318	PTPRJ	.
				regulation of protein dephosphorylation (GO:0035304)	1/40	0.643776		1	0.982318	CNEP1R1	.
				positive regulation of mitotic nuclear division (GO:0045840)	1/40	0.643776		1	0.982318	NSMCE2	.
				response to cAMP (GO:0051591)	1/40	0.643776		1	0.982318	STAT1	.
				sterol biosynthetic process (GO:0016126)	1/40	0.643776		1	0.982318	LBR	.
				negative regulation of cytokine secretion (GO:0050710)	1/40	0.643776		1	0.982318	ANXA1	.
				androgen receptor signaling pathway (GO:0030521)	1/40	0.643776		1	0.982318	MED17	.
				response to peptide hormone (GO:0043434)	1/40	0.643776		1	0.982318	STAT1	.
				phosphatidic acid biosynthetic process (GO:0006654)	1/40	0.643776		1	0.982318	PLA2G4A	.
				negative regulation of cytokine-mediated signaling pathway (GO:0001960)	1/40	0.643776		1	0.982318	PTPRC	.
				neuron migration (GO:0001764)	1/40	0.643776		1	0.982318	PEX13	.
				regulation of intracellular transport (GO:0032386)	1/40	0.643776		1	0.982318	MX2	.
				positive regulation of cytokine biosynthetic process (GO:0042108)	1/40	0.643776		1	0.982318	GLMN	.
				regulation of ATPase activity (GO:0043462)	1/40	0.643776		1	0.982318	ATP1B3	.
				determination of heart left/right asymmetry (GO:0061371)	1/40	0.643776		1	0.982318	BBS4	.
				nuclear-transcribed mRNA catabolic process (GO:0000956)	4/174	0.649714		1	0.903281	PARN;CNOT10;LSM5;EIF4E	.
				protein oligomerization (GO:0051259)	5/217	0.650321		1	0.905362	PNPT1;OPA1;SMARCAD1;OLFM4;DNM1L	.
				regulation of phagocytosis (GO:0050764)	1/41	0.65286		1	0.958359	RAB27A	.
				phosphatidic acid metabolic process (GO:0046473)	1/41	0.65286		1	0.958359	PLA2G4A	.
				peptide transport (GO:0015833)	1/41	0.65286		1	0.958359	ARRDC4	.
				regulation of stress-activated MAPK cascade (GO:0032872)	1/41	0.65286		1	0.958359	FAS	.
				regulation of substrate adhesion-dependent cell spreading (GO:1900024)	1/41	0.65286		1	0.958359	OLFM4	.
				cellular response to peptide (GO:1901653)	1/41	0.65286		1	0.958359	CASP4	.
				spliceosomal complex assembly (GO:0000245)	1/41	0.65286		1	0.958359	SRPK1	.
				monocyte chemotaxis (GO:0002548)	1/41	0.65286		1	0.958359	ANXA1	.
				regulation of cellular metabolic process (GO:0031323)	1/41	0.65286		1	0.958359	PDK3	.
				regulation of protein localization (GO:0032880)	1/41	0.65286		1	0.958359	BORA	.
				gluconeogenesis (GO:0006094)	1/41	0.65286		1	0.958359	MDH1	.
				ion transmembrane transport (GO:0034220)	5/219	0.658241		1	0.897094	ATP6V1G1;SGK3;ATP1B3;ATP6V1E1;ATP6V1D	.
				regulation of protein targeting to mitochondrion (GO:1903214)	2/88	0.659432		1	0.893017	UGCG;WDR75	.
				regulation of protein modification process (GO:0031399)	1/42	0.661713		1	0.935541	STAT2	.
				cellular response to radiation (GO:0071478)	1/42	0.661713		1	0.935541	TANK	.
				negative regulation of protein secretion (GO:0050709)	1/42	0.661713		1	0.935541	RSAD2	.
				viral process (GO:0016032)	5/220	0.662157		1	0.893017	SSB;CALCOCO2;CD247;B2M;NUP37	.
				SRP-dependent cotranslational protein targeting to membrane (GO:0006614)	2/89	0.665494		1	0.882983	SRP14;SRP9	.
				protein transmembrane import into intracellular organelle (GO:0044743)	1/43	0.67034		1	0.913784	TIMM23	.
				intrinsic apoptotic signaling pathway by p53 class mediator (GO:0072332)	1/43	0.67034		1	0.913784	RPS27L	.
				response to unfolded protein (GO:0006986)	1/43	0.67034		1	0.913784	HSPA9	.
				positive regulation of interleukin-6 production (GO:0032755)	1/43	0.67034		1	0.913784	IFIH1	.
				substantia nigra development (GO:0021762)	1/43	0.67034		1	0.913784	YWHAE	.
				digestive tract development (GO:0048565)	1/43	0.67034		1	0.913784	STRA6	.
				regulation of multicellular organismal development (GO:2000026)	1/43	0.67034		1	0.913784	CXCL10	.
				regulation of interferon-gamma production (GO:0032649)	1/43	0.67034		1	0.913784	CD274	.
				phagocytosis (GO:0006909)	3/135	0.671538		1	0.873172	ANXA1;AIF1;ARHGAP12	.
				positive regulation of cellular protein metabolic process (GO:0032270)	2/91	0.677358		1	0.863577	CASP8;RPS27L	.
				phospholipase C-activating G-protein coupled receptor signaling pathway (GO:0007200)	2/91	0.677358		1	0.863577	P2RY6;HOMER1	.
				regulation of focal adhesion assembly (GO:0051893)	1/44	0.678748		1	0.893017	PTPRJ	.
				lymphocyte chemotaxis (GO:0048247)	1/44	0.678748		1	0.893017	CXCL10	.
				hexose biosynthetic process (GO:0019319)	1/44	0.678748		1	0.893017	MDH1	.
				regulation of T cell activation (GO:0050863)	1/44	0.678748		1	0.893017	CD47	.
				positive regulation of actin filament bundle assembly (GO:0032233)	1/44	0.678748		1	0.893017	PLEK	.
				protein polymerization (GO:0051258)	1/45	0.686942		1	0.873172	AIF1	.
				positive regulation of blood vessel endothelial cell migration (GO:0043536)	1/45	0.686942		1	0.873172	ANXA1	.
				nicotinamide nucleotide metabolic process (GO:0046496)	1/45	0.686942		1	0.873172	DLD	.
				regulation of synaptic transmission, glutamatergic (GO:0051966)	1/45	0.686942		1	0.873172	ATAD1	.
				cotranslational protein targeting to membrane (GO:0006613)	2/93	0.688877		1	0.845005	SRP14;SRP9	.
				nucleocytoplasmic transport (GO:0006913)	1/46	0.694927		1	0.85419	RSRC1	.
				cellular response to ionizing radiation (GO:0071479)	1/46	0.694927		1	0.85419	TANK	.
				mitotic spindle assembly (GO:0090307)	1/46	0.694927		1	0.85419	BIRC3	.
				icosanoid metabolic process (GO:0006690)	1/46	0.694927		1	0.85419	PLA2G4A	.
				inorganic cation transmembrane transport (GO:0098662)	3/140	0.695252		1	0.841987	SLC30A6;ATP6V1E1;TMCO1	.
				endosomal transport (GO:0016197)	5/229	0.696086		1	0.85792	DTX3L;STX8;VPS54;GCC2;VPS36	.
				positive regulation of protein localization to membrane (GO:1905477)	2/95	0.700055		1	0.827215	YWHAE;CASP8	.
				response to glucose (GO:0009749)	1/47	0.702709		1	0.836016	PDK3	.
				peptide cross-linking (GO:0018149)	1/47	0.702709		1	0.836016	ANXA1	.
				negative regulation of cellular biosynthetic process (GO:0031327)	1/47	0.702709		1	0.836016	PLEK	.
				regulation of organelle assembly (GO:1902115)	1/47	0.702709		1	0.836016	IFT20	.
				postreplication repair (GO:0006301)	1/47	0.702709		1	0.836016	UBE2V1	.
				positive regulation of organelle assembly (GO:1902117)	1/47	0.702709		1	0.836016	BBS4	.
				fatty acid biosynthetic process (GO:0006633)	1/47	0.702709		1	0.836016	DEGS1	.
				heterophilic cell-cell adhesion via plasma membrane cell adhesion molecules (GO:0007157)	1/47	0.702709		1	0.836016	GYPC	.
				apoptotic process (GO:0006915)	5/231	0.703299		1	0.850492	CASP8;CASP4;FAS;DNM1L;IFIT2	.
				positive regulation of macromolecule biosynthetic process (GO:0010557)	3/142	0.704368		1	0.830128	DBF4;RPS27L;NMD3	.
				endosome to lysosome transport (GO:0008333)	1/48	0.710293		1	0.818599	DTX3L	.
				regulation of cell cycle arrest (GO:0071156)	1/48	0.710293		1	0.818599	EVI2B	.
				protein targeting to ER (GO:0045047)	2/97	0.710899		1	0.810159	SRP14;SRP9	.
				antigen processing and presentation of exogenous peptide antigen via MHC class II (GO:0019886)	2/97	0.710899		1	0.810159	DCTN6;CTSS	.
				cellular response to organonitrogen compound (GO:0071417)	2/97	0.710899		1	0.810159	LAMTOR3;LAMTOR5	.
				antigen processing and presentation of exogenous peptide antigen (GO:0002478)	2/97	0.710899		1	0.810159	DCTN6;CTSS	.
				positive regulation of transcription, DNA-templated (GO:0045893)	26/1120	0.715097		1	0.912153	GTF2A2;CCNH;TAF9;YEATS4;WDR43;MED17;NPAT;HSF2;SMARCAD1;UTP15;DTX3L;ATMIN;PCGF5;STAT1;ECD;WDR75;GTF2H1;PARP9;CXCL10;DNAJC2;TFEC;NFE2L3;TFAM;UBE2V1;MNAT1;SSBP2	.
				phosphatidylinositol biosynthetic process (GO:0006661)	2/98	0.716197		1	0.801892	FIG4;PIGH	.
				regulation of insulin secretion (GO:0050796)	2/98	0.716197		1	0.801892	SLC25A5;MCU	.
				antigen processing and presentation of peptide antigen via MHC class II (GO:0002495)	2/98	0.716197		1	0.801892	DCTN6;CTSS	.
				peptidyl-serine phosphorylation (GO:0018105)	3/145	0.71765		1	0.812953	PDK3;VRK1;SGK3	.
				organic hydroxy compound biosynthetic process (GO:1901617)	1/49	0.717684		1	0.801892	LBR	.
				regulation of reactive oxygen species metabolic process (GO:2000377)	1/49	0.717684		1	0.801892	PDK3	.
				positive regulation of response to DNA damage stimulus (GO:2001022)	1/49	0.717684		1	0.801892	NSMCE4A	.
				lipid homeostasis (GO:0055088)	1/49	0.717684		1	0.801892	ORMDL1	.
				regulation of release of sequestered calcium ion into cytosol (GO:0051279)	1/49	0.717684		1	0.801892	CXCL10	.
				vesicle-mediated transport (GO:0016192)	9/410	0.719723		1	0.862523	GOLGA4;DTX3L;STX8;VPS54;RAB27A;RHOH;SNX10;VRK1;GCC2	.
				regulation of cellular protein metabolic process (GO:0032268)	1/50	0.724886		1	0.785855	EIF4E	.
				positive regulation of JUN kinase activity (GO:0043507)	1/50	0.724886		1	0.785855	TANK	.
				negative regulation of protein ubiquitination (GO:0031397)	1/50	0.724886		1	0.785855	DTX3L	.
				fatty acid beta-oxidation (GO:0006635)	1/50	0.724886		1	0.785855	SLC25A17	.
				mRNA-containing ribonucleoprotein complex export from nucleus (GO:0071427)	2/100	0.726548		1	0.785855	EIF4E;NUP37	.
				protein processing (GO:0016485)	2/101	0.731603		1	0.778074	SPPL2A;CTSS	.
				regulation of kinase activity (GO:0043549)	2/101	0.731603		1	0.778074	RAD50;MRE11	.
				response to organonitrogen compound (GO:0010243)	1/51	0.731906		1	0.770446	KYNU	.
				positive regulation of actin filament polymerization (GO:0030838)	1/51	0.731906		1	0.770446	RHOH	.
				regulation of telomere maintenance via telomerase (GO:0032210)	1/51	0.731906		1	0.770446	PARN	.
				regulation of cellular macromolecule biosynthetic process (GO:2000112)	14/631	0.737385		1	0.871788	TRAPPC2;SP110;USP3;RHOH;ZNF527;ZNF569;TFAM;PPIE;ZNF677;UBE2V1;ZMYND11;SSBP2;EIF4E;TCFL5	.
				chemokine-mediated signaling pathway (GO:0070098)	1/52	0.738746		1	0.755629	CXCL10	.
				regulation of calcium ion transport (GO:0051924)	1/52	0.738746		1	0.755629	HOMER1	.
				plasma membrane bounded cell projection morphogenesis (GO:0120039)	1/52	0.738746		1	0.755629	RHOH	.
				positive regulation of cell-substrate adhesion (GO:0010811)	1/52	0.738746		1	0.755629	OLFM4	.
				positive regulation of mitotic cell cycle (GO:0045931)	1/52	0.738746		1	0.755629	EIF4E	.
				regulation of DNA binding (GO:0051101)	1/52	0.738746		1	0.755629	TXN	.
				plasma membrane invagination (GO:0099024)	2/103	0.741474		1	0.762966	AIF1;ARHGAP12	.
				protein import into nucleus (GO:0006606)	2/103	0.741474		1	0.762966	FYB1;GPN3	.
				positive regulation of phosphatidylinositol 3-kinase signaling (GO:0014068)	1/53	0.745412		1	0.741372	PIK3AP1	.
				monocarboxylic acid transport (GO:0015718)	1/53	0.745412		1	0.741372	SLC25A17	.
				embryonic organ development (GO:0048568)	1/53	0.745412		1	0.741372	STRA6	.
				positive regulation of tyrosine phosphorylation of STAT protein (GO:0042531)	1/53	0.745412		1	0.741372	PARP9	.
				peptide metabolic process (GO:0006518)	2/104	0.746293		1	0.755629	SPPL2A;LAMP2	.
				mRNA transport (GO:0051028)	2/104	0.746293		1	0.755629	EIF4E;NUP37	.
				positive regulation of intracellular protein transport (GO:0090316)	3/152	0.746836		1	0.775514	YWHAE;UGCG;WDR75	.
				mRNA export from nucleus (GO:0006406)	2/105	0.751034		1	0.748433	EIF4E;NUP37	.
				sensory perception (GO:0007600)	1/54	0.751909		1	0.727643	BBS4	.
				cellular response to nutrient levels (GO:0031669)	1/54	0.751909		1	0.727643	LAMP2	.
				intracellular transport of virus (GO:0075733)	1/54	0.751909		1	0.727643	NUP37	.
				transport of virus (GO:0046794)	1/54	0.751909		1	0.727643	NUP37	.
				proteolysis (GO:0006508)	6/291	0.753591		1	0.810159	PSMA6;USP25;CASP8;SPPL2A;PGA5;CTSS	.
				fatty acid metabolic process (GO:0006631)	2/106	0.755699		1	0.741372	ACBD5;AASDH	.
				long-chain fatty acid metabolic process (GO:0001676)	1/55	0.75824		1	0.714413	PLA2G4A	.
				regulation of RNA splicing (GO:0043484)	1/55	0.75824		1	0.714413	SRPK1	.
				fat cell differentiation (GO:0045444)	1/55	0.75824		1	0.714413	BBS4	.
				viral life cycle (GO:0019058)	2/107	0.760288		1	0.734444	ITCH;NUP37	.
				ribonucleoprotein complex assembly (GO:0022618)	3/156	0.762404		1	0.755629	PTGES3;RPS27L;SRPK1	.
				ribosome assembly (GO:0042255)	1/56	0.764409		1	0.701656	RPS27L	.
				granulocyte chemotaxis (GO:0071621)	1/56	0.764409		1	0.701656	ANXA1	.
				organonitrogen compound catabolic process (GO:1901565)	1/56	0.764409		1	0.701656	PGA5	.
				positive regulation of protein transport (GO:0051222)	1/56	0.764409		1	0.701656	DNM1L	.
				protein import (GO:0017038)	1/56	0.764409		1	0.701656	LAMP2	.
				cellular iron ion homeostasis (GO:0006879)	1/56	0.764409		1	0.701656	ATP6V1G1	.
				autophagosome organization (GO:1905037)	1/56	0.764409		1	0.701656	GABARAPL1	.
				regulation of cytokine production (GO:0001817)	2/108	0.764803		1	0.727643	IFIH1;ANXA1	.
				negative regulation of hydrolase activity (GO:0051346)	2/108	0.764803		1	0.727643	URI1;IFIT1	.
				regulation of immune response (GO:0050776)	5/251	0.768862		1	0.782724	FCGR3A;SPPL2A;CD247;B2M;BIRC3	.
				positive regulation of cell death (GO:0010942)	1/57	0.770422		1	0.689346	EIF2S1	.
				cellular response to peptide hormone stimulus (GO:0071375)	2/110	0.773611		1	0.714413	SYAP1;PRKACB	.
				regulation of nucleic acid-templated transcription (GO:1903506)	13/607	0.77519		1	0.841525	TRAPPC2;SP110;USP3;RHOH;ZNF527;ZNF569;TFAM;PPIE;ZNF677;UBE2V1;ZMYND11;SSBP2;TCFL5	.
				phospholipid transport (GO:0015914)	1/58	0.776281		1	0.677461	ATP8B4	.
				autophagosome assembly (GO:0000045)	1/58	0.776281		1	0.677461	GABARAPL1	.
				positive regulation of cell morphogenesis involved in differentiation (GO:0010770)	1/58	0.776281		1	0.677461	OLFM4	.
				sterol metabolic process (GO:0016125)	1/59	0.781992		1	0.665978	LBR	.
				keratinocyte differentiation (GO:0030216)	1/59	0.781992		1	0.665978	ANXA1	.
				cell morphogenesis (GO:0000902)	1/59	0.781992		1	0.665978	RHOH	.
				regulation of organelle organization (GO:0033043)	2/113	0.786283		1	0.695447	RHOT1;DNM1L	.
				regulation of mRNA splicing, via spliceosome (GO:0048024)	1/60	0.787556		1	0.654879	SRPK1	.
				nucleosome assembly (GO:0006334)	1/60	0.787556		1	0.654879	HAT1	.
				response to reactive oxygen species (GO:0000302)	1/60	0.787556		1	0.654879	ERCC6L2	.
				muscle organ development (GO:0007517)	1/60	0.787556		1	0.654879	CXCL10	.
				regulation of protein kinase B signaling (GO:0051896)	3/163	0.787773		1	0.723179	PTPRJ;TXN;PIK3AP1	.
				glycerophospholipid biosynthetic process (GO:0046474)	3/164	0.791208		1	0.718769	FIG4;LPCAT2;PLA2G4A	.
				regulation of tyrosine phosphorylation of STAT protein (GO:0042509)	1/61	0.792979		1	0.644143	PARP9	.
				regulation of vesicle fusion (GO:0031338)	1/61	0.792979		1	0.644143	ANXA1	.
				regulation of tumor necrosis factor production (GO:0032680)	1/61	0.792979		1	0.644143	LY96	.
				RNA 3'-end processing (GO:0031123)	1/61	0.792979		1	0.644143	PNPT1	.
				regulation of DNA replication (GO:0006275)	1/61	0.792979		1	0.644143	DBF4	.
				positive regulation of cellular amide metabolic process (GO:0034250)	1/61	0.792979		1	0.644143	RPS27L	.
				peptidyl-lysine modification (GO:0018205)	2/115	0.794381		1	0.683352	IFIH1;NUP37	.
				negative regulation of cell growth (GO:0030308)	2/115	0.794381		1	0.683352	PTPRJ;CDKN2AIP	.
				positive regulation of catabolic process (GO:0009896)	1/62	0.798264		1	0.633754	ITCH	.
				diterpenoid metabolic process (GO:0016101)	1/62	0.798264		1	0.633754	STRA6	.
				stress-activated MAPK cascade (GO:0051403)	1/62	0.798264		1	0.633754	UBE2V1	.
				DNA damage response, signal transduction by p53 class mediator resulting in cell cycle arrest (GO:0006977)	1/62	0.798264		1	0.633754	CNOT10	.
				protein localization to cell periphery (GO:1990778)	2/117	0.802206		1	0.671671	RAB37;ATP1B3	.
				kidney development (GO:0001822)	1/63	0.803414		1	0.623694	STRA6	.
				carbohydrate homeostasis (GO:0033500)	1/63	0.803414		1	0.623694	MCU	.
				negative regulation of dephosphorylation (GO:0035305)	1/63	0.803414		1	0.623694	URI1	.
				signal transduction involved in mitotic G1 DNA damage checkpoint (GO:0072431)	1/63	0.803414		1	0.623694	CNOT10	.
				calcium ion transport (GO:0006816)	2/118	0.806019		1	0.665978	CCR5;TMCO1	.
				central nervous system development (GO:0007417)	4/217	0.80602		1	0.72429	COX7B;SRR;RAB18;PAFAH1B2	.
				positive regulation of protein polymerization (GO:0032273)	1/64	0.808433		1	0.613949	RHOH	.
				homophilic cell adhesion via plasma membrane adhesion molecules (GO:0007156)	1/64	0.808433		1	0.613949	GYPC	.
				positive regulation of JAK-STAT cascade (GO:0046427)	1/64	0.808433		1	0.613949	PARP9	.
				glucose metabolic process (GO:0006006)	1/64	0.808433		1	0.613949	MDH1	.
				peptidyl-serine modification (GO:0018209)	3/170	0.810857		1	0.693401	PDK3;VRK1;SGK3	.
				O-glycan processing (GO:0016266)	1/65	0.813324		1	0.604504	GXYLT1	.
				regulation of myeloid cell differentiation (GO:0045637)	1/65	0.813324		1	0.604504	HSPA9	.
				cellular response to reactive oxygen species (GO:0034614)	1/65	0.813324		1	0.604504	ERCC6L2	.
				negative regulation of cell adhesion (GO:0007162)	1/65	0.813324		1	0.604504	PTPRC	.
				actin filament organization (GO:0007015)	2/120	0.81345		1	0.654879	RHOH;ARHGAP12	.
				positive regulation of hydrolase activity (GO:0051345)	3/172	0.81705		1	0.685338	FNTA;ATP1B3;SSBP1	.
				positive regulation of protein kinase activity (GO:0045860)	3/172	0.81705		1	0.685338	ETAA1;PTPRC;SYAP1	.
				regulation of cell differentiation (GO:0045595)	2/121	0.817069		1	0.649467	OCIAD1;TCFL5	.
				cellular response to light stimulus (GO:0071482)	1/66	0.81809		1	0.595344	EIF2S1	.
				intracellular steroid hormone receptor signaling pathway (GO:0030518)	1/66	0.81809		1	0.595344	MED17	.
				negative regulation of epithelial cell proliferation (GO:0050680)	1/66	0.81809		1	0.595344	STAT1	.
				JNK cascade (GO:0007254)	1/66	0.81809		1	0.595344	UBE2V1	.
				epidermal cell differentiation (GO:0009913)	1/67	0.822735		1	0.586459	ANXA1	.
				negative regulation of protein serine/threonine kinase activity (GO:0071901)	1/67	0.822735		1	0.586459	PTPRJ	.
				positive regulation of autophagy (GO:0010508)	1/67	0.822735		1	0.586459	PAFAH1B2	.
				regulation of cardiac conduction (GO:1903779)	1/67	0.822735		1	0.586459	ATP1B3	.
				regulation of protein localization to plasma membrane (GO:1903076)	1/67	0.822735		1	0.586459	STX8	.
				negative regulation of phosphatase activity (GO:0010923)	1/68	0.827262		1	0.577834	URI1	.
				regulation of actin filament polymerization (GO:0030833)	1/68	0.827262		1	0.577834	RHOH	.
				cholesterol metabolic process (GO:0008203)	1/68	0.827262		1	0.577834	LBR	.
				organic anion transport (GO:0015711)	2/124	0.827552		1	0.633754	SLC25A16;SLC25A17	.
				G-protein coupled receptor signaling pathway, coupled to cyclic nucleotide second messenger (GO:0007187)	2/125	0.830925		1	0.628684	ANXA1;PRKACB	.
				positive regulation of neurogenesis (GO:0050769)	1/69	0.831673		1	0.56946	PLAA	.
				positive regulation of plasma membrane bounded cell projection assembly (GO:0120034)	1/69	0.831673		1	0.56946	BBS4	.
				positive regulation of macromolecule metabolic process (GO:0010604)	5/276	0.834589		1	0.711825	ATAD1;ITCH;DTX3L;FUBP1;RAB27A	.
				positive regulation of proteasomal ubiquitin-dependent protein catabolic process (GO:0032436)	1/70	0.835972		1	0.561325	NUB1	.
				organelle membrane fusion (GO:0090174)	1/71	0.840161		1	0.553419	STX8	.
				response to insulin (GO:0032868)	1/71	0.840161		1	0.553419	SYAP1	.
				regulation of macromolecule metabolic process (GO:0060255)	2/129	0.843828		1	0.60919	NPAT;SRPK1	.
				regulation of phosphatase activity (GO:0010921)	1/72	0.844243		1	0.545732	URI1	.
				negative regulation of cell cycle (GO:0045786)	1/72	0.844243		1	0.545732	BTG3	.
				protein glycosylation (GO:0006486)	2/130	0.846911		1	0.604504	PARP9;PARP8	.
				activation of protein kinase activity (GO:0032147)	4/233	0.847466		1	0.674553	TXN;UBE2V1;PRKACB;TANK	.
				phosphate-containing compound metabolic process (GO:0006796)	3/183	0.848111		1	0.644143	PTPRC;PLAA;PLA2G4A	.
				positive regulation of inflammatory response (GO:0050729)	1/73	0.848221		1	0.538257	GBP5	.
				regulation of peptide hormone secretion (GO:0090276)	1/73	0.848221		1	0.538257	SLC25A5	.
				positive regulation of proteasomal protein catabolic process (GO:1901800)	1/73	0.848221		1	0.538257	NUB1	.
				protein phosphorylation (GO:0006468)	9/470	0.848904		1	0.752414	FYB1;PDK3;RIOK2;GTF2H1;VRK1;SGK3;NEK3;PRKACB;SRPK1	.
				positive regulation of cell proliferation (GO:0008284)	8/424	0.848962		1	0.741372	PTPRC;STAT1;CCPG1;STAMBP;CD47;SLC25A5;AIF1;TNFSF13B	.
				mitotic spindle organization (GO:0007052)	1/74	0.852098		1	0.530983	BIRC3	.
				positive regulation of defense response (GO:0031349)	1/74	0.852098		1	0.530983	GBP5	.
				glucose homeostasis (GO:0042593)	1/74	0.852098		1	0.530983	MCU	.
				mitotic nuclear division (GO:0140014)	1/74	0.852098		1	0.530983	BIRC3	.
				cellular response to organic substance (GO:0071310)	2/133	0.855832		1	0.590868	URI1;PTPN12	.
				Fc-gamma receptor signaling pathway involved in phagocytosis (GO:0038096)	2/133	0.855832		1	0.590868	FCGR3A;CD247	.
				retinoid metabolic process (GO:0001523)	1/75	0.855876		1	0.523903	STRA6	.
				gland development (GO:0048732)	1/75	0.855876		1	0.523903	STRA6	.
				Fc-gamma receptor signaling pathway (GO:0038094)	2/134	0.858698		1	0.586459	FCGR3A;CD247	.
				transforming growth factor beta receptor signaling pathway (GO:0007179)	1/76	0.859558		1	0.51701	FNTA	.
				nucleic acid-templated transcription (GO:0097659)	1/76	0.859558		1	0.51701	POLR2K	.
				positive regulation of JNK cascade (GO:0046330)	1/76	0.859558		1	0.51701	TANK	.
				Fc receptor mediated stimulatory signaling pathway (GO:0002431)	2/135	0.861513		1	0.582115	FCGR3A;CD247	.
				ion transport (GO:0006811)	5/289	0.862239		1	0.679805	ATP6V1G1;SGK3;ATP1B3;ATP6V1E1;ATP6V1D	.
				extracellular matrix disassembly (GO:0022617)	1/78	0.866642		1	0.503753	CTSS	.
				fibroblast growth factor receptor signaling pathway (GO:0008543)	1/78	0.866642		1	0.503753	POLR2K	.
				regulation of cytosolic calcium ion concentration (GO:0051480)	2/137	0.866988		1	0.573617	YWHAE;CCR5	.
				regulation of endothelial cell proliferation (GO:0001936)	1/79	0.870049		1	0.497376	STAT1	.
				response to calcium ion (GO:0051592)	1/79	0.870049		1	0.497376	HOMER1	.
				retrograde vesicle-mediated transport, Golgi to ER (GO:0006890)	1/80	0.87337		1	0.491159	COPB1	.
				negative regulation of MAPK cascade (GO:0043409)	1/80	0.87337		1	0.491159	PTPRJ	.
				negative regulation of defense response (GO:0031348)	1/80	0.87337		1	0.491159	ITCH	.
				negative regulation of sequence-specific DNA binding transcription factor activity (GO:0043433)	2/140	0.87483		1	0.561325	FOXS1;ITCH	.
				epidermis development (GO:0008544)	1/81	0.876605		1	0.485095	UGCG	.
				positive regulation of protein catabolic process (GO:0045732)	1/81	0.876605		1	0.485095	ITCH	.
				negative regulation of NF-kappaB transcription factor activity (GO:0032088)	1/82	0.879758		1	0.47918	ITCH	.
				positive regulation of cell cycle arrest (GO:0071158)	1/82	0.879758		1	0.47918	CNOT10	.
				negative regulation of neuron death (GO:1901215)	1/83	0.882831		1	0.473406	TANK	.
				positive regulation of peptidyl-serine phosphorylation (GO:0033138)	1/83	0.882831		1	0.473406	TXN	.
				protein maturation (GO:0051604)	1/83	0.882831		1	0.473406	CTSS	.
				regulation of mitotic nuclear division (GO:0007088)	1/84	0.885825		1	0.467771	BORA	.
				regulation of peptidyl-serine phosphorylation (GO:0033135)	1/86	0.891587		1	0.456892	TXN	.
				positive regulation of cellular component biogenesis (GO:0044089)	1/87	0.894358		1	0.451641	PLEK	.
				regulation of MAP kinase activity (GO:0043405)	1/87	0.894358		1	0.451641	PTPRJ	.
				heart development (GO:0007507)	2/149	0.895869		1	0.527419	NDUFV2;STRA6	.
				divalent metal ion transport (GO:0070838)	1/88	0.897058		1	0.446508	CCR5	.
				negative regulation of translation (GO:0017148)	1/88	0.897058		1	0.446508	CNOT10	.
				negative regulation of cellular protein metabolic process (GO:0032269)	1/89	0.89969		1	0.441491	CNOT10	.
				positive regulation of response to external stimulus (GO:0032103)	1/90	0.902254		1	0.436586	CD180	.
				regulation of Ras protein signal transduction (GO:0046578)	1/90	0.902254		1	0.436586	STAMBP	.
				regulation of cell proliferation (GO:0042127)	14/740	0.902382		1	0.743376	BTG3;CUL5;CUL2;PTPRJ;IFIT3;TNFSF13B;CXCL10;CCPG1;FAS;SGK3;STAMBP;CD47;SLC25A5;TCFL5	.
				negative regulation of cell proliferation (GO:0008285)	6/363	0.903068		1	0.649467	BTG3;CUL5;CUL2;PTPRJ;AIF1;IFIT3	.
				lipid transport (GO:0006869)	1/91	0.904753		1	0.431788	SLC25A17	.
				regulation of protein catabolic process (GO:0042176)	1/91	0.904753		1	0.431788	ITCH	.
				negative regulation of kinase activity (GO:0033673)	1/91	0.904753		1	0.431788	PTPRC	.
				endocytosis (GO:0006897)	4/263	0.905189		1	0.597608	ANXA1;RHOH;SNX10;VRK1	.
				positive regulation of cellular metabolic process (GO:0031325)	1/92	0.907188		1	0.427095	ATAD1	.
				nuclear export (GO:0051168)	1/92	0.907188		1	0.427095	EIF4E	.
				cellular transition metal ion homeostasis (GO:0046916)	1/93	0.909561		1	0.422502	ATP6V1G1	.
				cellular response to fibroblast growth factor stimulus (GO:0044344)	1/94	0.911873		1	0.418008	POLR2K	.
				vesicle fusion (GO:0006906)	1/94	0.911873		1	0.418008	STX8	.
				skin development (GO:0043588)	1/94	0.911873		1	0.418008	ANXA1	.
				regulation of heart contraction (GO:0008016)	1/95	0.914126		1	0.413608	ATP1B3	.
				positive regulation of protein metabolic process (GO:0051247)	1/96	0.916322		1	0.409299	ITCH	.
				epithelial cell differentiation (GO:0030855)	1/96	0.916322		1	0.409299	TDRD7	.
				regulation of cell death (GO:0010941)	1/96	0.916322		1	0.409299	TXNDC12	.
				cellular metal ion homeostasis (GO:0006875)	1/96	0.916322		1	0.409299	ATP1B3	.
				protein localization to membrane (GO:0072657)	2/160	0.917114		1	0.491159	RAB37;ATP1B3	.
				positive regulation of transcription from RNA polymerase II promoter (GO:0045944)	16/848	0.917469		1	0.741372	GTF2A2;PCGF5;STAT1;CCNH;GTF2B;ECD;TAF9;GTF2H1;YEATS4;MED17;CXCL10;HSF2;TFEC;TFAM;MNAT1;SSBP2	.
				positive regulation of neuron projection development (GO:0010976)	1/97	0.918462		1	0.40508	PLAA	.
				negative regulation of cell motility (GO:2000146)	1/97	0.918462		1	0.40508	PTPRJ	.
				histone modification (GO:0016570)	1/98	0.920547		1	0.400946	USP3	.
				positive regulation of protein modification process (GO:0031401)	2/163	0.92216		1	0.482119	CNEP1R1;FAS	.
				steroid metabolic process (GO:0008202)	1/99	0.922579		1	0.396896	HSD11B1	.
				regulation of gene expression (GO:0010468)	20/1037	0.92338		1	0.757815	TRAPPC2;SP110;USP3;GLMN;RAB27A;RHOH;TDRD7;PARP9;SRPK1;NPAT;FUBP1;ZNF527;ZNF569;TFAM;PPIE;ZNF677;UBE2V1;ZMYND11;SSBP2;TCFL5	.
				cellular response to metal ion (GO:0071248)	1/100	0.924559		1	0.392927	B2M	.
				cellular response to transforming growth factor beta stimulus (GO:0071560)	1/100	0.924559		1	0.392927	FNTA	.
				regulation of protein ubiquitination (GO:0031396)	1/101	0.926489		1	0.389037	BIRC3	.
				phosphorylation (GO:0016310)	6/386	0.930374		1	0.610768	FYB1;VRK1;SGK3;NEK3;PRKACB;SRPK1	.
				B cell receptor signaling pathway (GO:0050853)	1/104	0.931987		1	0.377815	PTPRC	.
				positive regulation of lymphocyte activation (GO:0051251)	1/104	0.931987		1	0.377815	CD47	.
				negative regulation of signal transduction (GO:0009968)	4/283	0.93203		1	0.555374	PTPRC;PLEK;PTPRJ;PTPN12	.
				negative regulation of response to external stimulus (GO:0032102)	1/107	0.937075		1	0.367222	ITCH	.
				regulation of signal transduction (GO:0009966)	3/233	0.938214		1	0.505915	HOMER1;CDKN2AIP;BIRC3	.
				protein autophosphorylation (GO:0046777)	2/175	0.93959		1	0.44906	VRK1;RIOK2	.
				regulation of transcription, DNA-templated (GO:0006355)	32/1598	0.939604		1	0.786838	URI1;YEATS4;LIN9;MED17;NPAT;FOXS1;ZMYM1;ZNF527;ZMYM6;ZNF569;SMARCAD1;POLR2K;TCFL5;TRAPPC2;DTX3L;ATMIN;STAT1;SP110;STAT2;USP3;RHOH;PARP9;DNAJC2;NFE2L3;TFAM;PPIE;ZNF677;UBE2V1;MNAT1;ANKRA2;ZMYND11;SSBP2	.
				circulatory system development (GO:0072359)	1/109	0.940254		1	0.360484	STRA6	.
				regulation of cell motility (GO:2000145)	1/109	0.940254		1	0.360484	SGK3	.
				negative regulation of protein kinase activity (GO:0006469)	1/109	0.940254		1	0.360484	PTPRC	.
				Wnt signaling pathway (GO:0016055)	1/109	0.940254		1	0.360484	VRK1	.
				viral gene expression (GO:0019080)	1/110	0.941782		1	0.357207	NUP37	.
				positive regulation of MAP kinase activity (GO:0043406)	2/177	0.942109		1	0.443986	UBE2V1;TANK	.
				regulation of angiogenesis (GO:0045765)	2/177	0.942109		1	0.443986	STAT1;SARS	.
				viral transcription (GO:0019083)	1/113	0.946139		1	0.347723	NUP37	.
				positive regulation of developmental process (GO:0051094)	1/113	0.946139		1	0.347723	DNM1L	.
				regulation of immune effector process (GO:0002697)	1/114	0.947517		1	0.344673	HERC5	.
				protein O-linked glycosylation (GO:0006493)	1/115	0.94886		1	0.341676	GXYLT1	.
				epithelium development (GO:0060429)	1/115	0.94886		1	0.341676	STAT1	.
				positive regulation of peptidyl-tyrosine phosphorylation (GO:0050731)	1/116	0.950169		1	0.33873	PARP9	.
				activation of MAPK activity (GO:0000187)	1/117	0.951445		1	0.335835	UBE2V1	.
				plasma membrane bounded cell projection organization (GO:0120036)	1/118	0.952688		1	0.332989	PLEK	.
				positive regulation of protein phosphorylation (GO:0001934)	6/412	0.952875		1	0.572224	RAD50;MRE11;PTPRC;CCNH;FAS;TXN	.
				positive regulation of cellular process (GO:0048522)	8/519	0.955585		1	0.605668	NSMCE4A;CCPG1;TAF9;STAMBP;CD47;SLC25A5;CDKN2AIP;TNFSF13B	.
				negative regulation of cell migration (GO:0030336)	1/121	0.956229		1	0.324733	PTPRJ	.
				negative regulation of macromolecule metabolic process (GO:0010605)	1/124	0.959506		1	0.316877	PARP9	.
				protein lipidation (GO:0006497)	1/127	0.962538		1	0.309392	PIGH	.
				regulation of transcription from RNA polymerase II promoter (GO:0006357)	28/1478	0.963313		1	0.744382	URI1;GTF2A2;CCNH;TAF9;YEATS4;LIN9;MED17;FOXS1;ZMYM1;HSF2;ORC2;ZMYM6;TCFL5;PCGF5;STAT1;STAT2;ECD;SARS;GTF2H1;PARP9;CXCL10;TFEC;NFE2L3;TFAM;MNAT1;ANKRA2;ZMYND11;SSBP2	.
				generation of neurons (GO:0048699)	1/130	0.965344		1	0.302252	PEX13	.
				positive regulation of cytosolic calcium ion concentration (GO:0007204)	1/133	0.967939		1	0.295434	CCR5	.
				adenylate cyclase-modulating G-protein coupled receptor signaling pathway (GO:0007188)	1/134	0.968761		1	0.293229	PRKACB	.
				cellular response to organic cyclic compound (GO:0071407)	1/135	0.969561		1	0.291057	URI1	.
				regulation of vesicle-mediated transport (GO:0060627)	1/138	0.971841		1	0.28473	RAB37	.
				cell-cell adhesion via plasma-membrane adhesion molecules (GO:0098742)	1/142	0.974619		1	0.276709	GYPC	.
				transmembrane receptor protein tyrosine kinase signaling pathway (GO:0007169)	5/396	0.974624		1	0.49612	ATP6V1G1;PTPRJ;ATP6V1E1;ATP6V1D;POLR2K	.
				transmembrane receptor protein serine/threonine kinase signaling pathway (GO:0007178)	1/144	0.975903		1	0.272866	FNTA	.
				skeletal system development (GO:0001501)	1/146	0.977122		1	0.269128	TRAPPC2	.
				regulation of protein kinase activity (GO:0045859)	1/147	0.977709		1	0.267297	PTPRC	.
				positive regulation of cell migration (GO:0030335)	2/221	0.97778		1	0.35559	PTPRC;PLAA	.
				negative regulation of cell differentiation (GO:0045596)	1/150	0.97938		1	0.261952	ANKRD26	.
				extracellular matrix organization (GO:0030198)	2/229	0.981399		1	0.343168	CD47;CTSS	.
				negative regulation of cellular process (GO:0048523)	7/534	0.983864		1	0.515073	BTG3;CUL5;CUL2;TXNDC12;PTPRJ;IFIT3;CDKN2AIP	.
				neuron projection morphogenesis (GO:0048812)	1/163	0.98529		1	0.24106	RHOH	.
				neuron projection development (GO:0031175)	1/167	0.986743		1	0.235286	RHOH	.
				regulation of cell migration (GO:0030334)	3/316	0.987952		1	0.373032	ANXA1;PTPRJ;SGK3	.
				negative regulation of protein phosphorylation (GO:0001933)	1/178	0.99004		1	0.220746	PTPRC	.
				regulation of protein phosphorylation (GO:0001932)	2/261	0.99095		1	0.301094	STAT2;FAS	.
				positive regulation of cell differentiation (GO:0045597)	1/194	0.993431		1	0.20254	SYAP1	.
				regulation of MAPK cascade (GO:0043408)	1/203	0.994803		1	0.19356	FAS	.
				negative regulation of transcription from RNA polymerase II promoter (GO:0000122)	6/565	0.996413		1	0.417268	URI1;STAT1;ORC2;SARS;PARP9;TCFL5	.
				anterograde trans-synaptic signaling (GO:0098916)	1/240	0.998018		1	0.16372	HOMER1	.
				sensory perception of smell (GO:0007608)	1/241	0.998069		1	0.16304	BBS4	.
				chemical synaptic transmission (GO:0007268)	1/289	0.999447		1	0.135961	HOMER1	.
				positive regulation of MAPK cascade (GO:0043410)	1/289	0.999447		1	0.135961	FAS	.
				sensory perception of chemical stimulus (GO:0007606)	1/327	0.999794		1	0.120161	BBS4	.
				negative regulation of transcription, DNA-templated (GO:0045892)	7/813	0.999889		1	0.338314	URI1;FOXS1;STAT1;ORC2;SARS;PARP9;TCFL5	.
				nervous system development (GO:0007399)	2/455	0.999904		1	0.172715	COX7B;NDUFV2	.
				negative regulation of gene expression (GO:0010629)	4/618	0.99991		1	0.254322	FOXS1;PNPT1;CNOT10;PARP9	.
				negative regulation of cellular macromolecule biosynthetic process (GO:2000113)	2/512	0.999973		1	0.153487	FOXS1;CNOT10	.
				negative regulation of nucleic acid-templated transcription (GO:1903507)	1/444	0.999987		1	0.0884971	FOXS1	.

## Sheet: brown
Supplementary File S10: The complete list of the functional enrichment analysis of the hub genes in the eight non-preserved modules
GO	Term	Overlap	P-value	Adjusted P-value	Odds Ratio	Genes	KEGG	Term	Overlap	P-value	Adjusted P-value	Odds Ratio	Genes
	actin filament bundle organization (GO:0061572)	12/35	4.65152e-11	1.18684e-07	13.0364	LIMA1;MYO1B;BAIAP2L1;DPYSL3;PLS3;PAWR;ESPN;RHOC;EZR;RND3;RHOD;RHOBTB1	.	Tight junction	28/170	7.77049e-15	2.39331e-12	6.26258	PATJ;F11R;CLDN1;PRKCZ;AMOT;EPB41L4B;PARD6B;CCND1;MARVELD2;CLDN23;ERBB2;MYH10;CGNL1;MAGI1;CGN;CLDN6;TJP1;AFDN;CLDN4;OCLN;CLDN3;DLG3;PARD3;CLDN7;RAB13;AMOTL2;EZR;TJP3
	actin filament bundle assembly (GO:0051017)	12/37	9.84329e-11	1.67434e-07	12.3317	LIMA1;MYO1B;BAIAP2L1;DPYSL3;PLS3;PAWR;ESPN;RHOC;EZR;RND3;RHOD;RHOBTB1	.	Hippo signaling pathway	20/160	8.31059e-09	1.27983e-06	4.75285	YAP1;PATJ;TGFB2;WWC1;TCF7;AXIN2;PRKCZ;AMOT;BMP2;PARD6B;RASSF2;FRMD6;CCND1;DLG3;CDH1;PARD3;TP53BP2;CCN2;YWHAH;TEAD3
	cell-cell junction organization (GO:0045216)	16/72	4.42211e-11	2.2566e-07	8.44951	DSP;TGFB2;CXADR;JUP;CLDN1;TJP1;AFDN;SDK1;PARD6B;OCLN;MARVELD2;CDH1;PERP;F2RL1;DSG2;NECTIN4	.	Adherens junction	13/72	4.26884e-08	4.38267e-06	6.86523	YES1;TCF7;LMO7;PTPRF;TJP1;AFDN;CDH1;PARD3;ERBB2;FYN;NECTIN4;MET;FGFR1
	cell-cell junction assembly (GO:0007043)	16/79	1.95527e-10	2.49443e-07	7.70082	PATJ;JUP;F11R;RHOC;CLDN1;TJP1;PARD6B;OCLN;CLDN3;POF1B;MARVELD2;CDH1;PARD3;RAB13;PKP2;PKP3	.	Cell adhesion molecules (CAMs)	16/145	1.4202e-06	0.000109355	4.19562	F11R;L1CAM;CLDN1;SELE;PTPRF;CLDN6;CLDN4;OCLN;CLDN3;CDH1;CLDN7;CLDN23;SDC1;NEO1;CD22;MPZL1
	apical junction assembly (GO:0043297)	11/35	8.84145e-10	9.02358e-07	11.95	PATJ;PARD6B;OCLN;CLDN3;MARVELD2;POF1B;PARD3;RAB13;F11R;RHOC;CLDN1	.	Axon guidance	17/181	6.20791e-06	0.000382407	3.5712	NTN4;SEMA3F;L1CAM;PRKCZ;RHOD;GNAI1;EFNA1;PARD6B;ABLIM3;CFL2;PARD3;PAK6;PLXNB1;FYN;EPHA1;NEO1;MET
	bicellular tight junction assembly (GO:0070830)	10/28	1.2466e-09	1.06023e-06	13.5796	PATJ;PARD6B;OCLN;CLDN3;MARVELD2;POF1B;PARD3;RAB13;F11R;CLDN1	.	Proteoglycans in cancer	17/201	2.4635e-05	0.0012646	3.21586	TGFB2;CAV1;ITGA2;GAB1;ITPR1;RRAS2;ANK3;HSPG2;DCN;CCND1;ERBB3;ERBB2;PLCE1;SDC1;EZR;MET;FGFR1
	cardiac muscle cell-cardiac muscle cell adhesion (GO:0086042)	6/7	2.2022e-09	1.6054e-06	32.591	DSP;CXADR;JUP;PKP2;DSG2;DSC2	.	Leukocyte transendothelial migration	12/112	3.92449e-05	0.00172678	4.07387	CLDN6;AFDN;CLDN4;OCLN;CLDN3;CLDN7;CLDN23;F11R;EZR;CLDN1;ARHGAP35;GNAI1
	regulation of ventricular cardiac muscle cell action potential (GO:0098911)	7/11	2.51927e-09	1.60698e-06	24.1963	DSP;JUP;CAV1;PKP2;DSG2;DSC2;TRPM4	.	Arrhythmogenic right ventricular cardiomyopathy (ARVC)	9/72	0.000109764	0.00422593	4.75285	DSP;JUP;ITGB4;ITGA3;ITGA2;TCF7;PKP2;DSG2;DSC2
	regulation of cardiac muscle cell action potential (GO:0098901)	9/24	5.17205e-09	2.93255e-06	14.2586	DSP;CXADR;JUP;CAV1;NOS1AP;PKP2;DSG2;DSC2;TRPM4	.	Prostate cancer	10/97	0.000235711	0.00806654	3.91988	ZEB1;CCND1;SPINT1;TCF7;PDGFC;ERBB2;TMPRSS2;PLAT;FGFR1;CREB5
	desmosome organization (GO:0002934)	6/8	8.61272e-09	4.39507e-06	28.5171	DSP;JUP;PERP;PKP2;DSG2;PKP3	.	Focal adhesion	15/199	0.000262356	0.00808057	2.86604	LAMA5;ITGB4;ITGA3;CAV1;ITGA2;PARVA;LAMC2;ARHGAP35;CCND1;COL6A2;PDGFC;ERBB2;PAK6;FYN;MET
	regulation of cell motility (GO:2000145)	16/109	2.61547e-08	1.21334e-05	5.58133	CAVIN1;TACSTD2;ARHGAP18;SPINT2;GATA3;RHOC;RND3;RHOD;RHOBTB1;AMOT;CAMSAP3;PARD6B;ERBB3;ERBB2;AMOTL2;PLXNB1	.	Rap1 signaling pathway	15/206	0.000379882	0.0106367	2.76865	MAGI1;MAGI3;PRKCZ;ADCY6;GNAI1;EFNA1;AFDN;PARD6B;CDH1;PARD3;PDGFC;PLCE1;MET;PFN2;FGFR1
	bundle of His cell-Purkinje myocyte adhesion involved in cell communication (GO:0086073)	5/6	7.24898e-08	3.08263e-05	31.6857	DSP;JUP;PKP2;DSG2;DSC2	.	Pathogenic Escherichia coli infection	7/55	0.000568957	0.0146032	4.83927	OCLN;KRT18;CDH1;FYN;EZR;CLDN1;TUBB4A
	bundle of His cell to Purkinje myocyte communication (GO:0086069)	5/8	6.47554e-07	0.00025419	23.7643	DSP;JUP;PKP2;DSG2;DSC2	.	ECM-receptor interaction	8/82	0.00140566	0.0333033	3.70954	LAMA5;ITGB4;ITGA3;ITGA2;COL6A2;SDC1;LAMC2;HSPG2
	heterotypic cell-cell adhesion (GO:0034113)	7/25	2.66365e-06	0.000906174	10.6464	DSP;CXADR;JUP;PKP2;PARVA;DSG2;DSC2	.	Regulation of actin cytoskeleton	14/214	0.00165511	0.0364124	2.48747	CYFIP2;ITGB4;ITGA3;ITGA2;RRAS2;ARHGAP35;CFL2;PDGFC;PAK6;PIP4K2C;EZR;MYH10;PFN2;FGFR1
	Rho protein signal transduction (GO:0007266)	11/72	2.65897e-06	0.000969194	5.80904	ADGRG1;CDC42EP3;PAK6;EPS8L1;ARHGAP29;RHOU;EPS8L2;RHOC;RND3;RHOD;RHOBTB1	.	Platelet activation	9/124	0.0055221	0.113387	2.75972	P2RY12;GUCY1B1;ITGA2;ITPR1;FYN;PRKCZ;ARHGAP35;ADCY6;GNAI1
	regulation of cell migration (GO:0030334)	24/316	3.69525e-06	0.00110923	2.88781	GRB7;LAMC2;PTPRK;SEMA3F;RHOC;RHOD;RND3;CX3CL1;RHOBTB1;AMOT;CAMSAP3;BMP2;PARD6B;PODXL;DLG5;DPYSL3;PDGFC;NUMB;F2RL1;ZNF304;AMOTL2;PLXNB1;SINHCAF;EPHA1	.	PI3K-Akt signaling pathway	18/354	0.00616358	0.118649	1.93336	MAGI1;LAMA5;IRS1;ITGB4;ITGA3;ITGA2;LAMC2;PPP2R3A;EFNA1;CCND1;ERBB3;COL6A2;PDGFC;ERBB2;MET;FGFR1;YWHAH;CREB5
	regulation of cardiac muscle cell contraction (GO:0086004)	7/26	3.56272e-06	0.00113628	10.2369	DSP;JUP;CAV1;PKP2;DSG2;DSC2;TRPM4	.	Human papillomavirus infection	17/330	0.00675012	0.122296	1.95875	MAGI1;LAMA5;PATJ;ITGB4;ITGA3;ITGA2;TCF7;LAMC2;AXIN2;PPP2R3A;PRKCZ;PARD6B;CCND1;DLG3;PARD3;COL6A2;CREB5
	axonogenesis (GO:0007409)	19/223	7.48085e-06	0.0020092	3.23961	CYFIP2;GRB7;GAB1;ANK3;VLDLR;SEMA3F;L1CAM;S100B;GFRA2;ARHGAP35;EFNA1;PARD6B;PARD3;GRB10;PLXNB1;FYN;EZR;SPTBN1;SPTBN2	.	Pathways in cancer	24/530	0.00727669	0.124512	1.72179	LAMA5;TGFB2;JUP;DAPK1;ITGA3;EPAS1;ITGA2;TCF7;LAMC2;AXIN2;ETS1;CSF2RA;ADCY6;GNAI1;BCR;BMP2;TRAF4;CCND1;CDH1;TRAF5;ERBB2;CCDC6;MET;FGFR1
	regulation of cytoskeleton organization (GO:0051493)	12/95	7.2726e-06	0.00206178	4.80288	CAMSAP3;ARHGAP18;RHOU;GRHL3;PLXNB1;RHOC;RND3;RHOD;PHLDB2;ARHGAP35;ARHGEF5;RHOBTB1	.	Gap junction	7/88	0.00849579	0.137721	3.02454	TJP1;GUCY1B1;PDGFC;ITPR1;TUBB4A;ADCY6;GNAI1
	epidermis development (GO:0008544)	11/81	8.61977e-06	0.00219933	5.16359	DSP;SCEL;ELF3;CRABP2;KRT17;LAMC2;GRHL3;KRT5;GRHL1;EVPL;ZNF750	.	Renal cell carcinoma	6/69	0.00952252	0.146647	3.30633	TGFB2;EPAS1;GAB1;PAK6;ETS1;MET
	establishment of endothelial barrier (GO:0061028)	6/21	1.24655e-05	0.00302911	10.8637	TJP1;AFDN;MARVELD2;F2RL1;F11R;EZR	.	Estrogen signaling pathway	9/137	0.0103651	0.152022	2.49785	GABBR1;KRT19;KRT18;KRT17;ITPR1;KRT23;ADCY6;GNAI1;CREB5
	axon guidance (GO:0007411)	15/158	1.90379e-05	0.00441592	3.60976	CYFIP2;GRB7;GAB1;VLDLR;SEMA3F;L1CAM;GFRA2;ARHGAP35;EFNA1;GRB10;PLXNB1;FYN;EZR;SPTBN1;SPTBN2	.	Small cell lung cancer	7/93	0.0113456	0.158838	2.86193	LAMA5;CCND1;TRAF4;ITGA3;ITGA2;TRAF5;LAMC2
	establishment or maintenance of actin cytoskeleton polarity (GO:0030950)	5/14	2.03028e-05	0.00450457	13.5796	RHOC;RHOD;RND3;RHOBTB1;ARHGAP35	.	Thyroid cancer	4/37	0.0157293	0.210635	4.11057	CCND1;CDH1;TCF7;CCDC6
	cell-matrix adhesion (GO:0007160)	11/90	2.39108e-05	0.00488067	4.64723	DDR1;LAMA5;BCAM;ITGB4;ITGA3;ITGA2;LYPD3;PTPRK;L1CAM;RHOD;FERMT2	.	Gastric cancer	9/149	0.0171809	0.220488	2.29668	TGFB2;CCND1;JUP;CDH1;TCF7;ERBB2;GAB1;AXIN2;MET
	cell-cell adhesion via plasma-membrane adhesion molecules (GO:0098742)	14/142	2.34961e-05	0.00499585	3.74873	TGFB2;CXADR;CLDN1;SELE;CLDN6;SDK1;CLDN4;CDH1;CLDN7;CLDN23;ADGRL1;DSG2;NECTIN4;MPZL2	.	Endometrial cancer	5/58	0.0180311	0.222143	3.27783	CCND1;CDH1;TCF7;ERBB2;AXIN2
	Ras protein signal transduction (GO:0007265)	18/223	2.6854e-05	0.00507541	3.06911	RAB4A;PLK2;ARHGAP29;RAB27B;RHOC;RHOD;RND3;RHOBTB1;ADGRG1;RAB25;CDC42EP3;RAB13;PLCE1;PAK6;EPS8L1;RHOU;ZNF304;EPS8L2	.	Bladder cancer	4/41	0.022226	0.244486	3.70954	CCND1;CDH1;DAPK1;ERBB2
	regulation of actin cytoskeleton organization (GO:0032956)	10/75	2.60027e-05	0.00510353	5.06971	ARHGAP18;RHOU;GRHL3;F11R;RHOC;RND3;RHOD;ARHGAP35;ARHGEF5;RHOBTB1	.	Parathyroid hormone synthesis, secretion and action	7/106	0.0218946	0.24976	2.51094	MMP15;ITPR1;GATA3;ADCY6;GNAI1;FGFR1;CREB5
	regulation of heart rate by cardiac conduction (GO:0086091)	7/35	2.96666e-05	0.00540675	7.60456	DSP;JUP;CAV1;PKP2;DSG2;DSC2;TRPM4	.	Insulin resistance	7/108	0.0239714	0.254593	2.46444	MLXIPL;IRS1;GFPT2;TRIB3;PRKCZ;PTPRF;CREB5
	regulation of actin filament-based process (GO:0032970)	9/62	3.30082e-05	0.0058083	5.51944	ARHGAP18;RHOU;GRHL3;RHOC;RND3;RHOD;ARHGAP35;ARHGEF5;RHOBTB1	.	Hepatitis C	9/155	0.0216087	0.255981	2.20778	CLDN6;CLDN4;OCLN;CLDN3;CCND1;CLDN7;CLDN23;CLDN1;YWHAH
	regulation of phosphatidylinositol 3-kinase signaling (GO:0014066)	10/80	4.59334e-05	0.00781327	4.75285	TGFB2;ERBB3;PDGFC;F2RL1;PLXNB1;PIP4K2C;PTPN13;HCST;DCN;FGFR1	.	Apelin signaling pathway	8/137	0.0285332	0.292941	2.22031	CCND1;CDH1;ITPR1;RRAS2;PLAT;CCN2;ADCY6;GNAI1
	protein localization to cell periphery (GO:1990778)	12/117	6.04833e-05	0.00995634	3.89978	JUP;CDH1;CAV1;RAB13;PKP2;MAP7;ANK3;PKP3;F11R;EZR;FAM126A;SPTBN1	.	Malaria	4/49	0.039531	0.392759	3.1039	TGFB2;SDC1;MET;SELE
	positive regulation of phosphatidylinositol 3-kinase signaling (GO:0014068)	8/53	6.79098e-05	0.0108295	5.73929	TGFB2;ERBB3;PDGFC;F2RL1;PLXNB1;HCST;DCN;FGFR1	.	Melanoma	5/72	0.0410049	0.394672	2.64047	CCND1;CDH1;PDGFC;MET;FGFR1
	cell morphogenesis involved in differentiation (GO:0000904)	8/54	7.79071e-05	0.0116929	5.63301	EFNA1;LAMA5;CLDN3;POF1B;RAB25;PARVA;EPHA1;FERMT2	.	Ras signaling pathway	11/232	0.0437048	0.395915	1.80281	EFNA1;AFDN;PDGFC;GAB1;PLCE1;RRAS2;PAK6;RASAL2;ETS1;MET;FGFR1
	actin filament organization (GO:0007015)	12/120	7.74922e-05	0.0119831	3.80228	MYO1B;BAIAP2L1;POF1B;DPYSL3;PLS3;SHROOM3;RHOU;RHOC;RND3;RHOD;RHOBTB1;CGNL1	.	Circadian entrainment	6/97	0.0428289	0.399736	2.35193	GUCY1B1;NOS1AP;ITPR1;CACNA1H;ADCY6;GNAI1
	protein localization to membrane (GO:0072657)	14/160	8.77167e-05	0.0124338	3.327	JUP;CAV1;ANK3;F11R;FAM126A;DLG3;CDH1;RAB13;PKP2;MAP7;PKP3;EZR;SPTBN1;FERMT2	.	AGE-RAGE signaling pathway in diabetic complications	6/100	0.0484507	0.426366	2.28137	TGFB2;CCND1;PLCE1;PRKCZ;SELE;F3
	epithelial cell morphogenesis (GO:0003382)	4/10	8.75612e-05	0.0127664	15.2091	CLDN3;RAB25;POF1B;MET	.	Cushing syndrome	8/155	0.0526698	0.450619	1.96247	CCND1;TCF7;ITPR1;AXIN2;CACNA1H;ADCY6;GNAI1;CREB5
	hippo signaling (GO:0035329)	6/30	0.000111551	0.015385	7.60456	YAP1;TJP1;WWC1;AMOTL2;AMOT;TEAD3	.	Alanine, aspartate and glutamate metabolism	3/35	0.0636628	0.52995	3.2591	GFPT2;ASNS;RIMKLB
	cytoskeleton organization (GO:0007010)	12/126	0.000124155	0.0166727	3.62122	LAMA5;CECR2;JUP;MAST4;DST;PLCE1;PACSIN3;PAK6;RHOU;ANK3;EZR;SYNE1	.	Viral myocarditis	4/59	0.0694546	0.562948	2.57782	CXADR;CCND1;CAV1;FYN
	regulation of GTPase activity (GO:0043087)	15/188	0.000140802	0.0179628	3.03374	CCL22;DOCK9;F11R;ARHGAP35;CX3CL1;BCR;AFDN;ERBB2;SH3BP4;F2RL1;SNX9;PLXNB1;EPHA1;ARHGEF5;PROM2	.	Phenylalanine metabolism	2/17	0.0723837	0.571645	4.47327	ALDH1A3;TAT
	calcium-independent cell-cell adhesion via plasma membrane cell-adhesion molecules (GO:0016338)	5/20	0.000137957	0.0180511	9.5057	CLDN6;CLDN4;CLDN23;CLDN7;CLDN1	.	Glycine, serine and threonine metabolism	3/40	0.0874532	0.656966	2.85171	CBS;PSAT1;PHGDH
	regulation of cell proliferation (GO:0042127)	37/740	0.000151828	0.018897	1.90114	YAP1;TES;IRS1;CDCA7L;LAMC2;GATA3;PTPRK;ETS1;ADGRG1;RAB25;ERBB3;EPCAM;PDGFC;SH3BP4;FYN;STX3;TRPM4;TFAP2A;TGFB2;YES1;JUP;TNK1;CDC7;AXIN2;PTPN14;ST18;TBX3;MLXIPL;BMP2;DLG3;PRKRA;DLG5;SINHCAF;IRF6;ATF5;EPHA1;FGFR1	.	GABAergic synapse	5/89	0.0854569	0.658018	2.13611	GABRP;SLC38A1;GABBR1;ADCY6;GNAI1
	protein localization to plasma membrane (GO:0072659)	12/130	0.00016718	0.0203124	3.5098	JUP;CDH1;KIF13A;RAB13;PKP2;MAP7;ANK3;PKP3;F11R;EZR;FAM126A;SPTBN1	.	Dilated cardiomyopathy (DCM)	5/91	0.0918815	0.658128	2.08917	TGFB2;ITGB4;ITGA3;ITGA2;ADCY6
	regulation of ruffle assembly (GO:1900027)	5/21	0.000177173	0.0210259	9.05305	CAV1;TACSTD2;EPS8L1;EPS8L2;PFN2	.	Cortisol synthesis and secretion	4/65	0.0916839	0.672348	2.33987	ITPR1;ADCY6;CACNA1H;CREB5
	serine family amino acid biosynthetic process (GO:0009070)	4/12	0.000197912	0.0229533	12.6743	CBS;PSAT1;PHGDH;GGT1	.	Other types of O-glycan biosynthesis	2/22	0.112959	0.740244	3.45662	B4GALT3;ST6GAL1
	plasma membrane organization (GO:0007009)	6/36	0.000320166	0.0363068	6.33714	PACSIN3;SNX9;ANK3;FNBP1L;A4GALT;SPTBN1	.	Cell cycle	6/124	0.109113	0.746816	1.83981	CDKN1C;TGFB2;WEE1;CCND1;CDC7;YWHAH
	carboxylic acid transport (GO:0046942)	7/51	0.000355305	0.0370025	5.21882	SLC38A1;SLC7A8;SLC6A14;SLC16A11;SLC1A4;SLC7A11;SLC7A1	.	Hematopoietic cell lineage	5/97	0.112584	0.753823	1.95994	ITGA3;ITGA2;CD24;CSF2RA;CD22
	establishment of endothelial intestinal barrier (GO:0090557)	3/6	0.00034095	0.0370185	19.0114	TJP1;AFDN;F11R	.	Phosphatidylinositol signaling system	5/99	0.119944	0.753933	1.92034	CDS1;ITPR1;PLCE1;PIP4K2C;SYNJ2
	regulation of small GTPase mediated signal transduction (GO:0051056)	12/140	0.000333793	0.0370293	3.2591	BCR;ARHGEF16;PLCE1;ARHGAP18;ARHGAP29;RHOU;RHOC;RHOD;ARHGAP35;RHOBTB1;CGNL1;ARHGEF5	.	Renin secretion	4/69	0.108157	0.757102	2.20422	GUCY1B1;ITPR1;ADCY6;GNAI1
	regulation of intracellular signal transduction (GO:1902531)	24/422	0.000364876	0.0372393	2.16243	TGFB2;WWC1;ARHGEF16;ARHGAP18;ARHGAP29;AKAP6;PTPN13;RHOC;RHOD;RHOBTB1;GNAI1;ARHGAP35;BCR;BMP2;PPP1R13L;JMY;TP53BP2;PAK6;F2RL1;TAF4B;RHOU;PIP4K2C;CD24;ARHGEF5	.	Transcriptional misregulation in cancer	8/186	0.118507	0.760419	1.63539	ZEB1;SPINT1;JUP;BMP2K;TMPRSS2;PLAT;PROM1;MET
	myelination (GO:0042552)	6/37	0.000373733	0.0373953	6.16586	PLLP;PARD3;ADGRG6;MALL;MAL2;FAM126A	.	Phenylalanine, tyrosine and tryptophan biosynthesis	1/5	0.124774	0.768609	7.60456	TAT
	negative regulation of cell migration (GO:0030336)	11/121	0.000353583	0.0375903	3.45662	NDRG4;ADGRG1;DLG5;DPYSL3;TACSTD2;PTPRK;SINHCAF;EPHA1;PHLDB2;CX3CL1;PFN2	.	Bacterial invasion of epithelial cells	4/74	0.13046	0.787874	2.05529	CDH1;CAV1;GAB1;MET
	extracellular matrix organization (GO:0030198)	16/229	0.000389533	0.0382267	2.65662	DDR1;LAMA5;TGFB2;ITGB4;ITGA3;ITGA2;LOXL4;LAMC2;CTSV;F11R;HSPG2;DCN;SH3PXD2A;MMP15;CDH1;COL6A2	.	Gastric acid secretion	4/75	0.135133	0.800403	2.02788	ITPR1;EZR;ADCY6;GNAI1
	positive regulation of intracellular signal transduction (GO:1902533)	26/479	0.00043049	0.0414489	2.06387	DDR1;IRS1;SLC20A1;WWC1;GATA3;ERBB3;PDGFC;ERBB2;FYN;TGFB2;PLK2;CAV1;GAB1;RHOC;S100B;DCN;BMP2;DLG5;TRAF5;NOS1AP;F2RL1;PLXNB1;EPHA1;HCST;MET;FGFR1	.	Arginine and proline metabolism	3/49	0.137883	0.801284	2.32793	SMOX;CKMT1A;PYCR1
	positive regulation of cellular catabolic process (GO:0031331)	10/106	0.000483946	0.0457329	3.58706	PFKFB2;MLXIPL;IRS1;DAPK1;PLK2;PACSIN3;SH3BP4;SNX9;EZR;DCN	.	Vitamin B6 metabolism	1/6	0.147798	0.842998	6.33714	PSAT1
	regulation of delayed rectifier potassium channel activity (GO:1902259)	4/15	0.000512532	0.0467045	10.1394	RNF207;NOS1AP;AKAP6;ANK3	.	Regulation of lipolysis in adipocytes	3/55	0.175802	0.966911	2.07397	IRS1;ADCY6;GNAI1
	negative regulation of cellular component movement (GO:0051271)	4/15	0.000512532	0.0475537	10.1394	TGFBR3;TACSTD2;GATA3;SPINT2	.	Hypertrophic cardiomyopathy (HCM)	4/85	0.185278	0.967215	1.78931	TGFB2;ITGB4;ITGA3;ITGA2
	negative regulation of signal transduction (GO:0009968)	18/283	0.000536737	0.0480521	2.41841	DDR1;NDRG4;IRS1;TULP3;GATA3;PEAR1;PRKCZ;DCN;DKK3;SULF2;BMP2;ERBB3;ERBB2;GRB10;CHAC1;EPHA1;MET;FGFR1	.	Cholinergic synapse	5/112	0.172835	0.967874	1.69745	ITPR1;FYN;ADCY6;GNAI1;CREB5
	positive regulation of membrane depolarization (GO:1904181)	3/7	0.000585007	0.0489392	16.2955	ANK3;DCN;TRPM4	.	Colorectal cancer	4/86	0.190595	0.978388	1.7685	TGFB2;CCND1;TCF7;AXIN2
	membrane raft distribution (GO:0031580)	3/7	0.000585007	0.0497549	16.2955	PLLP;MALL;MAL2	.	ErbB signaling pathway	4/85	0.185278	0.983891	1.78931	ERBB3;ERBB2;GAB1;PAK6
	smooth muscle cell migration (GO:0014909)	3/7	0.000585007	0.0505982	16.2955	DDR1;PLAT;PARVA	.	Glutathione metabolism	3/56	0.182384	0.985513	2.03694	CHAC1;OPLAH;GGT1
	positive regulation of hydrolase activity (GO:0051345)	13/172	0.000645291	0.0514519	2.87382	CCL22;DOCK9;F11R;RHOC;CX3CL1;BCR;AFDN;BMP2;ERBB2;F2RL1;SNX9;PLXNB1;PFN2	.	beta-Alanine metabolism	2/31	0.195737	0.988312	2.45308	ALDH1A3;SMOX
	membrane raft polarization (GO:0001766)	3/7	0.000585007	0.0514705	16.2955	PLLP;MALL;MAL2	.	AMPK signaling pathway	5/120	0.209124	1	1.58428	PFKFB2;CCND1;IRS1;PPP2R3A;CREB5
	positive regulation of cellular process (GO:0048522)	27/519	0.000644668	0.0522181	1.97807	SLC44A4;IRS1;CDCA7L;AKAP6;LAMC2;ETS1;RAB25;CCND1;EPCAM;CSPP1;PDGFC;ERBB2;STX3;TRPM4;TGFB2;CAV1;CDC7;AXIN2;TBX3;MLXIPL;PARD3;NOS1AP;SINHCAF;FCGR2B;EPHA1;EZR;FGFR1	.	Long-term depression	3/60	0.209323	1	1.90114	GUCY1B1;ITPR1;GNAI1
	phosphatidylinositol-mediated signaling (GO:0048015)	7/56	0.000635725	0.0523243	4.75285	ERBB3;IRS1;ERBB2;GATA3;EZR;NYAP2;FGFR1	.	Salivary secretion	4/90	0.212322	1	1.6899	GUCY1B1;TRPV6;ITPR1;ADCY6
	negative regulation of cell proliferation (GO:0008285)	21/363	0.000670434	0.0526343	2.19967	CDKN1C;TFAP2A;NDRG4;TGFB2;TES;GATA3;PTPRK;AXIN2;ETS1;PTPN14;ST18;TGFBR3;ADGRG1;BMP2;DLG3;PRKRA;DLG5;SH3BP4;PLXNB1;IRF6;ATF5	.	TGF-beta signaling pathway	4/90	0.212322	1	1.6899	TGFB2;BMP2;NEO1;DCN
	regulation of actin polymerization or depolymerization (GO:0008064)	5/28	0.000735155	0.0568409	6.78979	ARHGAP18;EPS8L1;EPS8L2;ARHGAP35;PFN2	.	Morphine addiction	4/91	0.21786	1	1.67133	GABRP;GABBR1;ADCY6;GNAI1
	positive regulation of cell migration (GO:0030335)	15/221	0.000790382	0.0601988	2.58073	GRB7;DOCK5;TGFB2;GAB1;LAMC2;SEMA3F;RHOD;BMP2;RAB25;PODXL;PDGFC;NUMB;F2RL1;ZNF304;EPHA1	.	Basal cell carcinoma	3/63	0.230066	1	1.81061	BMP2;TCF7;AXIN2
	embryo development ending in birth or egg hatching (GO:0009792)	4/17	0.000857078	0.0633865	8.94654	CAMSAP3;SCEL;TGFB2;FGFR1	.	Synthesis and degradation of ketone bodies	1/10	0.234006	1	3.80228	BDH1
	transforming growth factor beta receptor signaling pathway (GO:0007179)	8/76	0.000852726	0.0639921	4.0024	TGFBR3;TGFB2;PARD3;PTPRK;CGN;F11R;PRKCZ;FERMT2	.	Central carbon metabolism in cancer	3/65	0.244099	1	1.7549	ERBB2;MET;FGFR1
	positive regulation of protein localization to membrane (GO:1905477)	9/95	0.000889933	0.0648761	3.60216	ITGA3;ARHGEF16;ERBB2;TP53BP2;FYN;ANK3;STX3;SPTBN1;YWHAH	.	Tyrosine metabolism	2/36	0.244367	1	2.11238	ALDH1A3;TAT
	asymmetric protein localization (GO:0008105)	3/8	0.00091775	0.0659616	14.2586	PARD3;ERBIN;SHROOM3	.	Autophagy	5/128	0.247614	1	1.48527	IRS1;DAPK1;ATG9B;ITPR1;RRAS2
	negative regulation of cell motility (GO:2000146)	9/97	0.00103364	0.0712795	3.52789	DLG5;DPYSL3;TACSTD2;SPINT2;GATA3;PTPRK;SINHCAF;EPHA1;CX3CL1	.	Acute myeloid leukemia	3/66	0.251166	1	1.72831	CCND1;JUP;TCF7
	regulation of protein polymerization (GO:0032271)	5/30	0.00102085	0.0713618	6.33714	CAMSAP3;ARHGAP18;EPS8L1;EPS8L2;PFN2	.	Taurine and hypotaurine metabolism	1/11	0.254161	1	3.45662	GGT1
	phosphatidylinositol 3-kinase signaling (GO:0014065)	5/30	0.00102085	0.072353	6.33714	ERBB3;IRS1;ERBB2;GATA3;NYAP2	.	Ubiquinone and other terpenoid-quinone biosynthesis	1/11	0.254161	1	3.45662	TAT
	focal adhesion assembly (GO:0048041)	4/18	0.00107921	0.0724631	8.44951	LAMA5;PTPRK;RHOD;FERMT2	.	African trypanosomiasis	2/37	0.254172	1	2.05529	F2RL1;SELE
	cell-substrate adherens junction assembly (GO:0007045)	4/18	0.00107921	0.0734292	8.44951	LAMA5;PTPRK;RHOD;FERMT2	.	Aldosterone-regulated sodium reabsorption	2/37	0.254172	1	2.05529	IRS1;SCNN1A
	negative regulation of cell-cell adhesion (GO:0022408)	5/31	0.00119116	0.0789413	6.13271	BMP2;EPCAM;PODXL;CDH1;SPINT2	.	Aldosterone synthesis and secretion	4/98	0.257603	1	1.55195	ITPR1;CACNA1H;ADCY6;CREB5
	regulation of nephron tubule epithelial cell differentiation (GO:0072182)	3/9	0.0013498	0.0829884	12.6743	GATA3;PROM1;CD24	.	Epithelial cell signaling in Helicobacter pylori infection	3/68	0.265387	1	1.67748	TJP1;F11R;MET
	substrate adhesion-dependent cell spreading (GO:0034446)	5/32	0.00138159	0.0839316	5.94106	EFNA1;LAMA5;PARVA;EPHA1;FERMT2	.	FoxO signaling pathway	5/132	0.267507	1	1.44026	TGFB2;CCND1;IRS1;PLK2;FBXO32
	cytoskeletal anchoring at plasma membrane (GO:0007016)	3/9	0.0013498	0.0840004	12.6743	JUP;ANK3;EZR	.	cGMP-PKG signaling pathway	6/166	0.272422	1	1.37432	GUCY1B1;IRS1;ITPR1;ADCY6;GNAI1;CREB5
	mesodermal cell differentiation (GO:0048333)	3/9	0.0013498	0.0850374	12.6743	ITGB4;ITGA3;ITGA2	.	Longevity regulating pathway	4/102	0.280927	1	1.49109	IRS1;CRYAB;ADCY6;CREB5
	actin crosslink formation (GO:0051764)	3/9	0.0013498	0.0861004	12.6743	BAIAP2L1;DPYSL3;PLS3	.	Hepatocellular carcinoma	6/168	0.281425	1	1.35796	TGFB2;CCND1;TCF7;GAB1;AXIN2;MET
	positive regulation of voltage-gated potassium channel activity (GO:1903818)	3/9	0.0013498	0.0871903	12.6743	RNF207;NOS1AP;AKAP6	.	Non-homologous end-joining	1/13	0.292899	1	2.92483	LIG4
	endothelial cell development (GO:0001885)	4/19	0.0013388	0.0875883	8.0048	MARVELD2;F2RL1;EZR;MET	.	p53 signaling pathway	3/72	0.294083	1	1.58428	TP53I3;CCND1;PERP
	transmembrane receptor protein serine/threonine kinase signaling pathway (GO:0007178)	11/144	0.00151079	0.090701	2.90452	TGFBR3;FAM83G;TGFB2;BMP2;PARD3;CGN;PTPRK;F11R;PRKCZ;FSTL1;FERMT2	.	Fluid shear stress and atherosclerosis	5/139	0.30309	1	1.36773	CAV1;SDC1;PLAT;PRKCZ;SELE
	amino acid transport (GO:0006865)	6/48	0.00154605	0.0917384	4.75285	SLC38A1;SLC7A8;SLC6A14;SLC1A4;SLC7A11;SLC7A1	.	Inositol phosphate metabolism	3/74	0.308512	1	1.54147	PLCE1;PIP4K2C;SYNJ2
	regulation of transport (GO:0051049)	4/20	0.00163901	0.0950439	7.60456	RAB25;WWC1;MYO6;TRIB3	.	Thyroid hormone synthesis	3/74	0.308512	1	1.54147	ITPR1;ADCY6;CREB5
	response to progesterone (GO:0032570)	4/20	0.00163901	0.0961364	7.60456	YAP1;TGFB2;CAV1;ACOD1	.	Pancreatic cancer	3/75	0.315736	1	1.52091	TGFB2;CCND1;ERBB2
	positive regulation of MAPK cascade (GO:0043410)	17/289	0.00177098	0.101543	2.23664	DDR1;NDRG4;TGFB2;CCL22;WWC1;PRKCZ;MID1;CX3CL1;BMP2;ERBB3;PDGFC;ERBB2;F2RL1;EPHA1;CD24;MET;FGFR1	.	Vasopressin-regulated water reabsorption	2/44	0.322652	1	1.72831	ADCY6;CREB5
	positive regulation of interleukin-13 production (GO:0032736)	3/10	0.00189076	0.103748	11.4068	IRF4;GATA3;PRKCZ	.	Chronic myeloid leukemia	3/76	0.322963	1	1.5009	BCR;TGFB2;CCND1
	cell-cell junction maintenance (GO:0045217)	3/10	0.00189076	0.104876	11.4068	CAMSAP3;F2RL1;PLEKHA7	.	Human immunodeficiency virus 1 infection	7/212	0.324583	1	1.25547	WEE1;CFL2;TRAF5;ITPR1;PAK6;GNAI1;AP1M2
	muscle cell migration (GO:0014812)	3/10	0.00189076	0.106028	11.4068	DDR1;MEGF10;PLAT	.	cAMP signaling pathway	7/212	0.324583	1	1.25547	AFDN;GABBR1;PLCE1;RRAS2;ADCY6;GNAI1;CREB5
	central nervous system development (GO:0007417)	14/217	0.00188482	0.106869	2.45308	NDRG4;MOG;LIG4;SMARCA1;CELSR1;S100B;HSPG2;DCLK1;ADGRG1;PDGFC;PHGDH;FYN;NES;FGFR1	.	TNF signaling pathway	4/110	0.328392	1	1.38265	TRAF5;SELE;CX3CL1;CREB5
	transmembrane receptor protein tyrosine kinase signaling pathway (GO:0007169)	21/396	0.00197586	0.107264	2.01636	CYFIP2;DDR1;YES1;IRS1;ARHGEF28;TNK1;GAB1;PLAT;GFRA2;SULF2;EFNA1;BAIAP2L1;ERBB3;ESRP2;ESRP1;PDGFC;ERBB2;FYN;EPHA1;MPZL1;FGFR1	.	Glycosphingolipid biosynthesis	2/45	0.332339	1	1.6899	B4GALT3;A4GALT
	negative regulation of phosphatase activity (GO:0010923)	7/68	0.00202843	0.108959	3.91411	CAMSAP3;FARP1;TGFB2;SH2D4A;DLG3;ARFGEF3;SYTL2	.	Synaptic vesicle cycle	3/78	0.337416	1	1.46242	UNC13B;SYT1;STX3
	negative regulation of cellular process (GO:0048523)	26/534	0.00205376	0.10917	1.8513	TES;GATA3;PTPRK;ETS1;ADGRG1;ERBB3;PODXL;TP53BP2;SH3BP4;APBB2;TFAP2A;TGFB2;CAV1;AXIN2;PTPN14;ST18;DCBLD2;TGFBR3;BMP2;DLG3;PRKRA;DLG5;PLXNB1;SINHCAF;IRF6;ATF5	.	Type II diabetes mellitus	2/46	0.341986	1	1.65317	IRS1;PRKCZ
	positive regulation of plasma membrane bounded cell projection assembly (GO:0120034)	7/69	0.00220735	0.11494	3.85739	DPYSL3;CDC42EP3;EPS8L1;F2RL1;EPS8L2;FNBP1L;ARHGAP35	.	Breast cancer	5/147	0.344542	1	1.29329	CCND1;TCF7;ERBB2;AXIN2;FGFR1
	negative regulation of hydrolase activity (GO:0051346)	9/108	0.0021963	0.115544	3.16857	CAMSAP3;FARP1;DLG3;SH2D4A;VCPKMT;SH3BP4;F11R;ARFGEF3;SYTL2	.	Toxoplasmosis	4/113	0.346338	1	1.34594	LAMA5;TGFB2;LAMC2;GNAI1
	glutathione biosynthetic process (GO:0006750)	3/11	0.00254928	0.125086	10.3699	CHAC1;GGT1;OPLAH	.	Phospholipase D signaling pathway	5/148	0.349758	1	1.28455	PDGFC;GAB1;RRAS2;FYN;ADCY6
	hemidesmosome assembly (GO:0031581)	3/11	0.00254928	0.126301	10.3699	ITGB4;LAMC2;KRT5	.	Cysteine and methionine metabolism	2/47	0.351588	1	1.61799	CBS;TAT
	actomyosin structure organization (GO:0031032)	7/71	0.00260151	0.126433	3.74873	EPB41L4B;EPB41L5;KRT19;FRMD6;EPB41L1;F11R;MYH10	.	Glutamatergic synapse	4/114	0.352326	1	1.33413	SLC38A1;ITPR1;ADCY6;GNAI1
	positive regulation of ERK1 and ERK2 cascade (GO:0070374)	13/201	0.00264103	0.127143	2.45919	DDR1;NDRG4;CCL22;PRKCZ;CX3CL1;BMP2;ERBB3;PDGFC;ERBB2;F2RL1;EPHA1;MET;FGFR1	.	Notch signaling pathway	2/48	0.361141	1	1.58428	NUMB;DTX4
	L-serine metabolic process (GO:0006563)	3/11	0.00254928	0.127539	10.3699	CBS;PSAT1;PHGDH	.	Selenocompound metabolism	1/17	0.364452	1	2.23664	MARS
	epithelial cell-cell adhesion (GO:0090136)	3/11	0.00254928	0.128802	10.3699	CAMSAP3;JUP;PLEKHA7	.	Cocaine addiction	2/49	0.370642	1	1.55195	GNAI1;CREB5
	regulation of actin filament depolymerization (GO:0030834)	3/11	0.00254928	0.13009	10.3699	LIMA1;CFL2;F2RL1	.	MAPK signaling pathway	9/295	0.37304	1	1.16002	EFNA1;TGFB2;ERBB3;PDGFC;ERBB2;RRAS2;MET;CACNA1H;FGFR1
	cell-substrate junction assembly (GO:0007044)	3/11	0.00254928	0.131404	10.3699	ITGB4;LAMC2;KRT5	.	Taste transduction	3/83	0.373429	1	1.37432	GABBR1;SCNN1A;ADCY6
	positive regulation of cell motility (GO:2000147)	12/179	0.00283574	0.132759	2.54902	GRB7;BMP2;CAVIN1;PODXL;PDGFC;NUMB;F2RL1;ZNF304;LAMC2;SEMA3F;EPHA1;RHOD	.	Oxytocin signaling pathway	5/153	0.375879	1	1.24258	GUCY1B1;CCND1;ITPR1;ADCY6;GNAI1
	regulation of phosphatase activity (GO:0010921)	7/72	0.0028178	0.133141	3.69666	CAMSAP3;FARP1;BMP2;SH2D4A;DLG3;ARFGEF3;SYTL2	.	N-Glycan biosynthesis	2/50	0.380085	1	1.52091	B4GALT3;ST6GAL1
	regulation of MAPK cascade (GO:0043408)	13/203	0.00287708	0.13347	2.43496	DDR1;TGFB2;WWC1;CAV1;BMP2;ERBB3;ERBB2;PAK6;TRIB3;EPHA1;CD24;MET;FGFR1	.	Human cytomegalovirus infection	7/225	0.380158	1	1.18293	CCND1;TRAF5;ITPR1;CX3CL1;ADCY6;GNAI1;CREB5
	positive regulation of blood circulation (GO:1903524)	4/23	0.00281447	0.134226	6.61266	TGFB2;CAV1;F2RL1;TRPM4	.	Sphingolipid signaling pathway	4/119	0.382244	1	1.27808	FYN;PPP2R3A;PRKCZ;GNAI1
	positive regulation of kinase activity (GO:0033674)	9/113	0.00298878	0.137403	3.02837	DDR1;RASSF2;TRAF4;ERBB3;ERBB2;SNX9;EPHA1;MET;FGFR1	.	Chemokine signaling pathway	6/190	0.383468	1	1.20072	CCL22;PARD3;PRKCZ;CX3CL1;ADCY6;GNAI1
	skin development (GO:0043588)	8/94	0.00334187	0.145757	3.23598	DSP;SCEL;CLDN4;ITGB4;ITGA3;CLDN1;MET;EVPL	.	MicroRNAs in cancer	9/299	0.387993	1	1.1445	TGFB2;ZEB1;CCND1;ERBB3;IRS1;ERBB2;EZR;SLC7A1;MET
	plasma membrane tubulation (GO:0097320)	3/12	0.00333307	0.146626	9.5057	PACSIN3;SNX9;FNBP1L	.	Insulin secretion	3/86	0.394864	1	1.32638	ADCY6;CREB5;TRPM4
	ERBB2 signaling pathway (GO:0038128)	5/39	0.00339752	0.146928	4.87472	GRB7;ERBB3;ERBB2;GAB1;ERBIN	.	Salmonella infection	3/86	0.394864	1	1.32638	TJP1;MYH10;PFN2
	chordate embryonic development (GO:0043009)	6/56	0.00342922	0.147053	4.07387	KIAA1217;BMP2;LIG4;GATA3;SULF2;FGFR1	.	Cellular senescence	5/160	0.412401	1	1.18821	TGFB2;CCND1;ITPR1;RRAS2;ETS1
	nonribosomal peptide biosynthetic process (GO:0019184)	3/12	0.00333307	0.147901	9.5057	CHAC1;OPLAH;GGT1	.	One carbon pool by folate	1/20	0.413332	1	1.90114	ALDH1L2
	positive regulation of protein depolymerization (GO:1901881)	3/12	0.00333307	0.149199	9.5057	CFL2;F2RL1;NES	.	Osteoclast differentiation	4/127	0.429717	1	1.19757	TGFB2;FHL2;FYN;FCGR2B
	Golgi to plasma membrane protein transport (GO:0043001)	4/24	0.00330802	0.149388	6.33714	KRT18;KIF13A;ANK3;SPTBN1	.	Fc gamma R-mediated phagocytosis	3/91	0.430127	1	1.2535	MYO10;CFL2;FCGR2B
	gland development (GO:0048732)	7/75	0.00354995	0.149714	3.5488	TGFBR3;CAV1;LSR;MET;ARHGAP35;TBX3;DKK3	.	Terpenoid backbone biosynthesis	1/22	0.443816	1	1.72831	ICMT
	nitrogen compound transport (GO:0071705)	7/74	0.00329148	0.149968	3.59675	SLC38A1;SLC7A8;TMEM30B;SLC6A14;SLC1A4;SLC7A11;SLC7A1	.	Relaxin signaling pathway	4/130	0.447288	1	1.16993	PRKCZ;ADCY6;GNAI1;CREB5
	positive regulation of phosphorylation (GO:0042327)	13/208	0.00354329	0.150678	2.37643	DDR1;PFKFB2;AXIN2;EFNA1;MLXIPL;BMP2;CCND1;ERBB3;ERBB2;EPHA1;MET;PROM2;FGFR1	.	Dopaminergic synapse	4/131	0.453108	1	1.161	ITPR1;PPP2R3A;GNAI1;CREB5
	integrin-mediated signaling pathway (GO:0007229)	6/58	0.00409101	0.171118	3.93339	LAMA5;DST;ITGA2;ERBIN;ZNF304;FERMT2	.	Histidine metabolism	1/23	0.45846	1	1.65317	ALDH1A3
	glomerular visceral epithelial cell differentiation (GO:0072112)	3/13	0.00424901	0.172085	8.7745	PODXL;PROM1;CD24	.	Mannose type O-glycan biosynthesis	1/23	0.45846	1	1.65317	B4GALT3
	B cell activation involved in immune response (GO:0002312)	3/13	0.00424901	0.173462	8.7745	LIG4;FCGR2B;GAPT	.	Endocytosis	7/244	0.461658	1	1.09082	RAB4A;PARD6B;PARD3;CAV1;CHMP4C;CBLC;PRKCZ
	pathway-restricted SMAD protein phosphorylation (GO:0060389)	3/13	0.00424901	0.17486	8.7745	TGFBR3;TGFB2;BMP2	.	Amoebiasis	3/96	0.464625	1	1.18821	LAMA5;TGFB2;LAMC2
	positive regulation of cell proliferation (GO:0008284)	21/424	0.00438363	0.176139	1.88321	TGFB2;IRS1;CDCA7L;LIG4;CDC7;LAMC2;TBX3;TGFBR3;MLXIPL;BMP2;RAB25;EPCAM;PDGFC;ERBB2;ZNF304;SINHCAF;STX3;EPHA1;NES;TRPM4;FGFR1	.	Pancreatic secretion	3/98	0.478168	1	1.16396	ITPR1;RAB27B;ADCY6
	positive regulation of sodium ion transport (GO:0010765)	3/13	0.00424901	0.176282	8.7745	PKP2;ANK3;PRSS8	.	Inflammatory mediator regulation of TRP channels	3/100	0.491549	1	1.14068	ITPR1;F2RL1;ADCY6
	cation transmembrane transport (GO:0098655)	4/26	0.00446525	0.176637	5.84966	SLC7A1;CACNA1H;TRPM4;SLC9B2	.	Melanogenesis	3/101	0.498176	1	1.12939	TCF7;ADCY6;GNAI1
	response to ketone (GO:1901654)	4/26	0.00446525	0.178017	5.84966	YAP1;TGFBR3;TGFB2;CAV1	.	Inflammatory bowel disease (IBD)	2/65	0.512972	1	1.16993	TGFB2;GATA3
	cellular response to cytokine stimulus (GO:0071345)	22/456	0.00488073	0.188685	1.83443	LAMA5;CCL22;DAPK1;TCF7;ERBIN;ACOD1;AKAP6;GATA3;PTPN13;PTPN14;CSF2RA;CX3CL1;DCN;ZEB1;CCND1;IRF4;DPYSL3;SDC1;FYN;RHOU;STX3;PTPN4	.	Mitophagy	2/65	0.512972	1	1.16993	ATG9B;RRAS2
	cellular response to transforming growth factor beta stimulus (GO:0071560)	8/100	0.00487654	0.189962	3.04183	TGFBR3;TGFB2;PARD3;CGN;PTPRK;F11R;PRKCZ;FERMT2	.	Biosynthesis of unsaturated fatty acids	1/27	0.513286	1	1.40825	ELOVL6
	regulation of stress fiber assembly (GO:0051492)	6/60	0.00484274	0.190096	3.80228	TACSTD2;EPHA1;PHLDB2;MET;ARHGEF5;PFN2	.	Fatty acid elongation	1/27	0.513286	1	1.40825	ELOVL6
	positive regulation of GTPase activity (GO:0043547)	12/192	0.00498033	0.191087	2.37643	BCR;AFDN;CCL22;DOCK9;ARHGEF16;ERBB2;F2RL1;SNX9;PLXNB1;F11R;EPHA1;CX3CL1	.	C-type lectin receptor signaling pathway	3/104	0.517791	1	1.09681	CCL22;ITPR1;RRAS2
	positive regulation of stress-activated MAPK cascade (GO:0032874)	7/80	0.00508091	0.193492	3.327	TGFB2;BMP2;RASSF2;TRAF4;F2RL1;FCGR2B;MID1	.	Apoptosis	4/143	0.521126	1	1.06358	CASP6;ITPR1;CTSV;PTPN13
	regulation of kinase activity (GO:0043549)	8/101	0.00517754	0.195711	3.01171	DDR1;CDKN1C;ERBB3;ERBB2;PLCE1;EPHA1;MET;FGFR1	.	Aminoacyl-tRNA biosynthesis	2/66	0.521154	1	1.15221	MARS;GARS
	epiboly involved in wound healing (GO:0090505)	3/14	0.00530316	0.197533	8.14775	DDR1;RHOC;ARHGAP35	.	Non-small cell lung cancer	2/66	0.521154	1	1.15221	CCND1;ERBB2
	intermediate filament organization (GO:0045109)	3/14	0.00530316	0.198985	8.14775	DSP;PKP2;PKP1	.	Butanoate metabolism	1/28	0.526104	1	1.35796	BDH1
	primary neural tube formation (GO:0014020)	4/28	0.00586772	0.212362	5.43183	TGFB2;GRHL3;PRICKLE1;CELSR1	.	Adrenergic signaling in cardiomyocytes	4/145	0.532078	1	1.04891	PPP2R3A;ADCY6;GNAI1;CREB5
	positive regulation of cell communication (GO:0010647)	4/28	0.00586772	0.213878	5.43183	SYT1;GATA3;ANK3;TRPM4	.	Retrograde endocannabinoid signaling	4/148	0.54827	1	1.02764	GABRP;ITPR1;ADCY6;GNAI1
	positive regulation of cell cycle (GO:0045787)	7/82	0.0058152	0.215036	3.24585	FOXA1;MLXIPL;TGFB2;CCND1;ASNS;CCNYL1;TBX3	.	Nicotinate and nicotinamide metabolism	1/30	0.550737	1	1.26743	PNP
	negative regulation of endocytosis (GO:0045806)	4/28	0.00586772	0.215417	5.43183	CAV1;PACSIN3;FCGR2B;PROM2	.	Calcium signaling pathway	5/188	0.552711	1	1.01125	ERBB3;ERBB2;ITPR1;PLCE1;CACNA1H
	regulation of ERK1 and ERK2 cascade (GO:0070372)	14/247	0.00599545	0.215456	2.15514	DDR1;NDRG4;CCL22;PRKCZ;CX3CL1;BMP2;ERBB3;PDGFC;ERBB2;F2RL1;EPHA1;EZR;MET;FGFR1	.	B cell receptor signaling pathway	2/71	0.560659	1	1.07107	FCGR2B;CD22
	negative regulation of dephosphorylation (GO:0035305)	6/63	0.00615404	0.219609	3.62122	CAMSAP3;FARP1;SH2D4A;DLG3;ARFGEF3;SYTL2	.	Fructose and mannose metabolism	1/33	0.585312	1	1.15221	PFKFB2
	metal ion homeostasis (GO:0055065)	5/45	0.0063397	0.224663	4.22476	SLC7A8;TRPV6;CAV1;SCNN1A;ANK3	.	Thyroid hormone signaling pathway	3/116	0.591844	1	0.983349	PFKFB2;CCND1;PLCE1
	positive regulation of interleukin-4 production (GO:0032753)	3/15	0.00650082	0.227217	7.60456	IRF4;GATA3;PRKCZ	.	SNARE interactions in vesicular transport	1/34	0.596236	1	1.11832	STX3
	tube closure (GO:0060606)	4/29	0.00666747	0.22835	5.24453	TGFB2;GRHL3;PRICKLE1;CELSR1	.	Pertussis	2/76	0.597781	1	1.0006	CFL2;GNAI1
	atrioventricular valve morphogenesis (GO:0003181)	3/15	0.00650082	0.228784	7.60456	EFNA1;TGFB2;BMP2	.	Wnt signaling pathway	4/158	0.600025	1	0.962603	CCND1;TCF7;AXIN2;PRICKLE1
	positive regulation of cell adhesion (GO:0045785)	6/64	0.00664355	0.229068	3.56464	EPB41L4B;ADGRG1;TGFB2;ERBB2;STX3;RHOD	.	Prion diseases	1/35	0.606873	1	1.08637	FYN
	positive regulation of protein phosphorylation (GO:0001934)	20/412	0.0066361	0.230367	1.84577	DDR1;TGFB2;WWC1;CAV1;AXIN2;TOM1L1;EFNA1;BMP2;RASSF2;TRAF4;CCND1;ERBB3;PDGFC;ERBB2;SNX9;EPHA1;MET;PROM2;PFN2;FGFR1	.	Complement and coagulation cascades	2/79	0.6189	1	0.962603	PLAT;F3
	regulation of cellular component movement (GO:0051270)	5/46	0.00696241	0.233745	4.13291	TGFBR3;ERBB3;ERBB2;ARHGAP18;ETS1	.	Oocyte meiosis	3/125	0.642327	1	0.912548	ITPR1;ADCY6;YWHAH
	protein phosphorylation (GO:0006468)	22/470	0.00688476	0.23422	1.77979	DDR1;CDK18;TGFB2;MAST4;DAPK1;PLK2;CDC42BPG;TNK1;ACOD1;CDC7;PRKCZ;DCLK1;BCR;TGFBR3;NRBP2;BMP2;ERBB2;BMP2K;FYN;EPHA1;HCST;FGFR1	.	Pyruvate metabolism	1/39	0.646697	1	0.974944	ME1
	positive regulation of protein localization to cell periphery (GO:1904377)	5/46	0.00696241	0.235293	4.13291	ITGA3;ARHGEF16;STX3;GNAI1;SPTBN1	.	Ferroptosis	1/40	0.656007	1	0.95057	SLC7A11
	cardiac epithelial to mesenchymal transition (GO:0060317)	3/16	0.00784658	0.253425	7.12928	TGFBR3;TGFB2;BMP2	.	Nicotine addiction	1/40	0.656007	1	0.95057	GABRP
	rRNA transcription (GO:0009303)	3/16	0.00784658	0.255039	7.12928	CAVIN1;TAF1B;MARS	.	Purine metabolism	3/129	0.663304	1	0.884251	GUCY1B1;PNP;ADCY6
	regulation of water loss via skin (GO:0033561)	3/16	0.00784658	0.256674	7.12928	CLDN4;CLDN1;MET	.	Vascular smooth muscle contraction	3/132	0.678443	1	0.864155	GUCY1B1;ITPR1;ADCY6
	negative regulation of epithelial cell proliferation (GO:0050680)	6/66	0.00770634	0.257029	3.45662	CDKN1C;TGFBR3;TGFB2;CAV1;PTPRK;GATA3	.	Human T-cell leukemia virus 1 infection	5/219	0.686276	1	0.868101	TGFB2;CCND1;ETS1;ADCY6;CREB5
	epithelial cell development (GO:0002064)	3/16	0.00784658	0.25833	7.12928	CLDN3;RAB25;POF1B	.	Protein digestion and absorption	2/90	0.689019	1	0.844951	SLC7A8;COL6A2
	establishment of skin barrier (GO:0061436)	3/16	0.00784658	0.260007	7.12928	CLDN4;CLDN1;MET	.	Basal transcription factors	1/45	0.69901	1	0.844951	TAF4B
	circulatory system development (GO:0072359)	8/109	0.00812406	0.260736	2.79067	TGFB2;BMP2;CXADR;ERBB3;PKP2;PLCE1;GATA3;HSPG2	.	Insulin signaling pathway	3/137	0.702542	1	0.832616	IRS1;PRKCZ;PTPRF
	regulation of apoptotic process (GO:0042981)	33/815	0.00967601	0.265466	1.53957	DDR1;FOXA1;BEX2;FHL2;RASSF2;ERBB3;CASP6;TRIM2;PERP;ERBB2;TP53BP2;PAK6;FYN;UNC13B;TFAP2A;TGFB2;DAPK1;PLK2;ARHGEF16;PAWR;ASNS;TBX3;BMP2;KRT18;TP53I3;NOS1AP;JMY;ATF5;EPHA1;CRYAB;MET;ARHGEF5;FGFR1	.	Ubiquitin mediated proteolysis	3/137	0.702542	1	0.832616	CBLC;MID1;RHOBTB1
	regulation of epithelial cell migration (GO:0010632)	5/48	0.00833367	0.265792	3.96071	DOCK5;TGFB2;RAB25;TACSTD2;PFN2	.	GnRH signaling pathway	2/93	0.706203	1	0.817695	ITPR1;ADCY6
	regulation of interleukin-13 secretion (GO:2000665)	2/6	0.00965341	0.266278	12.6743	GATA3;PRKCZ	.	IL-17 signaling pathway	2/93	0.706203	1	0.817695	TRAF4;TRAF5
	liver development (GO:0001889)	4/31	0.00847619	0.267	4.90617	TGFBR3;CCDC39;LSR;MET	.	Signaling pathways regulating pluripotency of stem cells	3/139	0.711789	1	0.820636	AXIN2;TBX3;FGFR1
	positive regulation of intracellular estrogen receptor signaling pathway (GO:0033148)	2/6	0.00965341	0.267725	12.6743	YAP1;FOXA1	.	Hedgehog signaling pathway	1/47	0.714669	1	0.808996	CCND1
	regulation of protein tyrosine kinase activity (GO:0061097)	4/31	0.00847619	0.268658	4.90617	EFNA1;ERBB3;DLG3;CAV1	.	Amino sugar and nucleotide sugar metabolism	1/48	0.722191	1	0.792142	GFPT2
	epithelial tube formation (GO:0072175)	2/6	0.00965341	0.269188	12.6743	PODXL;GATA3	.	Endocrine and other factor-regulated calcium reabsorption	1/48	0.722191	1	0.792142	ADCY6
	wound healing (GO:0042060)	5/50	0.00988145	0.269653	3.80228	EPB41L4B;TGFB2;ERBB3;ERBB2;DCBLD2	.	Ovarian steroidogenesis	1/49	0.729514	1	0.775976	ADCY6
	regulation of cortisol biosynthetic process (GO:2000064)	2/6	0.00965341	0.270667	12.6743	BMP2;DKK3	.	Vibrio cholerae infection	1/50	0.736646	1	0.760456	TJP1
	ventricular compact myocardium morphogenesis (GO:0003223)	2/6	0.00965341	0.272162	12.6743	DSP;TGFBR3	.	Choline metabolism in cancer	2/99	0.738195	1	0.768138	SLC44A4;PDGFC
	regulation of aldosterone biosynthetic process (GO:0032347)	2/6	0.00965341	0.273674	12.6743	BMP2;DKK3	.	Progesterone-mediated oocyte maturation	2/99	0.738195	1	0.768138	ADCY6;GNAI1
	positive regulation of toll-like receptor 3 signaling pathway (GO:0034141)	2/6	0.00965341	0.275203	12.6743	CAV1;F2RL1	.	Mineral absorption	1/51	0.743589	1	0.745545	TRPV6
	regulation of actin filament polymerization (GO:0030833)	6/68	0.00888642	0.276508	3.35495	BAIAP2L1;CDC42EP3;ARHGAP18;EPS8L1;EPS8L2;PFN2	.	T cell receptor signaling pathway	2/101	0.748179	1	0.752927	PAK6;FYN
	cytoskeleton-dependent cytokinesis (GO:0061640)	6/70	0.0101904	0.276605	3.2591	CECR2;SNX9;ANK3;RHOC;MYH10;SPTBN1	.	Glycosaminoglycan biosynthesis	1/53	0.756933	1	0.717412	B4GALT3
	positive regulation of action potential (GO:0045760)	2/6	0.00965341	0.276749	12.6743	ANK3;TRPM4	.	Chagas disease (American trypanosomiasis)	2/103	0.757835	1	0.738307	TGFB2;GNAI1
	regulation of epithelial to mesenchymal transition (GO:0010717)	6/68	0.00888642	0.278205	3.35495	FOXA1;EFNA1;TGFB2;BMP2;AXIN2;PHLDB2	.	Glucagon signaling pathway	2/103	0.757835	1	0.738307	ITPR1;CREB5
	aortic valve morphogenesis (GO:0003180)	2/6	0.00965341	0.278313	12.6743	EFNA1;GATA3	.	Phagosome	3/152	0.766549	1	0.75045	ITGA2;FCGR2B;TUBB4A
	regulation of interleukin-5 secretion (GO:2000662)	2/6	0.00965341	0.279894	12.6743	GATA3;PRKCZ	.	Th17 cell differentiation	2/107	0.776189	1	0.710707	IRF4;GATA3
	positive regulation of locomotion (GO:0040017)	4/33	0.0105788	0.281166	4.60883	CAVIN1;CHMP4C;F2RL1;STX3	.	Viral carcinogenesis	4/201	0.778104	1	0.756673	CCND1;TRAF5;YWHAH;CREB5
	intermediate filament bundle assembly (GO:0045110)	2/6	0.00965341	0.281493	12.6743	PKP2;PKP1	.	Pyrimidine metabolism	1/57	0.781577	1	0.667067	PNP
	establishment or maintenance of epithelial cell apical/basal polarity (GO:0045197)	4/33	0.0105788	0.282638	4.60883	CAMSAP3;DLG3;PARD3;ERBIN	.	Serotonergic synapse	2/113	0.801437	1	0.67297	ITPR1;GNAI1
	aortic valve development (GO:0003176)	2/6	0.00965341	0.283111	12.6743	EFNA1;GATA3	.	Hepatitis B	3/163	0.806002	1	0.699806	TGFB2;HSPG2;CREB5
	neural tube closure (GO:0001843)	4/33	0.0105788	0.284125	4.60883	TGFB2;GRHL3;PRICKLE1;CELSR1	.	Protein processing in endoplasmic reticulum	3/165	0.81254	1	0.691324	ERO1B;YOD1;CRYAB
	renal filtration cell differentiation (GO:0061318)	2/6	0.00965341	0.284748	12.6743	PROM1;CD24	.	Arachidonic acid metabolism	1/63	0.813945	1	0.603537	GGT1
	positive regulation of cell-cell adhesion (GO:0022409)	4/33	0.0105788	0.285629	4.60883	FOXA1;PODXL;ANK3;CX3CL1	.	Shigellosis	1/65	0.823633	1	0.584966	PFN2
	glomerular epithelial cell differentiation (GO:0072311)	2/6	0.00965341	0.286403	12.6743	PROM1;CD24	.	Neurotrophin signaling pathway	2/119	0.824128	1	0.639039	IRS1;GAB1
	positive regulation of cation transmembrane transport (GO:1904064)	3/17	0.00934433	0.287254	6.70991	NOS1AP;AKAP6;ANK3	.	Influenza A	3/171	0.831043	1	0.667067	IVNS1ABP;TMPRSS4;TMPRSS2
	positive regulation of humoral immune response (GO:0002922)	2/6	0.00965341	0.288078	12.6743	ACOD1;FCGR2B	.	Long-term potentiation	1/67	0.832818	1	0.567505	ITPR1
	negative regulation of stress fiber assembly (GO:0051497)	3/17	0.00934433	0.288995	6.70991	TACSTD2;PHLDB2;MET	.	Retinol metabolism	1/67	0.832818	1	0.567505	RDH11
	epithelium development (GO:0060429)	8/115	0.0110497	0.289163	2.64507	EHF;NDRG4;BMP2;ELF3;CASP6;RIPK4;PPP2R3A;CNN3	.	Amphetamine addiction	1/68	0.83723	1	0.559159	CREB5
	negative regulation of peptidyl-serine phosphorylation (GO:0033137)	3/18	0.0109974	0.289276	6.33714	MLXIPL;RASSF2;CAV1	.	Fc epsilon RI signaling pathway	1/68	0.83723	1	0.559159	FYN
	negative regulation of mRNA catabolic process (GO:1902373)	2/6	0.00965341	0.289773	12.6743	PKP1;PKP3	.	Glycolysis / Gluconeogenesis	1/68	0.83723	1	0.559159	ALDH1A3
	nervous system development (GO:0007399)	21/455	0.00949099	0.290015	1.7549	FARP1;MOG;CRIM1;LIG4;VLDLR;NAV2;L1CAM;CELSR1;S100B;GFRA2;DCLK1;SDK1;DLG3;ERBB3;CDH1;PDGFC;FYN;CHAC1;PCDH1;NES;FGFR1	.	Staphylococcus aureus infection	1/68	0.83723	1	0.559159	FCGR2B
	establishment or maintenance of apical/basal cell polarity (GO:0035088)	3/18	0.0109974	0.290775	6.33714	DLG3;PARD3;ERBIN	.	Lysosome	2/123	0.837934	1	0.618257	CTSV;AP1M2
	embryonic camera-type eye development (GO:0031076)	2/6	0.00965341	0.291487	12.6743	ALDH1A3;NES	.	Adipocytokine signaling pathway	1/69	0.841525	1	0.551055	IRS1
	sphingosine-1-phosphate signaling pathway (GO:0003376)	2/6	0.00965341	0.293222	12.6743	SPNS2;EZR	.	Prolactin signaling pathway	1/70	0.845707	1	0.543183	CCND1
	ventricular cardiac muscle tissue morphogenesis (GO:0055010)	4/34	0.0117456	0.299688	4.47327	DSP;TGFBR3;TGFB2;PKP2	.	NOD-like receptor signaling pathway	3/178	0.85063	1	0.640834	TRAF5;ITPR1;ERBIN
	positive regulation of secretion by cell (GO:1903532)	5/52	0.0116158	0.300891	3.65604	UNC13B;TGFB2;RAB27B;EZR;MYH10	.	Bile secretion	1/72	0.853744	1	0.528095	ADCY6
	response to peptide (GO:1901652)	4/34	0.0117456	0.301194	4.47327	IRS1;ERBIN;FYN;GNAI1	.	Leishmaniasis	1/74	0.861363	1	0.513822	TGFB2
	positive regulation of nervous system development (GO:0051962)	5/52	0.0116158	0.302426	3.65604	PARD3;DLG5;NUMB;LIG4;ADGRL1	.	Metabolism of xenobiotics by cytochrome P450	1/74	0.861363	1	0.513822	ALDH1A3
	embryonic limb morphogenesis (GO:0030326)	4/34	0.0117456	0.302715	4.47327	TFAP2A;TGFB2;AFF3;TBX3	.	PPAR signaling pathway	1/74	0.861363	1	0.513822	ME1
	protein homooligomerization (GO:0051260)	11/190	0.0120614	0.306215	2.20132	ALDH1A3;CLDN3;SYT1;CAV1;RASEF;DPYSL3;ANXA6;LY6G6C;CLDN1;CRYAB;TRPM4	.	Natural killer cell mediated cytotoxicity	2/131	0.862642	1	0.580501	FYN;HCST
	epithelial cell differentiation (GO:0030855)	7/96	0.013356	0.31264	2.7725	LAMA5;EHF;ELF3;CASP6;IRF6;GATA3;CNN3	.	Glioma	1/75	0.865023	1	0.506971	CCND1
	cellular protein localization (GO:0034613)	16/327	0.013305	0.312882	1.86044	RAB4A;ATG9B;RAB27B;PTPRK;AXIN2;AMOT;HID1;RAB25;MYO6;KIF13A;RAB13;SNX9;STX3;EZR;FERMT2;YWHAH	.	Measles	2/138	0.881381	1	0.551055	CCND1;FCGR2B
	malate metabolic process (GO:0006108)	2/7	0.0132808	0.313759	10.8637	ME1;CELSR1	.	Huntington disease	3/193	0.886049	1	0.591028	ITPR1;TAF4B;CREB5
	positive regulation of interleukin-5 production (GO:0032754)	2/7	0.0132808	0.315218	10.8637	GATA3;PRKCZ	.	Chemical carcinogenesis	1/82	0.888078	1	0.463693	ALDH1A3
	embryonic organ development (GO:0048568)	5/53	0.012556	0.315631	3.58706	ALDH1A3;NDRG4;TGFB2;NES;TEAD3	.	Cytokine-cytokine receptor interaction	5/294	0.888974	1	0.646646	TGFB2;BMP2;CCL22;CSF2RA;CX3CL1
	negative regulation of supramolecular fiber organization (GO:1902904)	5/54	0.0135463	0.315648	3.52063	CAMSAP3;LIMA1;CRYAB;TUBB4A;PFN2	.	Non-alcoholic fatty liver disease (NAFLD)	2/149	0.906112	1	0.510373	MLXIPL;IRS1
	positive regulation of insulin receptor signaling pathway (GO:0046628)	2/7	0.0132808	0.316691	10.8637	IRS1;PRKCZ	.	mTOR signaling pathway	2/152	0.911969	1	0.5003	IRS1;GRB10
	regulation of calcium ion-dependent exocytosis (GO:0017158)	5/53	0.012556	0.317194	3.58706	SYT1;TRPV6;TC2N;CACNA1H;SYTL2	.	Rheumatoid arthritis	1/91	0.912039	1	0.417833	TGFB2
	regulation of NADP metabolic process (GO:1902031)	2/7	0.0132808	0.318178	10.8637	ME1;CELSR1	.	mRNA surveillance pathway	1/91	0.912039	1	0.417833	PPP2R3A
	regulation of toll-like receptor 3 signaling pathway (GO:0034139)	2/7	0.0132808	0.319678	10.8637	CAV1;F2RL1	.	Th1 and Th2 cell differentiation	1/92	0.914363	1	0.413291	GATA3
	regulation of pinocytosis (GO:0048548)	2/7	0.0132808	0.321194	10.8637	CAV1;PROM2	.	NF-kappa B signaling pathway	1/95	0.920974	1	0.40024	TRAF5
	negative regulation of dendrite morphogenesis (GO:0050774)	2/7	0.0132808	0.322723	10.8637	EFNA1;YWHAH	.	Glycerophospholipid metabolism	1/97	0.925095	1	0.391988	CDS1
	regulation of sodium ion transport (GO:0002028)	4/35	0.0129917	0.323399	4.34546	PKP2;PRSS8;ANK3;YWHAH	.	JAK-STAT signaling pathway	2/162	0.929113	1	0.469417	CCND1;CSF2RA
	response to tumor necrosis factor (GO:0034612)	7/97	0.0140795	0.323639	2.74391	CCL22;ERBIN;ACOD1;GATA3;AFF3;SELE;CX3CL1	.	Necroptosis	2/162	0.929113	1	0.469417	TRAF5;CHMP4C
	positive regulation of epithelial cell differentiation involved in kidney development (GO:2000698)	2/7	0.0132808	0.324267	10.8637	PROM1;CD24	.	HIF-1 signaling pathway	1/100	0.930878	1	0.380228	ERBB2
	positive regulation of peptide secretion (GO:0002793)	4/35	0.0129917	0.324984	4.34546	UNC13B;TGFB2;EZR;MYH10	.	Alzheimer disease	2/171	0.941801	1	0.444711	BACE2;ITPR1
	positive regulation of neuron projection development (GO:0010976)	7/97	0.0140795	0.325103	2.74391	NDRG4;SYT1;DPYSL3;PLXNB1;VLDLR;ARHGAP35;CX3CL1	.	Drug metabolism	1/108	0.944213	1	0.352063	ALDH1A3
	enzyme linked receptor protein signaling pathway (GO:0007167)	8/120	0.0140291	0.325412	2.53485	YES1;ERBB3;TNK1;ERBB2;FYN;GFRA2;PTPRF;MPZL1	.	Thermogenesis	3/231	0.944556	1	0.493803	ADCY6;FGFR1;CREB5
	sulfur amino acid biosynthetic process (GO:0000097)	2/7	0.0132808	0.325826	10.8637	CBS;GGT1	.	Tuberculosis	2/179	0.95124	1	0.424836	TGFB2;FCGR2B
	positive regulation of epithelial cell migration (GO:0010634)	6/74	0.0131961	0.326891	3.08293	DOCK5;EPB41L4B;TGFB2;RAB25;GATA3;ETS1	.	Alcoholism	2/180	0.952312	1	0.422476	GNAI1;CREB5
	regulation of dendritic spine maintenance (GO:1902950)	2/7	0.0132808	0.3274	10.8637	FYN;FCGR2B	.	Kaposi sarcoma-associated herpesvirus infection	2/186	0.958285	1	0.408847	CCND1;ITPR1
	zymogen activation (GO:0031638)	4/36	0.0143191	0.32767	4.22476	CYFIP2;PERP;PLAT;GGT1	.	Epstein-Barr virus infection	2/201	0.970245	1	0.378336	CCND1;TRAF5
	positive regulation of neuron differentiation (GO:0045666)	7/98	0.0148306	0.331933	2.71592	NDRG4;BMP2;ZEB1;DPYSL3;ARHGAP35;CX3CL1;FGFR1	.	Parkinson disease	1/142	0.977586	1	0.267766	GNAI1
	wound healing, spreading of cells (GO:0044319)	3/20	0.0147794	0.332244	5.70342	DDR1;RHOC;ARHGAP35	.	Neuroactive ligand-receptor interaction	4/338	0.979061	1	0.449974	GABRP;GABBR1;PARD3;F2RL1
	negative regulation of actin filament bundle assembly (GO:0032232)	3/20	0.0147794	0.333714	5.70342	TACSTD2;PHLDB2;MET	.	Ribosome	1/153	0.983318	1	0.248515	RPLP0
	mesoderm formation (GO:0001707)	3/20	0.0147794	0.335197	5.70342	ITGB4;ITGA3;ITGA2	.	RNA transport	1/165	0.987915	1	0.230441	CYFIP2
	cell projection assembly (GO:0030031)	3/20	0.0147794	0.336693	5.70342	CYFIP2;PARVA;RHOU	.	Herpes simplex virus 1 infection	5/492	0.996696	1	0.386411	ZNF584;ZFP57;TRAF5;ZNF436;ZNF304
	regulation of regulated secretory pathway (GO:1903305)	4/37	0.0157293	0.347474	4.11057	SYT1;TRPV6;TC2N;SYTL2	.
	positive regulation of cytoskeleton organization (GO:0051495)	6/77	0.0158225	0.348028	2.96282	BAIAP2L1;CFL2;CDC42EP3;F2RL1;NES;PFN2	.
	epithelial to mesenchymal transition (GO:0001837)	4/37	0.0157293	0.348985	4.11057	TGFBR3;TGFB2;BMP2;DLG5	.
	positive regulation of protein transport (GO:0051222)	5/56	0.015682	0.349455	3.39489	UNC13B;TGFB2;EZR;MYH10;ARHGEF5	.
	immunoglobulin mediated immune response (GO:0016064)	2/8	0.0174018	0.355206	9.5057	FCGR2B;GAPT	.
	peripheral nervous system axon ensheathment (GO:0032292)	2/8	0.0174018	0.356632	9.5057	PARD3;ADGRG6	.
	protein dephosphorylation (GO:0006470)	8/125	0.0175551	0.356907	2.43346	PTPN21;PTPRK;DUSP18;PPP2R3A;PTPN13;PTPN4;PTPN14;PTPRF	.
	negative regulation of hippo signaling (GO:0035331)	2/8	0.0174018	0.35807	9.5057	WWC1;DLG5	.
	regulation of toll-like receptor 2 signaling pathway (GO:0034135)	2/8	0.0174018	0.35952	9.5057	F2RL1;ACOD1	.
	peptidyl-tyrosine phosphorylation (GO:0018108)	6/79	0.0177618	0.359676	2.88781	DDR1;YES1;TNK1;FYN;EPHA1;FGFR1	.
	negative regulation of cell differentiation (GO:0045596)	9/150	0.0178683	0.360404	2.28137	FOXA1;EFNA1;CAV1;PKP2;TRIB3;GATA3;AXIN2;SINHCAF;TRPM4	.
	negative regulation of voltage-gated potassium channel activity (GO:1903817)	2/8	0.0174018	0.360981	9.5057	CAV1;ANK3	.
	Schwann cell development (GO:0014044)	2/8	0.0174018	0.362455	9.5057	PARD3;ADGRG6	.
	hepaticobiliary system development (GO:0061008)	3/21	0.0169122	0.362616	5.43183	TGFBR3;LSR;MET	.
	regulation of neurogenesis (GO:0050767)	5/57	0.0168293	0.363899	3.33533	YAP1;CASZ1;NUMB;LIG4;YWHAH	.
	response to forskolin (GO:1904321)	2/8	0.0174018	0.36394	9.5057	GNAI1;ADCY6	.
	ventricular cardiac muscle tissue development (GO:0003229)	3/21	0.0169122	0.364146	5.43183	TGFBR3;PKP2;DSG2	.
	cellular response to forskolin (GO:1904322)	2/8	0.0174018	0.365438	9.5057	GNAI1;ADCY6	.
	regulation of Rho protein signal transduction (GO:0035023)	5/57	0.0168293	0.365448	3.33533	ADGRG1;EPS8L1;F2RL1;EPS8L2;MET	.
	extracellular matrix disassembly (GO:0022617)	6/78	0.0167729	0.365778	2.92483	CDH1;MMP15;LAMC2;CTSV;HSPG2;DCN	.
	positive regulation of neuron death (GO:1901216)	4/38	0.0172237	0.36622	4.0024	TFAP2A;TGFB2;FYN;FCGR2B	.
	heart development (GO:0007507)	9/149	0.0171809	0.366837	2.29668	TGFBR3;NDRG4;TGFB2;BMP2;CXADR;ERBB3;PKP2;PLCE1;GATA3	.
	integrin activation (GO:0033622)	2/8	0.0174018	0.366948	9.5057	FERMT2;CX3CL1	.
	negative regulation of cell communication (GO:0010648)	6/78	0.0167729	0.367347	2.92483	DDR1;ERBB3;ERBB2;EPHA1;MET;FGFR1	.
	defense response to protozoan (GO:0042832)	2/8	0.0174018	0.368471	9.5057	IRF4;LYST	.
	dicarboxylic acid metabolic process (GO:0043648)	5/59	0.0192881	0.371423	3.22227	TAT;ME1;CELSR1;GGT1;ALDH1L2	.
	cell junction assembly (GO:0034329)	5/59	0.0192881	0.37283	3.22227	TJP1;PARD6B;CDH1;FBLIM1;FERMT2	.
	mitotic cytokinesis (GO:0000281)	5/59	0.0192881	0.374248	3.22227	SNX9;ANK3;RHOC;MYH10;SPTBN1	.
	positive regulation of protein targeting to membrane (GO:0090314)	3/22	0.0192077	0.375543	5.18493	ERBB2;FYN;ANK3	.
	renal system development (GO:0072001)	5/59	0.0192881	0.375676	3.22227	TFAP2A;TGFB2;ITGB4;GATA3;SULF2	.
	regulation of hydrolase activity (GO:0051336)	6/80	0.01879	0.376021	2.85171	CAV1;PLXNB1;EPHA1;ARHGAP35;ARHGEF5;PROM2	.
	negative regulation of response to stimulus (GO:0048585)	8/127	0.0191295	0.376904	2.39514	DDR1;TGFB2;ERBB3;ERBB2;EPHA1;FCGR2B;MET;FGFR1	.
	positive regulation of protein autophosphorylation (GO:0031954)	3/22	0.0192077	0.376988	5.18493	TOM1L1;RASSF2;PDGFC	.
	ERBB signaling pathway (GO:0038127)	6/80	0.01879	0.377501	2.85171	GRB7;ERBB3;ERBB2;GAB1;ERBIN;PLCE1	.
	regulation of angiogenesis (GO:0045765)	10/177	0.0189474	0.37769	2.14818	TGFB2;JUP;ERBB2;GAB1;ZNF304;EPHA1;ETS1;HSPG2;DCN;AMOT	.
	positive regulation of protein kinase B signaling (GO:0051897)	8/127	0.0191295	0.378364	2.39514	ERBB3;IRS1;ERBB2;GAB1;FYN;GATA3;MET;FGFR1	.
	vesicle organization (GO:0016050)	8/127	0.0191295	0.379837	2.39514	ALS2CL;SYT1;CAV1;SNX9;STX3;FNBP1L;TC2N;SYTL2	.
	response to peptide hormone (GO:0043434)	4/40	0.0204709	0.392719	3.80228	TGFBR3;IRS1;CAV1;GNAI1	.
	positive regulation of signal transduction (GO:0009967)	11/206	0.0207828	0.397208	2.03034	UNC13B;TGFB2;BMP2;ELF3;IRS1;DLG5;GRB10;BMP2K;GATA3;PRKCZ;SULF2	.
	mesenchymal cell differentiation (GO:0048762)	4/41	0.022226	0.406521	3.70954	TGFBR3;TGFB2;BMP2;DLG5	.
	response to interleukin-4 (GO:0070670)	2/9	0.0219881	0.406541	8.44951	TCF7;GATA3	.
	negative regulation of signaling (GO:0023057)	6/83	0.0221165	0.407439	2.74864	DDR1;ERBB3;ERBB2;EPHA1;MET;FGFR1	.
	odontogenesis (GO:0042476)	4/41	0.022226	0.407984	3.70954	TGFB2;BMP2;TUFT1;AXIN2	.
	regulation of cell-cell adhesion mediated by cadherin (GO:2000047)	2/9	0.0219881	0.408019	8.44951	FOXA1;EPCAM	.
	regulation of microtubule cytoskeleton organization (GO:0070507)	3/23	0.0216667	0.4095	4.9595	CAMSAP3;ATF5;PHLDB2	.
	atrioventricular valve development (GO:0003171)	2/9	0.0219881	0.409508	8.44951	BMP2;TGFB2	.
	embryonic forelimb morphogenesis (GO:0035115)	2/9	0.0219881	0.411008	8.44951	TFAP2A;TBX3	.
	divalent inorganic cation homeostasis (GO:0072507)	3/23	0.0216667	0.411023	4.9595	TRPV6;CAV1;ANK3	.
	cellular response to interleukin-4 (GO:0071353)	2/9	0.0219881	0.41252	8.44951	TCF7;GATA3	.
	glutamine family amino acid metabolic process (GO:0009064)	3/23	0.0216667	0.412556	4.9595	TAT;ACOD1;GGT1	.
	actin cytoskeleton reorganization (GO:0031532)	5/61	0.0219716	0.413731	3.11662	CXADR;CDC42BPG;GAB1;PARVA;EZR	.
	protein modification process (GO:0036211)	6/84	0.0233081	0.423279	2.71592	ERO1B;YES1;ICMT;MMP15;QPCT;PLAT	.
	positive regulation of supramolecular fiber organization (GO:1902905)	6/84	0.0233081	0.42479	2.71592	BAIAP2L1;CFL2;CDC42EP3;F2RL1;MET;PFN2	.
	mammary gland development (GO:0030879)	3/24	0.0242893	0.436439	4.75285	CAV1;TBX3;ARHGAP35	.
	cellular response to organic substance (GO:0071310)	8/133	0.0244543	0.43786	2.28709	MLXIPL;DPYSL3;ERBB2;AKAP6;PTPN13;PTPN4;PTPN14;CACNA1H	.
	intrinsic apoptotic signaling pathway in response to endoplasmic reticulum stress (GO:0070059)	3/24	0.0242893	0.437981	4.75285	ITPR1;TRIB3;CHAC1	.
	cellular modified amino acid biosynthetic process (GO:0042398)	3/24	0.0242893	0.439534	4.75285	CHAC1;OPLAH;GGT1	.
	positive regulation of cell projection organization (GO:0031346)	5/63	0.0248864	0.444039	3.01768	NDRG4;DPYSL3;CX3CL1;ARHGAP35;PROM2	.
	regulation of MAP kinase activity (GO:0043405)	6/87	0.0271391	0.455561	2.62226	ERBB2;PDGFC;CBLC;TRIB3;CD24;FGFR1	.
	peptidyl-tyrosine dephosphorylation (GO:0035335)	3/25	0.0270755	0.455995	4.56274	DUSP18;PTPN13;PTPRF	.
	negative regulation of locomotion (GO:0040013)	3/25	0.0270755	0.457505	4.56274	TACSTD2;SPINT2;GATA3	.
	regulation of cell cycle (GO:0051726)	11/215	0.0273722	0.457968	1.94535	BEX2;AFAP1L2;TGFB2;BMP2;WEE1;CCND1;TP53BP2;PAK6;GATA3;PTPRK;TBX3	.
	negative regulation of epithelial to mesenchymal transition (GO:0010719)	3/25	0.0270755	0.459025	4.56274	FOXA1;EFNA1;TGFB2	.
	digestive tract development (GO:0048565)	4/43	0.0260042	0.459168	3.53701	CCDC39;TGFB2;ITGB4;GATA3	.
	negative regulation of insulin receptor signaling pathway (GO:0046627)	3/25	0.0270755	0.460555	4.56274	IRS1;GRB10;PRKCZ	.
	positive regulation of protein localization to plasma membrane (GO:1903078)	4/43	0.0260042	0.460762	3.53701	ITGA3;ARHGEF16;STX3;SPTBN1	.
	neutral amino acid transport (GO:0015804)	3/25	0.0270755	0.462095	4.56274	SLC38A1;SLC7A8;SLC1A4	.
	cardiac ventricle morphogenesis (GO:0003208)	4/43	0.0260042	0.462367	3.53701	TGFBR3;TGFB2;PKP2;GATA3	.
	forelimb morphogenesis (GO:0035136)	2/10	0.0270125	0.462566	7.60456	TFAP2A;TBX3	.
	cellular response to organic cyclic compound (GO:0071407)	8/135	0.0264391	0.463638	2.2532	P2RY12;JUP;CDH1;CASP6;AKAP6;EZR;ADCY6;GNAI1	.
	protein kinase A signaling (GO:0010737)	2/10	0.0270125	0.464123	7.60456	RAB13;EZR	.
	homophilic cell adhesion via plasma membrane adhesion molecules (GO:0007156)	5/64	0.0264324	0.465119	2.97053	SDK1;CDH1;DSG2;NECTIN4;MPZL2	.
	positive regulation of lipase activity (GO:0060193)	2/10	0.0270125	0.465691	7.60456	RHOC;FGFR1	.
	negative regulation of cell adhesion (GO:0007162)	5/65	0.0280384	0.466058	2.92483	ERBB3;CDH1;PODXL;PLXNB1;SPINT2	.
	positive regulation of intracellular steroid hormone receptor signaling pathway (GO:0033145)	2/10	0.0270125	0.46727	7.60456	YAP1;FOXA1	.
	adherens junction organization (GO:0034332)	4/44	0.0280289	0.467423	3.45662	AFDN;JUP;CDH1;NECTIN4	.
	protein K11-linked deubiquitination (GO:0035871)	2/10	0.0270125	0.468859	7.60456	OTUD7B;YOD1	.
	regulation of coagulation (GO:0050818)	2/10	0.0270125	0.470459	7.60456	CAV1;F2RL1	.
	amino sugar metabolic process (GO:0006040)	2/10	0.0270125	0.47207	7.60456	ST6GAL1;GFPT2	.
	divalent metal ion transport (GO:0070838)	6/88	0.0285032	0.472246	2.59246	TRPV6;NIPAL1;CAV1;ITPR1;FYN;CACNA1H	.
	regulation of protein kinase B signaling (GO:0051896)	9/163	0.0287138	0.474196	2.09942	ERBB3;IRS1;ERBB2;GAB1;TRIB3;FYN;GATA3;MET;FGFR1	.
	regulation of microtubule-based process (GO:0032886)	3/26	0.0300247	0.487949	4.38725	CAMSAP3;ERBB2;PHLDB2	.
	peptidyl-tyrosine autophosphorylation (GO:0038083)	4/45	0.0301449	0.488348	3.37981	DDR1;YES1;TNK1;FYN	.
	negative regulation of cellular response to insulin stimulus (GO:1900077)	3/26	0.0300247	0.489508	4.38725	IRS1;GRB10;PRKCZ	.
	response to gamma radiation (GO:0010332)	3/26	0.0300247	0.491077	4.38725	YAP1;LIG4;CRYAB	.
	regulation of neuron apoptotic process (GO:0043523)	6/89	0.0299117	0.492386	2.56334	TFAP2A;NRBP2;TGFB2;ERBB3;TRIM2;LIG4	.
	cytoskeleton-dependent intracellular transport (GO:0030705)	3/26	0.0300247	0.492656	4.38725	MYO10;KIF13A;KIF1A	.
	regulation of protein localization to plasma membrane (GO:1903076)	5/67	0.0314326	0.507597	2.83752	ITGA3;ARHGEF16;NUMB;STX3;SPTBN1	.
	regulation of symbiosis, encompassing mutualism through parasitism (GO:0043903)	2/11	0.0324487	0.511068	6.91324	CAV1;CHMP4C	.
	retinal metabolic process (GO:0042574)	2/11	0.0324487	0.51265	6.91324	ALDH1A3;RDH11	.
	positive regulation of Wnt signaling pathway (GO:0030177)	8/140	0.031885	0.513277	2.17273	SCEL;BMP2;JUP;CAV1;DIXDC1;AXIN2;TRPM4;SULF2	.
	positive regulation of actin filament depolymerization (GO:0030836)	2/11	0.0324487	0.514242	6.91324	CFL2;F2RL1	.
	renal filtration (GO:0097205)	2/11	0.0324487	0.515844	6.91324	ITGA3;SULF2	.
	regulation of hippo signaling (GO:0035330)	2/11	0.0324487	0.517456	6.91324	WWC1;DLG5	.
	monocarboxylic acid biosynthetic process (GO:0072330)	5/68	0.033222	0.518446	2.7958	ALDH1A3;OSBPL6;OSBPL3;ASNS;DCN	.
	regulation of protein targeting to membrane (GO:0090313)	3/27	0.033136	0.51869	4.22476	ERBB2;FYN;ANK3	.
	negative regulation of morphogenesis of an epithelium (GO:1905331)	2/11	0.0324487	0.519078	6.91324	TACSTD2;PHLDB2	.
	positive regulation of ion transport (GO:0043270)	4/46	0.0323528	0.519171	3.30633	CRACR2A;PKP2;PRSS8;ANK3	.
	negative regulation of small GTPase mediated signal transduction (GO:0051058)	3/27	0.033136	0.520286	4.22476	TGFB2;RASAL2;CGNL1	.
	cellular response to interferon-gamma (GO:0071346)	7/116	0.033627	0.523166	2.29448	CCL22;DAPK1;IRF4;ACOD1;IRF6;MID1;CX3CL1	.
	positive regulation of gene expression (GO:0010628)	29/771	0.0346626	0.536009	1.43017	CDKN1C;YAP1;EHF;CASZ1;FHL2;GATA3;ETS1;EPB41L4B;TAF1B;CDH1;ERBB2;YWHAH;IVNS1ABP;TFAP2A;AFAP1L2;ANK3;SMARCA1;MLXIPL;BMP2;ELF3;IRF4;RNF207;NOS1AP;PKP1;PKP3;IRF6;ATF5;EZR;CREB5	.
	heterophilic cell-cell adhesion via plasma membrane cell adhesion molecules (GO:0007157)	4/47	0.0346529	0.537489	3.23598	CXADR;ADGRL1;NECTIN4;SELE	.
	positive regulation of neurogenesis (GO:0050769)	5/69	0.0350735	0.540726	2.75528	BMP2;ZEB1;NUMB;LIG4;FGFR1	.
	ventricular septum development (GO:0003281)	3/28	0.0364082	0.549678	4.07387	TGFBR3;TGFB2;GATA3	.
	positive regulation of protein tyrosine kinase activity (GO:0061098)	3/28	0.0364082	0.551309	4.07387	EFNA1;ERBB3;DLG3	.
	protein kinase C-activating G-protein coupled receptor signaling pathway (GO:0007205)	2/12	0.0382719	0.551699	6.33714	PARD3;PLCE1	.
	cellular amino acid biosynthetic process (GO:0008652)	3/28	0.0364082	0.552949	4.07387	ASNS;PYCR1;RIMKLB	.
	negative regulation of myoblast differentiation (GO:0045662)	2/12	0.0382719	0.553262	6.33714	PRICKLE1;TBX3	.
	cellular protein modification process (GO:0006464)	36/1001	0.0360014	0.553359	1.36745	ERO1B;EPAS1;PTPN21;PLAT;PTPRK;PRKCZ;PRSS23;FSTL1;EVPL;NRBP2;ERBB2;FYN;DSP;CDK18;TGFB2;ICMT;YES1;DAPK1;PLK2;CDC42BPG;TNK1;LMO7;PPP2R3A;FBXO32;PTPN13;PTPN14;DCLK1;BCR;BMP2;MMP15;QPCT;RAB13;BMP2K;PTPN4;HCST;FGFR1	.
	positive regulation of protein kinase activity (GO:0045860)	9/172	0.0385023	0.553457	1.98957	TOM1L1;EFNA1;TGFB2;RASSF2;DLG3;TRAF4;ERBB3;PAK6;SNX9	.
	cellular response to alcohol (GO:0097306)	3/28	0.0364082	0.5546	4.07387	JUP;CDH1;ADCY6	.
	negative regulation of fibroblast growth factor receptor signaling pathway (GO:0040037)	2/12	0.0382719	0.554833	6.33714	GATA3;SULF2	.
	cellular response to ketone (GO:1901655)	3/28	0.0364082	0.55626	4.07387	ACOD1;GNAI1;ADCY6	.
	positive regulation of stem cell differentiation (GO:2000738)	2/12	0.0382719	0.556414	6.33714	TGFB2;TACSTD2	.
	regulation of Notch signaling pathway (GO:0008593)	5/70	0.0369876	0.556778	2.71592	TGFB2;ELF3;BMP2K;CHAC1;PEAR1	.
	calcium ion transport (GO:0006816)	7/118	0.0363929	0.557697	2.25559	CRACR2A;TRPV6;CAV1;ITPR1;FYN;CACNA1H;TRPM4	.
	negative regulation of epithelial cell differentiation (GO:0030857)	2/12	0.0382719	0.558004	6.33714	ZEB1;CAV1	.
	regulation of pseudopodium assembly (GO:0031272)	2/12	0.0382719	0.559603	6.33714	CDC42EP3;F2RL1	.
	activation of cysteine-type endopeptidase activity (GO:0097202)	2/12	0.0382719	0.561211	6.33714	CYFIP2;PERP	.
	positive regulation of pseudopodium assembly (GO:0031274)	2/12	0.0382719	0.562828	6.33714	CDC42EP3;F2RL1	.
	positive regulation of ruffle assembly (GO:1900029)	2/12	0.0382719	0.564455	6.33714	EPS8L1;EPS8L2	.
	axon development (GO:0061564)	6/94	0.0376358	0.56487	2.42699	PARD6B;PARD3;ANK3;L1CAM;S100B;ARHGAP35	.
	response to prostaglandin E (GO:0034695)	2/12	0.0382719	0.566091	6.33714	TGFBR3;ADCY6	.
	amino acid transmembrane transport (GO:0003333)	3/29	0.0398398	0.566302	3.93339	SLC38A1;SLC7A8;SLC7A11	.
	regulation of transcription from RNA polymerase II promoter (GO:0006357)	50/1478	0.0399642	0.566492	1.28629	FOXA1;EHF;WWC1;FHL2;OTUD7B;VLDLR;ETS1;ARHGAP35;CCND1;TEAD3;ITGA3;RFX2;DCN;TGFBR3;ZEB1;ELF3;IRF4;TRIB3;IRF6;ATF5;EZR;MET;ZNF750;YAP1;EPAS1;TCF7;GATA3;FSTL1;FAM83G;EPCAM;MYO6;ERBB2;CAMTA1;ZNF304;IVNS1ABP;TFAP2A;TGFB2;JUP;CAV1;GRHL3;GRHL1;ST18;TBX3;EFNA1;MLXIPL;BMP2;JMY;F2RL1;TAF4B;RCOR3	.
	organic hydroxy compound biosynthetic process (GO:1901617)	4/49	0.039531	0.566648	3.1039	OSBPL6;PSAT1;OSBPL3;CACNA1H	.
	regulation of cell communication by electrical coupling (GO:0010649)	2/12	0.0382719	0.567737	6.33714	CAV1;ANK3	.
	semaphorin-plexin signaling pathway (GO:0071526)	3/29	0.0398398	0.567884	3.93339	PLXNB1;SEMA3F;MET	.
	entry of bacterium into host cell (GO:0035635)	2/12	0.0382719	0.569392	6.33714	CDH1;MET	.
	cortical cytoskeleton organization (GO:0030865)	3/29	0.0398398	0.569475	3.93339	RAB13;RHOU;EZR	.
	cellular modified amino acid catabolic process (GO:0042219)	2/12	0.0382719	0.571057	6.33714	CHAC1;GGT1	.
	cardiac right ventricle morphogenesis (GO:0003215)	2/12	0.0382719	0.572731	6.33714	TGFB2;GATA3	.
	regulation of protein kinase activity (GO:0045859)	8/147	0.0407274	0.575712	2.06927	DBNDD2;RASSF2;TRAF4;PLCE1;TRIB3;SNX9;EPHA1;DCN	.
	regulation of epithelial cell proliferation (GO:0050678)	5/72	0.0410049	0.578034	2.64047	CDKN1C;TGFBR3;TGFB2;ERBB2;ZNF304	.
	protein autophosphorylation (GO:0046777)	9/175	0.0422153	0.591826	1.95546	DDR1;YES1;DAPK1;TNK1;ERBB2;ACOD1;FYN;EPHA1;FGFR1	.
	regulation of bone mineralization (GO:0030500)	4/50	0.0421092	0.591965	3.04183	TFAP2A;BMP2;BMP2K;TRPM4	.
	cellular response to organonitrogen compound (GO:0071417)	6/97	0.0428289	0.598783	2.35193	P2RY12;JUP;CDH1;SH3BP4;AKAP6;EZR	.
	semaphorin-plexin signaling pathway involved in neuron projection guidance (GO:1902285)	2/13	0.0444579	0.601773	5.84966	PLXNB1;SEMA3F	.
	positive regulation of cell growth (GO:0030307)	6/98	0.0446548	0.60284	2.32793	TGFB2;SLC44A4;SYT1;ERBB2;AKAP6;L1CAM	.
	cranial nerve development (GO:0021545)	2/13	0.0444579	0.603374	5.84966	TFAP2A;ERBB3	.
	regulation of signal transduction (GO:0009966)	11/233	0.044837	0.603703	1.79507	DDR1;ERBB3;ITGA3;ERBB2;PLCE1;TULP3;GATA3;EPHA1;CD24;MET;FGFR1	.
	aminoglycan metabolic process (GO:0006022)	3/30	0.0434291	0.603866	3.80228	SDC1;HSPG2;DCN	.
	motile cilium assembly (GO:0044458)	2/13	0.0444579	0.604983	5.84966	CCDC39;SPATA6	.
	beta-catenin-TCF complex assembly (GO:1904837)	3/30	0.0434291	0.605516	3.80228	BCL9;TCF7;AXIN2	.
	cardiocyte differentiation (GO:0035051)	2/13	0.0444579	0.6066	5.84966	TGFB2;BMP2	.
	catecholamine biosynthetic process (GO:0042423)	2/13	0.0444579	0.608226	5.84966	TGFB2;GATA3	.
	glutamine family amino acid biosynthetic process (GO:0009084)	2/13	0.0444579	0.609862	5.84966	PYCR1;ACOD1	.
	positive regulation of nucleic acid-templated transcription (GO:1903508)	20/502	0.0440277	0.610526	1.51485	CDKN1C;YAP1;IVNS1ABP;TFAP2A;EHF;AFAP1L2;CASZ1;FHL2;GATA3;SMARCA1;ETS1;MLXIPL;BMP2;ELF3;CDH1;IRF4;IRF6;ATF5;YWHAH;CREB5	.
	positive regulation of endothelial cell chemotaxis (GO:2001028)	2/13	0.0444579	0.611505	5.84966	MET;FGFR1	.
	dephosphorylation (GO:0016311)	7/124	0.045576	0.612038	2.14645	PTPN21;PTPRK;DUSP18;PPP2R3A;PTPN13;PTPN4;PTPN14	.
	myelination in peripheral nervous system (GO:0022011)	2/13	0.0444579	0.613158	5.84966	PARD3;ADGRG6	.
	muscle cell development (GO:0055001)	2/13	0.0444579	0.61482	5.84966	MEGF10;SDC1	.
	negative regulation of protein phosphorylation (GO:0001933)	9/178	0.0461622	0.618282	1.9225	MLXIPL;DBNDD2;RASSF2;PARD3;CAV1;TRIB3;EPHA1;PRKCZ;DCN	.
	negative regulation of multicellular organismal process (GO:0051241)	7/125	0.0472383	0.629391	2.12928	FOXA1;EFNA1;BMP2;WWC1;TACSTD2;GATA3;PFN2	.
	regulation of protein autophosphorylation (GO:0031952)	3/31	0.0471741	0.630181	3.67963	TOM1L1;RASSF2;PDGFC	.
	positive regulation of proteolysis (GO:0045862)	4/52	0.0475439	0.631814	2.92483	CYFIP2;PERP;PACSIN3;SNX9	.
	regulation of lipid metabolic process (GO:0019216)	6/100	0.0484507	0.642192	2.28137	IRS1;CAV1;FHL2;ME1;TRIB3;GRHL1	.
	regulation of cell-cell adhesion (GO:0022407)	3/32	0.0510725	0.656481	3.56464	PODXL;CDH1;SPINT2	.
	regulation of potassium ion transmembrane transport (GO:1901379)	3/32	0.0510725	0.658138	3.56464	CAV1;NOS1AP;AKAP6	.
	positive regulation of JNK cascade (GO:0046330)	5/76	0.0498035	0.658413	2.5015	RASSF2;TRAF4;F2RL1;FCGR2B;ARHGEF5	.
	cyclic-nucleotide-mediated signaling (GO:0019935)	3/32	0.0510725	0.659805	3.56464	ADGRG6;AKAP6;ADCY6	.
	regulation of mRNA catabolic process (GO:0061013)	2/14	0.0509837	0.660329	5.43183	PKP1;PKP3	.
	phosphorylation (GO:0016310)	16/386	0.0500882	0.660465	1.57608	CDK18;TGFB2;DAPK1;PLK2;CDC42BPG;TNK1;PRKCZ;DCLK1;BCR;NRBP2;BMP2;ERBB2;BMP2K;FYN;HCST;FGFR1	.
	intrinsic apoptotic signaling pathway (GO:0097193)	6/101	0.050421	0.661435	2.25878	JMY;ITPR1;TP53BP2;TRIB3;CHAC1;CD24	.
	regulation of secretion (GO:0051046)	2/14	0.0509837	0.662009	5.43183	ERBB3;MYO6	.
	neutrophil chemotaxis (GO:0030593)	4/53	0.0504001	0.662865	2.86965	TGFB2;CXADR;CCL22;CX3CL1	.
	positive regulation of cell adhesion mediated by integrin (GO:0033630)	2/14	0.0509837	0.663698	5.43183	TGFB2;PODXL	.
	ncRNA transcription (GO:0098781)	2/14	0.0509837	0.665395	5.43183	CAVIN1;MARS	.
	negative regulation of hydrogen peroxide-induced cell death (GO:1903206)	2/14	0.0509837	0.667102	5.43183	PYCR1;MET	.
	positive regulation of response to stimulus (GO:0048584)	4/54	0.0533484	0.682298	2.8165	TGFB2;GATA3;FCGR2B;TRPM4	.
	action potential (GO:0001508)	4/54	0.0533484	0.684012	2.8165	AKAP6;ANK3;CACNA1H;YWHAH	.
	regulation of cell junction assembly (GO:1901888)	2/15	0.0578272	0.7026	5.06971	TJP1;OCLN	.
	positive regulation of Notch signaling pathway (GO:0045747)	3/33	0.0551218	0.703217	3.45662	TGFB2;ELF3;BMP2K	.
	negative regulation of anoikis (GO:2000811)	2/15	0.0578272	0.704277	5.06971	CAV1;ZNF304	.
	embryonic cranial skeleton morphogenesis (GO:0048701)	2/15	0.0578272	0.705962	5.06971	TFAP2A;IRX5	.
	positive regulation of potassium ion transport (GO:0043268)	2/15	0.0578272	0.707655	5.06971	NOS1AP;AKAP6	.
	positive regulation of cellular response to insulin stimulus (GO:1900078)	2/15	0.0578272	0.709356	5.06971	IRS1;PRKCZ	.
	regulation of canonical Wnt signaling pathway (GO:0060828)	10/213	0.0557535	0.709501	1.78511	SCEL;BMP2;JUP;CAV1;DIXDC1;KREMEN1;PRICKLE1;AXIN2;DKK3;TRPM4	.
	positive regulation of membrane protein ectodomain proteolysis (GO:0051044)	2/15	0.0578272	0.711065	5.06971	PACSIN3;SNX9	.
	positive regulation of cell development (GO:0010720)	3/34	0.0593195	0.712253	3.35495	NUMB;LIG4;AKAP6	.
	mesenchyme morphogenesis (GO:0072132)	2/15	0.0578272	0.712783	5.06971	TGFB2;BMP2	.
	granulocyte chemotaxis (GO:0071621)	4/56	0.0595197	0.712979	2.71592	TGFB2;CXADR;CCL22;CX3CL1	.
	regulation of insulin receptor signaling pathway (GO:0046626)	3/34	0.0593195	0.713933	3.35495	IRS1;GRB10;PRKCZ	.
	regulation of interleukin-4 production (GO:0032673)	2/15	0.0578272	0.714509	5.06971	GATA3;PRKCZ	.
	bone development (GO:0060348)	3/34	0.0593195	0.715621	3.35495	TFAP2A;PLS3;SULF2	.
	positive regulation of cysteine-type endopeptidase activity (GO:2001056)	4/55	0.0563884	0.715796	2.7653	CYFIP2;DAPK1;PERP;FYN	.
	positive regulation of potassium ion transmembrane transport (GO:1901381)	2/15	0.0578272	0.716243	5.06971	NOS1AP;AKAP6	.
	regulation of wound healing (GO:0061041)	3/34	0.0593195	0.717317	3.35495	CAV1;CD109;F2RL1	.
	positive regulation of stress-activated protein kinase signaling cascade (GO:0070304)	2/15	0.0578272	0.717986	5.06971	TGFB2;MID1	.
	epithelial tube morphogenesis (GO:0060562)	3/34	0.0593195	0.71902	3.35495	PODXL;GATA3;MET	.
	positive regulation of protein import (GO:1904591)	2/15	0.0578272	0.719737	5.06971	JUP;ARHGEF5	.
	positive regulation of coenzyme metabolic process (GO:0051197)	2/15	0.0578272	0.721497	5.06971	PFKFB2;MLXIPL	.
	regulation of transforming growth factor beta receptor signaling pathway (GO:0017015)	5/79	0.0570755	0.72272	2.40651	CDKN1C;ITGA3;CD109;CAV1;DKK3	.
	substrate-dependent cell migration (GO:0006929)	2/15	0.0578272	0.723265	5.06971	P2RY12;ITGA2	.
	positive regulation of glycolytic process (GO:0045821)	2/15	0.0578272	0.725042	5.06971	PFKFB2;MLXIPL	.
	endocardial cushion morphogenesis (GO:0003203)	2/15	0.0578272	0.726828	5.06971	TGFB2;BMP2	.
	positive regulation of vasoconstriction (GO:0045907)	2/15	0.0578272	0.728622	5.06971	CAV1;TRPM4	.
	regulation of protein homooligomerization (GO:0032462)	2/15	0.0578272	0.730426	5.06971	RHOC;CRYAB	.
	protein oligomerization (GO:0051259)	10/217	0.0616185	0.736391	1.7522	CLDN3;AHNAK;SYT1;CAV1;DPYSL3;RASEF;ANXA6;LY6G6C;CLDN1;CRYAB	.
	negative regulation of cell cycle process (GO:0010948)	5/81	0.0622443	0.740403	2.34709	TOM1L1;MLXIPL;CCND1;CHMP4C;CDC7	.
	myoblast differentiation (GO:0045445)	2/16	0.0649673	0.741673	4.75285	EPAS1;SDC1	.
	BMP signaling pathway (GO:0030509)	5/81	0.0622443	0.742133	2.34709	TGFBR3;FAM83G;TGFB2;BMP2;FSTL1	.
	regulation of membrane repolarization (GO:0060306)	2/16	0.0649673	0.743336	4.75285	CAV1;AKAP6	.
	epidermal growth factor receptor signaling pathway (GO:0007173)	4/57	0.0627416	0.744583	2.66827	GRB7;GAB1;ERBIN;PLCE1	.
	regulation of stem cell proliferation (GO:0072091)	2/16	0.0649673	0.745007	4.75285	YAP1;EPCAM	.
	negative regulation of intracellular signal transduction (GO:1902532)	8/161	0.0629649	0.745498	1.88933	WWC1;CAV1;DLG5;ITPR1;OTUD7B;SH3BP4;TRIB3;CGNL1	.
	positive regulation of G2/M transition of mitotic cell cycle (GO:0010971)	2/16	0.0649673	0.746685	4.75285	CCND1;CDC7	.
	sulfur compound catabolic process (GO:0044273)	3/35	0.0636628	0.74683	3.2591	CHAC1;GGT1;DCN	.
	regulation of osteoblast proliferation (GO:0033688)	2/16	0.0649673	0.74837	4.75285	BMP2;PLXNB1	.
	carboxylic acid transmembrane transport (GO:1905039)	3/35	0.0636628	0.748551	3.2591	SLC38A1;SLC7A8;SLC7A11	.
	neuron apoptotic process (GO:0051402)	2/16	0.0649673	0.750063	4.75285	ERBB3;LIG4	.
	negative regulation of epithelial cell migration (GO:0010633)	3/35	0.0636628	0.75028	3.2591	TACSTD2;DCN;PFN2	.
	regulation of bicellular tight junction assembly (GO:2000810)	2/16	0.0649673	0.751764	4.75285	TJP1;OCLN	.
	regulation of microtubule polymerization (GO:0031113)	3/35	0.0636628	0.752017	3.2591	CAMSAP3;TUBB4A;MET	.
	neutrophil migration (GO:1990266)	4/58	0.0660535	0.752391	2.62226	TGFB2;CXADR;CCL22;CX3CL1	.
	sympathetic nervous system development (GO:0048485)	2/16	0.0649673	0.753473	4.75285	SEMA3F;GATA3	.
	regulation of toll-like receptor 4 signaling pathway (GO:0034143)	2/16	0.0649673	0.755189	4.75285	ACOD1;F2RL1	.
	positive regulation of cardiac muscle tissue growth (GO:0055023)	2/16	0.0649673	0.756913	4.75285	TGFBR3;AKAP6	.
	neuron projection morphogenesis (GO:0048812)	8/163	0.0666566	0.75757	1.86615	FARP1;PARD6B;PARD3;PLXNB1;ANK3;NYAP2;S100B;DCLK1	.
	ephrin receptor signaling pathway (GO:0048013)	5/82	0.0649247	0.758148	2.31846	EFNA1;YES1;ARHGEF28;FYN;EPHA1	.
	positive regulation of protein secretion (GO:0050714)	5/82	0.0649247	0.759887	2.31846	UNC13B;TGFB2;F2RL1;EZR;MYH10	.
	establishment of protein localization to membrane (GO:0090150)	5/83	0.0676688	0.767364	2.29053	ICMT;PARD3;KIF13A;ANK3;SPTBN1	.
	cardiac muscle tissue morphogenesis (GO:0055008)	3/36	0.0681486	0.767687	3.16857	TGFBR3;BMP2;PKP2	.
	negative regulation of protein kinase activity (GO:0006469)	6/109	0.0679353	0.768678	2.093	CDKN1C;DBNDD2;CAV1;TRIB3;EPHA1;DCN	.
	regulation of filopodium assembly (GO:0051489)	3/36	0.0681486	0.769385	3.16857	MYO10;DPYSL3;FNBP1L	.
	cell morphogenesis (GO:0000902)	4/59	0.0694546	0.780676	2.57782	CYFIP2;TGFB2;CDH1;SHROOM3	.
	regulation of neuron differentiation (GO:0045664)	5/84	0.0704764	0.785243	2.26326	CASZ1;BMP2;ZEB1;YWHAH;FGFR1	.
	cellular response to peptide hormone stimulus (GO:0071375)	6/110	0.0703442	0.785485	2.07397	IRS1;CAV1;MARS;RAB13;TRIB3;ADCY6	.
	cellular response to insulin stimulus (GO:0032869)	6/110	0.0703442	0.787207	2.07397	BAIAP2L1;IRS1;MARS;RAB13;GAB1;TRIB3	.
	positive regulation of transferase activity (GO:0051347)	7/137	0.0702066	0.787394	1.94277	DDR1;ERBB3;ERBB2;TRIB3;EPHA1;MET;FGFR1	.
	response to steroid hormone (GO:0048545)	3/37	0.0727738	0.793514	3.08293	YAP1;TGFB2;CAV1	.
	positive regulation of protein binding (GO:0032092)	4/60	0.0729442	0.793676	2.53485	BMP2;TRAF4;CAV1;TRIB3	.
	platelet-derived growth factor receptor signaling pathway (GO:0048008)	2/17	0.0723837	0.794353	4.47327	PDGFC;PLAT	.
	negative regulation of Ras protein signal transduction (GO:0046580)	3/37	0.0727738	0.795214	3.08293	TGFB2;RASAL2;MET	.
	regulation of protein localization to membrane (GO:1905475)	2/17	0.0723837	0.796064	4.47327	FYN;SPTBN1	.
	positive regulation of stress fiber assembly (GO:0051496)	3/37	0.0727738	0.79692	3.08293	EPHA1;ARHGEF5;PFN2	.
	pharyngeal system development (GO:0060037)	2/17	0.0723837	0.797784	4.47327	TGFB2;GATA3	.
	negative regulation of lipid biosynthetic process (GO:0051055)	2/17	0.0723837	0.799511	4.47327	BMP2;TRIB3	.
	cellular response to gamma radiation (GO:0071480)	2/17	0.0723837	0.801245	4.47327	YAP1;CRYAB	.
	positive regulation of cell cycle G2/M phase transition (GO:1902751)	2/17	0.0723837	0.802987	4.47327	CCND1;CDC7	.
	response to cytokine (GO:0034097)	7/138	0.0723752	0.804642	1.92869	DPYSL3;AKAP6;AFF3;PTPN13;PTPN4;SELE;PTPN14	.
	phosphatidylinositol metabolic process (GO:0046488)	6/112	0.0753083	0.817655	2.03694	CDS1;RAB4A;PIP4K2C;SYNJ2;PTPN13;FAM126A	.
	intracellular protein transport (GO:0006886)	14/347	0.0758524	0.821814	1.53406	RAB4A;RAB27B;AKAP6;PRICKLE1;HID1;CAMSAP3;RAB25;MYO6;KIF13A;RAB13;SNX9;STX3;AP1M2;YWHAH	.
	regulation of ossification (GO:0030278)	3/38	0.0775353	0.836496	3.0018	TGFB2;BMP2;BMP2K	.
	positive regulation of canonical Wnt signaling pathway (GO:0090263)	6/113	0.0778631	0.838261	2.01891	SCEL;JUP;CAV1;DIXDC1;AXIN2;TRPM4	.
	homotypic cell-cell adhesion (GO:0034109)	3/38	0.0775353	0.838268	3.0018	P2RY12;MEGF10;DSC2	.
	establishment of epithelial cell polarity (GO:0090162)	2/18	0.080057	0.851106	4.22476	CAMSAP3;PARD3	.
	cellular response to BMP stimulus (GO:0071773)	5/87	0.0792777	0.851693	2.18522	TGFBR3;FAM83G;TGFB2;BMP2;FSTL1	.
	positive regulation of carbohydrate metabolic process (GO:0045913)	2/18	0.080057	0.852883	4.22476	PFKFB2;MLXIPL	.
	regulation of epithelial cell differentiation (GO:0030856)	2/18	0.080057	0.854667	4.22476	CAV1;CD24	.
	heart trabecula morphogenesis (GO:0061384)	2/18	0.080057	0.856459	4.22476	TGFBR3;TGFB2	.
	regulation of cellular response to transforming growth factor beta stimulus (GO:1903844)	2/18	0.080057	0.858258	4.22476	ITGA3;DKK3	.
	Golgi to plasma membrane transport (GO:0006893)	3/39	0.0824295	0.867295	2.92483	KIF13A;ANK3;SPTBN1	.
	regulation of RNA metabolic process (GO:0051252)	3/39	0.0824295	0.869087	2.92483	AHNAK;ESRP2;ESRP1	.
	regulation of plasma membrane bounded cell projection assembly (GO:0120032)	3/39	0.0824295	0.870886	2.92483	MYO10;PODXL;CAV1	.
	inositol lipid-mediated signaling (GO:0048017)	3/39	0.0824295	0.872693	2.92483	IRS1;EZR;FGFR1	.
	signal transduction by p53 class mediator (GO:0072331)	3/39	0.0824295	0.874507	2.92483	MYO6;JMY;TP53BP2	.
	regulation of proteolysis (GO:0030162)	4/63	0.0839338	0.877693	2.41415	CYFIP2;PERP;CAV1;PLAT	.
	adenylate cyclase-inhibiting G-protein coupled receptor signaling pathway (GO:0007193)	4/63	0.0839338	0.879495	2.41415	P2RY12;GABBR1;ADCY6;GNAI1	.
	kidney development (GO:0001822)	4/63	0.0839338	0.881305	2.41415	TFAP2A;TGFB2;GATA3;SULF2	.
	regulation of protein phosphorylation (GO:0001932)	11/261	0.0850039	0.887066	1.60249	EFNA1;TGFB2;BMP2;CCND1;ERBB2;PLCE1;PAK6;FYN;AXIN2;CD24;PROM2	.
	positive regulation of neuron apoptotic process (GO:0043525)	2/19	0.0879686	0.894231	4.0024	TFAP2A;TGFB2	.
	striated muscle cell differentiation (GO:0051146)	2/19	0.0879686	0.896015	4.0024	BMP2;SDC1	.
	regulation of Ras protein signal transduction (GO:0046578)	5/90	0.0886388	0.897468	2.11238	TGFB2;PLCE1;EPS8L1;EPS8L2;RASAL2	.
	positive regulation of toll-like receptor signaling pathway (GO:0034123)	2/19	0.0879686	0.897807	4.0024	CAV1;F2RL1	.
	positive regulation of response to external stimulus (GO:0032103)	5/90	0.0886388	0.899252	2.11238	ACOD1;F2RL1;STX3;ETS1;CX3CL1	.
	endocardial cushion development (GO:0003197)	2/19	0.0879686	0.899607	4.0024	TGFB2;BMP2	.
	muscle tissue morphogenesis (GO:0060415)	2/19	0.0879686	0.901413	4.0024	TGFBR3;BMP2	.
	vesicle transport along microtubule (GO:0047496)	2/19	0.0879686	0.903227	4.0024	KIF13A;BICDL2	.
	NADP metabolic process (GO:0006739)	2/19	0.0879686	0.905048	4.0024	TP53I3;ME1	.
	negative regulation of cytokine secretion (GO:0050710)	3/40	0.0874532	0.905221	2.85171	F2RL1;FCGR2B;EZR	.
	positive regulation of protein polymerization (GO:0032273)	4/64	0.0877672	0.906632	2.37643	BAIAP2L1;CDC42EP3;MET;PFN2	.
	positive regulation of heart contraction (GO:0045823)	2/19	0.0879686	0.906876	4.0024	TGFB2;TRPM4	.
	ameboidal-type cell migration (GO:0001667)	3/40	0.0874532	0.90706	2.85171	AMOTL2;SEMA3F;AMOT	.
	positive regulation of epithelial to mesenchymal transition (GO:0010718)	3/40	0.0874532	0.908908	2.85171	TGFB2;BMP2;AXIN2	.
	negative regulation of transport (GO:0051051)	3/40	0.0874532	0.910763	2.85171	ERBB3;PACSIN3;CRYAB	.
	positive regulation of protein serine/threonine kinase activity (GO:0071902)	6/118	0.0913596	0.914133	1.93336	CCND1;PDGFC;ERBB2;CCNYL1;CD24;FGFR1	.
	skeletal system development (GO:0001501)	7/146	0.0911362	0.915488	1.82301	KIAA1217;TGFB2;BMP2;PLS3;TBX3;FGFR1;SULF2	.
	negative regulation of blood vessel morphogenesis (GO:2000181)	4/65	0.0916839	0.915583	2.33987	TGFB2;HSPG2;DCN;AMOT	.
	negative regulation of kinase activity (GO:0033673)	5/91	0.0918815	0.915764	2.08917	CDKN1C;DBNDD2;TRIB3;EPHA1;DCN	.
	plasma membrane bounded cell projection organization (GO:0120036)	6/118	0.0913596	0.915929	1.93336	LIMA1;DBNDD2;RAB25;RAB13;STX3;L1CAM	.
	negative regulation of apoptotic process (GO:0043066)	18/485	0.091092	0.916849	1.41116	DDR1;TFAP2A;PLK2;CAV1;FHL2;ASNS;LIG4;TBX3;NRBP2;KRT18;ERBB3;ERBB2;ZNF304;ATF5;EPHA1;CRYAB;MET;FGFR1	.
	negative regulation of proteolysis (GO:0045861)	3/41	0.0926027	0.917576	2.78216	EFNA1;PLAT;CHAC1	.
	positive regulation of transcription, DNA-templated (GO:0045893)	37/1120	0.0909896	0.917628	1.25611	CDKN1C;YAP1;FOXA1;EHF;CASZ1;EPAS1;FHL2;GATA3;ETS1;EPCAM;CDH1;MYO6;ERBB2;CAMTA1;ZNF304;TEAD3;YWHAH;IVNS1ABP;TFAP2A;AFAP1L2;JUP;GRHL3;SMARCA1;GRHL1;ST18;DCN;MLXIPL;BMP2;ELF3;IRF4;F2RL1;TAF4B;IRF6;ATF5;MET;ZNF750;CREB5	.
	protein transport (GO:0015031)	13/326	0.0908532	0.918068	1.51625	RAB4A;RAB27B;ANK3;VLDLR;HID1;RAB25;MYO6;KIF13A;RAB13;SNX9;STX3;SPTBN1;YWHAH	.
	negative regulation of cell projection organization (GO:0031345)	3/41	0.0926027	0.919361	2.78216	DPYSL3;FYN;ADCY6	.
	regulation of stress-activated MAPK cascade (GO:0032872)	3/41	0.0926027	0.921153	2.78216	TGFB2;F2RL1;MID1	.
	brain development (GO:0007420)	6/119	0.0942018	0.931612	1.91712	NDRG4;ADGRG1;PHGDH;SMARCA1;HSPG2;NES	.
	negative regulation of plasma membrane bounded cell projection assembly (GO:0120033)	2/20	0.0961007	0.934099	3.80228	TACSTD2;PFN2	.
	vesicle cytoskeletal trafficking (GO:0099518)	2/20	0.0961007	0.935882	3.80228	BICDL2;FNBP1L	.
	negative regulation of protein depolymerization (GO:1901880)	2/20	0.0961007	0.937671	3.80228	CAMSAP3;LIMA1	.
	regulation of anoikis (GO:2000209)	2/20	0.0961007	0.939467	3.80228	CAV1;ZNF304	.
	axon extension (GO:0048675)	2/20	0.0961007	0.941271	3.80228	PLXNB1;SEMA3F	.
	regulation of calcium ion transmembrane transport (GO:1903169)	2/20	0.0961007	0.943081	3.80228	NOS1AP;FYN	.
	neuromuscular junction development (GO:0007528)	2/20	0.0961007	0.944898	3.80228	UNC13B;ANK3	.
	ureteric bud morphogenesis (GO:0060675)	2/20	0.0961007	0.946722	3.80228	BMP2;GATA3	.
	regulation of programmed cell death (GO:0043067)	11/268	0.0976947	0.947787	1.56064	BEX2;TGFB2;BMP2;TP53I3;DAPK1;CASP6;PERP;NOS1AP;TP53BP2;PAK6;FYN	.
	positive regulation of interleukin-2 production (GO:0032743)	2/20	0.0961007	0.948553	3.80228	IRF4;SPTBN1	.
	positive regulation of autophagy (GO:0010508)	4/67	0.0997619	0.964176	2.27002	DAPK1;PLK2;SH3BP4;DCN	.
	regulation of cell differentiation (GO:0045595)	6/121	0.100027	0.964913	1.88543	TFAP2A;MEGF10;SINHCAF;CD24;PHLDB2;FGFR1	.
	positive regulation of synaptic transmission (GO:0050806)	4/67	0.0997619	0.966005	2.27002	UNC13B;SYT1;PLK2;PRKCZ	.
	glutamate metabolic process (GO:0006536)	2/21	0.104436	0.976078	3.62122	TAT;GGT1	.
	negative regulation of cell cycle arrest (GO:0071157)	2/21	0.104436	0.977869	3.62122	MLXIPL;CCND1	.
	synaptic transmission, glutamatergic (GO:0035249)	2/21	0.104436	0.979667	3.62122	UNC13B;SLC1A4	.
	embryonic skeletal system development (GO:0048706)	2/21	0.104436	0.981471	3.62122	KIAA1217;SULF2	.
	vesicle fusion (GO:0006906)	5/94	0.101969	0.981792	2.02249	SYT1;RAB13;STX3;TC2N;SYTL2	.
	long-term synaptic potentiation (GO:0060291)	2/21	0.104436	0.983282	3.62122	PLK2;PRKCZ	.
	limb morphogenesis (GO:0035108)	2/21	0.104436	0.9851	3.62122	TGFB2;TBX3	.
	ventricular septum morphogenesis (GO:0060412)	2/21	0.104436	0.986924	3.62122	TGFBR3;TGFB2	.
	membrane depolarization (GO:0051899)	3/43	0.103265	0.988668	2.65275	CAV1;CACNA1H;YWHAH	.
	negative regulation of protein tyrosine kinase activity (GO:0061099)	2/21	0.104436	0.988755	3.62122	CAV1;CBLC	.
	sulfur compound biosynthetic process (GO:0044272)	6/122	0.10301	0.989941	1.86997	B4GALT3;CBS;CHAC1;GGT1;OPLAH;DCN	.
	negative regulation of ERBB signaling pathway (GO:1901185)	3/43	0.103265	0.990526	2.65275	ERBB3;ERBB2;CBLC	.
	embryonic skeletal system morphogenesis (GO:0048704)	2/21	0.104436	0.990593	3.62122	TFAP2A;IRX5	.
	negative regulation of G-protein coupled receptor protein signaling pathway (GO:0045744)	2/21	0.104436	0.992437	3.62122	MET;LY6G6E	.
	response to interferon-gamma (GO:0034341)	4/68	0.103921	0.993084	2.23664	CCL22;DAPK1;ACOD1;CX3CL1	.
	positive regulation of cellular component movement (GO:0051272)	2/21	0.104436	0.994289	3.62122	CAVIN1;ETS1	.
	positive regulation of transcription from RNA polymerase I promoter (GO:0045943)	2/21	0.104436	0.996147	3.62122	MARS;ERBB2	.
	positive regulation of intracellular protein transport (GO:0090316)	7/152	0.106834	0.99666	1.75105	JUP;ABLIM3;TMEM30B;ERBB2;RHOU;FYN;ANK3	.
	negative regulation of angiogenesis (GO:0016525)	4/69	0.108157	1	2.20422	TGFB2;HSPG2;DCN;AMOT	.
	carboxylic acid biosynthetic process (GO:0046394)	3/44	0.10877	1	2.59246	ASNS;PYCR1;RIMKLB	.
	negative regulation of immune response (GO:0050777)	3/44	0.10877	1	2.59246	TGFB2;ACOD1;FCGR2B	.
	positive regulation of actin filament bundle assembly (GO:0032233)	3/44	0.10877	1	2.59246	EPHA1;ARHGEF5;PFN2	.
	positive regulation of endothelial cell migration (GO:0010595)	4/70	0.112471	1	2.17273	GATA3;ETS1;MET;FGFR1	.
	Rab protein signal transduction (GO:0032482)	4/70	0.112471	1	2.17273	RAB4A;RAB25;RAB13;RAB27B	.
	calcium-mediated signaling (GO:0019722)	4/70	0.112471	1	2.17273	PLCE1;ADGRL1;SELE;TRPM4	.
	cell morphogenesis involved in neuron differentiation (GO:0048667)	5/97	0.112584	1	1.95994	FARP1;PARD6B;PARD3;ANK3;S100B	.
	antigen processing and presentation of exogenous peptide antigen via MHC class II (GO:0019886)	5/97	0.112584	1	1.95994	ACTR1B;CTSV;FCGR2B;AP1M2;SPTBN2	.
	antigen processing and presentation of exogenous peptide antigen (GO:0002478)	5/97	0.112584	1	1.95994	ACTR1B;CTSV;FCGR2B;AP1M2;SPTBN2	.
	positive regulation of apoptotic process (GO:0043065)	12/307	0.112761	1	1.48623	UNC13B;FOXA1;TFAP2A;TGFB2;BMP2;RASSF2;DAPK1;JMY;ARHGEF16;TP53BP2;PAWR;ARHGEF5	.
	regulation of calcium ion transport into cytosol (GO:0010522)	2/22	0.112959	1	3.45662	CAV1;FYN	.
	negative regulation of protein polymerization (GO:0032272)	2/22	0.112959	1	3.45662	TUBB4A;PFN2	.
	outflow tract septum morphogenesis (GO:0003148)	2/22	0.112959	1	3.45662	TGFB2;PARVA	.
	peripheral nervous system development (GO:0007422)	2/22	0.112959	1	3.45662	ERBB3;ADGRG6	.
	positive regulation of interleukin-10 production (GO:0032733)	2/22	0.112959	1	3.45662	IRF4;PRKCZ	.
	regulation of membrane protein ectodomain proteolysis (GO:0051043)	2/22	0.112959	1	3.45662	PACSIN3;SNX9	.
	regulation of ERBB signaling pathway (GO:1901184)	2/22	0.112959	1	3.45662	ERBB3;ERBB2	.
	negative regulation of GTPase activity (GO:0034260)	2/22	0.112959	1	3.45662	SH3BP4;F11R	.
	positive regulation of phosphatase activity (GO:0010922)	2/22	0.112959	1	3.45662	BMP2;AKAP6	.
	digestive system development (GO:0055123)	2/22	0.112959	1	3.45662	ITGB4;GATA3	.
	positive regulation of macromolecule metabolic process (GO:0010604)	11/276	0.11351	1	1.5154	TFAP2A;EPB41L4B;BMP2;RNF207;NOS1AP;PKP1;ANK3;PKP3;EZR;ETS1;SELE	.
	phosphatidylinositol biosynthetic process (GO:0006661)	5/98	0.116236	1	1.93994	CDS1;RAB4A;PIP4K2C;SYNJ2;PTPN13	.
	antigen processing and presentation of peptide antigen via MHC class II (GO:0002495)	5/98	0.116236	1	1.93994	ACTR1B;CTSV;FCGR2B;AP1M2;SPTBN2	.
	response to molecule of bacterial origin (GO:0002237)	5/98	0.116236	1	1.93994	ERBIN;ACOD1;CD24;FCGR2B;SELE	.
	positive regulation of growth (GO:0045927)	4/71	0.116859	1	2.14213	TGFB2;SLC44A4;ERBB2;AKAP6	.
	regulation of cation channel activity (GO:2001257)	4/71	0.116859	1	2.14213	AHNAK;DAPK1;ANK3;JPH1	.
	organelle membrane fusion (GO:0090174)	4/71	0.116859	1	2.14213	SYT1;STX3;TC2N;SYTL2	.
	response to insulin (GO:0032868)	4/71	0.116859	1	2.14213	IRS1;MARS;RAB13;TRIB3	.
	MAPK cascade (GO:0000165)	11/278	0.11768	1	1.5045	ERBB3;IRS1;ERBB2;FYN;RASAL2;GFRA2;CSF2RA;MET;SPTBN1;SPTBN2;FGFR1	.
	pyruvate metabolic process (GO:0006090)	3/46	0.120109	1	2.47975	PFKFB2;ME1;CELSR1	.
	regulation of neuron death (GO:1901214)	4/72	0.121321	1	2.11238	TRIM2;RRAS2;FYN;FCGR2B	.
	regulation of fat cell differentiation (GO:0045598)	4/72	0.121321	1	2.11238	BMP2;TRIB3;GATA3;TRPM4	.
	negative regulation of cell cycle (GO:0045786)	4/72	0.121321	1	2.11238	BMP2;TP53BP2;PTPRK;GATA3	.
	neuronal action potential (GO:0019228)	2/23	0.121654	1	3.30633	ANK3;CACNA1H	.
	melanosome organization (GO:0032438)	2/23	0.121654	1	3.30633	KIF13A;LYST	.
	positive regulation of protein oligomerization (GO:0032461)	2/23	0.121654	1	3.30633	SNX9;RHOC	.
	lamellipodium assembly (GO:0030032)	2/23	0.121654	1	3.30633	ABLIM3;RHOD	.
	protein K48-linked deubiquitination (GO:0071108)	2/23	0.121654	1	3.30633	OTUD7B;YOD1	.
	membrane assembly (GO:0071709)	2/23	0.121654	1	3.30633	ANK3;SPTBN1	.
	positive regulation of ATP metabolic process (GO:1903580)	2/23	0.121654	1	3.30633	PFKFB2;MLXIPL	.
	regulation of smooth muscle contraction (GO:0006940)	2/23	0.121654	1	3.30633	CAV1;PLCE1	.
	regulation of dendritic spine morphogenesis (GO:0061001)	2/23	0.121654	1	3.30633	EFNA1;LZTS3	.
	regulation of monooxygenase activity (GO:0032768)	2/23	0.121654	1	3.30633	CAV1;NOS1AP	.
	cellular response to metal ion (GO:0071248)	5/100	0.123707	1	1.90114	TFAP2A;SYT1;CDH1;ANK3;CACNA1H	.
	vesicle-mediated transport (GO:0016192)	15/410	0.125408	1	1.39108	SYT1;RAB27B;FNBP1L;TC2N;SYTL2;CECR2;MYO5B;MYO6;RAB13;KIF13A;SNX9;RHOU;STX3;KIF1A;SPTBN2	.
	positive regulation of cytokine secretion (GO:0050715)	4/73	0.125855	1	2.08344	F2RL1;GATA3;PRKCZ;SPTBN1	.
	canonical Wnt signaling pathway (GO:0060070)	4/73	0.125855	1	2.08344	CAV1;TCF7;DIXDC1;GATA3	.
	positive regulation of organelle assembly (GO:1902117)	3/47	0.125936	1	2.42699	SDC1;PIP4K2C;ARHGAP35	.
	generation of neurons (GO:0048699)	6/130	0.128497	1	1.7549	YAP1;NRBP2;TGFB2;CDH1;SMARCA1;FGFR1	.
	positive regulation of transcription from RNA polymerase II promoter (GO:0045944)	28/848	0.128657	1	1.25547	YAP1;FOXA1;EHF;EPAS1;WWC1;GATA3;ETS1;EPCAM;MYO6;CAMTA1;ZNF304;TEAD3;TFAP2A;TGFB2;JUP;GRHL3;GRHL1;ST18;DCN;MLXIPL;BMP2;IRF4;F2RL1;TAF4B;IRF6;ATF5;MET;ZNF750	.
	negative regulation of cytoskeleton organization (GO:0051494)	2/24	0.130505	1	3.16857	LIMA1;PFN2	.
	camera-type eye development (GO:0043010)	2/24	0.130505	1	3.16857	ALDH1A3;NES	.
	positive regulation of endopeptidase activity (GO:0010950)	2/24	0.130505	1	3.16857	EFNA1;FYN	.
	regulation of chemotaxis (GO:0050920)	2/24	0.130505	1	3.16857	F2RL1;STX3	.
	positive regulation of chemotaxis (GO:0050921)	3/48	0.131862	1	2.37643	F2RL1;STX3;MET	.
	retinoid metabolic process (GO:0001523)	4/75	0.135133	1	2.02788	ALDH1A3;RDH11;SDC1;HSPG2	.
	regulation of defense response (GO:0031347)	4/75	0.135133	1	2.02788	OTUD7B;GGT1;FCGR2B;SELE	.
	positive regulation of angiogenesis (GO:0045766)	5/103	0.135317	1	1.84577	JUP;GAB1;ZNF304;EPHA1;ETS1	.
	protein heterooligomerization (GO:0051291)	3/49	0.137883	1	2.32793	CLDN3;COL6A2;CLDN1	.
	glutathione metabolic process (GO:0006749)	3/49	0.137883	1	2.32793	CHAC1;OPLAH;GGT1	.
	gonad development (GO:0008406)	3/49	0.137883	1	2.32793	TGFB2;IRX5;GATA3	.
	positive regulation of cytosolic calcium ion concentration (GO:0007204)	6/133	0.138772	1	1.71531	CAV1;PLCE1;F2RL1;CD24;JPH1;TRPM4	.
	positive regulation of protein modification process (GO:0031401)	7/163	0.139086	1	1.63288	EFNA1;BMP2;CCND1;NOS1AP;ERBB2;AXIN2;PROM2	.
	positive regulation of vasculature development (GO:1904018)	5/104	0.139291	1	1.82802	JUP;GAB1;ZNF304;EPHA1;ETS1	.
	negative regulation of wound healing (GO:0061045)	2/25	0.139499	1	3.04183	CD109;PHLDB2	.
	regulation of centrosome duplication (GO:0010824)	2/25	0.139499	1	3.04183	PLK2;CHMP4C	.
	regulation of voltage-gated calcium channel activity (GO:1901385)	2/25	0.139499	1	3.04183	AHNAK;NOS1AP	.
	glial cell differentiation (GO:0010001)	2/25	0.139499	1	3.04183	ERBB3;ADGRG6	.
	lamellipodium organization (GO:0097581)	2/25	0.139499	1	3.04183	ABLIM3;RHOD	.
	inorganic cation import across plasma membrane (GO:0098659)	2/25	0.139499	1	3.04183	TRPV6;TRPM4	.
	regulation of ryanodine-sensitive calcium-release channel activity (GO:0060314)	2/25	0.139499	1	3.04183	AKAP6;JPH1	.
	peptide catabolic process (GO:0043171)	2/25	0.139499	1	3.04183	CHAC1;GGT1	.
	in utero embryonic development (GO:0001701)	2/25	0.139499	1	3.04183	BMP2;LIG4	.
	response to amyloid-beta (GO:1904645)	2/25	0.139499	1	3.04183	FYN;FCGR2B	.
	positive regulation of filopodium assembly (GO:0051491)	2/25	0.139499	1	3.04183	DPYSL3;FNBP1L	.
	cellular response to epidermal growth factor stimulus (GO:0071364)	2/25	0.139499	1	3.04183	MARS;ERBB2	.
	respiratory tube development (GO:0030323)	2/25	0.139499	1	3.04183	CCDC39;ITGA3	.
	positive regulation of Rho protein signal transduction (GO:0035025)	2/25	0.139499	1	3.04183	ADGRG1;F2RL1	.
	positive regulation of embryonic development (GO:0040019)	2/25	0.139499	1	3.04183	GATA3;PHLDB2	.
	response to interleukin-1 (GO:0070555)	4/76	0.139874	1	2.0012	CCL22;ACOD1;SELE;CX3CL1	.
	regulation of blood vessel endothelial cell migration (GO:0043535)	3/50	0.143996	1	2.28137	JUP;ETS1;FGFR1	.
	heart morphogenesis (GO:0003007)	3/50	0.143996	1	2.28137	TGFBR3;TGFB2;BMP2	.
	neurogenesis (GO:0022008)	3/50	0.143996	1	2.28137	TGFB2;CDH1;CHAC1	.
	regulation of protein localization to early endosome (GO:1902965)	1/6	0.147798	1	6.33714	EZR	.
	pyrimidine-containing compound biosynthetic process (GO:0072528)	1/6	0.147798	1	6.33714	ACOD1	.
	regulation of glomerular filtration (GO:0003093)	1/6	0.147798	1	6.33714	F2RL1	.
	protein localization to non-motile cilium (GO:0097499)	1/6	0.147798	1	6.33714	TULP3	.
	hindlimb morphogenesis (GO:0035137)	1/6	0.147798	1	6.33714	AFF3	.
	polyamine biosynthetic process (GO:0006596)	1/6	0.147798	1	6.33714	SMOX	.
	embryonic camera-type eye morphogenesis (GO:0048596)	1/6	0.147798	1	6.33714	TFAP2A	.
	arginine biosynthetic process (GO:0006526)	1/6	0.147798	1	6.33714	ACOD1	.
	transmembrane receptor protein tyrosine phosphatase signaling pathway (GO:0007185)	1/6	0.147798	1	6.33714	PTPRF	.
	negative regulation of transforming growth factor beta production (GO:0071635)	1/6	0.147798	1	6.33714	CD24	.
	galactosylceramide metabolic process (GO:0006681)	1/6	0.147798	1	6.33714	B4GALT3	.
	positive regulation of hormone metabolic process (GO:0032352)	1/6	0.147798	1	6.33714	GATA3	.
	mineralocorticoid biosynthetic process (GO:0006705)	1/6	0.147798	1	6.33714	CACNA1H	.
	determination of liver left/right asymmetry (GO:0071910)	1/6	0.147798	1	6.33714	CCDC39	.
	positive regulation of aspartic-type peptidase activity (GO:1905247)	1/6	0.147798	1	6.33714	EFNA1	.
	cellular response to iron ion (GO:0071281)	1/6	0.147798	1	6.33714	TFAP2A	.
	T-helper 17 cell lineage commitment (GO:0072540)	1/6	0.147798	1	6.33714	IRF4	.
	positive regulation of myelination (GO:0031643)	1/6	0.147798	1	6.33714	PARD3	.
	positive regulation of protein localization to early endosome (GO:1902966)	1/6	0.147798	1	6.33714	EZR	.
	regulation of phagocytosis, engulfment (GO:0060099)	1/6	0.147798	1	6.33714	F2RL1	.
	regulation of nuclear cell cycle DNA replication (GO:0033262)	1/6	0.147798	1	6.33714	CDC7	.
	negative regulation of acute inflammatory response (GO:0002674)	1/6	0.147798	1	6.33714	FCGR2B	.
	response to gonadotropin (GO:0034698)	1/6	0.147798	1	6.33714	TGFBR3	.
	astral microtubule organization (GO:0030953)	1/6	0.147798	1	6.33714	EZR	.
	cellular response to monoamine stimulus (GO:0071868)	1/6	0.147798	1	6.33714	ADCY6	.
	negative regulation of cytokinesis (GO:0032466)	1/6	0.147798	1	6.33714	CHMP4C	.
	protein deubiquitination involved in ubiquitin-dependent protein catabolic process (GO:0071947)	1/6	0.147798	1	6.33714	OTUD7B	.
	ear development (GO:0043583)	1/6	0.147798	1	6.33714	GATA3	.
	male genitalia development (GO:0030539)	1/6	0.147798	1	6.33714	TBX3	.
	regulation of wound healing, spreading of epidermal cells (GO:1903689)	1/6	0.147798	1	6.33714	PHLDB2	.
	azole transport (GO:0045117)	1/6	0.147798	1	6.33714	SLC44A4	.
	regulation of epithelial to mesenchymal transition involved in endocardial cushion formation (GO:1905005)	1/6	0.147798	1	6.33714	TGFB2	.
	positive regulation of osteoblast proliferation (GO:0033690)	1/6	0.147798	1	6.33714	BMP2	.
	negative regulation of dendritic spine development (GO:0061000)	1/6	0.147798	1	6.33714	EFNA1	.
	positive regulation of T-helper 2 cell differentiation (GO:0045630)	1/6	0.147798	1	6.33714	PRKCZ	.
	forebrain regionalization (GO:0021871)	1/6	0.147798	1	6.33714	BMP2	.
	regulation of protein localization to cell cortex (GO:1904776)	1/6	0.147798	1	6.33714	GNAI1	.
	negative regulation of leukocyte degranulation (GO:0043301)	1/6	0.147798	1	6.33714	FCGR2B	.
	lymphoid progenitor cell differentiation (GO:0002320)	1/6	0.147798	1	6.33714	LIG4	.
	response to UV-A (GO:0070141)	1/6	0.147798	1	6.33714	CCND1	.
	trigeminal nerve development (GO:0021559)	1/6	0.147798	1	6.33714	TFAP2A	.
	definitive hemopoiesis (GO:0060216)	1/6	0.147798	1	6.33714	TGFBR3	.
	corticosteroid receptor signaling pathway (GO:0031958)	1/6	0.147798	1	6.33714	YWHAH	.
	gland morphogenesis (GO:0022612)	1/6	0.147798	1	6.33714	TGFB2	.
	regulation of transforming growth factor beta2 production (GO:0032909)	1/6	0.147798	1	6.33714	TGFB2	.
	positive regulation of protein localization to endosome (GO:1905668)	1/6	0.147798	1	6.33714	EZR	.
	regulation of tooth mineralization (GO:0070170)	1/6	0.147798	1	6.33714	TFAP2A	.
	plus-end-directed organelle transport along microtubule (GO:0072386)	1/6	0.147798	1	6.33714	KIF13A	.
	positive regulation of cardiac muscle contraction (GO:0060452)	1/6	0.147798	1	6.33714	TRPM4	.
	regulation of interleukin-10 secretion (GO:2001179)	1/6	0.147798	1	6.33714	PRKCZ	.
	positive regulation of sodium ion transmembrane transport (GO:1902307)	1/6	0.147798	1	6.33714	ANK3	.
	heart trabecula formation (GO:0060347)	1/6	0.147798	1	6.33714	TGFBR3	.
	positive regulation of keratinocyte migration (GO:0051549)	1/6	0.147798	1	6.33714	EPB41L4B	.
	cellular response to magnesium ion (GO:0071286)	1/6	0.147798	1	6.33714	ANK3	.
	negative regulation of delayed rectifier potassium channel activity (GO:1902260)	1/6	0.147798	1	6.33714	ANK3	.
	response to catecholamine (GO:0071869)	1/6	0.147798	1	6.33714	ADCY6	.
	endosome to lysosome transport via multivesicular body sorting pathway (GO:0032510)	1/6	0.147798	1	6.33714	LYST	.
	regulation of extracellular exosome assembly (GO:1903551)	1/6	0.147798	1	6.33714	SDC1	.
	negative regulation of cell cycle phase transition (GO:1901988)	1/6	0.147798	1	6.33714	ATF5	.
	regulation of cytokine production involved in immune response (GO:0002718)	1/6	0.147798	1	6.33714	TRPM4	.
	chondrocyte development (GO:0002063)	1/6	0.147798	1	6.33714	SULF2	.
	long term synaptic depression (GO:0060292)	1/6	0.147798	1	6.33714	PLK2	.
	single strand break repair (GO:0000012)	1/6	0.147798	1	6.33714	LIG4	.
	glucocorticoid receptor signaling pathway (GO:0042921)	1/6	0.147798	1	6.33714	YWHAH	.
	positive regulation of aspartic-type endopeptidase activity involved in amyloid precursor protein catabolic process (GO:1902961)	1/6	0.147798	1	6.33714	EFNA1	.
	dendritic spine maintenance (GO:0097062)	1/6	0.147798	1	6.33714	FYN	.
	fructose 6-phosphate metabolic process (GO:0006002)	1/6	0.147798	1	6.33714	GFPT2	.
	positive regulation of cyclin-dependent protein kinase activity (GO:1904031)	2/26	0.148622	1	2.92483	CCND1;CCNYL1	.
	bile acid biosynthetic process (GO:0006699)	2/26	0.148622	1	2.92483	OSBPL6;OSBPL3	.
	regulation of centrosome cycle (GO:0046605)	2/26	0.148622	1	2.92483	CHMP4C;ATF5	.
	regulation of p38MAPK cascade (GO:1900744)	2/26	0.148622	1	2.92483	BMP2;EZR	.
	regulation of supramolecular fiber organization (GO:1902903)	2/26	0.148622	1	2.92483	CAMSAP3;ARHGAP35	.
	regulation of muscle contraction (GO:0006937)	2/26	0.148622	1	2.92483	CAV1;PLCE1	.
	regulation of inflammatory response (GO:0050727)	7/166	0.148622	1	1.60337	ACOD1;OTUD7B;GATA3;GGT1;ETS1;SELE;CX3CL1	.
	peptidyl-tyrosine modification (GO:0018212)	3/51	0.150198	1	2.23664	FYN;EPHA1;FGFR1	.
	regulation of exocytosis (GO:0017157)	3/51	0.150198	1	2.23664	SYT1;RAB13;RAB27B	.
	positive regulation of actin filament polymerization (GO:0030838)	3/51	0.150198	1	2.23664	BAIAP2L1;CDC42EP3;PFN2	.
	regulation of response to external stimulus (GO:0032101)	5/107	0.151515	1	1.77677	CAV1;OTUD7B;F2RL1;GGT1;SELE	.
	regulation of protein secretion (GO:0050708)	5/107	0.151515	1	1.77677	UNC13B;TGFB2;ITPR1;EZR;MYH10	.
	neuron projection development (GO:0031175)	7/167	0.151868	1	1.59377	DBNDD2;RAB13;PLXNB1;STX3;NYAP2;L1CAM;DCLK1	.
	positive regulation of ossification (GO:0045778)	3/52	0.156482	1	2.19362	TFAP2A;TGFB2;BMP2	.
	regulation of cell-matrix adhesion (GO:0001952)	3/52	0.156482	1	2.19362	CAMSAP3;JUP;EPHA1	.
	plasma membrane bounded cell projection morphogenesis (GO:0120039)	3/52	0.156482	1	2.19362	PLXNB1;NYAP2;DCLK1	.
	positive regulation of cell-substrate adhesion (GO:0010811)	3/52	0.156482	1	2.19362	DOCK5;JUP;EPHA1	.
	apoptotic process (GO:0006915)	9/231	0.156699	1	1.48141	CYFIP2;ERBB3;DAPK1;CASP6;MAGI3;KREMEN1;PAWR;PAK6;LIG4	.
	regulation of vesicle-mediated transport (GO:0060627)	6/138	0.156711	1	1.65317	RAB4A;SYT1;RAB25;RAB13;BMP2K;PACSIN3	.
	regulation of calcium ion transmembrane transporter activity (GO:1901019)	2/27	0.157861	1	2.8165	AHNAK;JPH1	.
	negative regulation of peptidyl-tyrosine phosphorylation (GO:0050732)	2/27	0.157861	1	2.8165	CAV1;PRKCZ	.
	leukocyte cell-cell adhesion (GO:0007159)	2/27	0.157861	1	2.8165	EZR;SELE	.
	negative regulation of microtubule polymerization or depolymerization (GO:0031111)	2/27	0.157861	1	2.8165	CAMSAP3;TUBB4A	.
	cardiac muscle cell development (GO:0055013)	2/27	0.157861	1	2.8165	CXADR;SORBS2	.
	negative regulation of osteoblast differentiation (GO:0045668)	2/27	0.157861	1	2.8165	AXIN2;TRPM4	.
	regulation of blood vessel diameter (GO:0097746)	2/27	0.157861	1	2.8165	F2RL1;ADCY6	.
	cellular response to glucose stimulus (GO:0071333)	2/27	0.157861	1	2.8165	UNC13B;MLXIPL	.
	Wnt signaling pathway (GO:0016055)	5/109	0.159906	1	1.74417	TCF7;DIXDC1;AXIN2;CD24;FERMT2	.
	regulation of Wnt signaling pathway (GO:0030111)	5/109	0.159906	1	1.74417	BMP2;ITGA3;GRB10;KREMEN1;SULF2	.
	regulation of cell growth (GO:0001558)	8/201	0.161246	1	1.51335	TGFB2;SLC44A4;ERBB2;PLCE1;SH3BP4;AKAP6;APBB2;DCBLD2	.
	positive regulation of binding (GO:0051099)	4/81	0.164525	1	1.87767	BMP2;CAV1;TRIB3;MET	.
	positive regulation of protein catabolic process (GO:0045732)	4/81	0.164525	1	1.87767	PLK2;PACSIN3;SNX9;EZR	.
	regulation of vasculature development (GO:1901342)	2/28	0.167203	1	2.71592	ERBB2;ETS1	.
	neuron projection extension (GO:1990138)	2/28	0.167203	1	2.71592	PLXNB1;SEMA3F	.
	chondrocyte differentiation (GO:0002062)	2/28	0.167203	1	2.71592	BMP2;SULF2	.
	regulation of transmembrane receptor protein serine/threonine kinase signaling pathway (GO:0090092)	2/28	0.167203	1	2.71592	ITGA3;DKK3	.
	regulation of fatty acid biosynthetic process (GO:0042304)	2/28	0.167203	1	2.71592	MLXIPL;TRIB3	.
	regulation of defense response to virus by virus (GO:0050690)	2/28	0.167203	1	2.71592	FYN;AP1M2	.
	protein K63-linked deubiquitination (GO:0070536)	2/28	0.167203	1	2.71592	OTUD7B;YOD1	.
	positive regulation of fibroblast proliferation (GO:0048146)	2/28	0.167203	1	2.71592	PDGFC;LIG4	.
	positive regulation of immune response (GO:0050778)	3/54	0.169288	1	2.11238	TGFB2;F2RL1;FCGR2B	.
	glycosphingolipid metabolic process (GO:0006687)	3/54	0.169288	1	2.11238	GLTP;ESYT3;A4GALT	.
	angiotensin-activated signaling pathway (GO:0038166)	1/7	0.170218	1	5.43183	CAV1	.
	substrate-dependent cell migration, cell extension (GO:0006930)	1/7	0.170218	1	5.43183	P2RY12	.
	protein localization to basolateral plasma membrane (GO:1903361)	1/7	0.170218	1	5.43183	CAV1	.
	phosphate ion transmembrane transport (GO:0035435)	1/7	0.170218	1	5.43183	SLC20A1	.
	regulation of entry of bacterium into host cell (GO:2000535)	1/7	0.170218	1	5.43183	CAV1	.
	tyrosine metabolic process (GO:0006570)	1/7	0.170218	1	5.43183	TAT	.
	progesterone receptor signaling pathway (GO:0050847)	1/7	0.170218	1	5.43183	YAP1	.
	negative regulation of keratinocyte proliferation (GO:0010839)	1/7	0.170218	1	5.43183	PTPRK	.
	AV node cell action potential (GO:0086016)	1/7	0.170218	1	5.43183	TRPM4	.
	cellular response to interferon-alpha (GO:0035457)	1/7	0.170218	1	5.43183	GATA3	.
	positive regulation of calcineurin-NFAT signaling cascade (GO:0070886)	1/7	0.170218	1	5.43183	AKAP6	.
	fatty acid elongation, unsaturated fatty acid (GO:0019368)	1/7	0.170218	1	5.43183	ELOVL6	.
	regulation of extracellular matrix organization (GO:1903053)	1/7	0.170218	1	5.43183	DDR1	.
	hemostasis (GO:0007599)	1/7	0.170218	1	5.43183	P2RY12	.
	positive regulation of histone H3-K9 methylation (GO:0051574)	1/7	0.170218	1	5.43183	ZNF304	.
	ornithine transport (GO:0015822)	1/7	0.170218	1	5.43183	SLC7A1	.
	mitral valve development (GO:0003174)	1/7	0.170218	1	5.43183	EFNA1	.
	regulation of endothelial cell chemotaxis to fibroblast growth factor (GO:2000544)	1/7	0.170218	1	5.43183	FGFR1	.
	pri-miRNA transcription from RNA polymerase II promoter (GO:0061614)	1/7	0.170218	1	5.43183	ETS1	.
	protein localization to ciliary membrane (GO:1903441)	1/7	0.170218	1	5.43183	TULP3	.
	vesicle transport along actin filament (GO:0030050)	1/7	0.170218	1	5.43183	FNBP1L	.
	regulation of tube diameter (GO:0035296)	1/7	0.170218	1	5.43183	ADCY6	.
	reproductive system development (GO:0061458)	1/7	0.170218	1	5.43183	TBX3	.
	retrograde axonal transport (GO:0008090)	1/7	0.170218	1	5.43183	DST	.
	negative regulation of cardiac muscle cell differentiation (GO:2000726)	1/7	0.170218	1	5.43183	BMP2	.
	nuclear body organization (GO:0030575)	1/7	0.170218	1	5.43183	ETS1	.
	negative regulation of osteoblast proliferation (GO:0033689)	1/7	0.170218	1	5.43183	PLXNB1	.
	L-alanine transport (GO:0015808)	1/7	0.170218	1	5.43183	SLC1A4	.
	central nervous system neuron axonogenesis (GO:0021955)	1/7	0.170218	1	5.43183	ARHGAP35	.
	gas homeostasis (GO:0033483)	1/7	0.170218	1	5.43183	CAV1	.
	fatty acid elongation, saturated fatty acid (GO:0019367)	1/7	0.170218	1	5.43183	ELOVL6	.
	fatty acid elongation, polyunsaturated fatty acid (GO:0034626)	1/7	0.170218	1	5.43183	ELOVL6	.
	L-cysteine metabolic process (GO:0046439)	1/7	0.170218	1	5.43183	CBS	.
	norepinephrine biosynthetic process (GO:0042421)	1/7	0.170218	1	5.43183	GATA3	.
	positive regulation of ER-associated ubiquitin-dependent protein catabolic process (GO:1903071)	1/7	0.170218	1	5.43183	CAV1	.
	determination of digestive tract left/right asymmetry (GO:0071907)	1/7	0.170218	1	5.43183	CCDC39	.
	morphogenesis of a polarized epithelium (GO:0001738)	1/7	0.170218	1	5.43183	CELSR1	.
	vascular endothelial growth factor signaling pathway (GO:0038084)	1/7	0.170218	1	5.43183	GAB1	.
	regulation of high voltage-gated calcium channel activity (GO:1901841)	1/7	0.170218	1	5.43183	NOS1AP	.
	negative regulation of nitric oxide metabolic process (GO:1904406)	1/7	0.170218	1	5.43183	CAV1	.
	negative regulation of macrophage activation (GO:0043031)	1/7	0.170218	1	5.43183	FCGR2B	.
	regulation of alpha-beta T cell differentiation (GO:0046637)	1/7	0.170218	1	5.43183	PNP	.
	negative regulation of cardiocyte differentiation (GO:1905208)	1/7	0.170218	1	5.43183	BMP2	.
	regulation of dendritic cell differentiation (GO:2001198)	1/7	0.170218	1	5.43183	FCGR2B	.
	positive regulation of fatty acid beta-oxidation (GO:0032000)	1/7	0.170218	1	5.43183	IRS1	.
	female genitalia development (GO:0030540)	1/7	0.170218	1	5.43183	TBX3	.
	V(D)J recombination (GO:0033151)	1/7	0.170218	1	5.43183	LIG4	.
	positive regulation of cell migration by vascular endothelial growth factor signaling pathway (GO:0038089)	1/7	0.170218	1	5.43183	GAB1	.
	pharyngeal arch artery morphogenesis (GO:0061626)	1/7	0.170218	1	5.43183	TGFB2	.
	fatty acid elongation, monounsaturated fatty acid (GO:0034625)	1/7	0.170218	1	5.43183	ELOVL6	.
	proline metabolic process (GO:0006560)	1/7	0.170218	1	5.43183	PYCR1	.
	negative regulation of nitric oxide biosynthetic process (GO:0045019)	1/7	0.170218	1	5.43183	CAV1	.
	regulation of cell-cell adhesion mediated by integrin (GO:0033632)	1/7	0.170218	1	5.43183	PODXL	.
	cellular response to platelet-derived growth factor stimulus (GO:0036120)	1/7	0.170218	1	5.43183	MARS	.
	negative regulation of glycoprotein biosynthetic process (GO:0010561)	1/7	0.170218	1	5.43183	BACE2	.
	regulation of cell projection organization (GO:0031344)	1/7	0.170218	1	5.43183	PROM2	.
	cleavage furrow formation (GO:0036089)	1/7	0.170218	1	5.43183	SNX9	.
	negative regulation of cardiac muscle tissue development (GO:0055026)	1/7	0.170218	1	5.43183	BMP2	.
	amino acid import across plasma membrane (GO:0089718)	1/7	0.170218	1	5.43183	SLC7A1	.
	myoblast fusion (GO:0007520)	1/7	0.170218	1	5.43183	CACNA1H	.
	store-operated calcium entry (GO:0002115)	1/7	0.170218	1	5.43183	CRACR2A	.
	negative regulation of dendrite development (GO:2000171)	1/7	0.170218	1	5.43183	YWHAH	.
	membrane invagination (GO:0010324)	1/7	0.170218	1	5.43183	FNBP1L	.
	positive regulation of neurological system process (GO:0031646)	1/7	0.170218	1	5.43183	PARD3	.
	negative regulation of Wnt signaling pathway (GO:0030178)	7/174	0.175484	1	1.52965	BMP2;CAV1;GRB10;KREMEN1;AXIN2;PRICKLE1;DKK3	.
	regulation of cellular catabolic process (GO:0031329)	3/55	0.175802	1	2.07397	DAPK1;ITPR1;PIP4K2C	.
	regulation of RNA splicing (GO:0043484)	3/55	0.175802	1	2.07397	AHNAK;ESRP2;ESRP1	.
	collagen fibril organization (GO:0030199)	2/29	0.176638	1	2.62226	TGFB2;LOXL4	.
	lung development (GO:0030324)	2/29	0.176638	1	2.62226	CCDC39;ITGA3	.
	regulation of vasoconstriction (GO:0019229)	2/29	0.176638	1	2.62226	CAV1;TRPM4	.
	negative regulation of Notch signaling pathway (GO:0045746)	2/29	0.176638	1	2.62226	CHAC1;PEAR1	.
	regulation of embryonic development (GO:0045995)	2/29	0.176638	1	2.62226	RNF207;PHLDB2	.
	negative regulation of lymphocyte proliferation (GO:0050672)	2/29	0.176638	1	2.62226	DLG5;FCGR2B	.
	respiratory system development (GO:0060541)	2/29	0.176638	1	2.62226	CCDC39;ITGA3	.
	regulation of cellular biosynthetic process (GO:0031326)	2/29	0.176638	1	2.62226	NOS1AP;GATA3	.
	neuron development (GO:0048666)	6/144	0.179493	1	1.58428	TGFB2;DBNDD2;SLC44A4;RAB13;STX3;L1CAM	.
	glycosaminoglycan catabolic process (GO:0006027)	3/56	0.182384	1	2.03694	SDC1;HSPG2;DCN	.
	regulation of transcription, DNA-templated (GO:0006355)	48/1598	0.184942	1	1.14211	CDKN1C;YAP1;FOXA1;EHF;CASZ1;CRABP2;EPAS1;PERM1;TCF7;FHL2;TULP3;HR;BAZ2B;GATA3;PTPRK;PRICKLE1;ETS1;ARHGAP35;CDH1;ERBB2;PAK6;ZNF304;APBB2;MTA3;TEAD3;YWHAH;ZNF584;IVNS1ABP;TFAP2A;AFAP1L2;RFX2;GRHL3;SMARCA1;GRHL1;TBX3;DKK3;MLXIPL;BMP2;ZEB1;ELF3;IRF4;JMY;ZNF436;TRIB3;IRF6;ATF5;RCOR3;CREB5	.
	positive regulation of MAP kinase activity (GO:0043406)	7/177	0.186062	1	1.50373	BMP2;PDGFC;ERBB2;PLCE1;CD24;ARHGEF5;FGFR1	.
	regulation of actin cytoskeleton reorganization (GO:2000249)	2/30	0.186152	1	2.53485	BAIAP2L1;F11R	.
	regulation of protein insertion into mitochondrial membrane involved in apoptotic signaling pathway (GO:1900739)	2/30	0.186152	1	2.53485	TP53BP2;YWHAH	.
	negative regulation of stress-activated MAPK cascade (GO:0032873)	2/30	0.186152	1	2.53485	F2RL1;EZR	.
	positive regulation of cyclin-dependent protein serine/threonine kinase activity (GO:0045737)	2/30	0.186152	1	2.53485	CCND1;CCNYL1	.
	cellular response to cAMP (GO:0071320)	2/30	0.186152	1	2.53485	AKAP6;EZR	.
	regulation of cell adhesion mediated by integrin (GO:0033628)	2/30	0.186152	1	2.53485	EFNA1;TGFB2	.
	positive regulation of cation channel activity (GO:2001259)	2/30	0.186152	1	2.53485	AKAP6;ANK3	.
	regulation of intracellular estrogen receptor signaling pathway (GO:0033146)	2/30	0.186152	1	2.53485	YAP1;FOXA1	.
	positive regulation of phospholipase C activity (GO:0010863)	2/30	0.186152	1	2.53485	SELE;FGFR1	.
	positive regulation of protein insertion into mitochondrial membrane involved in apoptotic signaling pathway (GO:1900740)	2/30	0.186152	1	2.53485	TP53BP2;YWHAH	.
	ATP-dependent chromatin remodeling (GO:0043044)	2/30	0.186152	1	2.53485	CECR2;SMARCA1	.
	regulation of blood coagulation (GO:0030193)	2/30	0.186152	1	2.53485	CAV1;F2RL1	.
	bile acid metabolic process (GO:0008206)	2/30	0.186152	1	2.53485	OSBPL6;OSBPL3	.
	negative regulation of cell morphogenesis involved in differentiation (GO:0010771)	2/30	0.186152	1	2.53485	TACSTD2;YWHAH	.
	positive regulation of cell death (GO:0010942)	3/57	0.189031	1	2.0012	FYN;AXIN2;FCGR2B	.
	negative regulation of programmed cell death (GO:0043069)	14/408	0.18961	1	1.3047	DDR1;TFAP2A;PLK2;FHL2;ASNS;TBX3;KRT18;ERBB3;ERBB2;ATF5;EPHA1;CRYAB;MET;FGFR1	.
	regulation of peptidyl-serine phosphorylation (GO:0033135)	4/86	0.190595	1	1.7685	MLXIPL;RASSF2;CAV1;PFN2	.
	regulation of vascular associated smooth muscle cell migration (GO:1904752)	1/8	0.192049	1	4.75285	DOCK5	.
	neuron projection extension involved in neuron projection guidance (GO:1902284)	1/8	0.192049	1	4.75285	SEMA3F	.
	positive regulation of extracellular matrix assembly (GO:1901203)	1/8	0.192049	1	4.75285	PHLDB2	.
	regulation of calcium ion transmembrane transport via high voltage-gated calcium channel (GO:1902514)	1/8	0.192049	1	4.75285	NOS1AP	.
	cellular response to prostaglandin E stimulus (GO:0071380)	1/8	0.192049	1	4.75285	ADCY6	.
	sulfur amino acid catabolic process (GO:0000098)	1/8	0.192049	1	4.75285	CBS	.
	positive regulation of membrane potential (GO:0045838)	1/8	0.192049	1	4.75285	ANK3	.
	negative regulation of protein homooligomerization (GO:0032463)	1/8	0.192049	1	4.75285	CRYAB	.
	response to magnesium ion (GO:0032026)	1/8	0.192049	1	4.75285	ANK3	.
	glomerular visceral epithelial cell development (GO:0072015)	1/8	0.192049	1	4.75285	PODXL	.
	negative regulation of leukocyte mediated cytotoxicity (GO:0001911)	1/8	0.192049	1	4.75285	FCGR2B	.
	establishment of integrated proviral latency (GO:0075713)	1/8	0.192049	1	4.75285	LIG4	.
	galactose catabolic process (GO:0019388)	1/8	0.192049	1	4.75285	PGM5	.
	T-helper 17 cell differentiation (GO:0072539)	1/8	0.192049	1	4.75285	IRF4	.
	negative regulation of toll-like receptor 4 signaling pathway (GO:0034144)	1/8	0.192049	1	4.75285	ACOD1	.
	microvillus organization (GO:0032528)	1/8	0.192049	1	4.75285	EZR	.
	cytoskeletal anchoring at nuclear membrane (GO:0090286)	1/8	0.192049	1	4.75285	SYNE1	.
	lagging strand elongation (GO:0006273)	1/8	0.192049	1	4.75285	LIG4	.
	positive regulation of alpha-beta T cell differentiation (GO:0046638)	1/8	0.192049	1	4.75285	PNP	.
	coronary vasculature morphogenesis (GO:0060977)	1/8	0.192049	1	4.75285	TGFBR3	.
	regulation of microvillus organization (GO:0032530)	1/8	0.192049	1	4.75285	PODXL	.
	negative regulation of glucose import (GO:0046325)	1/8	0.192049	1	4.75285	GRB10	.
	regulation of T cell mediated immunity (GO:0002709)	1/8	0.192049	1	4.75285	TRPM4	.
	microvillus assembly (GO:0030033)	1/8	0.192049	1	4.75285	EZR	.
	transepithelial transport (GO:0070633)	1/8	0.192049	1	4.75285	CXADR	.
	protein localization to microtubule (GO:0035372)	1/8	0.192049	1	4.75285	MID1	.
	positive regulation of early endosome to late endosome transport (GO:2000643)	1/8	0.192049	1	4.75285	EZR	.
	axon extension involved in axon guidance (GO:0048846)	1/8	0.192049	1	4.75285	SEMA3F	.
	desensitization of G-protein coupled receptor protein signaling pathway (GO:0002029)	1/8	0.192049	1	4.75285	LY6G6E	.
	positive regulation of ryanodine-sensitive calcium-release channel activity (GO:0060316)	1/8	0.192049	1	4.75285	AKAP6	.
	T-helper cell lineage commitment (GO:0002295)	1/8	0.192049	1	4.75285	IRF4	.
	regulation of positive chemotaxis (GO:0050926)	1/8	0.192049	1	4.75285	F2RL1	.
	positive regulation of protein localization to cell surface (GO:2000010)	1/8	0.192049	1	4.75285	STX3	.
	genetic imprinting (GO:0071514)	1/8	0.192049	1	4.75285	ZFP57	.
	cell junction maintenance (GO:0034331)	1/8	0.192049	1	4.75285	F2RL1	.
	regulation of chemokine secretion (GO:0090196)	1/8	0.192049	1	4.75285	F2RL1	.
	protein localization to microtubule cytoskeleton (GO:0072698)	1/8	0.192049	1	4.75285	MID1	.
	ketone biosynthetic process (GO:0042181)	1/8	0.192049	1	4.75285	CACNA1H	.
	regulation of aspartic-type endopeptidase activity involved in amyloid precursor protein catabolic process (GO:1902959)	1/8	0.192049	1	4.75285	EFNA1	.
	B cell mediated immunity (GO:0019724)	1/8	0.192049	1	4.75285	FCGR2B	.
	regulation of nitrogen compound metabolic process (GO:0051171)	1/8	0.192049	1	4.75285	NOS1AP	.
	ketone body biosynthetic process (GO:0046951)	1/8	0.192049	1	4.75285	BDH1	.
	cellular biogenic amine catabolic process (GO:0042402)	1/8	0.192049	1	4.75285	SMOX	.
	ventricular trabecula myocardium morphogenesis (GO:0003222)	1/8	0.192049	1	4.75285	TGFB2	.
	positive regulation of interleukin-2 biosynthetic process (GO:0045086)	1/8	0.192049	1	4.75285	IRF4	.
	positive regulation of toll-like receptor 4 signaling pathway (GO:0034145)	1/8	0.192049	1	4.75285	F2RL1	.
	glomerular epithelial cell development (GO:0072310)	1/8	0.192049	1	4.75285	PODXL	.
	response to hydroperoxide (GO:0033194)	1/8	0.192049	1	4.75285	DAPK1	.
	actin filament network formation (GO:0051639)	1/8	0.192049	1	4.75285	PLS3	.
	calcium ion import into cytosol (GO:1902656)	1/8	0.192049	1	4.75285	TRPV6	.
	norepinephrine metabolic process (GO:0042415)	1/8	0.192049	1	4.75285	GATA3	.
	regulation of dendritic cell antigen processing and presentation (GO:0002604)	1/8	0.192049	1	4.75285	FCGR2B	.
	regulation of T-helper 2 cell differentiation (GO:0045628)	1/8	0.192049	1	4.75285	PRKCZ	.
	regulation of amyloid fibril formation (GO:1905906)	1/8	0.192049	1	4.75285	CRYAB	.
	regulation of cilium movement (GO:0003352)	1/8	0.192049	1	4.75285	CCDC39	.
	positive regulation of chromatin silencing (GO:0031937)	1/8	0.192049	1	4.75285	ZNF304	.
	positive regulation of viral entry into host cell (GO:0046598)	1/8	0.192049	1	4.75285	TMPRSS2	.
	positive regulation of protein homodimerization activity (GO:0090073)	1/8	0.192049	1	4.75285	TRAF4	.
	mammary gland epithelial cell differentiation (GO:0060644)	1/8	0.192049	1	4.75285	IRF6	.
	calcium ion import across plasma membrane (GO:0098703)	1/8	0.192049	1	4.75285	TRPV6	.
	aldehyde biosynthetic process (GO:0046184)	1/8	0.192049	1	4.75285	CACNA1H	.
	response to leptin (GO:0044321)	1/8	0.192049	1	4.75285	CCND1	.
	interleukin-1 beta secretion (GO:0050702)	1/8	0.192049	1	4.75285	F2RL1	.
	regulation of T-helper 2 cell cytokine production (GO:2000551)	1/8	0.192049	1	4.75285	PRKCZ	.
	regulation of keratinocyte migration (GO:0051547)	1/8	0.192049	1	4.75285	EPB41L4B	.
	regulation of receptor binding (GO:1900120)	1/8	0.192049	1	4.75285	PTPRF	.
	tRNA aminoacylation for mitochondrial protein translation (GO:0070127)	1/8	0.192049	1	4.75285	GARS	.
	regulation of cardiac muscle cell action potential involved in regulation of contraction (GO:0098909)	1/8	0.192049	1	4.75285	CAV1	.
	negative regulation of cellular macromolecule biosynthetic process (GO:2000113)	17/512	0.194369	1	1.26248	CDKN1C;TFAP2A;GRB7;DAPK1;GATA3;PTPRK;PRICKLE1;TBX3;ARHGAP35;DKK3;MLXIPL;BMP2;ZEB1;ELF3;TRIB3;ATF5;MTA3	.
	negative regulation of nucleic acid-templated transcription (GO:1903507)	15/444	0.194656	1	1.28455	CDKN1C;TFAP2A;GATA3;PTPRK;PRICKLE1;TBX3;ARHGAP35;DKK3;MLXIPL;BMP2;ZEB1;ELF3;TRIB3;ATF5;MTA3	.
	negative regulation of canonical Wnt signaling pathway (GO:0090090)	6/148	0.195377	1	1.54147	BMP2;CAV1;KREMEN1;AXIN2;PRICKLE1;DKK3	.
	negative regulation of toll-like receptor signaling pathway (GO:0034122)	2/31	0.195737	1	2.45308	ACOD1;F2RL1	.
	regulation of dendritic spine development (GO:0060998)	2/31	0.195737	1	2.45308	DLG5;LZTS3	.
	alpha-amino acid metabolic process (GO:1901605)	2/31	0.195737	1	2.45308	CBS;CKMT1A	.
	regulation of glucose import (GO:0046324)	2/31	0.195737	1	2.45308	IRS1;GRB10	.
	renal water homeostasis (GO:0003091)	2/31	0.195737	1	2.45308	MYO5B;ADCY6	.
	skeletal system morphogenesis (GO:0048705)	2/31	0.195737	1	2.45308	TFAP2A;FGFR1	.
	termination of RNA polymerase I transcription (GO:0006363)	2/31	0.195737	1	2.45308	TAF1B;CAVIN1	.
	positive regulation of bone mineralization (GO:0030501)	2/31	0.195737	1	2.45308	TFAP2A;BMP2	.
	cholesterol homeostasis (GO:0042632)	3/58	0.195739	1	1.9667	CAV1;MALL;CD24	.
	sterol homeostasis (GO:0055092)	3/58	0.195739	1	1.9667	CAV1;MALL;CD24	.
	sodium ion transport (GO:0006814)	3/58	0.195739	1	1.9667	SCNN1A;KCNK1;SLC9B2	.
	T cell activation (GO:0042110)	4/88	0.20137	1	1.72831	CXADR;IRF4;F2RL1;FYN	.
	keratinocyte differentiation (GO:0030216)	3/59	0.202504	1	1.93336	DSP;SCEL;EVPL	.
	regulation of neuron projection development (GO:0010975)	5/119	0.204456	1	1.5976	NDRG4;DPYSL3;ARHGAP35;CX3CL1;ADCY6	.
	positive regulation of calcium ion transport into cytosol (GO:0010524)	2/32	0.205381	1	2.37643	CAV1;AKAP6	.
	cellular response to amino acid stimulus (GO:0071230)	2/32	0.205381	1	2.37643	SH3BP4;FYN	.
	positive regulation of dendrite development (GO:1900006)	2/32	0.205381	1	2.37643	DLG5;VLDLR	.
	negative regulation of receptor activity (GO:2000272)	2/32	0.205381	1	2.37643	CAV1;CBLC	.
	negative regulation of fat cell differentiation (GO:0045599)	2/32	0.205381	1	2.37643	TRIB3;GATA3	.
	positive regulation of T cell differentiation (GO:0045582)	2/32	0.205381	1	2.37643	PNP;GATA3	.
	regulation of nitric oxide biosynthetic process (GO:0045428)	2/32	0.205381	1	2.37643	CAV1;NOS1AP	.
	aminoglycan catabolic process (GO:0006026)	2/32	0.205381	1	2.37643	SDC1;HSPG2	.
	vasculogenesis (GO:0001570)	2/32	0.205381	1	2.37643	TGFBR3;CAV1	.
	cell chemotaxis (GO:0060326)	3/60	0.209323	1	1.90114	ARHGEF16;RAB13;PARVA	.
	regulation of JNK cascade (GO:0046328)	4/90	0.212322	1	1.6899	RASSF2;TRAF4;F2RL1;FCGR2B	.
	secretory granule organization (GO:0033363)	1/9	0.213306	1	4.22476	LYST	.
	positive regulation of transcription of nuclear large rRNA transcript from RNA polymerase I promoter (GO:1901838)	1/9	0.213306	1	4.22476	MARS	.
	alanine transport (GO:0032328)	1/9	0.213306	1	4.22476	SLC1A4	.
	negative regulation of phagocytosis (GO:0050765)	1/9	0.213306	1	4.22476	FCGR2B	.
	regulation of macrophage cytokine production (GO:0010935)	1/9	0.213306	1	4.22476	TGFB2	.
	negative regulation of response to reactive oxygen species (GO:1901032)	1/9	0.213306	1	4.22476	PYCR1	.
	regulation of organ growth (GO:0046620)	1/9	0.213306	1	4.22476	WWC1	.
	regulation of amyloid precursor protein biosynthetic process (GO:0042984)	1/9	0.213306	1	4.22476	BACE2	.
	long-chain fatty acid biosynthetic process (GO:0042759)	1/9	0.213306	1	4.22476	ELOVL6	.
	pericardium development (GO:0060039)	1/9	0.213306	1	4.22476	BMP2	.
	negative regulation of mitotic nuclear division (GO:0045839)	1/9	0.213306	1	4.22476	TOM1L1	.
	negative regulation of catenin import into nucleus (GO:0035414)	1/9	0.213306	1	4.22476	AXIN2	.
	regulation of ER-associated ubiquitin-dependent protein catabolic process (GO:1903069)	1/9	0.213306	1	4.22476	CAV1	.
	regulation of endothelial cell differentiation (GO:0045601)	1/9	0.213306	1	4.22476	ZEB1	.
	mature B cell differentiation involved in immune response (GO:0002313)	1/9	0.213306	1	4.22476	FCGR2B	.
	homocysteine metabolic process (GO:0050667)	1/9	0.213306	1	4.22476	CBS	.
	positive regulation of synapse maturation (GO:0090129)	1/9	0.213306	1	4.22476	ADGRL1	.
	regulation of morphogenesis of an epithelium (GO:1905330)	1/9	0.213306	1	4.22476	RNF207	.
	regulation of cysteine-type endopeptidase activity involved in apoptotic signaling pathway (GO:2001267)	1/9	0.213306	1	4.22476	ST18	.
	Cdc42 protein signal transduction (GO:0032488)	1/9	0.213306	1	4.22476	RHOU	.
	interleukin-1 beta production (GO:0032611)	1/9	0.213306	1	4.22476	F2RL1	.
	somatic recombination of immunoglobulin genes involved in immune response (GO:0002204)	1/9	0.213306	1	4.22476	LIG4	.
	regulation of integrin activation (GO:0033623)	1/9	0.213306	1	4.22476	FBLIM1	.
	central nervous system neuron development (GO:0021954)	1/9	0.213306	1	4.22476	ARHGAP35	.
	semaphorin-plexin signaling pathway involved in axon guidance (GO:1902287)	1/9	0.213306	1	4.22476	PLXNB1	.
	establishment of viral latency (GO:0019043)	1/9	0.213306	1	4.22476	LIG4	.
	epithelial cilium movement involved in determination of left/right asymmetry (GO:0060287)	1/9	0.213306	1	4.22476	CCDC39	.
	nicotinamide nucleotide biosynthetic process (GO:0019359)	1/9	0.213306	1	4.22476	ME1	.
	response to muramyl dipeptide (GO:0032495)	1/9	0.213306	1	4.22476	ERBIN	.
	positive regulation of astrocyte differentiation (GO:0048711)	1/9	0.213306	1	4.22476	BMP2	.
	interleukin-1 secretion (GO:0050701)	1/9	0.213306	1	4.22476	F2RL1	.
	sympathetic ganglion development (GO:0061549)	1/9	0.213306	1	4.22476	SEMA3F	.
	positive regulation of autophagosome assembly (GO:2000786)	1/9	0.213306	1	4.22476	PIP4K2C	.
	regulation of cytokine secretion involved in immune response (GO:0002739)	1/9	0.213306	1	4.22476	F2RL1	.
	protein localization to vacuole (GO:0072665)	1/9	0.213306	1	4.22476	SH3BP4	.
	regulation of striated muscle tissue development (GO:0016202)	1/9	0.213306	1	4.22476	MEGF10	.
	podosome assembly (GO:0071800)	1/9	0.213306	1	4.22476	SH3PXD2A	.
	production of siRNA involved in RNA interference (GO:0030422)	1/9	0.213306	1	4.22476	PRKRA	.
	engulfment of apoptotic cell (GO:0043652)	1/9	0.213306	1	4.22476	MEGF10	.
	regulation of methylation-dependent chromatin silencing (GO:0090308)	1/9	0.213306	1	4.22476	ZNF304	.
	endothelial cell chemotaxis (GO:0035767)	1/9	0.213306	1	4.22476	RAB13	.
	positive regulation of myeloid leukocyte mediated immunity (GO:0002888)	1/9	0.213306	1	4.22476	F2RL1	.
	protein autoprocessing (GO:0016540)	1/9	0.213306	1	4.22476	TMPRSS2	.
	granulocyte activation (GO:0036230)	1/9	0.213306	1	4.22476	F2RL1	.
	hexose catabolic process (GO:0019320)	1/9	0.213306	1	4.22476	PGM5	.
	regulation of oxidative phosphorylation (GO:0002082)	1/9	0.213306	1	4.22476	MLXIPL	.
	B cell homeostasis (GO:0001782)	1/9	0.213306	1	4.22476	GAPT	.
	regulation of cell communication by electrical coupling involved in cardiac conduction (GO:1901844)	1/9	0.213306	1	4.22476	CAV1	.
	regulation of homotypic cell-cell adhesion (GO:0034110)	1/9	0.213306	1	4.22476	ANK3	.
	mitral valve morphogenesis (GO:0003183)	1/9	0.213306	1	4.22476	EFNA1	.
	proline transport (GO:0015824)	1/9	0.213306	1	4.22476	SLC1A4	.
	positive regulation of protein homooligomerization (GO:0032464)	1/9	0.213306	1	4.22476	RHOC	.
	negative regulation of transcription by competitive promoter binding (GO:0010944)	1/9	0.213306	1	4.22476	TFAP2A	.
	positive regulation of vascular endothelial cell proliferation (GO:1905564)	1/9	0.213306	1	4.22476	FGFR1	.
	negative regulation of potassium ion transmembrane transport (GO:1901380)	1/9	0.213306	1	4.22476	CAV1	.
	negative regulation of microtubule polymerization (GO:0031115)	1/9	0.213306	1	4.22476	TUBB4A	.
	fatty acid homeostasis (GO:0055089)	1/9	0.213306	1	4.22476	MLXIPL	.
	serine family amino acid catabolic process (GO:0009071)	1/9	0.213306	1	4.22476	CBS	.
	establishment of epithelial cell apical/basal polarity (GO:0045198)	1/9	0.213306	1	4.22476	CAMSAP3	.
	glycogen metabolic process (GO:0005977)	2/33	0.215076	1	2.30441	STBD1;PGM5	.
	entry into host cell (GO:0030260)	2/33	0.215076	1	2.30441	CDH1;MET	.
	stem cell differentiation (GO:0048863)	2/33	0.215076	1	2.30441	TGFB2;EPCAM	.
	positive regulation of calcium ion transport (GO:0051928)	2/33	0.215076	1	2.30441	CRACR2A;CAV1	.
	positive regulation of cell-matrix adhesion (GO:0001954)	2/33	0.215076	1	2.30441	JUP;EPHA1	.
	transcription initiation from RNA polymerase I promoter (GO:0006361)	2/33	0.215076	1	2.30441	TAF1B;CAVIN1	.
	positive regulation of biomineral tissue development (GO:0070169)	2/33	0.215076	1	2.30441	TFAP2A;BMP2	.
	transcription from RNA polymerase I promoter (GO:0006360)	2/33	0.215076	1	2.30441	TAF1B;CAVIN1	.
	glycosaminoglycan metabolic process (GO:0030203)	3/61	0.216192	1	1.86997	SDC1;HSPG2;DCN	.
	positive regulation of cellular protein metabolic process (GO:0032270)	4/91	0.21786	1	1.67133	CYFIP2;PERP;ERBB2;EZR	.
	inflammatory response (GO:0006954)	9/252	0.220454	1	1.35796	AFAP1L2;BMP2;CCL22;ELF3;F11R;FCGR2B;HSPG2;SELE;CX3CL1	.
	diterpenoid metabolic process (GO:0016101)	3/62	0.223107	1	1.83981	RDH11;SDC1;HSPG2	.
	second-messenger-mediated signaling (GO:0019932)	3/62	0.223107	1	1.83981	PLCE1;SELE;TRPM4	.
	cell cycle G1/S phase transition (GO:0044843)	4/92	0.223436	1	1.65317	WEE1;CCND1;PLK2;CDC7	.
	regulation of interleukin-8 production (GO:0032677)	2/34	0.22481	1	2.23664	AFAP1L2;OTUD7B	.
	positive regulation of exocytosis (GO:0045921)	2/34	0.22481	1	2.23664	SDC1;RAB27B	.
	negative regulation of T cell activation (GO:0050868)	2/34	0.22481	1	2.23664	DLG5;FCGR2B	.
	negative regulation of endothelial cell migration (GO:0010596)	2/34	0.22481	1	2.23664	JUP;DCN	.
	cellular macromolecular complex assembly (GO:0034622)	2/34	0.22481	1	2.23664	KIF13A;SNX9	.
	synapse assembly (GO:0007416)	3/63	0.230066	1	1.81061	FARP1;SDK1;CDH1	.
	negative regulation of neuron apoptotic process (GO:0043524)	3/63	0.230066	1	1.81061	NRBP2;ERBB3;LIG4	.
	protein complex assembly (GO:0006461)	7/189	0.230792	1	1.40825	BCL9;SH3PXD2A;AHNAK;TCF7;AXIN2;FERMT2;CX3CL1	.
	glomerular filtration (GO:0003094)	1/10	0.234006	1	3.80228	SULF2	.
	regulation of phospholipase C activity (GO:1900274)	1/10	0.234006	1	3.80228	FGFR1	.
	low-density lipoprotein particle receptor catabolic process (GO:0032802)	1/10	0.234006	1	3.80228	VLDLR	.
	regulation of synapse maturation (GO:0090128)	1/10	0.234006	1	3.80228	ADGRL1	.
	adrenal gland development (GO:0030325)	1/10	0.234006	1	3.80228	DKK3	.
	ganglion development (GO:0061548)	1/10	0.234006	1	3.80228	SEMA3F	.
	negative regulation of cellular protein catabolic process (GO:1903363)	1/10	0.234006	1	3.80228	EFNA1	.
	endothelium development (GO:0003158)	1/10	0.234006	1	3.80228	LAMA5	.
	positive regulation of transcription from RNA polymerase III promoter (GO:0045945)	1/10	0.234006	1	3.80228	ERBB2	.
	positive regulation of cytoplasmic transport (GO:1903651)	1/10	0.234006	1	3.80228	EZR	.
	regulation of mammary gland epithelial cell proliferation (GO:0033599)	1/10	0.234006	1	3.80228	GATA3	.
	regulation of actin filament length (GO:0030832)	1/10	0.234006	1	3.80228	ARHGAP35	.
	regulation of attachment of spindle microtubules to kinetochore (GO:0051988)	1/10	0.234006	1	3.80228	KNSTRN	.
	phosphatidylglycerol biosynthetic process (GO:0006655)	1/10	0.234006	1	3.80228	CDS1	.
	leukotriene D4 metabolic process (GO:1901748)	1/10	0.234006	1	3.80228	GGT1	.
	N-acetylneuraminate metabolic process (GO:0006054)	1/10	0.234006	1	3.80228	ST6GAL1	.
	positive regulation of amyloid-beta formation (GO:1902004)	1/10	0.234006	1	3.80228	EFNA1	.
	regulation of platelet-derived growth factor receptor signaling pathway (GO:0010640)	1/10	0.234006	1	3.80228	NDRG4	.
	mesoderm morphogenesis (GO:0048332)	1/10	0.234006	1	3.80228	TBX3	.
	galactose metabolic process (GO:0006012)	1/10	0.234006	1	3.80228	PGM5	.
	positive regulation of glucose import in response to insulin stimulus (GO:2001275)	1/10	0.234006	1	3.80228	IRS1	.
	glutamine metabolic process (GO:0006541)	1/10	0.234006	1	3.80228	ACOD1	.
	mesenchymal to epithelial transition (GO:0060231)	1/10	0.234006	1	3.80228	GATA3	.
	positive regulation of glial cell differentiation (GO:0045687)	1/10	0.234006	1	3.80228	BMP2	.
	regulation of protein exit from endoplasmic reticulum (GO:0070861)	1/10	0.234006	1	3.80228	TMEM30B	.
	positive regulation of acrosome reaction (GO:2000344)	1/10	0.234006	1	3.80228	CACNA1H	.
	regulation of transforming growth factor beta production (GO:0071634)	1/10	0.234006	1	3.80228	TGFB2	.
	positive regulation of cardiac muscle cell differentiation (GO:2000727)	1/10	0.234006	1	3.80228	AKAP6	.
	creatine metabolic process (GO:0006600)	1/10	0.234006	1	3.80228	CKMT1A	.
	mitotic G1 DNA damage checkpoint (GO:0031571)	1/10	0.234006	1	3.80228	CCND1	.
	positive regulation of fertilization (GO:1905516)	1/10	0.234006	1	3.80228	CACNA1H	.
	regulation of urine volume (GO:0035809)	1/10	0.234006	1	3.80228	ADCY6	.
	negative regulation of B cell proliferation (GO:0030889)	1/10	0.234006	1	3.80228	FCGR2B	.
	actin filament depolymerization (GO:0030042)	1/10	0.234006	1	3.80228	CFL2	.
	Rap protein signal transduction (GO:0032486)	1/10	0.234006	1	3.80228	PLK2	.
	G1 DNA damage checkpoint (GO:0044783)	1/10	0.234006	1	3.80228	CCND1	.
	cellular response to ATP (GO:0071318)	1/10	0.234006	1	3.80228	P2RY12	.
	regulation of fatty acid beta-oxidation (GO:0031998)	1/10	0.234006	1	3.80228	IRS1	.
	insulin-like growth factor receptor signaling pathway (GO:0048009)	1/10	0.234006	1	3.80228	IRS1	.
	cardiovascular system development (GO:0072358)	1/10	0.234006	1	3.80228	HSPG2	.
	positive regulation of protein exit from endoplasmic reticulum (GO:0070863)	1/10	0.234006	1	3.80228	TMEM30B	.
	negative regulation of protein maturation (GO:1903318)	1/10	0.234006	1	3.80228	CHAC1	.
	positive regulation of smooth muscle cell migration (GO:0014911)	1/10	0.234006	1	3.80228	DOCK5	.
	regulation of gene expression by genetic imprinting (GO:0006349)	1/10	0.234006	1	3.80228	ZFP57	.
	leukotriene D4 biosynthetic process (GO:1901750)	1/10	0.234006	1	3.80228	GGT1	.
	neuron projection fasciculation (GO:0106030)	1/10	0.234006	1	3.80228	ARHGAP35	.
	actin filament-based transport (GO:0099515)	1/10	0.234006	1	3.80228	FNBP1L	.
	polarized epithelial cell differentiation (GO:0030859)	1/10	0.234006	1	3.80228	CAMSAP3	.
	positive regulation of insulin secretion involved in cellular response to glucose stimulus (GO:0035774)	1/10	0.234006	1	3.80228	TRPM4	.
	regulation of phospholipase activity (GO:0010517)	1/10	0.234006	1	3.80228	FGFR1	.
	negative regulation of embryonic development (GO:0045992)	1/10	0.234006	1	3.80228	GATA3	.
	regulation of mitochondrial depolarization (GO:0051900)	1/10	0.234006	1	3.80228	DCN	.
	glucocorticoid metabolic process (GO:0008211)	1/10	0.234006	1	3.80228	YWHAH	.
	UV protection (GO:0009650)	1/10	0.234006	1	3.80228	SCARA3	.
	regulation of astrocyte differentiation (GO:0048710)	1/10	0.234006	1	3.80228	BMP2	.
	negative regulation of protein autophosphorylation (GO:0031953)	1/10	0.234006	1	3.80228	CAV1	.
	mitotic G1/S transition checkpoint (GO:0044819)	1/10	0.234006	1	3.80228	CCND1	.
	regulation of immunoglobulin production (GO:0002637)	1/10	0.234006	1	3.80228	FCGR2B	.
	positive regulation of execution phase of apoptosis (GO:1900119)	1/10	0.234006	1	3.80228	TP53BP2	.
	glucocorticoid biosynthetic process (GO:0006704)	1/10	0.234006	1	3.80228	CACNA1H	.
	positive regulation of vacuole organization (GO:0044090)	1/10	0.234006	1	3.80228	PIP4K2C	.
	ketone body metabolic process (GO:1902224)	1/10	0.234006	1	3.80228	BDH1	.
	pulmonary valve development (GO:0003177)	1/10	0.234006	1	3.80228	TGFB2	.
	negative regulation of glucose transport (GO:0010829)	1/10	0.234006	1	3.80228	GRB10	.
	positive regulation of type 2 immune response (GO:0002830)	1/10	0.234006	1	3.80228	PRKCZ	.
	endothelial cell migration (GO:0043542)	2/35	0.234577	1	2.17273	S100A2;RAB13	.
	regulation of mitotic spindle organization (GO:0060236)	2/35	0.234577	1	2.17273	CHMP4C;GNAI1	.
	flagellated sperm motility (GO:0030317)	2/35	0.234577	1	2.17273	CCDC39;SLC9B2	.
	proteolysis (GO:0006508)	10/291	0.238062	1	1.30663	BACE2;CAPN14;MMP15;CASP6;TMPRSS4;TMPRSS2;PLAT;CTSV;GGT1;WFDC2	.
	regulation of heart contraction (GO:0008016)	4/95	0.240378	1	1.60096	TGFB2;RNF207;ITPR1;CACNA1H	.
	muscle cell differentiation (GO:0042692)	2/36	0.244367	1	2.11238	MEGF10;SYNE1	.
	regulation of smoothened signaling pathway (GO:0008589)	2/36	0.244367	1	2.11238	DLG5;TULP3	.
	regulation of nitric-oxide synthase activity (GO:0050999)	2/36	0.244367	1	2.11238	CAV1;NOS1AP	.
	positive regulation of signaling (GO:0023056)	2/36	0.244367	1	2.11238	SYT1;GATA3	.
	sodium ion transmembrane transport (GO:0035725)	2/36	0.244367	1	2.11238	SCNN1A;KCNK1	.
	calcium ion transmembrane import into cytosol (GO:0097553)	2/36	0.244367	1	2.11238	TRPV6;ITPR1	.
	heart looping (GO:0001947)	2/36	0.244367	1	2.11238	CCDC39;NDRG4	.
	vesicle-mediated transport in synapse (GO:0099003)	2/36	0.244367	1	2.11238	UNC13B;SYT1	.
	regulation of cysteine-type endopeptidase activity (GO:2000116)	2/36	0.244367	1	2.11238	FYN;CST6	.
	isotype switching (GO:0045190)	1/11	0.254161	1	3.45662	LIG4	.
	L-phenylalanine metabolic process (GO:0006558)	1/11	0.254161	1	3.45662	TAT	.
	atrial septum morphogenesis (GO:0060413)	1/11	0.254161	1	3.45662	TGFB2	.
	L-phenylalanine catabolic process (GO:0006559)	1/11	0.254161	1	3.45662	TAT	.
	negative regulation of leukocyte activation (GO:0002695)	1/11	0.254161	1	3.45662	FCGR2B	.
	cellular response to prostaglandin stimulus (GO:0071379)	1/11	0.254161	1	3.45662	ADCY6	.
	negative regulation of protein localization to nucleus (GO:1900181)	1/11	0.254161	1	3.45662	OTUD7B	.
	positive regulation of superoxide anion generation (GO:0032930)	1/11	0.254161	1	3.45662	F2RL1	.
	negative regulation of nuclear division (GO:0051784)	1/11	0.254161	1	3.45662	TOM1L1	.
	immune response-regulating cell surface receptor signaling pathway (GO:0002768)	1/11	0.254161	1	3.45662	CD24	.
	regulation of hydrogen peroxide-induced cell death (GO:1903205)	1/11	0.254161	1	3.45662	PYCR1	.
	embryonic eye morphogenesis (GO:0048048)	1/11	0.254161	1	3.45662	ALDH1A3	.
	protein localization to pre-autophagosomal structure (GO:0034497)	1/11	0.254161	1	3.45662	ATG9B	.
	negative regulation of bone mineralization (GO:0030502)	1/11	0.254161	1	3.45662	TRPM4	.
	positive regulation of leukocyte degranulation (GO:0043302)	1/11	0.254161	1	3.45662	F2RL1	.
	regulation of vascular endothelial growth factor signaling pathway (GO:1900746)	1/11	0.254161	1	3.45662	DCN	.
	mesonephros development (GO:0001823)	1/11	0.254161	1	3.45662	GATA3	.
	T cell differentiation in thymus (GO:0033077)	1/11	0.254161	1	3.45662	LIG4	.
	negative regulation of fatty acid biosynthetic process (GO:0045717)	1/11	0.254161	1	3.45662	TRIB3	.
	urea cycle (GO:0000050)	1/11	0.254161	1	3.45662	ACOD1	.
	somite development (GO:0061053)	1/11	0.254161	1	3.45662	PPP2R3A	.
	response to axon injury (GO:0048678)	1/11	0.254161	1	3.45662	DPYSL3	.
	stress granule assembly (GO:0034063)	1/11	0.254161	1	3.45662	GRB7	.
	regulation of chromatin binding (GO:0035561)	1/11	0.254161	1	3.45662	ZNF304	.
	negative regulation of cell division (GO:0051782)	1/11	0.254161	1	3.45662	CHMP4C	.
	negative regulation of receptor binding (GO:1900121)	1/11	0.254161	1	3.45662	PTPRF	.
	cellular response to interferon-beta (GO:0035458)	1/11	0.254161	1	3.45662	ACOD1	.
	positive regulation of fatty acid biosynthetic process (GO:0045723)	1/11	0.254161	1	3.45662	MLXIPL	.
	protein kinase C signaling (GO:0070528)	1/11	0.254161	1	3.45662	ADGRG1	.
	negative regulation of potassium ion transport (GO:0043267)	1/11	0.254161	1	3.45662	CAV1	.
	arginine metabolic process (GO:0006525)	1/11	0.254161	1	3.45662	ACOD1	.
	cellular response to increased oxygen levels (GO:0036295)	1/11	0.254161	1	3.45662	CAV1	.
	positive regulation of fatty acid oxidation (GO:0046321)	1/11	0.254161	1	3.45662	IRS1	.
	magnesium ion transport (GO:0015693)	1/11	0.254161	1	3.45662	NIPAL1	.
	positive regulation of sodium ion transmembrane transporter activity (GO:2000651)	1/11	0.254161	1	3.45662	ANK3	.
	low-density lipoprotein receptor particle metabolic process (GO:0032799)	1/11	0.254161	1	3.45662	VLDLR	.
	positive regulation of glucose metabolic process (GO:0010907)	1/11	0.254161	1	3.45662	IRS1	.
	regulation of cardiac muscle cell differentiation (GO:2000725)	1/11	0.254161	1	3.45662	BMP2	.
	aspartate family amino acid biosynthetic process (GO:0009067)	1/11	0.254161	1	3.45662	ASNS	.
	erythrose 4-phosphate/phosphoenolpyruvate family amino acid catabolic process (GO:1902222)	1/11	0.254161	1	3.45662	TAT	.
	urate metabolic process (GO:0046415)	1/11	0.254161	1	3.45662	PNP	.
	positive regulation of T-helper cell differentiation (GO:0045624)	1/11	0.254161	1	3.45662	PRKCZ	.
	UDP-N-acetylglucosamine biosynthetic process (GO:0006048)	1/11	0.254161	1	3.45662	GFPT2	.
	positive regulation of mitochondrial outer membrane permeabilization involved in apoptotic signaling pathway (GO:1901030)	2/37	0.254172	1	2.05529	TP53BP2;YWHAH	.
	regulation of sodium ion transmembrane transporter activity (GO:2000649)	2/37	0.254172	1	2.05529	ANK3;YWHAH	.
	positive regulation of axonogenesis (GO:0050772)	2/37	0.254172	1	2.05529	PLXNB1;L1CAM	.
	regulation of metal ion transport (GO:0010959)	2/37	0.254172	1	2.05529	ANK3;YWHAH	.
	epidermal cell differentiation (GO:0009913)	3/67	0.258263	1	1.70251	DSP;SCEL;EVPL	.
	negative regulation of protein binding (GO:0032091)	3/67	0.258263	1	1.70251	CAV1;NES;PTPRF	.
	insulin receptor signaling pathway (GO:0008286)	3/67	0.258263	1	1.70251	BAIAP2L1;IRS1;GAB1	.
	regulation of cardiac conduction (GO:1903779)	3/67	0.258263	1	1.70251	CXADR;CAV1;ITPR1	.
	positive regulation of I-kappaB kinase/NF-kappaB signaling (GO:0043123)	6/163	0.259055	1	1.39961	SLC20A1;PLK2;TRAF5;F2RL1;RHOC;S100B	.
	glycosaminoglycan biosynthetic process (GO:0006024)	4/99	0.263399	1	1.53628	B4GALT3;SDC1;HSPG2;DCN	.
	small GTPase mediated signal transduction (GO:0007264)	4/99	0.263399	1	1.53628	PLK2;PLCE1;ARHGAP18;ZNF304	.
	glycerophospholipid biosynthetic process (GO:0046474)	6/164	0.263492	1	1.39108	CDS1;RAB4A;SLC44A4;PIP4K2C;SYNJ2;PTPN13	.
	membrane depolarization during action potential (GO:0086010)	2/38	0.263985	1	2.0012	CACNA1H;YWHAH	.
	regulation of endothelial cell migration (GO:0010594)	3/69	0.272534	1	1.65317	GATA3;ETS1;DCN	.
	regulation of endocytosis (GO:0030100)	3/69	0.272534	1	1.65317	RAB4A;BMP2K;PACSIN3	.
	regulation of osteoblast differentiation (GO:0045667)	3/69	0.272534	1	1.65317	BMP2;AXIN2;TRPM4	.
	Fc-gamma receptor signaling pathway involved in phagocytosis (GO:0038096)	5/133	0.272536	1	1.42943	CYFIP2;YES1;MYO10;FYN;FCGR2B	.
	pulmonary valve morphogenesis (GO:0003184)	1/12	0.273788	1	3.16857	TGFB2	.
	axonal fasciculation (GO:0007413)	1/12	0.273788	1	3.16857	ARHGAP35	.
	regulation of transcription of nuclear large rRNA transcript from RNA polymerase I promoter (GO:1901836)	1/12	0.273788	1	3.16857	MARS	.
	histone H3-K9 demethylation (GO:0033169)	1/12	0.273788	1	3.16857	HR	.
	negative regulation of protein oligomerization (GO:0032460)	1/12	0.273788	1	3.16857	CRYAB	.
	negative regulation of ATPase activity (GO:0032780)	1/12	0.273788	1	3.16857	VCPKMT	.
	fatty acid elongation (GO:0030497)	1/12	0.273788	1	3.16857	ELOVL6	.
	establishment of apical/basal cell polarity (GO:0035089)	1/12	0.273788	1	3.16857	CAMSAP3	.
	retinol metabolic process (GO:0042572)	1/12	0.273788	1	3.16857	RDH11	.
	vesicle budding from membrane (GO:0006900)	1/12	0.273788	1	3.16857	FNBP1L	.
	carbohydrate derivative transport (GO:1901264)	1/12	0.273788	1	3.16857	VLDLR	.
	amino sugar biosynthetic process (GO:0046349)	1/12	0.273788	1	3.16857	GFPT2	.
	regulation of cytokine biosynthetic process (GO:0042035)	1/12	0.273788	1	3.16857	GATA3	.
	UDP-N-acetylglucosamine metabolic process (GO:0006047)	1/12	0.273788	1	3.16857	GFPT2	.
	epithelial structure maintenance (GO:0010669)	1/12	0.273788	1	3.16857	CXADR	.
	regulation of interleukin-2 biosynthetic process (GO:0045076)	1/12	0.273788	1	3.16857	IRF4	.
	positive regulation of amyloid precursor protein catabolic process (GO:1902993)	1/12	0.273788	1	3.16857	EFNA1	.
	negative regulation of substrate adhesion-dependent cell spreading (GO:1900025)	1/12	0.273788	1	3.16857	TACSTD2	.
	DNA ligation involved in DNA repair (GO:0051103)	1/12	0.273788	1	3.16857	LIG4	.
	polyamine metabolic process (GO:0006595)	1/12	0.273788	1	3.16857	SMOX	.
	positive regulation of cardiocyte differentiation (GO:1905209)	1/12	0.273788	1	3.16857	TGFB2	.
	plasminogen activation (GO:0031639)	1/12	0.273788	1	3.16857	PLAT	.
	regulation of protein localization to cell periphery (GO:1904375)	1/12	0.273788	1	3.16857	SPTBN1	.
	regulation of skeletal muscle tissue development (GO:0048641)	1/12	0.273788	1	3.16857	MEGF10	.
	positive regulation of DNA-dependent DNA replication (GO:2000105)	1/12	0.273788	1	3.16857	CDC7	.
	cardiac muscle fiber development (GO:0048739)	1/12	0.273788	1	3.16857	CXADR	.
	negative regulation of ATP metabolic process (GO:1903579)	1/12	0.273788	1	3.16857	MLXIPL	.
	aromatic compound biosynthetic process (GO:0019438)	1/12	0.273788	1	3.16857	PSAT1	.
	regulation of blood vessel size (GO:0050880)	1/12	0.273788	1	3.16857	ADCY6	.
	skeletal muscle cell differentiation (GO:0035914)	1/12	0.273788	1	3.16857	MEGF10	.
	PERK-mediated unfolded protein response (GO:0036499)	1/12	0.273788	1	3.16857	ASNS	.
	regulation of vascular endothelial cell proliferation (GO:1905562)	1/12	0.273788	1	3.16857	FGFR1	.
	endosome transport via multivesicular body sorting pathway (GO:0032509)	1/12	0.273788	1	3.16857	LYST	.
	dermatan sulfate biosynthetic process (GO:0030208)	1/12	0.273788	1	3.16857	DCN	.
	regulation of sister chromatid cohesion (GO:0007063)	1/12	0.273788	1	3.16857	AXIN2	.
	positive regulation of vascular endothelial growth factor receptor signaling pathway (GO:0030949)	1/12	0.273788	1	3.16857	GRB10	.
	positive regulation of T cell cytokine production (GO:0002726)	1/12	0.273788	1	3.16857	PRKCZ	.
	negative regulation of fatty acid metabolic process (GO:0045922)	1/12	0.273788	1	3.16857	TRIB3	.
	microtubule anchoring (GO:0034453)	1/12	0.273788	1	3.16857	CAMSAP3	.
	eye photoreceptor cell differentiation (GO:0001754)	1/12	0.273788	1	3.16857	PROM1	.
	clathrin-dependent endocytosis (GO:0072583)	2/39	0.273799	1	1.94989	SYT1;FNBP1L	.
	positive regulation of phagocytosis (GO:0050766)	2/39	0.273799	1	1.94989	F2RL1;FCGR2B	.
	positive regulation of fat cell differentiation (GO:0045600)	2/39	0.273799	1	1.94989	BMP2;TRPM4	.
	positive regulation of reactive oxygen species metabolic process (GO:2000379)	2/39	0.273799	1	1.94989	ACOD1;F2RL1	.
	alpha-amino acid catabolic process (GO:1901606)	2/39	0.273799	1	1.94989	CBS;TAT	.
	regulation of coenzyme metabolic process (GO:0051196)	2/39	0.273799	1	1.94989	ME1;CELSR1	.
	Fc-gamma receptor signaling pathway (GO:0038094)	5/134	0.277585	1	1.41876	CYFIP2;YES1;MYO10;FYN;FCGR2B	.
	positive regulation of proteasomal ubiquitin-dependent protein catabolic process (GO:0032436)	3/70	0.279701	1	1.62955	CAV1;TRIB3;PRICKLE1	.
	interferon-gamma-mediated signaling pathway (GO:0060333)	3/70	0.279701	1	1.62955	IRF4;IRF6;MID1	.
	negative regulation of developmental process (GO:0051093)	3/70	0.279701	1	1.62955	BMP2;SINHCAF;GATA3	.
	Fc receptor mediated stimulatory signaling pathway (GO:0002431)	5/135	0.282652	1	1.40825	CYFIP2;YES1;MYO10;FYN;FCGR2B	.
	positive regulation of multicellular organismal process (GO:0051240)	7/202	0.282808	1	1.31762	DOCK5;TGFB2;BMP2;RAB25;F2RL1;AXIN2;TRPM4	.
	embryonic heart tube morphogenesis (GO:0003143)	2/40	0.283607	1	1.90114	CCDC39;NDRG4	.
	regulation of cellular localization (GO:0060341)	2/40	0.283607	1	1.90114	PARD6B;WWC1	.
	sensory organ development (GO:0007423)	2/40	0.283607	1	1.90114	TGFB2;GATA3	.
	positive regulation of Ras protein signal transduction (GO:0046579)	2/40	0.283607	1	1.90114	ADGRG1;F2RL1	.
	response to cAMP (GO:0051591)	2/40	0.283607	1	1.90114	AKAP6;EZR	.
	positive regulation of mitotic cell cycle phase transition (GO:1901992)	2/40	0.283607	1	1.90114	CCND1;CDC7	.
	tRNA aminoacylation (GO:0043039)	2/40	0.283607	1	1.90114	MARS;GARS	.
	regulation of intracellular transport (GO:0032386)	2/40	0.283607	1	1.90114	WWC1;CRYAB	.
	regulation of ATPase activity (GO:0043462)	2/40	0.283607	1	1.90114	VCPKMT;PFN2	.
	determination of heart left/right asymmetry (GO:0061371)	2/40	0.283607	1	1.90114	CCDC39;NDRG4	.
	regulation of autophagy (GO:0010506)	7/203	0.286928	1	1.31113	DAPK1;PLK2;ITPR1;SH3BP4;PIP4K2C;MET;DCN	.
	regulation of I-kappaB kinase/NF-kappaB signaling (GO:0043122)	7/204	0.291063	1	1.3047	SLC20A1;PLK2;TRAF5;OTUD7B;F2RL1;RHOC;S100B	.
	regulation of cytosolic calcium ion concentration (GO:0051480)	5/137	0.29284	1	1.38769	CAV1;PLCE1;F2RL1;CD24;TRPM4	.
	DNA-templated transcriptional preinitiation complex assembly (GO:0070897)	1/13	0.292899	1	2.92483	TAF1B	.
	dermatan sulfate metabolic process (GO:0030205)	1/13	0.292899	1	2.92483	DCN	.
	response to iron ion (GO:0010039)	1/13	0.292899	1	2.92483	TFAP2A	.
	regulation of plasma membrane bounded cell projection organization (GO:0120035)	1/13	0.292899	1	2.92483	FCGR2B	.
	nucleotide-sugar metabolic process (GO:0009225)	1/13	0.292899	1	2.92483	GFPT2	.
	cellular response to exogenous dsRNA (GO:0071360)	1/13	0.292899	1	2.92483	CAV1	.
	positive regulation of cardiac muscle cell proliferation (GO:0060045)	1/13	0.292899	1	2.92483	TGFBR3	.
	intestinal absorption (GO:0050892)	1/13	0.292899	1	2.92483	F11R	.
	regulation of superoxide anion generation (GO:0032928)	1/13	0.292899	1	2.92483	F2RL1	.
	embryonic appendage morphogenesis (GO:0035113)	1/13	0.292899	1	2.92483	TGFB2	.
	regulation of NMDA receptor activity (GO:2000310)	1/13	0.292899	1	2.92483	DAPK1	.
	positive regulation of cellular carbohydrate metabolic process (GO:0010676)	1/13	0.292899	1	2.92483	IRS1	.
	renal absorption (GO:0070293)	1/13	0.292899	1	2.92483	CLDN4	.
	steroid catabolic process (GO:0006706)	1/13	0.292899	1	2.92483	YWHAH	.
	very long-chain fatty acid biosynthetic process (GO:0042761)	1/13	0.292899	1	2.92483	ELOVL6	.
	regulation of glucose import in response to insulin stimulus (GO:2001273)	1/13	0.292899	1	2.92483	IRS1	.
	negative regulation of epidermal growth factor-activated receptor activity (GO:0007175)	1/13	0.292899	1	2.92483	CBLC	.
	regulation of biomineral tissue development (GO:0070167)	1/13	0.292899	1	2.92483	BMP2K	.
	positive regulation of glycogen biosynthetic process (GO:0045725)	1/13	0.292899	1	2.92483	IRS1	.
	regulation of macromolecule biosynthetic process (GO:0010556)	1/13	0.292899	1	2.92483	GATA3	.
	multivesicular body sorting pathway (GO:0071985)	1/13	0.292899	1	2.92483	RAB27B	.
	atrial septum development (GO:0003283)	1/13	0.292899	1	2.92483	TGFB2	.
	phosphate ion transport (GO:0006817)	1/13	0.292899	1	2.92483	SLC20A1	.
	regulation of execution phase of apoptosis (GO:1900117)	1/13	0.292899	1	2.92483	TP53BP2	.
	negative regulation of reactive oxygen species biosynthetic process (GO:1903427)	1/13	0.292899	1	2.92483	CAV1	.
	regulation of endothelial cell chemotaxis (GO:2001026)	1/13	0.292899	1	2.92483	MET	.
	positive regulation of ERAD pathway (GO:1904294)	1/13	0.292899	1	2.92483	CAV1	.
	RNA interference (GO:0016246)	1/13	0.292899	1	2.92483	PRKRA	.
	mammary gland epithelium development (GO:0061180)	1/13	0.292899	1	2.92483	IRF6	.
	diacylglycerol metabolic process (GO:0046339)	1/13	0.292899	1	2.92483	PLCE1	.
	regulation of T cell cytokine production (GO:0002724)	1/13	0.292899	1	2.92483	TRPM4	.
	chondroitin sulfate catabolic process (GO:0030207)	1/13	0.292899	1	2.92483	DCN	.
	negative regulation of chemokine production (GO:0032682)	1/13	0.292899	1	2.92483	F2RL1	.
	endothelial cell differentiation (GO:0045446)	1/13	0.292899	1	2.92483	LAMA5	.
	negative regulation of interleukin-10 production (GO:0032693)	1/13	0.292899	1	2.92483	FCGR2B	.
	positive regulation of smoothened signaling pathway (GO:0045880)	1/13	0.292899	1	2.92483	DLG5	.
	detection of calcium ion (GO:0005513)	1/13	0.292899	1	2.92483	SYT1	.
	pre-miRNA processing (GO:0031054)	1/13	0.292899	1	2.92483	PRKRA	.
	regulation of calcium-mediated signaling (GO:0050848)	2/41	0.293402	1	1.85477	ITPR1;JPH1	.
	regulation of substrate adhesion-dependent cell spreading (GO:1900024)	2/41	0.293402	1	1.85477	DOCK5;TACSTD2	.
	cellular response to peptide (GO:1901653)	2/41	0.293402	1	1.85477	CAV1;FCGR2B	.
	negative regulation of STAT cascade (GO:1904893)	2/41	0.293402	1	1.85477	CAV1;DCN	.
	monocyte chemotaxis (GO:0002548)	2/41	0.293402	1	1.85477	CCL22;CX3CL1	.
	cellular response to oxygen-containing compound (GO:1901701)	9/274	0.295957	1	1.24892	P2RY12;MLXIPL;DAPK1;ACOD1;SH3BP4;AKAP6;PTPRK;EZR;ADCY6	.
	G1/S transition of mitotic cell cycle (GO:0000082)	4/105	0.298627	1	1.44849	WEE1;CCND1;PLK2;CDC7	.
	regulation of primary metabolic process (GO:0080090)	5/139	0.30309	1	1.36773	IRS1;FHL2;ME1;TRIB3;GRHL1	.
	negative regulation of protein secretion (GO:0050709)	2/42	0.303178	1	1.81061	IRS1;FCGR2B	.
	positive regulation of cellular component organization (GO:0051130)	4/106	0.304558	1	1.43482	TGFB2;DLG5;ADGRL1;PROM2	.
	regulation of cellular component organization (GO:0051128)	5/140	0.308235	1	1.35796	CAMSAP3;RAB4A;BMP2K;PLCE1;PACSIN3	.
	inorganic cation transmembrane transport (GO:0098662)	5/140	0.308235	1	1.35796	TRPV6;SCNN1A;KCNK1;CACNA1H;TRPM4	.
	negative regulation of transcription, DNA-templated (GO:0045892)	24/813	0.308897	1	1.12244	CDKN1C;TFAP2A;WWC1;CAV1;FHL2;OTUD7B;GATA3;VLDLR;PTPRK;PRICKLE1;TBX3;ARHGAP35;DKK3;EFNA1;MLXIPL;BMP2;ZEB1;CCND1;ELF3;TRIB3;ATF5;EZR;RCOR3;MTA3	.
	positive regulation of neural precursor cell proliferation (GO:2000179)	1/14	0.311507	1	2.71592	NES	.
	regulation of Golgi organization (GO:1903358)	1/14	0.311507	1	2.71592	CAMSAP3	.
	regulation of lipase activity (GO:0060191)	1/14	0.311507	1	2.71592	RHOC	.
	gliogenesis (GO:0042063)	1/14	0.311507	1	2.71592	TGFB2	.
	regulation of nucleocytoplasmic transport (GO:0046822)	1/14	0.311507	1	2.71592	PTPN14	.
	regulation of phosphate metabolic process (GO:0019220)	1/14	0.311507	1	2.71592	CD24	.
	neurotransmitter biosynthetic process (GO:0042136)	1/14	0.311507	1	2.71592	SLC44A4	.
	regulation of extracellular matrix disassembly (GO:0010715)	1/14	0.311507	1	2.71592	DDR1	.
	negative regulation of Rho protein signal transduction (GO:0035024)	1/14	0.311507	1	2.71592	MET	.
	regulation of calcineurin-NFAT signaling cascade (GO:0070884)	1/14	0.311507	1	2.71592	AKAP6	.
	modified amino acid transport (GO:0072337)	1/14	0.311507	1	2.71592	SLC1A4	.
	cell communication by electrical coupling involved in cardiac conduction (GO:0086064)	1/14	0.311507	1	2.71592	PKP2	.
	negative regulation of focal adhesion assembly (GO:0051895)	1/14	0.311507	1	2.71592	PHLDB2	.
	pancreas development (GO:0031016)	1/14	0.311507	1	2.71592	CCDC39	.
	negative regulation of secretion (GO:0051048)	1/14	0.311507	1	2.71592	ERBB3	.
	positive regulation of mitochondrial fission (GO:0090141)	1/14	0.311507	1	2.71592	DCN	.
	regulation of neural precursor cell proliferation (GO:2000177)	1/14	0.311507	1	2.71592	NES	.
	negative regulation of biomineral tissue development (GO:0070168)	1/14	0.311507	1	2.71592	TRPM4	.
	purine-containing compound salvage (GO:0043101)	1/14	0.311507	1	2.71592	PNP	.
	positive regulation of glycogen metabolic process (GO:0070875)	1/14	0.311507	1	2.71592	IRS1	.
	amyloid-beta metabolic process (GO:0050435)	1/14	0.311507	1	2.71592	BACE2	.
	regulation of ventricular cardiac muscle cell membrane repolarization (GO:0060307)	1/14	0.311507	1	2.71592	NOS1AP	.
	neutrophil activation (GO:0042119)	1/14	0.311507	1	2.71592	F2RL1	.
	regulation of fatty acid metabolic process (GO:0019217)	1/14	0.311507	1	2.71592	CAV1	.
	cAMP biosynthetic process (GO:0006171)	1/14	0.311507	1	2.71592	ADCY6	.
	regulation of gastrulation (GO:0010470)	1/14	0.311507	1	2.71592	PHLDB2	.
	negative regulation of smooth muscle cell migration (GO:0014912)	1/14	0.311507	1	2.71592	NDRG4	.
	purine nucleotide catabolic process (GO:0006195)	1/14	0.311507	1	2.71592	PNP	.
	positive regulation of heart rate (GO:0010460)	1/14	0.311507	1	2.71592	TRPM4	.
	interleukin-6-mediated signaling pathway (GO:0070102)	1/14	0.311507	1	2.71592	ST18	.
	positive regulation of calcium ion-dependent exocytosis (GO:0045956)	1/14	0.311507	1	2.71592	CACNA1H	.
	regulation of adaptive immune response (GO:0002819)	1/14	0.311507	1	2.71592	FCGR2B	.
	negative regulation of T cell receptor signaling pathway (GO:0050860)	1/14	0.311507	1	2.71592	EZR	.
	negative regulation of cation transmembrane transport (GO:1904063)	1/14	0.311507	1	2.71592	CAV1	.
	positive regulation of interleukin-8 secretion (GO:2000484)	1/14	0.311507	1	2.71592	F2RL1	.
	purine-containing compound catabolic process (GO:0072523)	1/14	0.311507	1	2.71592	PNP	.
	positive regulation of blood vessel diameter (GO:0097755)	1/14	0.311507	1	2.71592	F2RL1	.
	response to ATP (GO:0033198)	1/14	0.311507	1	2.71592	P2RY12	.
	male gonad development (GO:0008584)	2/43	0.31293	1	1.7685	TGFB2;GATA3	.
	development of primary male sexual characteristics (GO:0046546)	2/43	0.31293	1	1.7685	TGFB2;GATA3	.
	intrinsic apoptotic signaling pathway by p53 class mediator (GO:0072332)	2/43	0.31293	1	1.7685	JMY;TP53BP2	.
	branching morphogenesis of an epithelial tube (GO:0048754)	2/43	0.31293	1	1.7685	BMP2;MET	.
	regulation of multicellular organismal development (GO:2000026)	2/43	0.31293	1	1.7685	CD24;PHLDB2	.
	C-terminal protein lipidation (GO:0006501)	3/75	0.315736	1	1.52091	CD109;LYPD3;LY6G6C	.
	cAMP-mediated signaling (GO:0019933)	3/75	0.315736	1	1.52091	ADGRG6;AKAP6;ADCY6	.
	monocarboxylic acid metabolic process (GO:0032787)	4/108	0.316456	1	1.40825	ALDH1A3;ME1;CELSR1;GGT1	.
	regulation of cytokine production (GO:0001817)	4/108	0.316456	1	1.40825	AFAP1L2;MOG;GATA3;DTX4	.
	regulation of focal adhesion assembly (GO:0051893)	2/44	0.322652	1	1.72831	CAMSAP3;PHLDB2	.
	sprouting angiogenesis (GO:0002040)	2/44	0.322652	1	1.72831	LOXL4;PARVA	.
	lymphocyte chemotaxis (GO:0048247)	2/44	0.322652	1	1.72831	CCL22;CX3CL1	.
	amide biosynthetic process (GO:0043604)	2/44	0.322652	1	1.72831	ASNS;ACOD1	.
	positive regulation of viral life cycle (GO:1903902)	2/44	0.322652	1	1.72831	CHMP4C;TMPRSS2	.
	negative regulation of immune system process (GO:0002683)	2/44	0.322652	1	1.72831	TGFB2;FCGR2B	.
	regulation of dendrite morphogenesis (GO:0048814)	2/44	0.322652	1	1.72831	LZTS3;YWHAH	.
	positive regulation of macroautophagy (GO:0016239)	2/44	0.322652	1	1.72831	PIP4K2C;DCN	.
	positive regulation of interleukin-8 production (GO:0032757)	2/44	0.322652	1	1.72831	AFAP1L2;F2RL1	.
	regulation of steroid biosynthetic process (GO:0050810)	2/44	0.322652	1	1.72831	BMP2;ELOVL6	.
	nucleic acid-templated transcription (GO:0097659)	3/76	0.322963	1	1.5009	TAF1B;BAZ2B;SMARCA1	.
	positive regulation of establishment of protein localization to mitochondrion (GO:1903749)	4/110	0.328392	1	1.38265	ABLIM3;TP53BP2;RHOU;YWHAH	.
	myotube differentiation (GO:0014902)	1/15	0.329627	1	2.53485	CACNA1H	.
	positive regulation of alpha-beta T cell activation (GO:0046635)	1/15	0.329627	1	2.53485	PNP	.
	NAD biosynthesis via nicotinamide riboside salvage pathway (GO:0034356)	1/15	0.329627	1	2.53485	PNP	.
	regulation of branching involved in ureteric bud morphogenesis (GO:0090189)	1/15	0.329627	1	2.53485	TACSTD2	.
	apoptotic DNA fragmentation (GO:0006309)	1/15	0.329627	1	2.53485	CECR2	.
	retinoic acid metabolic process (GO:0042573)	1/15	0.329627	1	2.53485	ALDH1A3	.
	negative regulation of peptidyl-threonine phosphorylation (GO:0010801)	1/15	0.329627	1	2.53485	PARD3	.
	selective autophagy (GO:0061912)	1/15	0.329627	1	2.53485	STBD1	.
	maintenance of protein location in nucleus (GO:0051457)	1/15	0.329627	1	2.53485	SYNE1	.
	negative regulation of adherens junction organization (GO:1903392)	1/15	0.329627	1	2.53485	PHLDB2	.
	epithelial cilium movement (GO:0003351)	1/15	0.329627	1	2.53485	CCDC39	.
	autonomic nervous system development (GO:0048483)	1/15	0.329627	1	2.53485	GATA3	.
	embryonic axis specification (GO:0000578)	1/15	0.329627	1	2.53485	TBX3	.
	positive regulation of mesonephros development (GO:0061213)	1/15	0.329627	1	2.53485	GATA3	.
	negative regulation of platelet-derived growth factor receptor signaling pathway (GO:0010642)	1/15	0.329627	1	2.53485	NDRG4	.
	response to X-ray (GO:0010165)	1/15	0.329627	1	2.53485	LIG4	.
	pyrimidine nucleoside biosynthetic process (GO:0046134)	1/15	0.329627	1	2.53485	ACOD1	.
	transport along microtubule (GO:0010970)	1/15	0.329627	1	2.53485	CAMSAP3	.
	L-alpha-amino acid transmembrane transport (GO:1902475)	1/15	0.329627	1	2.53485	SLC7A1	.
	negative regulation of insulin secretion (GO:0046676)	1/15	0.329627	1	2.53485	IRS1	.
	positive regulation of cytokine production involved in immune response (GO:0002720)	1/15	0.329627	1	2.53485	F2RL1	.
	ventricular cardiac muscle cell action potential (GO:0086005)	1/15	0.329627	1	2.53485	PKP2	.
	sodium ion import (GO:0097369)	1/15	0.329627	1	2.53485	TRPM4	.
	unsaturated fatty acid biosynthetic process (GO:0006636)	1/15	0.329627	1	2.53485	FADS3	.
	cardiac muscle cell differentiation (GO:0055007)	1/15	0.329627	1	2.53485	BMP2	.
	regulation of centriole replication (GO:0046599)	1/15	0.329627	1	2.53485	PLK2	.
	dermatan sulfate proteoglycan biosynthetic process (GO:0050651)	1/15	0.329627	1	2.53485	DCN	.
	negative regulation of interleukin-2 production (GO:0032703)	1/15	0.329627	1	2.53485	EZR	.
	regulation of clathrin-dependent endocytosis (GO:2000369)	1/15	0.329627	1	2.53485	BMP2K	.
	pyrimidine nucleoside metabolic process (GO:0006213)	1/15	0.329627	1	2.53485	ACOD1	.
	regulation of cell-substrate junction assembly (GO:0090109)	1/15	0.329627	1	2.53485	CAMSAP3	.
	positive regulation of phosphoprotein phosphatase activity (GO:0032516)	1/15	0.329627	1	2.53485	AKAP6	.
	cellular biogenic amine biosynthetic process (GO:0042401)	1/15	0.329627	1	2.53485	SMOX	.
	negative regulation of muscle cell differentiation (GO:0051148)	1/15	0.329627	1	2.53485	TBX3	.
	positive regulation of viral release from host cell (GO:1902188)	1/15	0.329627	1	2.53485	CHMP4C	.
	sodium ion import across plasma membrane (GO:0098719)	1/15	0.329627	1	2.53485	TRPM4	.
	negative regulation of axon extension involved in axon guidance (GO:0048843)	1/15	0.329627	1	2.53485	SEMA3F	.
	cofactor transport (GO:0051181)	1/15	0.329627	1	2.53485	SLC44A4	.
	negative regulation of cytokine production involved in immune response (GO:0002719)	1/15	0.329627	1	2.53485	TGFB2	.
	filopodium assembly (GO:0046847)	1/15	0.329627	1	2.53485	EZR	.
	positive regulation of exosomal secretion (GO:1903543)	1/15	0.329627	1	2.53485	SDC1	.
	negative regulation of protein processing (GO:0010955)	1/15	0.329627	1	2.53485	CHAC1	.
	positive regulation of cysteine-type endopeptidase activity involved in apoptotic signaling pathway (GO:2001269)	1/15	0.329627	1	2.53485	ST18	.
	regulation of cartilage development (GO:0061035)	1/15	0.329627	1	2.53485	BMP2	.
	regulation of cytokinesis (GO:0032465)	3/77	0.330191	1	1.48141	CSPP1;KIF13A;CHMP4C	.
	positive regulation of blood vessel endothelial cell migration (GO:0043536)	2/45	0.332339	1	1.6899	ETS1;FGFR1	.
	nicotinamide nucleotide metabolic process (GO:0046496)	2/45	0.332339	1	1.6899	PFKFB2;TP53I3	.
	nucleus organization (GO:0006997)	2/45	0.332339	1	1.6899	CHMP4C;SYNE1	.
	protein complex subunit organization (GO:0071822)	2/45	0.332339	1	1.6899	TGFB2;LOXL4	.
	negative regulation of ossification (GO:0030279)	2/45	0.332339	1	1.6899	AXIN2;TRPM4	.
	peptidyl-serine phosphorylation (GO:0018105)	5/145	0.334128	1	1.31113	MAST4;PLK2;CDC7;PRKCZ;DCLK1	.
	regulation of protein binding (GO:0043393)	4/111	0.33437	1	1.37019	BMP2;CAV1;TRIB3;NES	.
	positive regulation of sequence-specific DNA binding transcription factor activity (GO:0051091)	7/215	0.337317	1	1.23795	FOXA1;JUP;RIPK4;JMY;TRAF5;PRKCZ;ARHGEF5	.
	sensory perception of mechanical stimulus (GO:0050954)	3/78	0.337416	1	1.46242	TFAP2A;MARVELD2;EPS8L2	.
	fibroblast growth factor receptor signaling pathway (GO:0008543)	3/78	0.337416	1	1.46242	ESRP2;ESRP1;FGFR1	.
	organonitrogen compound biosynthetic process (GO:1901566)	6/181	0.341274	1	1.26042	SLC44A4;ACOD1;ASNS;PYCR1;ELOVL6;RIMKLB	.
	cellular response to ionizing radiation (GO:0071479)	2/46	0.341986	1	1.65317	YAP1;CRYAB	.
	cartilage development (GO:0051216)	2/46	0.341986	1	1.65317	BMP2;SULF2	.
	tRNA aminoacylation for protein translation (GO:0006418)	2/46	0.341986	1	1.65317	MARS;GARS	.
	regulation of fibroblast proliferation (GO:0048145)	2/46	0.341986	1	1.65317	PDGFC;LIG4	.
	aminoglycan biosynthetic process (GO:0006023)	2/46	0.341986	1	1.65317	SDC1;HSPG2	.
	negative regulation of autophagy (GO:0010507)	2/46	0.341986	1	1.65317	NRBP2;MET	.
	response to calcium ion (GO:0051592)	3/79	0.344637	1	1.4439	SYT1;TRPV6;CAV1	.
	regulation of organelle organization (GO:0033043)	4/113	0.346338	1	1.34594	CAMSAP3;PLXNB1;EZR;ARHGEF5	.
	peptidyl-threonine dephosphorylation (GO:0035970)	1/16	0.347271	1	2.37643	DUSP18	.
	C21-steroid hormone biosynthetic process (GO:0006700)	1/16	0.347271	1	2.37643	CACNA1H	.
	dendritic cell chemotaxis (GO:0002407)	1/16	0.347271	1	2.37643	TRPM4	.
	DNA strand elongation involved in DNA replication (GO:0006271)	1/16	0.347271	1	2.37643	LIG4	.
	fibrinolysis (GO:0042730)	1/16	0.347271	1	2.37643	PLAT	.
	cellular response to dsRNA (GO:0071359)	1/16	0.347271	1	2.37643	CAV1	.
	protein transport along microtubule (GO:0098840)	1/16	0.347271	1	2.37643	CAMSAP3	.
	sialylation (GO:0097503)	1/16	0.347271	1	2.37643	ST6GAL1	.
	embryonic digit morphogenesis (GO:0042733)	1/16	0.347271	1	2.37643	TBX3	.
	positive regulation of regulated secretory pathway (GO:1903307)	1/16	0.347271	1	2.37643	CACNA1H	.
	leukocyte tethering or rolling (GO:0050901)	1/16	0.347271	1	2.37643	SELE	.
	negative regulation of response to wounding (GO:1903035)	1/16	0.347271	1	2.37643	CD109	.
	regulation of reactive oxygen species biosynthetic process (GO:1903426)	1/16	0.347271	1	2.37643	NOS1AP	.
	regulation of exosomal secretion (GO:1903541)	1/16	0.347271	1	2.37643	SDC1	.
	cardiac ventricle development (GO:0003231)	1/16	0.347271	1	2.37643	GATA3	.
	stabilization of membrane potential (GO:0030322)	1/16	0.347271	1	2.37643	KCNK1	.
	negative regulation of striated muscle cell differentiation (GO:0051154)	1/16	0.347271	1	2.37643	BMP2	.
	negative regulation of steroid biosynthetic process (GO:0010894)	1/16	0.347271	1	2.37643	BMP2	.
	leukocyte adhesion to vascular endothelial cell (GO:0061756)	1/16	0.347271	1	2.37643	SELE	.
	positive regulation of lymphocyte differentiation (GO:0045621)	1/16	0.347271	1	2.37643	GATA3	.
	regulation of energy homeostasis (GO:2000505)	1/16	0.347271	1	2.37643	MLXIPL	.
	positive regulation of cardiac muscle hypertrophy (GO:0010613)	1/16	0.347271	1	2.37643	AKAP6	.
	positive regulation of immune system process (GO:0002684)	1/16	0.347271	1	2.37643	TGFB2	.
	peptidyl-lysine methylation (GO:0018022)	1/16	0.347271	1	2.37643	VCPKMT	.
	positive regulation of cilium assembly (GO:0045724)	1/16	0.347271	1	2.37643	ARHGAP35	.
	miRNA metabolic process (GO:0010586)	1/16	0.347271	1	2.37643	PRKRA	.
	bone morphogenesis (GO:0060349)	1/16	0.347271	1	2.37643	TFAP2A	.
	genitalia development (GO:0048806)	1/16	0.347271	1	2.37643	TBX3	.
	positive regulation of nitric-oxide synthase activity (GO:0051000)	1/16	0.347271	1	2.37643	NOS1AP	.
	negative regulation of peptide hormone secretion (GO:0090278)	1/16	0.347271	1	2.37643	IRS1	.
	regulation of protein homodimerization activity (GO:0043496)	1/16	0.347271	1	2.37643	TRAF4	.
	odontogenesis of dentin-containing tooth (GO:0042475)	1/16	0.347271	1	2.37643	BMP2	.
	regulation of acrosome reaction (GO:0060046)	1/16	0.347271	1	2.37643	CACNA1H	.
	activation of protein kinase A activity (GO:0034199)	1/16	0.347271	1	2.37643	ADCY6	.
	embryonic heart tube development (GO:0035050)	1/16	0.347271	1	2.37643	NDRG4	.
	ruffle organization (GO:0031529)	1/16	0.347271	1	2.37643	LIMA1	.
	neurotransmitter transport (GO:0006836)	1/16	0.347271	1	2.37643	SLC38A1	.
	regulation of glucose transport (GO:0010827)	1/16	0.347271	1	2.37643	TRIB3	.
	positive regulation of positive chemotaxis (GO:0050927)	1/16	0.347271	1	2.37643	F2RL1	.
	inner dynein arm assembly (GO:0036159)	1/16	0.347271	1	2.37643	CCDC39	.
	mesenchyme development (GO:0060485)	1/16	0.347271	1	2.37643	BMP2	.
	positive regulation of response to endoplasmic reticulum stress (GO:1905898)	1/16	0.347271	1	2.37643	FCGR2B	.
	peptide cross-linking (GO:0018149)	2/47	0.351588	1	1.61799	DSP;EVPL	.
	negative regulation of cellular biosynthetic process (GO:0031327)	2/47	0.351588	1	1.61799	CAV1;TRIB3	.
	regulation of organelle assembly (GO:1902115)	2/47	0.351588	1	1.61799	PLK2;EZR	.
	negative regulation of JAK-STAT cascade (GO:0046426)	2/47	0.351588	1	1.61799	CAV1;DCN	.
	fatty acid biosynthetic process (GO:0006633)	2/47	0.351588	1	1.61799	FADS3;ELOVL6	.
	positive regulation of pathway-restricted SMAD protein phosphorylation (GO:0010862)	2/47	0.351588	1	1.61799	TGFB2;BMP2	.
	negative regulation of MAPK cascade (GO:0043409)	3/80	0.351851	1	1.42586	CAV1;CBLC;EZR	.
	negative regulation of cell growth (GO:0030308)	4/115	0.358315	1	1.32253	TGFB2;SH3BP4;APBB2;DCBLD2	.
	sensory perception of sound (GO:0007605)	3/81	0.359056	1	1.40825	TFAP2A;MARVELD2;EPS8L2	.
	endosome to lysosome transport (GO:0008333)	2/48	0.361141	1	1.58428	KIF13A;LYST	.
	cytoplasmic microtubule organization (GO:0031122)	2/48	0.361141	1	1.58428	CAMSAP3;EZR	.
	regulation of cell cycle arrest (GO:0071156)	2/48	0.361141	1	1.58428	MLXIPL;CCND1	.
	negative regulation of gene expression (GO:0010629)	18/618	0.362356	1	1.10746	CDKN1C;TFAP2A;GRB7;TGFB2;DAPK1;GATA3;PTPRK;PRICKLE1;TBX3;ARHGAP35;DKK3;MLXIPL;BMP2;ZEB1;ELF3;TRIB3;ATF5;MTA3	.
	regulation of cellular protein catabolic process (GO:1903362)	1/17	0.364452	1	2.23664	EZR	.
	negative regulation of axon guidance (GO:1902668)	1/17	0.364452	1	2.23664	SEMA3F	.
	negative regulation of antigen receptor-mediated signaling pathway (GO:0050858)	1/17	0.364452	1	2.23664	EZR	.
	response to interferon-alpha (GO:0035455)	1/17	0.364452	1	2.23664	GATA3	.
	regulation of insulin-like growth factor receptor signaling pathway (GO:0043567)	1/17	0.364452	1	2.23664	BMP2	.
	positive regulation of nitrogen compound metabolic process (GO:0051173)	1/17	0.364452	1	2.23664	GATA3	.
	2-oxoglutarate metabolic process (GO:0006103)	1/17	0.364452	1	2.23664	TAT	.
	glycosphingolipid biosynthetic process (GO:0006688)	1/17	0.364452	1	2.23664	A4GALT	.
	cardiac muscle cell contraction (GO:0086003)	1/17	0.364452	1	2.23664	PKP2	.
	positive regulation of interleukin-6 secretion (GO:2000778)	1/17	0.364452	1	2.23664	F2RL1	.
	positive regulation of fatty acid metabolic process (GO:0045923)	1/17	0.364452	1	2.23664	MLXIPL	.
	RNA stabilization (GO:0043489)	1/17	0.364452	1	2.23664	AXIN2	.
	negative regulation of B cell activation (GO:0050869)	1/17	0.364452	1	2.23664	FCGR2B	.
	positive regulation of response to biotic stimulus (GO:0002833)	1/17	0.364452	1	2.23664	ACOD1	.
	positive regulation of dendrite extension (GO:1903861)	1/17	0.364452	1	2.23664	SYT1	.
	pigment granule transport (GO:0051904)	1/17	0.364452	1	2.23664	RAB27B	.
	negative regulation of interleukin-8 production (GO:0032717)	1/17	0.364452	1	2.23664	OTUD7B	.
	cardiac atrium morphogenesis (GO:0003209)	1/17	0.364452	1	2.23664	TGFB2	.
	regulation of myelination (GO:0031641)	1/17	0.364452	1	2.23664	PARD3	.
	negative regulation of tumor necrosis factor-mediated signaling pathway (GO:0010804)	1/17	0.364452	1	2.23664	F2RL1	.
	negative regulation of reactive oxygen species metabolic process (GO:2000378)	1/17	0.364452	1	2.23664	TFAP2A	.
	positive regulation of stem cell proliferation (GO:2000648)	1/17	0.364452	1	2.23664	EPCAM	.
	negative regulation of intracellular transport (GO:0032387)	1/17	0.364452	1	2.23664	CRYAB	.
	positive regulation of cellular protein catabolic process (GO:1903364)	1/17	0.364452	1	2.23664	EZR	.
	peptidyl-lysine trimethylation (GO:0018023)	1/17	0.364452	1	2.23664	VCPKMT	.
	positive regulation of calcium ion transmembrane transporter activity (GO:1901021)	1/17	0.364452	1	2.23664	AKAP6	.
	regulation of transcription from RNA polymerase I promoter (GO:0006356)	1/17	0.364452	1	2.23664	ERBB2	.
	heterocycle biosynthetic process (GO:0018130)	1/17	0.364452	1	2.23664	PYCR1	.
	nucleotide catabolic process (GO:0009166)	1/17	0.364452	1	2.23664	PNP	.
	serine family amino acid metabolic process (GO:0009069)	1/17	0.364452	1	2.23664	CBS	.
	positive chemotaxis (GO:0050918)	1/17	0.364452	1	2.23664	MET	.
	detection of mechanical stimulus (GO:0050982)	1/17	0.364452	1	2.23664	JUP	.
	melanosome transport (GO:0032402)	1/17	0.364452	1	2.23664	RAB27B	.
	positive regulation of cartilage development (GO:0061036)	1/17	0.364452	1	2.23664	BMP2	.
	regulation of early endosome to late endosome transport (GO:2000641)	1/17	0.364452	1	2.23664	EZR	.
	nucleobase-containing compound biosynthetic process (GO:0034654)	1/17	0.364452	1	2.23664	PNP	.
	positive regulation of transcription of Notch receptor target (GO:0007221)	1/17	0.364452	1	2.23664	WWC1	.
	membrane depolarization during cardiac muscle cell action potential (GO:0086012)	1/17	0.364452	1	2.23664	TRPM4	.
	DNA-templated transcription, initiation (GO:0006352)	6/186	0.364682	1	1.22654	YAP1;CCND1;TAF1B;CAVIN1;TAF4B;TEAD3	.
	positive regulation of programmed cell death (GO:0043068)	8/257	0.364689	1	1.18359	UNC13B;FOXA1;BMP2;RASSF2;JMY;ARHGEF16;PAWR;ARHGEF5	.
	regulation of anatomical structure morphogenesis (GO:0022603)	3/82	0.36625	1	1.39108	ERBB2;ETS1;PHLDB2	.
	DNA damage response, signal transduction by p53 class mediator (GO:0030330)	3/82	0.36625	1	1.39108	PCBP4;PLK2;MYO6	.
	positive regulation of transmembrane receptor protein serine/threonine kinase signaling pathway (GO:0090100)	3/82	0.36625	1	1.39108	CDKN1C;TGFB2;BMP2	.
	C-terminal protein amino acid modification (GO:0018410)	3/82	0.36625	1	1.39108	CD109;LYPD3;LY6G6C	.
	negative regulation of binding (GO:0051100)	3/82	0.36625	1	1.39108	CAV1;ZNF304;NES	.
	regulation of reactive oxygen species metabolic process (GO:2000377)	2/49	0.370642	1	1.55195	TFAP2A;ACOD1	.
	regulation of release of sequestered calcium ion into cytosol (GO:0051279)	2/49	0.370642	1	1.55195	AKAP6;JPH1	.
	protein stabilization (GO:0050821)	5/152	0.370653	1	1.25075	EFNA1;RASSF2;PRKRA;CRYAB;PFN2	.
	positive regulation of protein ubiquitination (GO:0031398)	3/83	0.373429	1	1.37432	CAV1;TRIB3;PRICKLE1	.
	negative regulation of neuron death (GO:1901215)	3/83	0.373429	1	1.37432	NRBP2;ERBB3;LIG4	.
	positive regulation of homeostatic process (GO:0032846)	3/83	0.373429	1	1.37432	CAV1;ETS1;TRPM4	.
	receptor-mediated endocytosis (GO:0006898)	6/188	0.374072	1	1.21349	CAV1;SNX9;VLDLR;FNBP1L;FCGR2B;HSPG2	.
	spermatogenesis (GO:0007283)	5/153	0.375879	1	1.24258	ADAM28;TDRD6;GGT1;SPATA6;WFDC2	.
	male gamete generation (GO:0048232)	5/154	0.381106	1	1.23451	ADAM28;TDRD6;GGT1;SPATA6;WFDC2	.
	glucan catabolic process (GO:0009251)	1/18	0.381181	1	2.11238	STBD1	.
	regulation of adherens junction organization (GO:1903391)	1/18	0.381181	1	2.11238	CAMSAP3	.
	long-chain fatty-acyl-CoA biosynthetic process (GO:0035338)	1/18	0.381181	1	2.11238	ELOVL6	.
	establishment of melanosome localization (GO:0032401)	1/18	0.381181	1	2.11238	RAB27B	.
	membrane protein ectodomain proteolysis (GO:0006509)	1/18	0.381181	1	2.11238	BACE2	.
	regulation of viral process (GO:0050792)	1/18	0.381181	1	2.11238	CHMP4C	.
	regulation of amyloid-beta formation (GO:1902003)	1/18	0.381181	1	2.11238	EFNA1	.
	receptor localization to synapse (GO:0097120)	1/18	0.381181	1	2.11238	DLG3	.
	regulation of spindle organization (GO:0090224)	1/18	0.381181	1	2.11238	GNAI1	.
	regulation of keratinocyte proliferation (GO:0010837)	1/18	0.381181	1	2.11238	PTPRK	.
	glucan biosynthetic process (GO:0009250)	1/18	0.381181	1	2.11238	PGM5	.
	calcium-mediated signaling using intracellular calcium source (GO:0035584)	1/18	0.381181	1	2.11238	ADGRL1	.
	positive regulation of lipid catabolic process (GO:0050996)	1/18	0.381181	1	2.11238	IRS1	.
	anterior/posterior axis specification (GO:0009948)	1/18	0.381181	1	2.11238	TBX3	.
	leukotriene biosynthetic process (GO:0019370)	1/18	0.381181	1	2.11238	GGT1	.
	ubiquitin-dependent protein catabolic process via the multivesicular body sorting pathway (GO:0043162)	1/18	0.381181	1	2.11238	TOM1L1	.
	anion homeostasis (GO:0055081)	1/18	0.381181	1	2.11238	MLXIPL	.
	negative regulation of microtubule depolymerization (GO:0007026)	1/18	0.381181	1	2.11238	CAMSAP3	.
	regulation of cardiac muscle cell proliferation (GO:0060043)	1/18	0.381181	1	2.11238	TGFBR3	.
	regulation of cardiac muscle cell membrane repolarization (GO:0099623)	1/18	0.381181	1	2.11238	NOS1AP	.
	positive regulation of actin cytoskeleton reorganization (GO:2000251)	1/18	0.381181	1	2.11238	BAIAP2L1	.
	positive regulation of p38MAPK cascade (GO:1900745)	1/18	0.381181	1	2.11238	BMP2	.
	glycogen catabolic process (GO:0005980)	1/18	0.381181	1	2.11238	STBD1	.
	glycogen biosynthetic process (GO:0005978)	1/18	0.381181	1	2.11238	PGM5	.
	regulation of cAMP-mediated signaling (GO:0043949)	1/18	0.381181	1	2.11238	GNAI1	.
	regulation of cellular response to growth factor stimulus (GO:0090287)	1/18	0.381181	1	2.11238	ITGA3	.
	DNA methylation (GO:0006306)	1/18	0.381181	1	2.11238	ZFP57	.
	regulation of microtubule polymerization or depolymerization (GO:0031110)	1/18	0.381181	1	2.11238	CAMSAP3	.
	regulation of peptidase activity (GO:0052547)	1/18	0.381181	1	2.11238	CAV1	.
	regulation of dendrite extension (GO:1903859)	1/18	0.381181	1	2.11238	SYT1	.
	regulation of smooth muscle cell migration (GO:0014910)	1/18	0.381181	1	2.11238	NDRG4	.
	DNA ligation (GO:0006266)	1/18	0.381181	1	2.11238	LIG4	.
	negative regulation of calcium-mediated signaling (GO:0050849)	1/18	0.381181	1	2.11238	ITPR1	.
	regulation of peptidyl-tyrosine phosphorylation (GO:0050730)	3/85	0.387738	1	1.34198	EFNA1;FYN;PRKCZ	.
	macromolecular complex assembly (GO:0065003)	4/120	0.388214	1	1.26743	YAP1;OCLN;PARD6B;PARD3	.
	negative regulation of growth (GO:0045926)	4/120	0.388214	1	1.26743	TGFB2;SH3BP4;APBB2;DCBLD2	.
	endocytosis (GO:0006897)	8/263	0.388618	1	1.15659	CAV1;MYO6;SNX9;CDC7;RHOU;VLDLR;FCGR2B;HSPG2	.
	negative regulation of neuron projection development (GO:0010977)	2/51	0.389468	1	1.49109	DPYSL3;ADCY6	.
	positive regulation of developmental growth (GO:0048639)	2/51	0.389468	1	1.49109	SYT1;L1CAM	.
	regulation of mitotic spindle assembly (GO:1901673)	1/19	0.397471	1	2.0012	CHMP4C	.
	positive regulation of transforming growth factor beta receptor signaling pathway (GO:0030511)	1/19	0.397471	1	2.0012	CDKN1C	.
	negative regulation of smoothened signaling pathway (GO:0045879)	1/19	0.397471	1	2.0012	TULP3	.
	positive regulation of chromosome organization (GO:2001252)	1/19	0.397471	1	2.0012	LIG4	.
	regulation of protein kinase A signaling (GO:0010738)	1/19	0.397471	1	2.0012	AKAP6	.
	primary alcohol metabolic process (GO:0034308)	1/19	0.397471	1	2.0012	RDH11	.
	negative regulation of lymphocyte activation (GO:0051250)	1/19	0.397471	1	2.0012	FCGR2B	.
	negative regulation of phosphate metabolic process (GO:0045936)	1/19	0.397471	1	2.0012	CDKN1C	.
	negative regulation of cell junction assembly (GO:1901889)	1/19	0.397471	1	2.0012	PHLDB2	.
	negative regulation of protein localization to plasma membrane (GO:1903077)	1/19	0.397471	1	2.0012	NUMB	.
	cellular polysaccharide catabolic process (GO:0044247)	1/19	0.397471	1	2.0012	STBD1	.
	acetylcholine receptor signaling pathway (GO:0095500)	1/19	0.397471	1	2.0012	LY6G6E	.
	positive regulation of activated T cell proliferation (GO:0042104)	1/19	0.397471	1	2.0012	CD24	.
	negative regulation of proteolysis involved in cellular protein catabolic process (GO:1903051)	1/19	0.397471	1	2.0012	EFNA1	.
	production of small RNA involved in gene silencing by RNA (GO:0070918)	1/19	0.397471	1	2.0012	PRKRA	.
	sulfur compound transport (GO:0072348)	1/19	0.397471	1	2.0012	SLC44A4	.
	acylglycerol biosynthetic process (GO:0046463)	1/19	0.397471	1	2.0012	PLCE1	.
	morphogenesis of an epithelium (GO:0002009)	1/19	0.397471	1	2.0012	RIPK4	.
	cyclic nucleotide biosynthetic process (GO:0009190)	1/19	0.397471	1	2.0012	ADCY6	.
	regulation of mitochondrial fission (GO:0090140)	1/19	0.397471	1	2.0012	DCN	.
	regulation of transcription factor import into nucleus (GO:0042990)	1/19	0.397471	1	2.0012	CDH1	.
	leukotriene metabolic process (GO:0006691)	1/19	0.397471	1	2.0012	GGT1	.
	extrinsic apoptotic signaling pathway in absence of ligand (GO:0097192)	1/19	0.397471	1	2.0012	ERBB3	.
	gamma-aminobutyric acid signaling pathway (GO:0007214)	1/19	0.397471	1	2.0012	GABBR1	.
	folic acid metabolic process (GO:0046655)	1/19	0.397471	1	2.0012	ALDH1L2	.
	cellular response to interleukin-7 (GO:0098761)	1/19	0.397471	1	2.0012	IRS1	.
	positive regulation of excitatory postsynaptic potential (GO:2000463)	1/19	0.397471	1	2.0012	PRKCZ	.
	regulation of neuron migration (GO:2001222)	1/19	0.397471	1	2.0012	ADGRG1	.
	negative regulation of protein localization to cell periphery (GO:1904376)	1/19	0.397471	1	2.0012	NUMB	.
	nucleotide-sugar biosynthetic process (GO:0009226)	1/19	0.397471	1	2.0012	GFPT2	.
	calcium ion transport into cytosol (GO:0060402)	1/19	0.397471	1	2.0012	JPH1	.
	positive regulation of phospholipase activity (GO:0010518)	1/19	0.397471	1	2.0012	FGFR1	.
	positive regulation of pri-miRNA transcription from RNA polymerase II promoter (GO:1902895)	1/19	0.397471	1	2.0012	TGFB2	.
	DNA double-strand break processing (GO:0000729)	1/19	0.397471	1	2.0012	EXD2	.
	interleukin-7-mediated signaling pathway (GO:0038111)	1/19	0.397471	1	2.0012	IRS1	.
	negative regulation of calcium ion transport (GO:0051926)	1/19	0.397471	1	2.0012	PACSIN3	.
	positive regulation of transcription regulatory region DNA binding (GO:2000679)	1/19	0.397471	1	2.0012	GATA3	.
	positive regulation of cellular response to transforming growth factor beta stimulus (GO:1903846)	1/19	0.397471	1	2.0012	CDKN1C	.
	regulation of catenin import into nucleus (GO:0035412)	1/19	0.397471	1	2.0012	AXIN2	.
	response to interferon-beta (GO:0035456)	1/19	0.397471	1	2.0012	ACOD1	.
	positive regulation of axon extension (GO:0045773)	1/19	0.397471	1	2.0012	L1CAM	.
	chemokine-mediated signaling pathway (GO:0070098)	2/52	0.398788	1	1.46242	CCL22;CX3CL1	.
	regulation of calcium ion transport (GO:0051924)	2/52	0.398788	1	1.46242	CRACR2A;PACSIN3	.
	positive regulation of mitotic cell cycle (GO:0045931)	2/52	0.398788	1	1.46242	FOXA1;ASNS	.
	cytokine-mediated signaling pathway (GO:0019221)	18/633	0.401052	1	1.08122	LAMA5;CCL22;IRS1;RPLP0;GATA3;MID1;CSF2RA;ST18;CX3CL1;DCN;ZEB1;CCND1;IRF4;SDC1;FYN;RHOU;STX3;IRF6	.
	positive regulation of cellular component biogenesis (GO:0044089)	3/87	0.401968	1	1.31113	DLG5;SDC1;PFN2	.
	cellular response to tumor necrosis factor (GO:0071356)	6/194	0.402259	1	1.17596	CCL22;ERBIN;ACOD1;GATA3;ST18;CX3CL1	.
	positive regulation of cellular biosynthetic process (GO:0031328)	5/159	0.407197	1	1.19569	MLXIPL;IRS1;PDGFC;NOS1AP;ERBB2	.
	negative regulation of cellular response to transforming growth factor beta stimulus (GO:1903845)	2/53	0.40804	1	1.43482	CD109;CAV1	.
	positive regulation of protein import into nucleus (GO:0042307)	2/53	0.40804	1	1.43482	JUP;CDH1	.
	regulation of stem cell differentiation (GO:2000736)	3/88	0.409048	1	1.29623	YAP1;TACSTD2;GATA3	.
	platelet degranulation (GO:0002576)	4/124	0.412003	1	1.22654	TGFB2;CD109;RAB27B;GTPBP2	.
	negative regulation of innate immune response (GO:0045824)	1/20	0.413332	1	1.90114	ACOD1	.
	proteoglycan metabolic process (GO:0006029)	1/20	0.413332	1	1.90114	SULF2	.
	regulation of epidermal cell differentiation (GO:0045604)	1/20	0.413332	1	1.90114	CTSV	.
	positive regulation of dendritic spine development (GO:0060999)	1/20	0.413332	1	1.90114	DLG5	.
	viral budding via host ESCRT complex (GO:0039702)	1/20	0.413332	1	1.90114	CHMP4C	.
	negative regulation of ion transport (GO:0043271)	1/20	0.413332	1	1.90114	PACSIN3	.
	embryonic digestive tract development (GO:0048566)	1/20	0.413332	1	1.90114	TGFB2	.
	negative regulation of cyclase activity (GO:0031280)	1/20	0.413332	1	1.90114	GABBR1	.
	purine nucleotide metabolic process (GO:0006163)	1/20	0.413332	1	1.90114	PNP	.
	dopamine metabolic process (GO:0042417)	1/20	0.413332	1	1.90114	TGFB2	.
	Arp2/3 complex-mediated actin nucleation (GO:0034314)	1/20	0.413332	1	1.90114	JMY	.
	autophagy of nucleus (GO:0044804)	1/20	0.413332	1	1.90114	ATG9B	.
	regulation of cell development (GO:0060284)	1/20	0.413332	1	1.90114	YAP1	.
	striated muscle cell development (GO:0055002)	1/20	0.413332	1	1.90114	SDC1	.
	regulation of response to cytokine stimulus (GO:0060759)	1/20	0.413332	1	1.90114	CD24	.
	branching involved in ureteric bud morphogenesis (GO:0001658)	1/20	0.413332	1	1.90114	BMP2	.
	regulation of glycogen biosynthetic process (GO:0005979)	1/20	0.413332	1	1.90114	IRS1	.
	aromatic amino acid family catabolic process (GO:0009074)	1/20	0.413332	1	1.90114	TAT	.
	inactivation of MAPK activity (GO:0000188)	1/20	0.413332	1	1.90114	CAV1	.
	melanosome localization (GO:0032400)	1/20	0.413332	1	1.90114	RAB27B	.
	inositol phosphate-mediated signaling (GO:0048016)	1/20	0.413332	1	1.90114	PLCE1	.
	heparan sulfate proteoglycan metabolic process (GO:0030201)	1/20	0.413332	1	1.90114	SULF2	.
	eye morphogenesis (GO:0048592)	1/20	0.413332	1	1.90114	ALDH1A3	.
	regulation of fibroblast growth factor receptor signaling pathway (GO:0040036)	1/20	0.413332	1	1.90114	SULF2	.
	negative regulation of adenylate cyclase activity (GO:0007194)	1/20	0.413332	1	1.90114	GABBR1	.
	chondroitin sulfate biosynthetic process (GO:0030206)	1/20	0.413332	1	1.90114	DCN	.
	cellular response to steroid hormone stimulus (GO:0071383)	1/20	0.413332	1	1.90114	ACOD1	.
	dopaminergic neuron differentiation (GO:0071542)	1/20	0.413332	1	1.90114	FOXA1	.
[truncated: 700 more rows]

## Sheet: magenta
Supplementary File S10: The complete list of the functional enrichment analysis of the hub genes in the eight non-preserved modules
[truncated: 1,361 more rows]

[truncated: 5 more sheets: purple, darkgreen, red, midnightblue, lightgreen]
